# Supplementary material for: CAZymes from the thermophilic fungus Thermoascus aurantiacus are induced by C5 and C6 sugars
Source: Biotechnol Biofuels. 2021 Aug 12;14:169. doi: 10.1186/s13068-021-02018-5 (PMC8359064; doi:10.1186/s13068-021-02018-5)
Supplement: Supplementary file 2 — Additional file 2. Tables for differential expression by T. aurantiacus induced with C5 and C6 sugars. Data is shown for genes whose differential expression has an adjusted pval < 1. [file 13068_2021_2018_MOESM2_ESM.xlsx]

## Sheet: Xylose vs. arabinose
Gene	logFC	AveExpr	P.Value	adj.P.Val
gene_7695	2.16148	7.29635	3.44483e-07	0.00278997
gene_5895	2.29891	7.43154	9.73346e-07	0.00394156
gene_6069	2.63175	8.04931	2.91406e-06	0.00786699
gene_2500	1.4224	7.81792	6.24102e-06	0.0126365
gene_6083	1.74405	6.82219	1.26352e-05	0.0178895
gene_4545	-1.69789	4.77638	1.32531e-05	0.0178895
gene_1143	1.65053	7.17855	1.73316e-05	0.0179485
gene_2555	-1.8643	4.94773	1.77291e-05	0.0179485
gene_6068	2.17342	7.89349	2.38066e-05	0.0214233
gene_1814	1.12061	7.63571	2.67238e-05	0.0216436
gene_6284	1.49402	8.27154	3.37361e-05	0.0245173
gene_5912	1.54024	4.94423	3.89492e-05	0.0245173
gene_3464	2.20425	5.0898	3.93536e-05	0.0245173
gene_6759	2.56109	8.50134	4.48723e-05	0.0259586
gene_6067	1.45566	7.49653	5.19433e-05	0.0265631
gene_8462	-2.33683	2.29394	5.24769e-05	0.0265631
gene_8488	1.10123	9.86145	6.15493e-05	0.0293228
gene_4336	-3.24799	1.38394	0.000106809	0.0480581
gene_2823	-2.55876	3.51892	0.000141279	0.0602222
gene_7621	1.1679	7.15239	0.000155696	0.0630492
gene_1628	3.08558	1.84683	0.000195546	0.0754156
gene_8822	1.20158	5.76397	0.000230189	0.0817575
gene_829	0.874177	6.65853	0.00023218	0.0817575
gene_6927	1.17525	4.71146	0.000289877	0.094932
gene_1041	1.03447	6.40724	0.000298449	0.094932
gene_2808	1.17326	6.44952	0.000304758	0.094932
gene_3221	1.31059	7.00257	0.00038284	0.108368
gene_4046	1.29394	8.45648	0.000383124	0.108368
gene_2755	-1.15434	4.97923	0.000388032	0.108368
gene_1315	-1.60561	6.75189	0.000488568	0.131897
gene_5408	1.08413	8.76035	0.000586201	0.15315
gene_904	0.940335	6.38386	0.000677477	0.171465
gene_3201	2.36928	7.92497	0.000743236	0.182408
gene_3169	1.45733	10.535	0.000851322	0.20194
gene_447	-2.71143	0.312012	0.000874073	0.20194
gene_6520	-2.80094	-0.465211	0.000921152	0.20194
gene_7989	1.60836	3.87985	0.000932062	0.20194
gene_909	0.848344	5.30788	0.000947491	0.20194
gene_6815	1.01055	7.9783	0.000981139	0.20375
gene_2903	-0.921427	5.11116	0.00110154	0.221328
gene_3334	-1.3202	5.11083	0.00112044	0.221328
gene_2251	-0.913298	8.42596	0.00121986	0.223924
gene_7128	-1.42353	3.84538	0.00125619	0.223924
gene_2192	-0.774336	5.58353	0.00127108	0.223924
gene_7812	0.937433	7.32914	0.00132116	0.223924
gene_680	-0.988211	5.80597	0.00133933	0.223924
gene_2701	0.855371	7.11296	0.00137213	0.223924
gene_1622	0.983247	4.96352	0.00142468	0.223924
gene_5551	0.974544	9.28354	0.00145799	0.223924
gene_2014	1.83803	7.90857	0.00147279	0.223924
gene_6803	0.767218	6.7286	0.0014739	0.223924
gene_415	0.839451	9.42785	0.00150759	0.223924
gene_4457	-1.15977	5.82084	0.00152419	0.223924
gene_8643	-2.77128	0.437714	0.0015341	0.223924
gene_1785	2.32761	2.45198	0.00154465	0.223924
gene_50	1.33093	3.86228	0.00154972	0.223924
gene_5471	-0.999735	5.27149	0.00160486	0.223924
gene_601	1.65154	6.36713	0.00162096	0.223924
gene_2415	-1.83395	9.1378	0.00163126	0.223924
gene_585	0.979697	5.71844	0.00169223	0.224871
gene_493	0.76384	6.29569	0.00169368	0.224871
gene_3238	1.22291	5.08499	0.00176207	0.22859
gene_1258	2.54722	0.749238	0.00179952	0.22859
gene_2736	0.973086	7.37024	0.00180636	0.22859
gene_8748	-1.25976	5.87554	0.00190727	0.234675
gene_8133	3.1702	0.844641	0.00194846	0.234675
gene_3463	1.18192	7.20136	0.0019751	0.234675
gene_4099	-1.40143	3.01478	0.00202552	0.234675
gene_4510	1.03274	5.92942	0.00204578	0.234675
gene_8620	2.67523	0.974501	0.00205381	0.234675
gene_7712	-0.905807	5.35322	0.00218835	0.234675
gene_577	1.04057	4.42861	0.00219647	0.234675
gene_8509	-0.89071	7.58367	0.00220963	0.234675
gene_5958	0.891312	8.02099	0.00226191	0.234675
gene_3781	-0.906102	7.09429	0.00232241	0.234675
gene_6325	1.1454	4.36261	0.00233449	0.234675
gene_2926	-1.62569	7.0414	0.00240438	0.234675
gene_7724	2.20688	9.7947	0.00241662	0.234675
gene_5354	-2.16164	-0.635357	0.00242193	0.234675
gene_2091	-1.09346	5.24023	0.00242296	0.234675
gene_5404	0.732072	5.84235	0.00244116	0.234675
gene_5886	0.683751	7.22963	0.00244874	0.234675
gene_6150	-2.39044	-0.529693	0.00245389	0.234675
gene_2178	2.16442	1.58585	0.00247131	0.234675
gene_5532	0.617307	6.69333	0.00253131	0.234675
gene_2049	2.44325	-0.660317	0.00253883	0.234675
gene_8793	-2.62098	2.9339	0.00254029	0.234675
gene_7908	0.866808	8.32438	0.00254987	0.234675
gene_3726	1.1568	3.73552	0.00259611	0.236246
gene_3122	-2.19688	1.34529	0.00265779	0.236463
gene_2858	0.702726	7.01408	0.00276551	0.236463
gene_8794	-1.86021	5.02397	0.00276599	0.236463
gene_8286	-0.953357	4.55907	0.00277675	0.236463
gene_6637	1.14681	4.49285	0.00279378	0.236463
gene_2905	-1.81998	3.1229	0.00279556	0.236463
gene_3397	1.62176	8.40373	0.0028122	0.236463
gene_1291	0.772554	6.28274	0.00283748	0.236463
gene_690	-0.778514	7.16331	0.00286126	0.236463
gene_5480	0.950852	7.98876	0.00296586	0.242631
gene_6526	1.02264	5.81976	0.00308601	0.249534
gene_7904	1.89025	2.78748	0.00312652	0.249534
gene_3914	2.45932	0.0309894	0.00314267	0.249534
gene_5524	0.709806	5.44916	0.00321017	0.252419
gene_7570	-2.1381	4.62976	0.00336186	0.259331
gene_758	0.760802	7.39116	0.003384	0.259331
gene_2418	-1.09766	5.52882	0.00339413	0.259331
gene_7257	0.787668	9.10591	0.00348902	0.264089
gene_8336	-2.52231	1.80737	0.00353598	0.265165
gene_2734	1.98025	8.07458	0.00361532	0.266454
gene_7500	0.867246	5.09518	0.00364985	0.266454
gene_1637	-0.940576	4.08034	0.00365186	0.266454
gene_3467	1.14342	5.15696	0.00368868	0.266738
gene_476	1.31161	8.00016	0.00375205	0.268919
gene_8615	-0.978215	5.56116	0.00383215	0.272251
gene_6146	1.32925	6.14724	0.00393424	0.277073
gene_3634	0.715413	6.16941	0.00402042	0.280702
gene_462	-2.00146	4.90934	0.0043384	0.298037
gene_6956	-1.5801	2.63252	0.00434231	0.298037
gene_1247	2.91659	0.00486669	0.00463338	0.310813
gene_8772	1.25688	10.671	0.00464742	0.310813
gene_2745	0.724828	5.53096	0.00469567	0.310813
gene_1383	-1.15343	4.27024	0.00473788	0.310813
gene_5509	-2.18905	1.1293	0.0047571	0.310813
gene_471	0.768438	6.45843	0.00478822	0.310813
gene_8139	-1.55666	4.02539	0.00479708	0.310813
gene_4549	-2.20239	1.26006	0.00484115	0.311178
gene_5540	-2.07603	4.43726	0.00495631	0.316072
gene_3409	0.904638	6.84944	0.00505139	0.318714
gene_4362	-0.829136	6.02095	0.00507644	0.318714
gene_1418	-2.89527	0.513466	0.00513343	0.319813
gene_2232	-1.31186	4.14157	0.00529153	0.327146
gene_4415	0.949258	6.9421	0.0054123	0.332077
gene_6519	-1.44722	3.03089	0.00557697	0.334792
gene_1187	1.06248	6.89667	0.00559994	0.334792
gene_4559	-1.34588	3.48802	0.00562525	0.334792
gene_5871	1.00556	6.03268	0.00566769	0.334792
gene_5530	-2.26769	7.108	0.00569744	0.334792
gene_5853	0.689152	4.91461	0.0057381	0.334792
gene_4151	-0.582276	8.04454	0.00574591	0.334792
gene_2200	-0.909698	8.30683	0.00584394	0.337172
gene_964	-1.33035	4.34652	0.00589059	0.337172
gene_1909	-2.06435	2.89153	0.00591165	0.337172
gene_66	-1.24588	4.49244	0.00603026	0.340429
gene_1068	0.904346	7.48126	0.00606618	0.340429
gene_8792	-1.58353	4.73637	0.00609486	0.340429
gene_798	0.937568	5.99971	0.00613829	0.340507
gene_2975	0.775105	6.42333	0.00623664	0.343293
gene_1114	-0.676389	6.13086	0.00632072	0.343293
gene_5243	2.15014	2.03249	0.00632759	0.343293
gene_2654	-1.39558	5.11028	0.00635807	0.343293
gene_375	-1.01347	4.00551	0.00646873	0.346955
gene_8535	0.722189	7.36518	0.00651467	0.34712
gene_6128	-1.03493	5.10679	0.00661994	0.350424
gene_1090	0.802104	7.34726	0.00683144	0.359272
gene_7408	1.12477	6.58892	0.00694542	0.361044
gene_7140	1.0044	6.41707	0.00695948	0.361044
gene_7696	0.596534	5.8154	0.00701765	0.361044
gene_5872	1.46532	7.65116	0.00704346	0.361044
gene_5990	-1.02371	3.83351	0.00711747	0.362543
gene_2645	-1.26348	4.13	0.00716504	0.362685
gene_5526	0.815431	8.70174	0.00729916	0.365783
gene_2567	0.656214	5.92659	0.0073403	0.365783
gene_2437	-1.22133	7.20307	0.00736916	0.365783
gene_2378	0.711921	7.89125	0.00740689	0.365783
gene_2431	0.776872	6.34498	0.00757314	0.370778
gene_582	0.937015	8.00284	0.00759961	0.370778
gene_1987	0.725546	6.42387	0.00766665	0.371131
gene_4078	-1.46161	2.94298	0.00786226	0.371131
gene_1920	0.688456	6.12041	0.00788056	0.371131
gene_7167	0.660008	6.19324	0.00788776	0.371131
gene_5868	1.05784	4.54722	0.00796789	0.371131
gene_6275	0.727238	7.23584	0.00809985	0.371131
gene_6437	1.03302	4.88244	0.00811613	0.371131
gene_1115	-1.06842	4.15873	0.00817287	0.371131
gene_1338	-1.94604	1.47017	0.008184	0.371131
gene_4472	0.839378	6.24737	0.00820169	0.371131
gene_2245	-1.59384	1.44136	0.00820723	0.371131
gene_4590	0.955594	4.72155	0.00821502	0.371131
gene_2468	-0.985779	3.93581	0.00824364	0.371131
gene_1676	0.649029	6.68977	0.00824837	0.371131
gene_4450	2.13227	1.77241	0.00830692	0.3717
gene_5604	1.07725	5.07491	0.00850447	0.371872
gene_2123	-1.4016	4.47214	0.00857403	0.371872
gene_1448	1.34576	7.22646	0.00860939	0.371872
gene_4228	0.826187	7.54873	0.0086828	0.371872
gene_787	0.997006	6.75116	0.00869914	0.371872
gene_1988	-2.36618	4.67525	0.00870978	0.371872
gene_5105	0.683357	6.14963	0.00875988	0.371872
gene_5228	2.32732	-0.529693	0.00878747	0.371872
gene_3743	-1.04239	4.60384	0.00879318	0.371872
gene_8438	0.578482	6.04574	0.00881103	0.371872
gene_8196	-0.922909	6.00475	0.00881584	0.371872
gene_8613	-0.491779	6.10915	0.00902821	0.378857
gene_374	-0.841219	4.45884	0.00918697	0.380021
gene_3091	-0.866283	5.5287	0.00919068	0.380021
gene_2154	0.58706	6.105	0.00923952	0.380021
gene_3848	0.972106	8.31168	0.00924363	0.380021
gene_2940	0.650134	7.52692	0.00929148	0.380059
gene_6509	1.91824	1.42031	0.00942681	0.383595
gene_699	-0.809515	4.67593	0.0094843	0.383595
gene_727	1.31433	3.93644	0.00952	0.383595
gene_8693	0.672167	7.54365	0.0096097	0.38502
gene_1790	0.596882	6.07664	0.00965046	0.38502
gene_2419	-1.1607	7.09419	0.00980276	0.388514
gene_4484	0.757538	5.46615	0.00984185	0.388514
gene_5294	-1.082	4.65817	0.00988196	0.388514
gene_7074	0.966746	5.21702	0.0100272	0.39232
gene_4846	0.91198	4.54758	0.0102109	0.397296
gene_8138	-3.07734	1.43015	0.0102697	0.397296
gene_1506	-1.17759	5.36258	0.0103015	0.397296
gene_7589	-0.912282	4.57141	0.0103912	0.398253
gene_2459	0.690005	5.58853	0.0104247	0.398253
gene_3285	0.738473	7.09602	0.0105728	0.402015
gene_1326	0.658106	7.58726	0.0107189	0.403742
gene_3386	1.09491	8.47974	0.0107778	0.403742
gene_5949	0.732572	9.23093	0.0107879	0.403742
gene_8745	1.05877	5.13769	0.0108176	0.403742
gene_954	-0.7454	8.78988	0.0109288	0.404597
gene_5672	0.546731	7.22837	0.0109792	0.404597
gene_3109	-0.924848	4.38639	0.0110302	0.404597
gene_8650	0.81117	8.20295	0.0111125	0.404597
gene_3270	1.0786	3.93173	0.0111545	0.404597
gene_8314	0.94265	5.81679	0.0111606	0.404597
gene_5372	2.10402	1.31322	0.0112021	0.404597
gene_5539	-1.64124	6.96429	0.0113262	0.404597
gene_7714	-0.837326	5.24717	0.0114452	0.404597
gene_1687	1.6311	4.88195	0.0114508	0.404597
gene_8622	1.87311	2.25111	0.0114582	0.404597
gene_3234	1.17751	9.49282	0.0114901	0.404597
gene_1943	-0.720533	5.02783	0.0114992	0.404597
gene_3237	0.607794	7.72478	0.0115399	0.404597
gene_2756	-0.966352	3.58985	0.0116698	0.405142
gene_1586	0.739184	5.37352	0.0116829	0.405142
gene_4421	0.980372	5.46886	0.0117055	0.405142
gene_6877	1.8302	1.03813	0.0118832	0.406482
gene_7057	0.519089	8.55977	0.0119561	0.406482
gene_3288	0.777228	7.17581	0.0119633	0.406482
gene_6313	-0.604071	6.85255	0.0120253	0.406482
gene_1031	-1.85389	0.227514	0.0120424	0.406482
gene_6616	0.701168	5.77256	0.0121657	0.406482
gene_2782	0.816045	7.31679	0.012181	0.406482
gene_8123	-1.45206	3.45345	0.0122882	0.406482
gene_1634	-1.0289	4.45034	0.0123146	0.406482
gene_1927	0.886606	4.75295	0.0123251	0.406482
gene_895	0.606651	6.1243	0.012376	0.406482
gene_8805	1.04958	4.17415	0.0123889	0.406482
gene_7906	-0.864782	6.5498	0.0123967	0.406482
gene_4611	-0.761885	5.94456	0.0124678	0.40655
gene_8676	-0.609742	6.17274	0.0126631	0.40655
gene_3509	0.937395	4.99589	0.0126698	0.40655
gene_6667	-1.02018	3.40626	0.012691	0.40655
gene_5967	-1.69331	3.13298	0.012701	0.40655
gene_7655	-2.50789	2.05913	0.0127038	0.40655
gene_4685	-1.05479	3.39096	0.0127502	0.40655
gene_8457	0.713635	5.55094	0.0128086	0.406812
gene_5656	1.28248	4.01478	0.0131057	0.41462
gene_7379	-0.54105	7.1616	0.0131871	0.415573
gene_2239	-0.976947	4.99994	0.0133298	0.417848
gene_1803	-0.964801	5.56753	0.0133625	0.417848
gene_5290	0.760316	7.34488	0.0134552	0.417923
gene_1167	0.747706	6.1827	0.0135393	0.417923
gene_2319	0.608791	5.41898	0.0135886	0.417923
gene_8116	-0.709837	6.36014	0.0136104	0.417923
gene_4684	-0.76928	7.60497	0.013662	0.417923
gene_4352	-1.97783	-0.120098	0.0136745	0.417923
gene_7591	-1.20166	4.67221	0.0137471	0.418564
gene_1838	-0.701974	6.08527	0.0138836	0.420676
gene_2047	1.29497	7.34331	0.0139369	0.420676
gene_6375	-0.680102	6.58117	0.0139934	0.420676
gene_155	0.614695	7.16971	0.0140319	0.420676
gene_1215	-1.11408	4.89773	0.0141526	0.420676
gene_1508	1.26336	3.59172	0.0142478	0.420676
gene_3147	-1.30685	4.38561	0.0142694	0.420676
gene_7011	1.0333	6.74705	0.0143699	0.420676
gene_4543	-1.37908	3.09351	0.0144268	0.420676
gene_4863	-1.17024	4.8097	0.0144652	0.420676
gene_7806	0.93841	6.95569	0.0145003	0.420676
gene_3381	0.994722	6.88411	0.0146264	0.420676
gene_350	0.486072	6.32922	0.0146347	0.420676
gene_8226	0.585744	7.15264	0.0147642	0.420676
gene_7650	0.56929	6.77485	0.0149157	0.420676
gene_8832	2.33716	-0.236872	0.014961	0.420676
gene_6307	0.805836	4.96152	0.0149952	0.420676
gene_1398	-0.654036	5.10856	0.0150131	0.420676
gene_1102	-1.06798	3.45732	0.0150211	0.420676
gene_4404	1.54244	1.85638	0.0151551	0.420676
gene_5880	-1.6366	1.69383	0.0151591	0.420676
gene_1178	0.775992	7.98885	0.01519	0.420676
gene_197	-1.71843	4.90414	0.0152166	0.420676
gene_751	-0.665708	4.99399	0.0152325	0.420676
gene_6635	-0.89747	3.99381	0.0152685	0.420676
gene_8186	-1.61612	4.62181	0.0156355	0.420676
gene_1771	2.21794	3.32859	0.0156473	0.420676
gene_2011	-2.25065	1.0945	0.0156561	0.420676
gene_7410	0.738069	5.51968	0.015743	0.420676
gene_907	0.563478	6.13117	0.0157855	0.420676
gene_4695	-1.06615	4.27177	0.0157947	0.420676
gene_8549	0.873212	4.4572	0.0158028	0.420676
gene_6996	2.3525	0.978377	0.0158195	0.420676
gene_3760	-1.08151	4.4182	0.0158318	0.420676
gene_2438	0.854049	5.83565	0.0158402	0.420676
gene_3466	0.705463	6.40238	0.015846	0.420676
gene_113	-1.21204	3.22113	0.0158829	0.420676
gene_1696	1.66554	4.65232	0.0158875	0.420676
gene_2615	0.488429	6.18779	0.0160017	0.420676
gene_1862	-0.674297	5.08496	0.0160401	0.420676
gene_3487	-1.12235	3.07574	0.0161091	0.420676
gene_7047	-1.40277	4.60134	0.0161253	0.420676
gene_2943	-0.990708	4.6395	0.0161704	0.420676
gene_4659	0.761654	5.62888	0.0161755	0.420676
gene_505	1.53255	3.39323	0.0162437	0.420676
gene_5698	1.3703	1.56472	0.0163342	0.420676
gene_8155	0.963464	9.41306	0.0164017	0.420676
gene_362	-1.12792	3.48988	0.0164033	0.420676
gene_7871	0.797638	8.4833	0.0164604	0.420676
gene_209	-1.21707	3.87062	0.0164665	0.420676
gene_7159	0.95084	4.20816	0.0164906	0.420676
gene_5658	1.0274	3.99159	0.0165175	0.420676
gene_1977	1.29008	5.10784	0.0166527	0.42245
gene_114	-0.752285	5.35042	0.0167642	0.42245
gene_4557	-2.32814	0.465544	0.0168012	0.42245
gene_1513	-0.867001	4.17855	0.0168395	0.42245
gene_4647	0.926174	8.22643	0.0168495	0.42245
gene_391	1.06014	5.83036	0.0169001	0.42245
gene_1826	0.694737	6.19329	0.0170011	0.423668
gene_6875	0.643702	6.16954	0.0171177	0.424466
gene_5675	-1.84761	1.11119	0.0171523	0.424466
gene_151	0.632448	6.23795	0.0171904	0.424466
gene_8839	-0.841162	5.86281	0.017399	0.42831
gene_3446	-0.513284	8.5593	0.0175062	0.428851
gene_8089	-0.597134	7.41978	0.0175268	0.428851
gene_6900	1.97253	0.34058	0.0176376	0.429181
gene_5879	0.721083	4.81065	0.0176558	0.429181
gene_6523	1.23319	4.32486	0.0177556	0.429181
gene_7863	-0.532883	8.79318	0.0177721	0.429181
gene_5087	0.610016	7.41072	0.0178541	0.429181
gene_1616	-0.679117	6.45721	0.0178583	0.429181
gene_5264	-0.905476	4.99957	0.0179384	0.429831
gene_358	0.604511	7.58878	0.0180568	0.431392
gene_8864	0.650565	7.47292	0.0181245	0.431737
gene_4097	-2.69425	0.949917	0.0183488	0.434903
gene_3001	-0.718381	4.26719	0.0183897	0.434903
gene_8733	0.499501	6.18926	0.0184185	0.434903
gene_4974	-0.860847	4.54621	0.0185867	0.435867
gene_2248	0.613714	5.65531	0.0186684	0.435867
gene_7963	1.4849	9.63714	0.0186835	0.435867
gene_623	0.737325	5.37622	0.0186925	0.435867
gene_4302	0.475768	5.89177	0.0187757	0.435867
gene_7094	-1.97927	1.45024	0.0187823	0.435867
gene_3057	-1.1518	3.6157	0.0188374	0.435897
gene_4928	1.39279	3.5955	0.0189988	0.43751
gene_2322	0.778964	4.1681	0.019162	0.43751
gene_383	0.593896	5.35166	0.0192379	0.43751
gene_1172	0.745265	5.37299	0.0192983	0.43751
gene_5120	0.816306	4.04688	0.0193243	0.43751
gene_2595	-0.511746	5.3353	0.0193468	0.43751
gene_1133	-0.59843	5.55219	0.0193549	0.43751
gene_7560	-1.45392	1.72345	0.0194273	0.43751
gene_5726	0.54759	6.26428	0.0194657	0.43751
gene_6025	2.0154	-0.104505	0.0194719	0.43751
gene_2977	0.756519	5.7983	0.0195013	0.43751
gene_6132	0.979679	4.06558	0.0195702	0.437531
gene_5005	0.760843	6.9663	0.0196103	0.437531
gene_3955	0.778305	5.99212	0.0197051	0.438439
gene_7750	-0.76963	4.54137	0.0198408	0.440248
gene_1382	0.622697	5.70369	0.01994	0.441242
gene_1287	-1.03912	4.54697	0.0201481	0.443473
gene_7923	0.716643	5.56126	0.0201504	0.443473
gene_265	-2.17305	1.85048	0.0202923	0.443835
gene_7962	2.17154	-0.294194	0.0203207	0.443835
gene_6039	0.930792	5.11436	0.0203313	0.443835
gene_3864	0.698583	5.83317	0.0205588	0.444962
gene_2320	-1.02303	3.63254	0.0205647	0.444962
gene_1314	-0.779123	6.57757	0.0205958	0.444962
gene_1503	0.66215	5.44987	0.0206026	0.444962
gene_2788	0.64193	7.06681	0.0207021	0.445502
gene_5525	0.776416	6.04655	0.0207377	0.445502
gene_5170	0.849062	3.68284	0.0208231	0.446155
gene_8159	-1.25695	3.02186	0.0209854	0.448445
gene_7452	1.60656	8.39229	0.0210726	0.449125
gene_4751	-1.09536	4.44377	0.0212304	0.449461
gene_5870	0.907712	7.29417	0.0212528	0.449461
gene_1089	-1.6809	0.9727	0.0212847	0.449461
gene_3479	-1.32969	5.95581	0.0214359	0.449461
gene_5190	0.575235	7.80264	0.0214413	0.449461
gene_8190	0.490596	6.0535	0.0214661	0.449461
gene_1257	0.493261	6.60751	0.0215463	0.449461
gene_8216	-0.718043	6.21011	0.0215542	0.449461
gene_4767	-0.869998	5.37043	0.0216003	0.449461
gene_7802	-0.693854	6.20674	0.0216434	0.449461
gene_8045	-1.76232	2.95999	0.0218387	0.449894
gene_1322	0.519152	5.61362	0.0218536	0.449894
gene_4261	1.30621	3.64551	0.0218863	0.449894
gene_8774	0.426235	6.84774	0.0219058	0.449894
gene_5292	1.31584	3.75821	0.0219464	0.449894
gene_7825	-0.840885	5.48845	0.0219975	0.449894
gene_5245	0.731194	6.2774	0.0220625	0.450086
gene_7956	-1.49901	4.87118	0.022255	0.450219
gene_4269	0.686535	5.62162	0.0222829	0.450219
gene_4829	-1.21557	2.37994	0.0222877	0.450219
gene_3896	0.463059	7.65818	0.0222914	0.450219
gene_7901	0.487734	6.92333	0.0226081	0.454368
gene_1690	-0.916489	6.23873	0.022609	0.454368
gene_3836	-0.949806	3.99351	0.0228435	0.457945
gene_8764	0.699619	4.49453	0.0229791	0.459525
gene_7625	0.50541	6.75932	0.0231471	0.461591
gene_7946	-1.85389	0.533274	0.0231964	0.461591
gene_3965	0.779708	8.21521	0.023291	0.462338
gene_5246	1.92927	0.337926	0.0234076	0.462502
gene_6595	1.78742	0.945101	0.0234135	0.462502
gene_4649	-0.999544	3.88076	0.0235368	0.462798
gene_8651	-1.17109	2.88085	0.0236113	0.462798
gene_3312	0.626307	5.65218	0.0236342	0.462798
gene_1904	-1.19868	4.42773	0.023657	0.462798
gene_4325	0.683116	5.10947	0.0237395	0.463293
gene_2927	-2.11185	0.66019	0.0238378	0.464091
gene_4732	-0.596737	6.15019	0.0240092	0.466308
gene_557	1.44468	3.29185	0.0241582	0.467198
gene_1597	-0.50944	7.03627	0.0241956	0.467198
gene_565	-1.89755	-0.416627	0.0242281	0.467198
gene_8234	0.442228	7.14092	0.0243116	0.467695
gene_4906	-0.786713	5.3934	0.0243819	0.467936
gene_3356	-0.594654	5.76498	0.0245101	0.468475
gene_5126	0.675917	5.00625	0.0245896	0.468475
gene_5831	0.908121	6.93204	0.0246722	0.468475
gene_6625	0.434392	7.39122	0.0247225	0.468475
gene_1536	-0.811285	4.64347	0.0247292	0.468475
gene_5579	1.1553	4.18136	0.024757	0.468475
gene_5840	0.782051	4.67643	0.0249258	0.470568
gene_1421	0.713541	7.60541	0.0250576	0.471255
gene_6775	-1.64358	2.93634	0.0250787	0.471255
gene_7138	1.86658	0.261618	0.0252068	0.471255
gene_3873	0.501393	6.12677	0.0252776	0.471255
gene_656	0.5825	5.0546	0.0253297	0.471255
gene_2062	0.654538	5.81347	0.0253618	0.471255
gene_5028	1.80277	0.38335	0.0253904	0.471255
gene_3254	0.647502	5.59116	0.0254276	0.471255
gene_6155	0.647318	4.65823	0.0255737	0.47288
gene_318	0.628558	5.41312	0.0260881	0.476944
gene_767	-2.01525	2.39427	0.0261366	0.476944
gene_1070	-0.921152	3.60459	0.0261827	0.476944
gene_8188	-0.487055	6.34682	0.0262788	0.476944
gene_7314	1.54179	0.520335	0.0262818	0.476944
gene_8280	0.639965	5.91704	0.0263112	0.476944
gene_7627	0.727265	4.95915	0.0263436	0.476944
gene_8013	-2.28692	3.24219	0.0263514	0.476944
gene_7645	0.653009	5.88793	0.0263693	0.476944
gene_8376	-0.701365	5.33867	0.0264084	0.476944
gene_5929	0.722345	5.2122	0.0264413	0.476944
gene_1047	-1.83737	1.35005	0.0266083	0.478766
gene_6086	0.454786	7.03596	0.0267258	0.478766
gene_3761	0.950792	4.38125	0.0267565	0.478766
gene_8060	-0.513258	6.02859	0.0267787	0.478766
gene_3015	-1.84225	1.82425	0.0269049	0.478942
gene_4651	1.15295	4.60111	0.0269245	0.478942
gene_2206	0.510544	7.85314	0.0271101	0.478942
gene_365	0.384505	6.70874	0.0272387	0.478942
gene_8506	0.842868	6.74343	0.0273382	0.478942
gene_5442	-0.997098	5.78343	0.0273432	0.478942
gene_138	-0.432894	7.11701	0.0274045	0.478942
gene_7689	0.599305	7.80181	0.0274149	0.478942
gene_8266	-1.15476	2.80374	0.0275182	0.478942
gene_7909	0.425291	7.26134	0.027567	0.478942
gene_7179	-1.46331	2.09698	0.0275822	0.478942
gene_4172	-0.765764	4.66801	0.0276319	0.478942
gene_7704	-0.642052	4.51022	0.0276686	0.478942
gene_1255	-1.05494	3.3165	0.0276728	0.478942
gene_6854	0.644213	8.06231	0.0277201	0.478942
gene_6397	0.776237	6.77539	0.0277348	0.478942
gene_135	0.584383	7.14115	0.0279195	0.481107
gene_7051	-1.13803	3.59118	0.0280931	0.482641
gene_5959	0.961382	7.61	0.0281277	0.482641
gene_3359	-1.42611	2.61307	0.0282585	0.483859
gene_2936	0.596119	6.81591	0.0285832	0.487194
gene_2767	1.986	0.432481	0.0286176	0.487194
gene_3247	0.648444	5.63656	0.0288891	0.487194
gene_1412	-0.801873	3.96268	0.0289761	0.487194
gene_2490	-0.505066	5.91516	0.0289763	0.487194
gene_3026	0.541247	6.15971	0.0291033	0.487194
gene_1980	-1.70708	1.17192	0.0291173	0.487194
gene_6290	-0.87986	3.99687	0.02913	0.487194
gene_4819	-0.642252	8.12517	0.0291485	0.487194
gene_7940	-0.740288	3.87925	0.0291585	0.487194
gene_3420	0.631785	5.64613	0.0292831	0.487194
gene_121	1.01557	2.42451	0.0293176	0.487194
gene_4083	-1.48588	2.272	0.0293289	0.487194
gene_5036	-1.93513	1.86335	0.0293914	0.487194
gene_5390	-1.08119	5.91917	0.0294404	0.487194
gene_5771	-0.556905	5.74984	0.0294494	0.487194
gene_4603	0.664711	6.82688	0.0294759	0.487194
gene_8224	0.787636	4.82375	0.0295585	0.487252
gene_6657	-0.559397	5.10706	0.0296405	0.487252
gene_221	-1.40027	2.32081	0.0296599	0.487252
gene_986	-0.723766	4.79988	0.0297761	0.488171
gene_1400	-0.795381	4.51439	0.0299539	0.48934
gene_364	0.53755	6.17416	0.0299844	0.48934
gene_815	1.1406	5.75246	0.0300623	0.48934
gene_235	-1.044	3.47656	0.0300891	0.48934
gene_3305	0.522974	6.37871	0.0303166	0.491975
gene_6421	-1.99812	2.1753	0.0303726	0.491975
gene_883	1.36528	2.34695	0.0306786	0.49594
gene_8068	0.730414	5.42081	0.0310269	0.499655
gene_3085	-0.5976	6.01705	0.0310926	0.499655
gene_6292	0.454149	6.50805	0.0310935	0.499655
gene_1714	1.28577	0.527737	0.031171	0.499754
gene_4272	-0.661058	4.38693	0.0312621	0.499754
gene_5100	0.761498	4.19198	0.0313088	0.499754
gene_7055	0.711169	6.60184	0.0313465	0.499754
gene_2764	1.1125	3.62211	0.0314552	0.499955
gene_7773	0.621681	6.05518	0.0315261	0.499955
gene_23	-0.993175	3.74847	0.0315443	0.499955
gene_2579	1.29133	3.56054	0.0318037	0.502299
gene_1769	-0.564842	5.27419	0.0318162	0.502299
gene_4410	0.858636	10.1102	0.03192	0.502957
gene_657	-0.755437	7.91369	0.0321044	0.503277
gene_4049	1.55873	9.78728	0.0321063	0.503277
gene_5957	0.619881	5.85627	0.0321267	0.503277
gene_5805	0.686062	5.34475	0.0322363	0.503868
gene_6161	0.785598	6.3591	0.0322889	0.503868
gene_5954	1.03837	9.45913	0.0324365	0.505158
gene_518	0.61044	6.25514	0.0324963	0.505158
gene_8575	0.511513	6.47169	0.0326477	0.505781
gene_1510	0.808522	3.45781	0.0326613	0.505781
gene_7760	-1.32025	1.96294	0.0328515	0.50698
gene_5203	-1.01832	3.14415	0.0329533	0.50698
gene_8766	0.626796	6.99748	0.0330393	0.50698
gene_6892	0.536133	5.72825	0.0330774	0.50698
gene_8553	-1.58454	2.05536	0.0330918	0.50698
gene_1707	-1.09171	3.59477	0.033149	0.50698
gene_2257	0.485897	6.08582	0.0332895	0.50698
gene_6664	-1.29015	2.41485	0.0333778	0.50698
gene_3054	-0.531834	5.83138	0.0333948	0.50698
gene_1127	-0.760596	5.27139	0.0334207	0.50698
gene_8388	0.707593	7.11972	0.0334505	0.50698
gene_5985	0.5654	5.58974	0.0335105	0.50698
gene_2762	1.20563	4.73601	0.0335524	0.50698
gene_3734	-1.15745	2.82659	0.0337107	0.507757
gene_587	0.470914	7.20813	0.0337293	0.507757
gene_3811	-0.895397	4.61928	0.033882	0.50911
gene_7283	-0.707639	5.7364	0.0339976	0.509551
gene_1662	0.612116	7.70111	0.0340372	0.509551
gene_6402	-1.1545	3.58278	0.0342726	0.511956
gene_553	-1.08288	3.67577	0.0343242	0.511956
gene_4679	-0.860503	7.57938	0.0344226	0.512205
gene_1672	0.62424	6.24957	0.0344674	0.512205
gene_7101	0.910116	4.21379	0.0347666	0.515131
gene_7780	-1.28596	2.77469	0.0347915	0.515131
gene_4497	-1.5371	2.44894	0.0350019	0.516649
gene_4739	0.935383	9.08767	0.035159	0.516649
gene_4851	0.593694	5.95475	0.0351876	0.516649
gene_2195	-0.749302	5.72559	0.0352284	0.516649
gene_2186	-1.50101	1.63245	0.0352774	0.516649
gene_2484	-1.16261	2.3472	0.03533	0.516649
gene_3805	0.685972	4.11201	0.0353736	0.516649
gene_7258	0.476777	7.56929	0.0354274	0.516649
gene_5993	1.93341	-0.205299	0.0354724	0.516649
gene_5653	-0.842051	3.57879	0.0355603	0.516649
gene_1896	-1.46724	0.0428877	0.0356966	0.516649
gene_5938	1.39837	0.729439	0.0357197	0.516649
gene_4771	-0.80918	4.9357	0.0357884	0.516649
gene_7925	-1.51782	1.9329	0.0359428	0.516649
gene_8686	1.91852	0.633279	0.0359808	0.516649
gene_634	0.908342	9.68445	0.0360706	0.516649
gene_2937	1.04045	3.21194	0.0360862	0.516649
gene_8547	-0.754217	3.56167	0.0362186	0.516649
gene_3074	0.682201	7.39859	0.0363043	0.516649
gene_969	-0.403493	7.93005	0.0363619	0.516649
gene_6521	-1.44941	0.346341	0.0363872	0.516649
gene_8784	-0.653481	4.65751	0.0363919	0.516649
gene_8050	-0.550844	6.06838	0.0363952	0.516649
gene_2856	0.866999	4.65074	0.0364251	0.516649
gene_5697	-0.946563	4.12666	0.0365115	0.51697
gene_6819	0.730467	6.01523	0.0365776	0.517001
gene_2087	-1.09855	6.00658	0.0367562	0.518622
gene_5953	1.18563	2.39124	0.036905	0.519331
gene_1565	1.07644	2.91945	0.0369672	0.519331
gene_2058	-1.32777	1.7077	0.037061	0.519331
gene_8082	0.633608	6.64249	0.037121	0.519331
gene_3513	0.588107	8.47956	0.0371907	0.519331
gene_165	-0.497148	5.92443	0.0372665	0.519331
gene_3200	1.39602	4.19624	0.0373115	0.519331
gene_5622	-1.58497	1.89918	0.0374669	0.519331
gene_4257	0.481378	7.11781	0.0374728	0.519331
gene_4565	-1.49498	1.44203	0.0375057	0.519331
gene_1806	-2.17291	0.354307	0.0376263	0.519331
gene_137	-0.718375	4.6387	0.037634	0.519331
gene_1180	0.675246	7.5122	0.0377778	0.519331
gene_1455	1.54663	1.61919	0.0378701	0.519331
gene_3715	0.592383	5.47076	0.0378715	0.519331
gene_2747	1.12293	3.13968	0.0378785	0.519331
gene_7616	0.516463	5.5878	0.0378977	0.519331
gene_3065	-1.0902	4.48256	0.0379607	0.519331
gene_8595	0.751939	6.46735	0.0384315	0.524403
gene_3877	0.423528	6.53463	0.0384609	0.524403
gene_1661	1.10345	3.34101	0.0388092	0.526874
gene_1997	0.78422	7.45511	0.0388552	0.526874
gene_7043	1.0981	5.651	0.038856	0.526874
gene_6574	0.613305	5.0572	0.0389625	0.526874
gene_6510	0.524779	7.65164	0.0389675	0.526874
gene_1626	0.594769	6.1772	0.0395709	0.533877
gene_7234	1.0055	5.21698	0.0396173	0.533877
gene_4800	-0.901497	4.17978	0.0398558	0.536199
gene_5277	-1.07821	3.53333	0.0401624	0.538426
gene_7114	-1.38314	1.2645	0.0403307	0.538426
gene_6014	0.51698	6.88314	0.0403523	0.538426
gene_2982	-0.737523	6.75909	0.0404098	0.538426
gene_7178	0.721662	4.11523	0.0404184	0.538426
gene_8400	0.463708	5.76442	0.040459	0.538426
gene_6839	0.511405	5.99827	0.0404866	0.538426
gene_2963	0.60544	5.15526	0.04066	0.539844
gene_6944	-2.05985	2.05846	0.0410027	0.543504
gene_8644	0.63067	6.20033	0.0412174	0.545457
gene_242	0.605591	6.07848	0.0414115	0.54614
gene_1254	0.484693	5.80492	0.0415049	0.54614
gene_1253	-1.13029	2.52751	0.0415582	0.54614
gene_1007	-1.12009	5.42184	0.0416018	0.54614
gene_7634	0.697356	4.6164	0.0416062	0.54614
gene_540	1.14355	8.07143	0.0416974	0.546452
gene_7828	1.0724	4.84733	0.0417801	0.54665
gene_343	-0.528783	5.84568	0.0419464	0.547226
gene_848	0.89321	6.52192	0.0419592	0.547226
gene_2678	-2.11339	1.66353	0.0422277	0.549842
gene_6990	-0.618474	4.89568	0.0423079	0.549874
gene_2674	-0.788605	4.75128	0.0423963	0.549874
gene_8370	0.736976	7.5847	0.0425426	0.549874
gene_4822	-0.590194	7.4318	0.0425644	0.549874
gene_4075	1.42932	4.00703	0.0425696	0.549874
gene_8035	0.448709	5.82315	0.0427436	0.551074
gene_5552	0.460734	7.91085	0.0428436	0.551074
gene_2892	0.850281	3.30732	0.0429428	0.551074
gene_5646	-1.07198	4.02131	0.0430886	0.551074
gene_4425	0.619468	9.09233	0.0431943	0.551074
gene_6225	-1.98302	0.422073	0.0431985	0.551074
gene_589	-0.677766	5.16663	0.0434104	0.551074
gene_5160	0.468879	7.13054	0.0434603	0.551074
gene_7953	-1.93651	-0.0304146	0.0434979	0.551074
gene_2262	-0.460931	6.10798	0.0435061	0.551074
gene_7830	0.412877	7.57878	0.0435891	0.551074
gene_1084	0.404799	7.23642	0.0436007	0.551074
gene_4562	0.609471	7.21655	0.043633	0.551074
gene_2269	-0.545469	6.46017	0.0436767	0.551074
gene_7481	-1.66501	2.03239	0.0436831	0.551074
gene_4815	-2.18448	2.99185	0.0438719	0.552594
gene_6757	0.57592	4.487	0.0442701	0.556614
gene_1983	-0.649243	4.66546	0.0443284	0.556614
gene_6035	-1.56783	7.13115	0.0446689	0.559749
gene_2571	-0.622088	4.36842	0.0447163	0.559749
gene_312	-0.612274	5.80875	0.044893	0.561094
gene_1970	0.439941	6.28135	0.0450993	0.562803
gene_8408	-0.682461	5.37585	0.0452569	0.56336
gene_740	-0.483249	5.94728	0.0456297	0.56336
gene_6493	0.929322	5.547	0.0456356	0.56336
gene_491	0.472241	6.83731	0.045675	0.56336
gene_3050	0.517171	6.57918	0.0457003	0.56336
gene_1392	-1.67124	3.62339	0.0457358	0.56336
gene_4393	0.567643	7.04967	0.0457916	0.56336
gene_396	-0.548089	8.27191	0.045822	0.56336
gene_8564	-1.98776	1.12926	0.0458229	0.56336
gene_5140	-0.797379	5.96103	0.0458395	0.56336
gene_5049	-0.746724	3.62283	0.046038	0.564941
gene_5332	1.03713	3.09533	0.0461482	0.565438
gene_1760	0.451931	6.75648	0.0462387	0.56569
gene_1665	1.14439	2.71044	0.0463241	0.56581
gene_4807	-0.731128	5.48871	0.0463882	0.56581
gene_7433	-0.604726	6.43963	0.0465922	0.567444
gene_2435	-0.418463	6.25906	0.0466666	0.567497
gene_7647	0.786699	5.95246	0.0470347	0.570422
gene_3953	-0.668397	4.55713	0.0472314	0.570422
gene_333	-0.645577	7.19996	0.0472586	0.570422
gene_1886	-0.721814	5.31449	0.0473894	0.570422
gene_717	0.451147	5.10395	0.0474351	0.570422
gene_2503	0.520781	6.54733	0.0475682	0.570422
gene_8556	-1.62098	0.9454	0.0476001	0.570422
gene_286	-0.536591	6.02912	0.0476083	0.570422
gene_6563	0.69248	7.1197	0.0476315	0.570422
gene_1779	-1.00471	2.6945	0.0476845	0.570422
gene_4980	0.397256	7.18736	0.0477948	0.570422
gene_2711	0.480934	6.60881	0.0479855	0.570422
gene_7535	0.812493	6.3146	0.0479856	0.570422
gene_2240	-1.17607	3.75228	0.0480577	0.570422
gene_3719	1.32858	2.45461	0.0481182	0.570422
gene_3607	0.461713	6.17268	0.0481284	0.570422
gene_220	1.00331	4.83971	0.0481452	0.570422
gene_7517	1.56174	-0.0255437	0.0481749	0.570422
gene_1343	-0.759608	3.63263	0.0483851	0.571175
gene_8092	1.81066	0.92993	0.0484773	0.571175
gene_188	-0.485621	7.42888	0.0485312	0.571175
gene_4720	-0.613251	5.24672	0.0486657	0.571175
gene_251	1.14306	7.36042	0.0488605	0.571175
gene_6545	-1.83337	0.799613	0.0488738	0.571175
gene_4413	1.27389	4.13891	0.0491079	0.571175
gene_6372	0.538929	8.80798	0.04914	0.571175
gene_7853	-1.16746	7.00578	0.0492342	0.571175
gene_1548	-1.17468	1.64994	0.0493156	0.571175
gene_6534	-1.16284	2.52317	0.049447	0.571175
gene_1452	0.69763	9.05696	0.0494613	0.571175
gene_4264	-0.958113	2.50215	0.0494718	0.571175
gene_1933	-0.795323	4.28205	0.0497421	0.571175
gene_5700	0.477536	4.95057	0.0497729	0.571175
gene_852	-0.483862	7.14357	0.0497894	0.571175
gene_4160	0.685517	4.01312	0.0499906	0.571175
gene_6276	-1.4755	3.83284	0.050045	0.571175
gene_7099	-0.774623	6.98225	0.0500572	0.571175
gene_2041	-0.765834	6.72651	0.0502895	0.571175
gene_5279	-1.36709	1.35284	0.0502976	0.571175
gene_5025	-0.5799	5.62337	0.0503342	0.571175
gene_7075	0.631783	5.65403	0.0503789	0.571175
gene_3697	-1.73376	1.596	0.0504755	0.571175
gene_2881	-0.586075	6.35018	0.0504864	0.571175
gene_4555	0.709534	6.97626	0.0505048	0.571175
gene_3274	0.658324	9.76133	0.0505188	0.571175
gene_2175	-0.464983	5.79661	0.0505236	0.571175
gene_2718	-0.618797	4.62773	0.0505539	0.571175
gene_8039	1.64231	-0.318365	0.0505689	0.571175
gene_4833	-1.42374	5.53595	0.050709	0.571175
gene_6475	-1.3613	1.59756	0.0508086	0.571175
gene_4600	0.815869	8.69769	0.0508458	0.571175
gene_5186	-1.52489	1.15973	0.0508474	0.571175
gene_1059	-0.466216	4.93838	0.0509022	0.571175
gene_7751	1.05983	3.22626	0.050933	0.571175
gene_6551	-1.03917	2.59989	0.0509897	0.571175
gene_7105	0.504402	6.36924	0.0511214	0.571175
gene_6074	0.741238	3.83912	0.0512244	0.571175
gene_598	-0.584433	5.82883	0.0513412	0.571175
gene_2075	0.394871	7.52144	0.0513527	0.571175
gene_3995	0.533101	6.48462	0.0514136	0.571175
gene_3731	-1.29776	5.46661	0.051602	0.571175
gene_3807	1.24152	7.66732	0.051631	0.571175
gene_3735	-0.741644	3.4433	0.0517389	0.571175
gene_3683	0.857618	7.46604	0.0518685	0.571175
gene_6703	-0.919689	3.25605	0.0518788	0.571175
gene_876	-0.836664	3.46068	0.0519389	0.571175
gene_5225	-1.13243	3.4598	0.0521002	0.571175
gene_4222	0.554493	7.40706	0.052218	0.571175
gene_1457	-3.08031	3.96343	0.0522328	0.571175
gene_5080	-0.807093	5.41436	0.0522349	0.571175
gene_1991	0.730167	5.32192	0.0522552	0.571175
gene_426	-1.42957	4.33793	0.0522749	0.571175
gene_5569	-0.56573	4.82707	0.052451	0.571175
gene_3500	0.706357	8.21486	0.0524953	0.571175
gene_7719	1.28139	4.15955	0.0526031	0.571175
gene_1704	-0.956072	2.95692	0.0528359	0.571175
gene_793	-2.14701	1.73781	0.0529006	0.571175
gene_6870	0.790176	4.49951	0.0530253	0.571175
gene_802	-0.605024	5.47545	0.0530713	0.571175
gene_6119	-1.11564	2.10619	0.0531074	0.571175
gene_5441	-1.46998	9.3323	0.0531437	0.571175
gene_6303	-0.601423	5.67198	0.0531788	0.571175
gene_488	-1.147	3.2181	0.0532011	0.571175
gene_7311	0.398918	6.81475	0.0533699	0.571175
gene_408	0.568585	5.34095	0.0533767	0.571175
gene_4953	0.47003	6.73053	0.0535053	0.571175
gene_2090	-0.78999	7.98963	0.0535955	0.571175
gene_7355	0.392683	8.55641	0.0536297	0.571175
gene_5666	-0.59062	4.67582	0.053631	0.571175
gene_1316	-1.07282	2.97887	0.053644	0.571175
gene_684	0.500631	7.99943	0.0536698	0.571175
gene_2514	-0.862447	4.42893	0.0538232	0.571175
gene_5764	-0.763392	5.59322	0.0538339	0.571175
gene_8641	0.454059	7.55387	0.0539644	0.571175
gene_325	-0.784423	6.09732	0.053999	0.571175
gene_1134	-0.404222	5.71692	0.0540541	0.571175
gene_7872	-0.675455	5.03159	0.054117	0.571175
gene_5149	0.537001	5.52806	0.0541537	0.571175
gene_7733	0.454853	9.02721	0.0542001	0.571175
gene_8630	0.576079	4.70209	0.0542852	0.571175
gene_6116	1.42461	5.28316	0.0544749	0.571175
gene_1511	-0.648027	4.83723	0.0546228	0.571175
gene_264	-0.7963	3.59986	0.0546246	0.571175
gene_5731	-0.744996	4.74266	0.0546618	0.571175
gene_6915	1.4494	3.57683	0.0548806	0.571175
gene_7727	0.449651	6.66396	0.0549656	0.571175
gene_7321	0.426877	7.45481	0.0550231	0.571175
gene_4935	-1.58532	7.75212	0.0551778	0.571175
gene_294	-0.984274	2.50923	0.0553878	0.571175
gene_3007	-1.14819	2.77329	0.0554234	0.571175
gene_5131	-0.968388	3.59444	0.0554488	0.571175
gene_4636	-0.926813	4.44903	0.0557203	0.571175
gene_4989	1.44656	2.41064	0.0558183	0.571175
gene_6865	0.553085	4.49877	0.0558473	0.571175
gene_5023	-0.72973	4.17877	0.0558728	0.571175
gene_1642	-0.474387	6.78293	0.0558856	0.571175
gene_8422	0.513779	5.50677	0.0558966	0.571175
gene_1248	-0.51289	4.78126	0.0559034	0.571175
gene_7193	0.574729	6.34679	0.0559223	0.571175
gene_5322	-1.20681	2.12314	0.0559526	0.571175
gene_1827	0.613145	7.30653	0.0560114	0.571175
gene_6769	0.540185	7.13725	0.0560407	0.571175
gene_1900	0.40019	6.67335	0.0561789	0.571175
gene_7922	0.377711	6.66935	0.0561795	0.571175
gene_5625	0.676949	5.69095	0.0561989	0.571175
gene_3468	-0.639192	6.7199	0.0562603	0.571175
gene_7649	0.654941	4.69682	0.0563257	0.571175
gene_3523	-0.524036	5.33549	0.056343	0.571175
gene_1839	0.587376	5.26503	0.0563463	0.571175
gene_1462	0.520812	4.98531	0.0564397	0.571175
gene_2707	0.381045	6.8173	0.0565463	0.571175
gene_4895	0.908472	3.64386	0.0566495	0.571175
gene_2918	-0.831778	3.34932	0.0567198	0.571175
gene_8362	-1.76488	1.02529	0.0567482	0.571175
gene_7820	-0.809556	7.12707	0.0567704	0.571175
gene_6710	0.565252	7.92683	0.0568416	0.571175
gene_2527	1.25858	4.03511	0.0568515	0.571175
gene_2392	1.28918	0.981592	0.0568947	0.571175
gene_8680	-1.9421	0.438018	0.056937	0.571175
gene_3034	0.545016	5.43893	0.0569851	0.571175
gene_2029	-1.24158	2.26325	0.0569938	0.571175
gene_3645	0.426901	6.61303	0.0570211	0.571175
gene_1841	-0.898963	3.10774	0.057054	0.571175
gene_7026	-0.707951	6.52607	0.0571287	0.571216
gene_459	0.638292	4.95633	0.0573296	0.571722
gene_5489	0.460888	5.35846	0.0573405	0.571722
gene_8652	0.616082	6.20019	0.0574688	0.571722
gene_8335	-0.535521	8.13321	0.0575282	0.571722
gene_734	0.456263	6.39714	0.0576061	0.571722
gene_552	-0.682422	4.16939	0.057612	0.571722
gene_6278	0.385137	7.7446	0.0576734	0.571722
gene_600	0.627516	6.55731	0.0577853	0.572131
gene_1967	-0.78224	3.27259	0.0579802	0.572238
gene_7957	-0.890524	3.01138	0.0579932	0.572238
gene_4019	0.620482	7.46712	0.0580279	0.572238
gene_4143	-0.457012	8.16805	0.0580788	0.572238
gene_4693	0.827511	5.36305	0.0582305	0.572283
gene_7053	-0.834857	4.41532	0.0582566	0.572283
gene_3338	-1.85049	-0.136867	0.0582952	0.572283
gene_7143	-0.416659	6.07262	0.0589825	0.577732
gene_869	-0.510356	5.27439	0.0589931	0.577732
gene_8395	-0.640977	3.96916	0.0591356	0.578418
gene_3676	0.448409	7.42555	0.0592059	0.578418
gene_6537	0.891462	2.96147	0.0593485	0.578805
gene_2191	1.97961	0.539635	0.0594301	0.578805
gene_196	-1.348	4.67561	0.0595496	0.578805
gene_5537	0.612275	8.53108	0.0597202	0.578805
gene_3999	0.351241	6.90432	0.0597662	0.578805
gene_5099	0.361343	7.24258	0.0598089	0.578805
gene_6071	0.855769	6.15773	0.0598115	0.578805
gene_1633	0.843039	3.3842	0.0598804	0.578805
gene_6200	-0.891755	3.48206	0.0599412	0.578805
gene_8732	0.693371	5.76008	0.0599886	0.578805
gene_1892	0.551091	7.41097	0.0601065	0.578805
gene_6642	-0.942704	4.22854	0.0601398	0.578805
gene_8125	-1.0779	2.31851	0.0601745	0.578805
gene_2676	-0.48167	6.34934	0.0604122	0.580401
gene_5342	0.460322	5.29647	0.0606021	0.580895
gene_5007	0.50033	6.14193	0.0606412	0.580895
gene_987	-0.847483	3.00826	0.0606787	0.580895
gene_1910	-0.506223	6.8835	0.060891	0.582239
gene_20	0.501134	6.23562	0.0612726	0.583405
gene_7386	1.39868	3.92381	0.0613267	0.583405
gene_7880	-0.85409	4.95328	0.0613518	0.583405
gene_5041	0.767188	3.86273	0.061409	0.583405
gene_8538	0.606762	8.43299	0.061444	0.583405
gene_603	1.17151	2.89209	0.0614578	0.583405
gene_8695	-0.476721	9.19128	0.061542	0.583405
gene_5695	-1.03762	4.39463	0.0615893	0.583405
gene_2102	-0.464975	10.4404	0.0617091	0.583609
gene_5293	0.48797	4.91182	0.0618708	0.583609
gene_6700	0.990906	2.58152	0.0618729	0.583609
gene_4095	-1.89472	0.359178	0.0619087	0.583609
gene_5948	-0.527783	5.87923	0.0619891	0.583609
gene_4759	-0.737484	8.28822	0.0620432	0.583609
gene_1307	0.664378	4.93086	0.0623333	0.583875
gene_1301	0.653053	4.9155	0.0623418	0.583875
gene_5584	0.493786	6.58058	0.0624099	0.583875
gene_6406	-1.56221	2.16185	0.0624341	0.583875
gene_1212	0.695156	7.32595	0.0626558	0.583875
gene_6260	0.712911	3.60087	0.0626726	0.583875
gene_452	0.634832	4.96928	0.062724	0.583875
gene_1032	-0.890306	2.93571	0.0627658	0.583875
gene_4655	-0.968091	3.68368	0.0627876	0.583875
gene_8067	-0.739452	4.05186	0.0629361	0.583875
gene_8478	-1.32637	0.927416	0.0630809	0.583875
gene_2646	0.439838	6.3179	0.063083	0.583875
gene_1046	-0.917107	5.1756	0.0631027	0.583875
gene_6668	0.40217	6.16696	0.0631233	0.583875
gene_3094	-0.719253	6.17004	0.0636985	0.583875
gene_2368	0.478632	5.34287	0.0637572	0.583875
gene_8559	0.542128	9.01386	0.0640744	0.583875
gene_1201	0.842897	8.96073	0.0642297	0.583875
gene_3092	-0.610906	6.08899	0.0643396	0.583875
gene_1908	-0.794687	5.68274	0.0643464	0.583875
gene_4005	0.43591	7.19053	0.0644131	0.583875
gene_621	-0.735946	4.20749	0.0644136	0.583875
gene_1424	0.443713	5.88718	0.0645031	0.583875
gene_4883	-2.26932	1.0664	0.064531	0.583875
gene_2830	1.5945	0.935842	0.0647443	0.583875
gene_2336	-1.68149	0.999188	0.0648276	0.583875
gene_8012	-1.13967	1.86137	0.0648985	0.583875
gene_6156	0.379206	6.63392	0.0649076	0.583875
gene_7845	0.448333	7.49789	0.064956	0.583875
gene_4466	0.7694	7.18855	0.0650255	0.583875
gene_1436	-0.684379	5.47938	0.0650847	0.583875
gene_1121	-0.475701	5.52035	0.0651375	0.583875
gene_7537	0.543386	5.19532	0.0651646	0.583875
gene_6549	1.93341	0.339262	0.0652885	0.583875
gene_4279	-1.23562	1.27846	0.0653049	0.583875
gene_562	0.610181	8.54864	0.0653479	0.583875
gene_5063	0.876963	3.59807	0.0653677	0.583875
gene_8779	-1.37384	2.44385	0.0653747	0.583875
gene_2249	-0.5896	4.24314	0.0655753	0.583875
gene_1686	-0.804967	4.22301	0.0657062	0.583875
gene_3803	0.447911	6.36072	0.0657755	0.583875
gene_5015	0.50595	7.68733	0.0658105	0.583875
gene_214	-0.939948	3.22764	0.0658321	0.583875
gene_3569	-1.11588	2.04078	0.0658425	0.583875
gene_1341	0.387808	8.85972	0.0658716	0.583875
gene_7147	0.421829	6.79297	0.0658986	0.583875
gene_5704	0.5032	5.4021	0.0659261	0.583875
gene_6111	-0.541323	5.35651	0.066278	0.583875
gene_5516	-0.926558	2.56352	0.0663152	0.583875
gene_5978	-0.36106	6.88128	0.0663249	0.583875
gene_8199	0.47425	6.30874	0.0663464	0.583875
gene_319	0.754959	5.83091	0.066382	0.583875
gene_839	0.709356	2.90463	0.0664672	0.583875
gene_2205	-0.576536	5.19341	0.0664875	0.583875
gene_3861	-0.539128	7.34128	0.0667176	0.583875
gene_8356	0.63698	7.90395	0.0667681	0.583875
gene_4159	-2.04189	0.560147	0.0668355	0.583875
gene_7462	-0.435261	5.81534	0.0668706	0.583875
gene_7557	-0.783036	3.28713	0.0668965	0.583875
gene_1218	-1.50142	2.08744	0.066942	0.583875
gene_3730	0.422017	5.16905	0.0669904	0.583875
gene_2632	-1.6435	1.30654	0.0670156	0.583875
gene_5454	-1.507	0.543909	0.0671334	0.583875
gene_3030	1.99269	0.401214	0.0671343	0.583875
gene_7686	-0.494968	7.24071	0.0673149	0.583875
gene_5439	-0.434464	7.73572	0.0674045	0.583875
gene_5221	-0.561855	4.57988	0.0674382	0.583875
gene_169	1.01926	6.13789	0.0675869	0.583875
gene_377	-0.586074	7.61126	0.0675964	0.583875
gene_2870	0.989917	2.37496	0.0676143	0.583875
gene_5772	0.394708	6.11356	0.0677081	0.583875
gene_1148	0.526984	4.43678	0.067768	0.583875
gene_6709	0.461875	7.09733	0.0680245	0.583875
gene_1261	0.434459	7.06443	0.068035	0.583875
gene_7003	0.437112	6.31703	0.0683169	0.583875
gene_1863	1.12856	4.02933	0.0683678	0.583875
gene_281	-0.735953	4.31243	0.0683913	0.583875
gene_3304	-0.513579	4.9364	0.0684567	0.583875
gene_2749	-1.48212	1.0681	0.0684767	0.583875
gene_8217	0.404379	5.98966	0.0685058	0.583875
gene_8163	0.408966	7.39979	0.0685773	0.583875
gene_8134	-0.830777	3.41597	0.0685992	0.583875
gene_7360	0.624483	3.06281	0.0686209	0.583875
gene_1219	1.27911	2.25525	0.0688341	0.583875
gene_1075	0.71172	7.14233	0.0689489	0.583875
gene_8841	-0.846615	9.08162	0.0689724	0.583875
gene_2356	-0.760383	4.96753	0.0689992	0.583875
gene_5717	0.369398	7.2018	0.069006	0.583875
gene_2363	-1.01835	2.68825	0.06911	0.583875
gene_1004	-0.378704	5.87269	0.0691751	0.583875
gene_2695	-1.13315	3.29833	0.0692003	0.583875
gene_2516	-0.5362	8.02084	0.0692225	0.583875
gene_3159	1.34119	1.4297	0.0692406	0.583875
gene_7093	-0.587618	5.57741	0.0692878	0.583875
gene_3093	-0.457203	6.18417	0.0693657	0.583875
gene_3826	0.428634	6.7144	0.0694847	0.583875
gene_2254	0.684372	5.70994	0.0695474	0.583875
gene_6632	-2.01217	8.94201	0.0695869	0.583875
gene_3017	0.360167	7.3635	0.0697054	0.583875
gene_7878	0.44456	7.82755	0.0697141	0.583875
gene_8364	-1.21705	1.80002	0.0697519	0.583875
gene_3979	-0.734821	5.76243	0.0697528	0.583875
gene_8415	-0.49643	7.52453	0.0697601	0.583875
gene_1577	-0.977074	3.43258	0.0698695	0.583875
gene_7392	-0.674878	4.53979	0.0699267	0.583875
gene_971	-0.588412	5.52346	0.0699861	0.583875
gene_6938	-1.33247	1.26726	0.0700214	0.583875
gene_8633	0.687008	6.67497	0.0700262	0.583875
gene_8245	-0.558289	5.88305	0.0700771	0.583875
gene_3718	1.66458	0.971756	0.0700809	0.583875
gene_3610	-0.883222	2.45065	0.0701446	0.583875
gene_3815	1.82424	-0.70866	0.0701457	0.583875
gene_1820	-0.507202	4.9989	0.070275	0.583931
gene_6424	-0.961488	3.74152	0.0704179	0.583931
gene_3834	0.577674	5.24531	0.0704343	0.583931
gene_6903	-1.01905	2.67929	0.0704409	0.583931
gene_3158	0.551951	6.41708	0.0705624	0.584341
gene_6583	-0.62243	4.57586	0.0707337	0.585161
gene_5637	1.69094	0.368545	0.0708864	0.585166
gene_3938	-0.577094	4.54746	0.0709117	0.585166
gene_3521	-0.728381	8.36463	0.0710056	0.585166
gene_3382	0.53851	6.61151	0.0712053	0.585166
gene_8586	-1.11062	5.76747	0.0712352	0.585166
gene_4849	0.878635	5.19371	0.0713169	0.585166
gene_7691	-0.441744	5.29654	0.0713553	0.585166
gene_8645	-1.60235	1.61635	0.0713748	0.585166
gene_5205	-1.90324	0.856935	0.0713846	0.585166
gene_4109	-0.636038	5.58997	0.0715095	0.585549
gene_1234	0.571936	6.76292	0.0716275	0.585549
gene_6259	-0.640311	6.52128	0.0716482	0.585549
gene_5630	-1.9898	1.68045	0.0717305	0.585631
gene_4743	0.646754	6.84612	0.0720474	0.585753
gene_2758	0.529673	5.67537	0.072131	0.585753
gene_759	0.834588	7.06541	0.0721475	0.585753
gene_4994	-0.596187	5.1386	0.0721888	0.585753
gene_6386	-0.510011	6.24271	0.0722471	0.585753
gene_4691	-0.855693	4.91585	0.0723105	0.585753
gene_2563	-1.62738	0.929228	0.0724165	0.585753
gene_1266	-0.945525	3.3709	0.0724281	0.585753
gene_879	-0.720434	11.0956	0.0724515	0.585753
gene_231	0.631662	5.26313	0.0724687	0.585753
gene_2865	-0.577677	5.84579	0.0725598	0.585904
gene_5096	-0.926695	4.85203	0.0727909	0.587107
gene_5557	-0.735494	6.9168	0.0729226	0.587107
gene_7349	0.502039	9.29701	0.0729817	0.587107
gene_4200	0.435419	6.45547	0.0730401	0.587107
gene_4322	0.798739	3.76798	0.0730712	0.587107
gene_2815	0.398305	6.77992	0.0731619	0.587253
gene_5000	-0.903016	7.7704	0.073298	0.587763
gene_2095	1.1266	5.80388	0.0735462	0.588354
gene_3056	-0.326004	7.89656	0.0735545	0.588354
gene_7890	0.445972	6.89486	0.0735897	0.588354
gene_2374	-0.676757	3.73008	0.0738234	0.589553
gene_3080	-0.355166	7.17775	0.0739202	0.589553
gene_1792	-0.548442	5.13459	0.074065	0.589553
gene_695	-0.471289	5.97221	0.0741479	0.589553
gene_1282	-0.871533	5.39061	0.0741887	0.589553
gene_5493	-0.601766	4.12105	0.0742573	0.589553
gene_8411	0.384283	6.16239	0.0742819	0.589553
gene_4794	-0.428257	10.0307	0.0746616	0.589553
gene_3863	-0.421874	5.90623	0.074668	0.589553
gene_5994	-1.23704	2.64422	0.0747804	0.589553
gene_6087	-0.929769	5.0816	0.0747831	0.589553
gene_3520	-0.705327	4.89582	0.0748216	0.589553
gene_3530	0.414117	6.82536	0.0748259	0.589553
gene_4507	-0.58813	4.94264	0.0748743	0.589553
gene_8409	1.27763	2.32682	0.075047	0.589553
gene_2607	-1.74159	0.949538	0.0750987	0.589553
gene_6382	-0.880551	4.88501	0.0751825	0.589553
gene_7546	-1.17581	2.09844	0.0751877	0.589553
gene_2802	0.669265	3.8559	0.075235	0.589553
gene_6305	-0.351686	7.85879	0.0753703	0.589553
gene_2002	-1.15078	2.01624	0.0754128	0.589553
gene_5590	-0.684838	4.49389	0.0754782	0.589553
gene_261	1.22173	2.67752	0.075527	0.589553
gene_3124	0.408078	8.1542	0.0755846	0.589553
gene_4689	-0.377076	5.98074	0.0756072	0.589553
gene_222	0.58199	7.84159	0.0756322	0.589553
gene_8325	-0.71586	5.67961	0.0758558	0.589941
gene_3737	0.521352	5.05506	0.0758994	0.589941
gene_4949	0.429952	6.6302	0.0759876	0.589941
gene_1312	1.77347	0.261618	0.0761221	0.589941
gene_5982	-0.770964	3.45917	0.0763029	0.589941
gene_5559	0.490934	7.70031	0.076318	0.589941
gene_2137	-0.761713	3.5761	0.0764522	0.589941
gene_6378	-0.631826	4.59301	0.0765339	0.589941
gene_6659	-0.846322	2.59638	0.0765587	0.589941
gene_7680	-1.48049	-0.416627	0.0765692	0.589941
gene_3306	0.464549	9.04466	0.0767294	0.589941
gene_913	0.55751	5.77092	0.0768604	0.589941
gene_376	0.647273	6.58332	0.0770325	0.589941
gene_4356	0.687387	7.1756	0.0770609	0.589941
gene_3125	0.578198	5.51978	0.0771091	0.589941
gene_4741	-0.670468	5.02146	0.0771376	0.589941
gene_5640	1.77284	0.395677	0.0771545	0.589941
gene_1582	0.746415	4.74949	0.0772626	0.589941
gene_2956	-0.48912	5.06114	0.0773502	0.589941
gene_938	-0.621303	6.12005	0.0773868	0.589941
gene_4414	0.686126	5.38457	0.0774531	0.589941
gene_1088	-0.540127	6.23405	0.0774676	0.589941
gene_4147	-1.00016	2.42502	0.0774727	0.589941
gene_3227	-0.899744	6.53444	0.0774961	0.589941
gene_4577	0.340023	6.85876	0.0775226	0.589941
gene_7576	0.43554	5.49348	0.0776463	0.589941
gene_2166	0.402643	8.0378	0.0777334	0.589941
gene_147	-0.606023	4.48074	0.077771	0.589941
gene_5259	0.844896	3.91323	0.0777944	0.589941
gene_498	-1.17784	2.72859	0.0779237	0.590369
gene_4312	-0.471567	6.64072	0.0781438	0.591435
gene_2403	0.976117	5.27642	0.0783224	0.591435
gene_7814	-0.801792	4.80631	0.0784024	0.591435
gene_8552	1.17812	2.06443	0.0784554	0.591435
gene_8456	0.47351	6.34219	0.0784904	0.591435
gene_4070	-1.38551	1.90226	0.0785999	0.591435
gene_5651	-0.373449	6.01658	0.078674	0.591435
gene_477	0.631839	6.03568	0.0787232	0.591435
gene_5943	-1.05654	2.48319	0.0787399	0.591435
gene_8274	-1.32593	1.79472	0.0787947	0.591435
gene_6951	0.660175	5.7481	0.0789758	0.591714
gene_4770	-0.551386	4.32993	0.0792311	0.591714
gene_4991	0.391056	6.65482	0.0792369	0.591714
gene_3872	-0.389416	6.85892	0.0792534	0.591714
gene_5996	0.686048	5.99171	0.0793086	0.591714
gene_5501	-0.501166	7.32947	0.0793513	0.591714
gene_570	0.46673	7.10187	0.0793699	0.591714
gene_6435	-1.08393	2.52386	0.0794164	0.591714
gene_6817	0.530793	4.40535	0.0796434	0.59286
gene_2121	-0.924262	3.58127	0.0798594	0.593314
gene_1101	-0.518337	5.58947	0.0799818	0.593314
gene_3111	0.498329	6.92074	0.0799977	0.593314
gene_3402	0.996279	1.15451	0.0802979	0.593314
gene_6033	0.638832	4.42607	0.0803069	0.593314
gene_1454	0.333196	6.43553	0.080362	0.593314
gene_370	0.607196	5.72411	0.0803687	0.593314
gene_6108	0.371414	6.62397	0.0804915	0.593314
gene_7867	-1.65296	1.21465	0.0807798	0.593314
gene_5068	1.11989	7.02176	0.0807871	0.593314
gene_5835	0.522088	7.54207	0.0808202	0.593314
gene_1284	0.742183	3.88847	0.0808879	0.593314
gene_3188	0.358468	6.66062	0.0810204	0.593314
gene_1699	2.10276	1.36301	0.0810746	0.593314
gene_2613	-0.757124	7.7464	0.0812881	0.593314
gene_4251	0.441672	6.28555	0.081316	0.593314
gene_4826	-1.64139	-0.131208	0.0813663	0.593314
gene_5079	0.425338	6.56027	0.0814249	0.593314
gene_2387	0.361156	6.51012	0.081525	0.593314
gene_5284	0.460426	7.25415	0.081541	0.593314
gene_8759	-0.812945	5.32201	0.0815816	0.593314
gene_4988	0.365288	7.16689	0.0817194	0.593314
gene_246	-1.31867	0.821906	0.0817466	0.593314
gene_4706	0.674996	5.48369	0.0817724	0.593314
gene_5857	0.440361	7.71678	0.0817759	0.593314
gene_2886	-1.7519	1.89118	0.0817836	0.593314
gene_7038	-1.49925	0.7179	0.0818319	0.593314
gene_2642	0.564003	6.71127	0.0818632	0.593314
gene_6749	-1.48049	-0.156168	0.0818652	0.593314
gene_5436	-0.750429	6.47859	0.081964	0.593314
gene_4828	-1.71482	2.58477	0.0819754	0.593314
gene_5350	-0.513226	5.07888	0.0822217	0.594242
gene_3930	0.63521	4.27748	0.0824029	0.594242
gene_4707	-1.2225	1.38275	0.0824527	0.594242
gene_1747	0.482756	7.40736	0.0824868	0.594242
gene_1471	1.11579	3.08872	0.0825243	0.594242
gene_6793	-1.83929	-0.399858	0.0827289	0.594242
gene_4844	0.549961	10.1901	0.0828399	0.594242
gene_4373	-0.499634	6.11718	0.0828743	0.594242
gene_6484	0.433822	5.33539	0.0830035	0.594242
gene_4007	0.529814	4.37852	0.0830257	0.594242
gene_5006	0.619947	3.68321	0.0830644	0.594242
gene_7468	0.958057	3.58959	0.0832401	0.594242
gene_4886	-0.467812	6.7587	0.0832507	0.594242
gene_1045	0.664141	6.02764	0.0833714	0.594242
gene_386	-0.589683	6.6655	0.0834303	0.594242
gene_8176	0.370499	8.04542	0.0835204	0.594242
gene_4719	0.390946	5.84036	0.0835309	0.594242
gene_2025	-0.525623	4.95454	0.0835786	0.594242
gene_7485	-1.20013	2.07042	0.0837377	0.594242
gene_3337	0.844658	5.59906	0.0837525	0.594242
gene_3508	0.93274	5.02552	0.0837948	0.594242
gene_6123	-0.616825	5.1315	0.0838043	0.594242
gene_1593	0.499821	5.26809	0.0838116	0.594242
gene_5141	-0.628325	5.71877	0.0839339	0.594242
gene_8670	-0.929713	8.52477	0.0839379	0.594242
gene_8867	-0.462863	4.9447	0.0840557	0.594363
gene_2420	-0.648949	4.23473	0.0841805	0.594363
gene_8761	0.579499	6.18538	0.0843518	0.594363
gene_7130	-0.675243	3.08043	0.0844629	0.594363
gene_7676	-0.966625	3.01803	0.0844814	0.594363
gene_4235	-1.26396	-0.424029	0.0844885	0.594363
gene_4350	0.440758	6.6327	0.0845851	0.594363
gene_5117	0.735724	2.94326	0.0846395	0.594363
gene_6937	0.630658	4.34638	0.0846989	0.594363
gene_3168	0.681134	7.70443	0.0847105	0.594363
gene_7420	-1.5885	1.21405	0.0847623	0.594363
gene_7407	0.4063	5.61879	0.0848804	0.594388
gene_5037	1.02349	3.78212	0.0849126	0.594388
gene_1173	0.372215	7.35723	0.0852688	0.594526
gene_6834	0.346367	7.36775	0.0853273	0.594526
gene_5787	0.589326	4.5426	0.085369	0.594526
gene_6318	-0.580777	6.44254	0.0853814	0.594526
gene_6726	1.17019	2.79985	0.0853983	0.594526
gene_7490	0.467672	4.65412	0.0855305	0.594526
gene_454	-1.74343	0.0727183	0.0856233	0.594526
gene_7791	-0.375564	7.31227	0.0856573	0.594526
gene_4491	-1.38275	0.583247	0.0857261	0.594526
gene_3655	-1.36775	4.30581	0.0857643	0.594526
gene_1965	1.81075	0.938428	0.0859138	0.594526
gene_3139	1.63081	0.506571	0.0859281	0.594526
gene_7007	1.369	6.34391	0.0859903	0.594526
gene_173	0.933058	5.9239	0.0860447	0.594526
gene_8836	0.431457	9.07121	0.0860563	0.594526
gene_7840	0.545208	4.8081	0.0861068	0.594526
gene_3471	-0.542594	8.47955	0.0862234	0.594824
gene_39	-1.49644	2.31292	0.0863923	0.595482
gene_2916	0.690184	6.60246	0.0864793	0.595575
gene_6041	0.973229	6.09007	0.0869315	0.597531
gene_3490	0.573764	9.2953	0.0869707	0.597531
gene_7108	0.353221	5.80324	0.0869868	0.597531
gene_6813	0.48144	7.57889	0.087127	0.597531
gene_4315	1.32246	5.38328	0.0871888	0.597531
gene_710	0.6036	5.74269	0.0872524	0.597531
gene_7601	-0.49348	7.68941	0.0873726	0.597531
gene_2217	-1.25211	2.89333	0.0874617	0.597531
gene_1402	1.03266	2.56318	0.087484	0.597531
gene_4447	0.460691	5.16948	0.0875012	0.597531
gene_6567	-0.583056	4.51857	0.0875864	0.597609
gene_7999	0.414413	8.49749	0.0876923	0.597828
gene_5326	-0.701862	5.67646	0.087766	0.597828
gene_4000	-0.373155	5.58185	0.0878941	0.598101
gene_919	1.01638	2.88624	0.0880254	0.598101
gene_3650	-0.673111	4.97155	0.0880421	0.598101
gene_4389	0.412637	7.67345	0.0881015	0.598101
gene_4422	1.63762	0.610012	0.0884291	0.598404
gene_618	0.672236	6.83984	0.0885127	0.598404
gene_8265	-1.41916	-0.261832	0.088703	0.598404
gene_5975	-0.954596	2.74253	0.0887211	0.598404
gene_743	0.732613	3.99478	0.088772	0.598404
gene_7018	-0.605651	5.6741	0.088856	0.598404
gene_6187	0.777276	6.17308	0.0888707	0.598404
gene_1956	-1.1793	1.84529	0.0888783	0.598404
gene_5896	0.329565	7.26768	0.0890265	0.598404
gene_3572	0.522084	4.76558	0.0890339	0.598404
gene_5051	-0.847035	3.95557	0.0890709	0.598404
gene_3956	-0.706323	4.71058	0.0893075	0.598404
gene_4556	0.746748	3.96162	0.0893504	0.598404
gene_5843	-0.627214	3.70418	0.0893622	0.598404
gene_5883	-0.517127	5.74768	0.0893821	0.598404
gene_8821	0.63077	7.56598	0.0894404	0.598404
gene_1884	-1.48049	-0.448989	0.0896665	0.598404
gene_2792	-1.40772	-0.128202	0.0897347	0.598404
gene_2954	-0.411315	7.08899	0.0897842	0.598404
gene_5855	-0.588999	4.1837	0.0899175	0.598404
gene_8606	0.601365	4.72411	0.0899966	0.598404
gene_5392	1.64403	-0.429688	0.0900746	0.598404
gene_4390	0.641271	5.67708	0.0901117	0.598404
gene_7980	0.564996	6.18017	0.0903395	0.598404
gene_1576	-0.478329	5.40108	0.0903456	0.598404
gene_7607	-0.677528	4.92157	0.090418	0.598404
gene_127	1.45594	3.4339	0.0904255	0.598404
gene_6962	0.610889	6.17435	0.0905897	0.598404
gene_4725	-0.388788	8.61853	0.0906044	0.598404
gene_4737	-1.51859	1.7859	0.0906362	0.598404
gene_3889	-1.10787	5.78808	0.0906658	0.598404
gene_7034	-1.47623	1.39068	0.0907435	0.598404
gene_2644	-0.572574	5.28679	0.0907787	0.598404
gene_1080	0.355605	6.72648	0.0908188	0.598404
gene_276	-0.815161	4.67007	0.0908983	0.598404
gene_4575	-0.967117	4.89864	0.0909261	0.598404
gene_8261	-0.404855	6.10483	0.0910094	0.598404
gene_5305	1.38158	-0.0337342	0.0910191	0.598404
gene_1868	0.48243	8.82178	0.0910787	0.598404
gene_8551	0.700426	7.22174	0.0911249	0.598404
gene_7782	0.501134	5.38615	0.0911756	0.598404
gene_4664	-0.408513	5.2877	0.0913888	0.598507
gene_1601	-0.434259	6.74269	0.0915942	0.598507
gene_905	0.82554	4.78479	0.0916153	0.598507
gene_6392	-0.332174	8.41239	0.0918669	0.598507
gene_5940	0.489218	5.87046	0.0919242	0.598507
gene_1396	0.739832	5.27034	0.0919429	0.598507
gene_5987	0.576758	5.49158	0.0919826	0.598507
gene_1964	-0.860927	3.9268	0.0921943	0.598507
gene_551	-0.325483	6.39274	0.0923284	0.598507
gene_8338	-0.998242	1.56172	0.0923337	0.598507
gene_7821	0.365973	7.33869	0.0923559	0.598507
gene_2475	-0.715449	3.65913	0.0923959	0.598507
gene_2505	0.472884	7.20289	0.0924044	0.598507
gene_4773	-1.03539	2.16646	0.0925682	0.598507
gene_3987	0.319658	6.80231	0.0927613	0.598507
gene_8510	-0.533763	5.2439	0.0930648	0.598507
gene_7813	-0.498301	5.20526	0.0930972	0.598507
gene_7735	0.447056	7.36037	0.0932071	0.598507
gene_8141	-0.701739	4.17779	0.0932698	0.598507
gene_1211	1.07225	0.0551607	0.0935102	0.598507
gene_4998	-1.06019	4.47533	0.0935222	0.598507
gene_3635	-0.972279	4.18309	0.0935976	0.598507
gene_2393	-0.324826	7.32125	0.093621	0.598507
gene_8066	-0.512514	4.79494	0.093697	0.598507
gene_2144	-1.44315	1.56219	0.0937203	0.598507
gene_4790	-1.55559	0.907502	0.0937762	0.598507
gene_860	-2.05921	1.11527	0.0938093	0.598507
gene_7306	0.62602	5.88907	0.0938846	0.598507
gene_7331	-1.11108	2.41697	0.0938935	0.598507
gene_5800	0.618699	4.71074	0.0940641	0.598507
gene_792	-0.758948	7.1314	0.0940783	0.598507
gene_5081	0.290711	7.08411	0.0940884	0.598507
gene_8117	-1.58745	1.418	0.0942451	0.598507
gene_784	0.477958	6.71227	0.0943911	0.598507
gene_6860	1.44447	5.38597	0.0944374	0.598507
gene_1679	0.359807	8.49969	0.0944578	0.598507
gene_1283	-0.744992	4.06747	0.0945525	0.598507
gene_3144	-1.08871	1.9295	0.0947261	0.598507
gene_2003	-1.8758	0.424956	0.0947863	0.598507
gene_807	1.3911	-0.424029	0.0948955	0.598507
gene_4023	-0.71114	6.0754	0.0949203	0.598507
gene_6054	-1.34477	2.17136	0.0949333	0.598507
gene_3155	-0.522479	5.58175	0.0949355	0.598507
gene_3664	-0.942176	2.33728	0.0949665	0.598507
gene_3775	-0.425075	6.52575	0.0950395	0.598507
gene_357	0.347469	6.34863	0.0950551	0.598507
gene_7656	-0.364285	5.83766	0.0951644	0.598507
gene_4999	-1.68516	0.494352	0.0951998	0.598507
gene_7438	0.433849	6.45219	0.0952712	0.598507
gene_421	0.50023	7.61392	0.0953028	0.598507
gene_7501	-1.46724	1.0296	0.0953089	0.598507
gene_506	-1.45751	0.586253	0.0953178	0.598507
gene_6479	-0.435822	4.78339	0.0953316	0.598507
gene_1176	0.984345	2.01061	0.0953347	0.598507
gene_3260	0.418633	5.45189	0.0953612	0.598507
gene_6240	-1.01159	1.67858	0.0953989	0.598507
gene_6939	0.600035	4.96598	0.0954034	0.598507
gene_5237	0.631487	4.42071	0.0955048	0.598679
gene_2766	0.559938	7.38395	0.0957932	0.599668
gene_5869	-1.60712	2.16578	0.0958106	0.599668
gene_781	-0.912503	5.28537	0.0960085	0.600396
gene_7758	-0.455055	6.22523	0.0962287	0.600396
gene_7239	-0.524884	5.79877	0.0963536	0.600396
gene_6019	-0.63122	5.82736	0.096384	0.600396
gene_5950	-0.597676	4.48626	0.0964158	0.600396
gene_6864	0.660149	3.1713	0.0964557	0.600396
gene_278	-1.00862	2.15193	0.0965837	0.600396
gene_4202	1.55763	6.82235	0.0965944	0.600396
gene_7969	0.690157	3.89394	0.0966047	0.600396
gene_4418	0.443302	6.29944	0.0966683	0.600396
gene_7611	-0.890048	5.00819	0.0968643	0.601152
gene_6766	-0.446778	5.82791	0.097042	0.601551
gene_4599	-0.526474	4.47903	0.0971858	0.601551
gene_2744	-0.790732	8.29121	0.0974393	0.601551
gene_1097	-0.40485	5.48916	0.0974551	0.601551
gene_4183	-0.435822	5.28762	0.097507	0.601551
gene_3447	-1.36021	1.86393	0.0976496	0.601551
gene_3097	-0.812162	6.52054	0.09769	0.601551
gene_1000	0.392167	6.90655	0.0977388	0.601551
gene_7638	-0.727741	2.9127	0.097739	0.601551
gene_5168	-1.80404	0.718619	0.0977578	0.601551
gene_3066	-0.845602	2.7925	0.0980645	0.601551
gene_103	-0.584389	5.06649	0.0980685	0.601551
gene_7129	0.663792	6.01316	0.0981203	0.601551
gene_7571	-1.04448	2.79975	0.0982125	0.601551
gene_3101	-0.444573	7.77859	0.098236	0.601551
gene_2481	0.658455	3.73222	0.0982522	0.601551
gene_4701	-1.48049	-0.131208	0.0982788	0.601551
gene_7397	-1.19946	2.54185	0.0983268	0.601551
gene_554	-1.80684	0.101543	0.0983398	0.601551
gene_5730	-0.489193	4.85644	0.0984255	0.601621
gene_3333	-0.397064	6.99323	0.0985545	0.601879
gene_1677	-0.917617	8.95831	0.0986248	0.601879
gene_579	0.460825	6.24464	0.0987197	0.601879
gene_2731	1.29144	4.94952	0.0988775	0.601879
gene_838	-1.73183	-0.225762	0.0989957	0.601879
gene_7202	-0.474612	5.73949	0.0992446	0.601879
gene_8621	-0.520257	5.08277	0.0993104	0.601879
gene_7694	0.533148	4.94032	0.0994161	0.601879
gene_4056	-0.361086	6.17519	0.0995078	0.601879
gene_1360	0.753477	5.085	0.0995133	0.601879
gene_4959	0.328212	6.6229	0.0995344	0.601879
gene_115	0.493427	4.77819	0.0996107	0.601879
gene_5256	0.480041	5.48019	0.0996495	0.601879
gene_3012	0.327034	7.97568	0.099689	0.601879
gene_3396	1.39213	0.836539	0.0999265	0.601879
gene_3421	0.967183	1.73721	0.0999319	0.601879
gene_7559	-0.33235	6.32152	0.0999413	0.601879
gene_7479	-0.614017	7.7526	0.100027	0.601879
gene_5533	-0.969167	4.07869	0.10005	0.601879
gene_7336	-0.714407	3.67386	0.100164	0.601879
gene_5377	0.401728	5.47612	0.100214	0.601879
gene_3870	-0.957397	4.84077	0.100224	0.601879
gene_4681	-0.568093	4.85948	0.10025	0.601879
gene_4548	-1.08459	2.32587	0.100251	0.601879
gene_5624	0.575496	6.7307	0.100482	0.60282
gene_6847	0.424222	5.03358	0.100686	0.60347
gene_7594	-0.811887	6.86626	0.10085	0.60347
gene_6202	0.71029	4.84044	0.100894	0.60347
gene_4734	0.365816	6.79172	0.100976	0.60347
gene_8009	-0.77582	2.26459	0.101022	0.60347
gene_7109	-0.737953	3.57013	0.101135	0.60347
gene_4262	0.353357	5.68794	0.101141	0.60347
gene_2478	-1.11064	3.40381	0.101246	0.60347
gene_3236	-0.603391	5.17843	0.101261	0.60347
gene_6389	0.392387	7.24984	0.101594	0.604563
gene_2046	0.791443	4.04019	0.101633	0.604563
gene_6145	0.882063	2.95098	0.101669	0.604563
gene_5223	-0.420464	7.49107	0.101862	0.604652
gene_2100	1.36015	9.69142	0.101868	0.604652
gene_2162	1.52657	2.61353	0.102014	0.604652
gene_1643	0.389915	5.63495	0.102037	0.604652
gene_5685	-1.74866	0.527615	0.102086	0.604652
gene_827	-0.642074	4.11121	0.10217	0.604652
gene_4879	-0.652224	5.45243	0.102271	0.604652
gene_5601	0.734504	6.28725	0.102281	0.604652
gene_7504	-0.939027	5.43388	0.102422	0.605045
gene_2246	0.812522	7.72709	0.102792	0.60679
gene_5417	1.31777	1.30041	0.102955	0.607107
gene_6918	0.404404	10.5172	0.102996	0.607107
gene_1057	0.451451	6.92769	0.103404	0.607364
gene_1893	0.660422	3.93951	0.103516	0.607364
gene_5201	0.39736	7.42883	0.103762	0.607364
gene_3353	0.348611	6.4812	0.103825	0.607364
gene_8174	-0.984121	2.61492	0.103991	0.607364
gene_4284	1.63998	1.57947	0.104008	0.607364
gene_2355	-0.443703	7.51514	0.104111	0.607364
gene_3709	-0.811658	6.94474	0.104143	0.607364
gene_2268	0.393382	4.78055	0.104149	0.607364
gene_920	-1.53381	0.0428877	0.104309	0.607364
gene_8057	0.513663	6.3396	0.104484	0.607364
gene_3394	1.60356	0.636721	0.104533	0.607364
gene_5072	1.62947	-0.40726	0.10455	0.607364
gene_6256	-1.28575	3.15779	0.104717	0.607364
gene_1743	-1.13181	3.32638	0.104868	0.607364
gene_74	0.786594	6.72783	0.104939	0.607364
gene_5475	-0.447522	4.44284	0.104984	0.607364
gene_7259	0.432116	6.74628	0.104992	0.607364
gene_7708	-0.467229	5.09047	0.105072	0.607364
gene_178	1.28786	8.57285	0.105114	0.607364
gene_5070	0.81201	5.69664	0.105272	0.607364
gene_7150	-0.504259	5.09564	0.10531	0.607364
gene_8801	-0.398144	5.95921	0.105338	0.607364
gene_3373	0.442816	8.04358	0.105338	0.607364
gene_2219	1.06497	2.79039	0.105367	0.607364
gene_7301	-0.54521	5.91315	0.105397	0.607364
gene_7556	-0.564263	5.39385	0.105502	0.607364
gene_651	-0.528659	7.89327	0.105507	0.607364
gene_299	0.397474	5.91172	0.105576	0.607364
gene_3454	1.06502	2.45771	0.105649	0.607364
gene_7930	0.434898	6.16271	0.105839	0.607364
gene_3268	0.457131	7.10829	0.105895	0.607364
gene_8705	1.62947	-0.660317	0.105941	0.607364
gene_8602	1.04504	1.97128	0.105945	0.607364
gene_5593	0.59076	5.01027	0.106148	0.607364
gene_6758	0.590392	4.30302	0.1062	0.607364
gene_1228	-0.437499	5.10542	0.106216	0.607364
gene_3903	0.409271	7.15024	0.106246	0.607364
gene_899	0.354131	6.22512	0.106315	0.607364
gene_3179	-1.48408	0.378479	0.10635	0.607364
gene_5933	0.570775	4.35867	0.106498	0.607364
gene_639	-1.61094	0.372153	0.106688	0.607364
gene_8080	-0.587271	5.5366	0.106706	0.607364
gene_5692	1.63433	-0.45386	0.106725	0.607364
gene_5183	0.580473	5.85242	0.106789	0.607364
gene_8044	-0.466262	5.83378	0.106827	0.607364
gene_2959	-0.634767	8.1973	0.106932	0.607364
gene_2098	0.825441	4.57919	0.10699	0.607364
gene_1387	0.708339	4.98768	0.107002	0.607364
gene_4153	-0.697916	6.2757	0.10709	0.607364
gene_236	-0.459409	4.86235	0.107203	0.607364
gene_692	-0.932841	9.46959	0.10732	0.607364
gene_1447	0.94181	6.95194	0.107326	0.607364
gene_934	-0.856694	3.33295	0.10736	0.607364
gene_7555	-0.550405	6.05691	0.107374	0.607364
gene_7954	-0.758604	2.90135	0.107414	0.607364
gene_7761	0.788581	5.56045	0.107456	0.607364
gene_1157	-1.30052	0.851897	0.107474	0.607364
gene_8850	1.08877	3.23995	0.107558	0.607364
gene_2280	-0.443803	4.80591	0.107651	0.607364
gene_56	1.16454	7.82868	0.107678	0.607364
gene_8525	0.842933	3.42934	0.107689	0.607364
gene_1348	0.43033	6.43087	0.107798	0.607555
gene_6384	0.365982	9.40995	0.107905	0.607735
gene_4973	-0.835933	4.39492	0.108182	0.608461
gene_1321	0.402499	6.90804	0.108234	0.608461
gene_2399	0.427723	4.73221	0.108259	0.608461
gene_771	0.346451	6.27388	0.108423	0.608959
gene_6751	-0.640031	5.79176	0.108962	0.609256
gene_537	0.634015	6.28925	0.109071	0.609256
gene_227	0.697183	3.32575	0.109228	0.609256
gene_4944	-0.582724	8.48836	0.109465	0.609256
gene_6152	0.574601	5.55841	0.109517	0.609256
gene_8019	0.497858	4.47866	0.109595	0.609256
gene_7428	0.975994	1.34757	0.109717	0.609256
gene_1290	-0.418872	5.14486	0.109764	0.609256
gene_3070	0.367302	8.06599	0.109799	0.609256
gene_4110	0.899539	3.42598	0.109903	0.609256
gene_4337	-0.753947	4.08444	0.10995	0.609256
gene_1327	-0.590753	5.69612	0.109977	0.609256
gene_6560	-1.00848	3.2745	0.109991	0.609256
gene_6597	0.41034	6.19136	0.11003	0.609256
gene_5997	0.408792	6.13126	0.110083	0.609256
gene_2027	-1.5462	1.37583	0.110141	0.609256
gene_2215	-0.877416	4.30979	0.110197	0.609256
gene_1137	1.14745	4.48034	0.110207	0.609256
gene_7022	-0.535404	4.82288	0.110208	0.609256
gene_3868	-0.591005	4.12056	0.110269	0.609256
gene_8716	-0.719872	8.8414	0.110327	0.609256
gene_538	-0.701455	7.67695	0.110371	0.609256
gene_8158	0.573353	9.63172	0.110429	0.609256
gene_3115	-0.649581	4.61677	0.110437	0.609256
gene_903	0.345779	5.61756	0.110446	0.609256
gene_4016	0.436678	5.69322	0.110551	0.609256
gene_7654	-1.11322	6.06501	0.110563	0.609256
gene_4449	-0.782028	2.94596	0.110582	0.609256
gene_282	0.715263	3.09326	0.110831	0.60934
gene_4185	-1.59205	-0.470629	0.110903	0.60934
gene_7175	-0.393156	6.64105	0.111079	0.60934
gene_8486	-1.25178	4.04645	0.11111	0.60934
gene_3700	-1.35588	0.562316	0.111169	0.60934
gene_5394	-1.58992	0.131783	0.111303	0.60934
gene_5508	0.539939	5.29195	0.111344	0.60934
gene_8727	1.14204	0.10508	0.111351	0.60934
gene_3575	-1.19675	3.23343	0.11139	0.60934
gene_8540	-0.600434	4.91782	0.111428	0.60934
gene_1125	0.376559	6.41922	0.11153	0.60934
gene_1083	0.421202	5.74611	0.111536	0.60934
gene_2561	0.311759	6.03145	0.111619	0.60934
gene_6720	-0.478117	4.78608	0.111767	0.60934
gene_6082	-1.04608	1.66172	0.111782	0.60934
gene_1545	0.468319	7.70034	0.111801	0.60934
gene_996	-1.70017	-0.0497151	0.111908	0.609513
gene_8111	-0.935339	1.24875	0.112297	0.610536
gene_8291	0.476027	4.39688	0.112796	0.610536
gene_3319	-0.67894	3.6924	0.112833	0.610536
gene_4313	-0.471795	5.76365	0.112834	0.610536
gene_1816	-0.689237	3.98621	0.11298	0.610536
gene_3325	-0.879916	3.80231	0.113087	0.610536
gene_2945	0.43179	8.98685	0.113132	0.610536
gene_701	-0.920654	3.71648	0.113168	0.610536
gene_8437	0.480765	5.16229	0.113195	0.610536
gene_4225	0.507838	4.50589	0.113225	0.610536
gene_4435	0.872238	2.57185	0.113271	0.610536
gene_1461	-0.295187	5.91627	0.113348	0.610536
gene_3278	-1.11661	1.76882	0.113413	0.610536
gene_390	0.683559	2.8242	0.113416	0.610536
gene_8844	0.824189	4.06321	0.113551	0.610536
gene_1647	-1.2723	1.51531	0.113641	0.610536
gene_6084	0.303304	6.65911	0.113683	0.610536
gene_5260	-0.986804	2.30506	0.113754	0.610536
gene_8189	-0.65443	9.13881	0.113776	0.610536
gene_8687	0.475035	6.29971	0.113827	0.610536
gene_6810	0.497748	6.21264	0.113914	0.610536
gene_7056	-0.471425	7.45491	0.113977	0.610536
gene_8359	1.3833	-0.261832	0.113991	0.610536
gene_4084	-1.33625	0.253514	0.114305	0.610536
gene_6360	0.671691	4.46295	0.114319	0.610536
gene_1015	-0.511132	6.07273	0.114467	0.610536
gene_6601	-1.36578	0.641043	0.114487	0.610536
gene_4057	1.15548	3.10729	0.114492	0.610536
gene_7882	-0.35306	6.3633	0.114514	0.610536
gene_608	0.304162	8.60011	0.11455	0.610536
gene_4878	-0.646666	3.97468	0.114596	0.610536
gene_1959	1.23158	2.40797	0.114674	0.610536
gene_2150	0.357493	7.19867	0.114789	0.610536
gene_5199	0.496018	7.3485	0.114856	0.610536
gene_6898	1.01039	0.889464	0.11486	0.610536
gene_4252	0.958305	3.24051	0.114923	0.610536
gene_3640	0.549283	6.99637	0.114931	0.610536
gene_4710	-2.04015	1.14993	0.114987	0.610536
gene_5572	-0.424027	4.90535	0.115084	0.610536
gene_2271	-0.359084	6.84142	0.115112	0.610536
gene_2502	-0.589291	6.34419	0.115219	0.610635
gene_3276	0.689966	3.3816	0.115281	0.610635
gene_4300	0.4898	6.49185	0.115356	0.610635
gene_3360	0.358986	7.49292	0.11566	0.611841
gene_4129	-0.502359	4.19887	0.115821	0.612293
gene_2621	-0.66947	4.38322	0.116029	0.612869
gene_3364	0.409085	9.45381	0.116081	0.612869
gene_2180	-0.936841	5.74775	0.116409	0.613165
gene_6230	-0.609125	4.08924	0.116484	0.613165
gene_85	1.06506	3.62283	0.116501	0.613165
gene_806	0.480308	6.723	0.116583	0.613165
gene_2915	-0.598593	5.48435	0.116635	0.613165
gene_738	0.592353	4.35218	0.116678	0.613165
gene_4941	-0.819022	7.19497	0.116783	0.613165
gene_643	-0.591137	3.7176	0.116829	0.613165
gene_5449	0.508644	7.13896	0.116868	0.613165
gene_7883	0.332969	5.93601	0.116894	0.613165
gene_8777	-0.936178	1.72421	0.117594	0.615826
gene_6824	0.492589	5.07951	0.117666	0.615826
gene_2330	-1.37321	4.43463	0.117755	0.615826
gene_1594	0.440474	6.19484	0.117826	0.615826
gene_3492	0.462999	5.45912	0.117857	0.615826
gene_7317	0.610605	5.62694	0.117916	0.615826
gene_7395	0.475329	6.19684	0.117934	0.615826
gene_1021	-0.8294	5.02571	0.118263	0.617145
gene_266	0.344374	7.36037	0.118524	0.618111
gene_6467	-0.821247	7.79243	0.118672	0.618484
gene_6036	-0.697089	3.79815	0.118866	0.619005
gene_2743	0.313238	6.89153	0.118939	0.619005
gene_4017	0.523524	7.30649	0.119147	0.619005
gene_5770	-0.66828	3.91807	0.119159	0.619005
gene_7059	0.437251	6.14153	0.119297	0.619005
gene_3823	0.460545	6.07924	0.119346	0.619005
gene_323	-0.749981	7.92954	0.119378	0.619005
gene_6685	0.491033	5.38143	0.119419	0.619005
gene_436	-0.71143	3.15859	0.11946	0.619005
gene_2032	-0.475162	4.85036	0.119585	0.619094
gene_3161	-0.489539	6.55597	0.119644	0.619094
gene_5806	-0.610938	4.71765	0.119706	0.619094
gene_1433	0.296924	6.99636	0.119972	0.620075
gene_8247	-0.447217	6.85673	0.120053	0.620095
gene_3699	-0.800492	3.71368	0.120474	0.620936
gene_324	0.829041	5.93734	0.120551	0.620936
gene_3997	0.46383	4.81342	0.120623	0.620936
gene_8715	-0.980905	2.15964	0.120651	0.620936
gene_7390	-0.352586	5.62203	0.120652	0.620936
gene_5580	0.506929	5.58057	0.120692	0.620936
gene_1139	-1.09539	3.31848	0.120763	0.620936
gene_7967	0.875769	5.6301	0.120957	0.620936
gene_1768	0.438022	5.42054	0.12111	0.620936
gene_2686	-0.584445	5.86327	0.121144	0.620936
gene_5522	0.810262	1.82144	0.121251	0.620936
gene_8227	-0.72936	6.68368	0.121277	0.620936
gene_6218	0.622614	4.77922	0.121284	0.620936
gene_4597	-0.381862	5.65513	0.121289	0.620936
gene_3183	0.460958	6.56022	0.121401	0.621115
gene_5303	0.312841	6.13673	0.121602	0.621753
gene_2725	-1.13384	1.17875	0.121745	0.621807
gene_5324	-0.569199	6.35102	0.121816	0.621807
gene_5762	0.59616	4.82734	0.121843	0.621807
gene_1688	0.436898	8.31327	0.121966	0.62204
gene_5884	-0.309489	6.25469	0.122173	0.622586
gene_5459	-0.977915	5.63966	0.122314	0.622586
gene_3502	-0.75762	6.98372	0.12232	0.622586
gene_3108	-0.358114	6.61035	0.12238	0.622586
gene_6248	0.976709	2.05587	0.123015	0.625179
gene_6376	-0.886721	4.09653	0.123099	0.625179
gene_2053	0.716383	10.2321	0.123135	0.625179
gene_8152	-0.397025	7.46408	0.123254	0.625179
gene_5527	0.605441	3.83981	0.123366	0.625179
gene_2465	1.55423	-0.364965	0.123399	0.625179
gene_2826	-0.526006	4.78811	0.12343	0.625179
gene_2255	-0.966238	2.12403	0.123591	0.625333
gene_1368	-0.382217	5.69454	0.123615	0.625333
gene_450	-0.455933	4.36119	0.123745	0.625429
gene_6708	1.12562	-0.448989	0.123788	0.625429
gene_6652	-0.989077	1.78223	0.12419	0.626213
gene_3614	0.365311	5.63988	0.124237	0.626213
gene_8192	1.37189	-0.529693	0.124382	0.626213
gene_3723	0.391898	5.58238	0.124401	0.626213
gene_1138	-0.73516	5.49297	0.124449	0.626213
gene_7164	0.339199	8.26889	0.124456	0.626213
gene_594	0.928823	0.433971	0.124712	0.626213
gene_3812	0.427382	5.83627	0.124747	0.626213
gene_7600	0.518517	7.94953	0.124771	0.626213
gene_5092	-0.718097	5.04727	0.124792	0.626213
gene_2757	0.8172	5.38184	0.124794	0.626213
gene_5608	0.51307	9.43629	0.125092	0.626554
gene_4605	0.533901	5.10853	0.125157	0.626554
gene_7639	0.271172	6.99139	0.125192	0.626554
gene_8228	0.416528	5.32071	0.125279	0.626554
gene_5412	-0.489545	6.86376	0.125342	0.626554
gene_4663	-0.738131	9.17167	0.125345	0.626554
gene_5720	-0.488211	6.82824	0.12543	0.626554
gene_5760	-0.56074	4.75779	0.1255	0.626554
gene_5632	0.355625	6.39283	0.12556	0.626554
gene_8079	-0.310391	6.04619	0.125636	0.626554
gene_7734	0.474131	5.63118	0.125823	0.627104
gene_5111	1.08259	2.17284	0.126069	0.627304
gene_5715	0.625641	3.71094	0.126163	0.627304
gene_3902	0.846887	2.58637	0.12623	0.627304
gene_2487	0.662986	6.8965	0.126288	0.627304
gene_2763	1.37897	1.67606	0.126306	0.627304
gene_1480	-0.668859	6.1575	0.126328	0.627304
gene_320	0.900234	9.31011	0.126514	0.627839
gene_1727	-0.45824	6.97961	0.126716	0.628457
gene_306	-0.77549	7.15019	0.126826	0.628618
gene_2410	0.315867	5.97524	0.127054	0.62867
gene_4793	-1.28362	1.68821	0.127066	0.62867
gene_6371	-0.347093	5.14193	0.127069	0.62867
gene_63	-1.41916	-0.0664843	0.127264	0.629249
gene_6535	-0.77788	6.50985	0.127429	0.629644
gene_3946	0.346135	7.10614	0.127499	0.629644
gene_1086	0.398541	5.15709	0.127941	0.630545
gene_6190	1.06019	0.932461	0.127988	0.630545
gene_4631	0.488359	5.94937	0.128053	0.630545
gene_7569	-1.29339	-0.226464	0.128066	0.630545
gene_1279	0.706393	4.98951	0.128133	0.630545
gene_7144	-1.44151	-0.269234	0.128149	0.630545
gene_6954	0.680327	5.70181	0.128312	0.630963
gene_5753	-1.77096	0.327518	0.128507	0.631099
gene_8405	0.447289	5.12028	0.128566	0.631099
gene_1465	-0.296308	6.7938	0.128591	0.631099
gene_6457	-0.472961	8.72713	0.128787	0.631099
gene_6606	-0.52169	5.06808	0.128883	0.631099
gene_4456	0.358909	7.16621	0.1289	0.631099
gene_7690	0.344767	6.82188	0.128924	0.631099
gene_5235	-0.966072	2.20535	0.129208	0.631099
gene_1685	-0.730592	5.75673	0.129298	0.631099
gene_2506	-0.369978	6.38505	0.129324	0.631099
gene_5575	0.469093	7.09299	0.129324	0.631099
gene_6461	-1.25031	1.87358	0.129326	0.631099
gene_8231	0.527596	5.94993	0.129352	0.631099
gene_7263	0.519334	4.24321	0.129612	0.631681
gene_7554	0.525758	4.10226	0.129628	0.631681
gene_2682	-0.529896	7.39166	0.129777	0.632031
gene_1711	-0.672982	8.81878	0.129983	0.632653
gene_1238	0.516546	5.33541	0.130207	0.633107
gene_7284	0.380167	6.34383	0.130233	0.633107
gene_6219	-1.12855	2.86229	0.130625	0.633476
gene_2023	-1.18993	1.60166	0.13064	0.633476
gene_6053	-0.405474	5.2624	0.130712	0.633476
gene_6316	-0.764731	4.63221	0.130758	0.633476
gene_1358	0.388601	9.93086	0.130852	0.633476
gene_4166	0.532301	10.7399	0.13089	0.633476
gene_7985	-0.906059	4.88855	0.130909	0.633476
gene_2861	-0.93421	3.73583	0.130935	0.633476
gene_5484	1.05116	5.17386	0.131233	0.63453
gene_4050	1.2779	4.49593	0.131361	0.63453
gene_2735	-0.905828	3.94916	0.131387	0.63453
gene_4842	0.378591	7.51435	0.131781	0.636042
gene_808	0.487144	7.92301	0.131858	0.636042
gene_7218	0.438033	5.79088	0.131937	0.636045
gene_7416	-0.675726	8.24734	0.132062	0.636267
gene_5535	-0.829293	3.38304	0.13214	0.636267
gene_1848	0.499635	8.62777	0.132455	0.636959
gene_8046	-1.49992	0.505783	0.132455	0.636959
gene_1501	0.578993	4.31501	0.132545	0.636959
gene_923	0.664253	5.93636	0.132598	0.636959
gene_6845	0.510658	4.84956	0.132702	0.637078
gene_8007	-0.963693	5.42922	0.132998	0.637847
gene_6552	1.37582	0.334921	0.133117	0.637847
gene_3049	-0.680672	4.03684	0.133163	0.637847
gene_7757	0.362331	6.43622	0.133238	0.637847
gene_5845	0.42022	6.99617	0.133256	0.637847
gene_604	1.08175	4.54067	0.13377	0.638804
gene_1758	-0.737916	4.41947	0.13381	0.638804
gene_8309	1.36698	2.13182	0.133859	0.638804
gene_5970	1.18193	2.18232	0.133869	0.638804
gene_463	-0.775306	1.21321	0.133945	0.638804
gene_8860	0.344408	7.06063	0.133971	0.638804
gene_19	-0.502572	4.11339	0.134008	0.638804
gene_2092	0.384797	7.57868	0.134194	0.639317
gene_470	0.732762	6.59609	0.134583	0.640741
gene_2460	0.494522	4.39027	0.134787	0.640741
gene_2406	-0.548678	6.49859	0.134805	0.640741
gene_2380	-0.376426	8.44751	0.13481	0.640741
gene_3415	-0.604362	4.12658	0.13501	0.641168
gene_2270	-0.384789	4.72182	0.135167	0.641168
gene_5341	-0.519706	4.13692	0.135195	0.641168
gene_5921	-0.668104	2.83145	0.135227	0.641168
gene_4353	0.623183	3.7726	0.13566	0.641168
gene_6978	0.336098	6.84362	0.135678	0.641168
gene_4866	0.330509	5.93925	0.135702	0.641168
gene_4675	-1.31867	0.258992	0.135786	0.641168
gene_7430	0.606969	3.23469	0.135959	0.641168
gene_7486	-0.467981	7.18534	0.136033	0.641168
gene_5833	0.399984	5.80581	0.136106	0.641168
gene_1443	-0.548463	6.1316	0.136206	0.641168
gene_1914	-0.713699	4.24919	0.136232	0.641168
gene_8583	-0.454406	4.53997	0.136366	0.641168
gene_5529	-0.352967	6.33055	0.136392	0.641168
gene_1352	0.415931	7.61522	0.136429	0.641168
gene_4938	-0.797561	5.43986	0.136607	0.641168
gene_3531	0.463278	4.94656	0.136685	0.641168
gene_4296	0.499258	5.70853	0.136755	0.641168
gene_1490	0.324662	6.53216	0.136764	0.641168
gene_3716	0.744263	3.7797	0.136843	0.641168
gene_3207	1.06148	6.96833	0.136918	0.641168
gene_2541	0.460482	5.9138	0.136956	0.641168
gene_3988	-0.419087	7.34431	0.137005	0.641168
gene_7524	0.640225	5.77847	0.137059	0.641168
gene_5232	-0.495399	6.58465	0.137128	0.641168
gene_8567	0.946288	4.61717	0.137241	0.641168
gene_3674	-1.32995	-0.187741	0.137328	0.641168
gene_6548	-0.29691	6.6026	0.137378	0.641168
gene_2384	-0.33815	5.88647	0.137406	0.641168
gene_7978	-0.504416	3.66028	0.137554	0.641168
gene_442	-0.32339	6.18332	0.137596	0.641168
gene_3286	0.416935	5.60177	0.137625	0.641168
gene_7375	-0.606604	4.71027	0.137652	0.641168
gene_3729	-1.31867	-0.546462	0.137946	0.641168
gene_524	-0.508195	5.40642	0.138053	0.641168
gene_1921	-0.443533	3.64395	0.138108	0.641168
gene_3912	-1.48121	1.975	0.13823	0.641168
gene_3545	-0.863031	3.55036	0.138239	0.641168
gene_6935	0.541732	5.38362	0.138346	0.641168
gene_6126	-0.61509	3.83379	0.138373	0.641168
gene_4862	-0.393582	5.35491	0.138456	0.641168
gene_3652	-0.866143	2.58369	0.138461	0.641168
gene_3370	0.470986	8.24742	0.138475	0.641168
gene_8443	0.3315	7.26235	0.138572	0.641168
gene_7082	-0.478214	4.77043	0.138664	0.641168
gene_4361	0.510243	5.57663	0.138666	0.641168
gene_3527	-0.327174	6.69144	0.138699	0.641168
gene_569	0.379856	5.94133	0.139113	0.642639
gene_4680	-0.418284	6.68341	0.139238	0.642639
gene_7877	0.333584	5.24384	0.139256	0.642639
gene_625	-1.28722	2.80992	0.139448	0.643158
gene_545	0.465931	4.3844	0.139782	0.644046
gene_836	0.929049	4.34785	0.139826	0.644046
gene_741	0.531792	4.56495	0.139879	0.644046
gene_385	0.542687	4.69673	0.140038	0.644326
gene_7096	0.358246	8.9653	0.140099	0.644326
gene_7387	-1.31664	1.31826	0.140256	0.64457
gene_4561	1.37888	-0.448989	0.140311	0.64457
gene_2493	1.54569	0.00416464	0.140574	0.645071
gene_3181	-1.25258	0.761371	0.140662	0.645071
gene_8773	0.425838	5.05753	0.140766	0.645071
gene_6801	0.893118	6.31696	0.140791	0.645071
gene_8669	-0.422782	5.8531	0.140818	0.645071
gene_2458	0.350283	7.08116	0.141433	0.647179
gene_8814	-1.46724	-0.424029	0.14147	0.647179
gene_2577	-0.694395	3.91011	0.141607	0.647179
gene_119	-0.700083	5.33066	0.141647	0.647179
gene_6689	-0.367308	6.36201	0.141705	0.647179
gene_6889	0.469915	4.3442	0.141758	0.647179
gene_6064	-1.03139	2.24989	0.142029	0.64738
gene_2640	0.705297	4.6858	0.142294	0.64738
gene_1895	-1.53946	0.217358	0.142366	0.64738
gene_3961	-0.830311	3.87233	0.142387	0.64738
gene_5172	0.968674	3.24526	0.142482	0.64738
gene_5492	-0.433052	5.72945	0.142493	0.64738
gene_4960	-0.422957	6.43945	0.142577	0.64738
gene_25	0.412257	4.20838	0.142605	0.64738
gene_2703	0.496685	6.29536	0.142611	0.64738
gene_8815	0.382801	7.9695	0.14264	0.64738
gene_6586	0.620546	4.70869	0.142705	0.64738
gene_7835	-0.721188	2.91996	0.142897	0.64738
gene_4340	0.645814	3.13067	0.142995	0.64738
gene_1915	-1.61531	5.66589	0.143	0.64738
gene_1691	0.833291	3.55808	0.143001	0.64738
gene_7663	0.637947	3.59891	0.143129	0.6476
gene_6423	-0.454278	5.43144	0.143346	0.648218
gene_2946	-0.488181	6.01511	0.143468	0.648409
gene_949	0.486275	4.7193	0.144076	0.650795
gene_3783	-0.633439	3.578	0.144352	0.651618
gene_7275	0.526813	7.86489	0.14442	0.651618
gene_1857	0.530286	4.17662	0.144612	0.651768
gene_1559	0.288426	7.24383	0.144685	0.651768
gene_7893	-1.34655	1.43014	0.144731	0.651768
gene_1320	-0.387168	5.49038	0.144775	0.651768
gene_8845	0.500718	8.22217	0.144882	0.651774
gene_8675	0.613647	8.24505	0.144937	0.651774
gene_830	-0.411947	5.10108	0.145064	0.651806
gene_4428	0.425907	4.75614	0.145105	0.651806
gene_5554	0.440097	7.31155	0.145233	0.651816
gene_1060	-0.963834	4.32882	0.145347	0.651816
gene_3099	-0.773747	1.80908	0.145349	0.651816
gene_5757	-0.754094	6.1092	0.145541	0.652237
gene_8038	-0.799728	4.59585	0.145604	0.652237
gene_4537	0.768597	5.14129	0.145807	0.652789
gene_3571	-1.64309	1.68872	0.146448	0.654784
gene_8811	-0.758726	5.07901	0.14652	0.654784
gene_7580	0.314567	6.73641	0.146575	0.654784
gene_3477	-0.635231	6.01708	0.146607	0.654784
gene_6338	0.775135	2.09342	0.146657	0.654784
gene_7551	0.314859	6.81958	0.146889	0.654876
gene_2914	-0.736958	4.6404	0.147003	0.654876
gene_5247	1.2816	1.33044	0.147092	0.654876
gene_4212	-0.969033	3.53538	0.147314	0.654876
gene_2182	0.298412	6.22268	0.147318	0.654876
gene_7012	0.506938	4.27115	0.147402	0.654876
gene_348	0.493153	4.83858	0.147422	0.654876
gene_2679	0.737401	6.78857	0.147487	0.654876
gene_961	0.394104	5.75938	0.147512	0.654876
gene_8166	-0.414897	6.58367	0.147573	0.654876
gene_7151	0.775525	4.08464	0.147646	0.654876
gene_4405	-0.483176	5.00671	0.147648	0.654876
gene_2849	0.365391	6.32069	0.147973	0.655759
gene_5045	-1.20833	2.6394	0.148009	0.655759
gene_2304	-0.650367	6.05182	0.14822	0.65607
gene_5802	0.706177	4.45957	0.148242	0.65607
gene_3451	-0.717322	3.56023	0.148388	0.656361
gene_3146	-0.326875	6.85211	0.148757	0.657247
gene_5641	-0.387539	5.81129	0.148809	0.657247
gene_5258	-0.604932	5.8609	0.148832	0.657247
gene_3780	-1.05672	2.89521	0.14946	0.658167
gene_7241	-0.397859	6.23261	0.149529	0.658167
gene_6878	-0.288109	7.2103	0.149608	0.658167
gene_5491	0.410418	4.35186	0.149744	0.658167
gene_5721	-0.428536	4.34493	0.149791	0.658167
gene_238	0.353107	6.18262	0.149902	0.658167
gene_3684	0.533529	4.64766	0.150005	0.658167
gene_361	-0.75412	5.24107	0.150063	0.658167
gene_5156	0.798977	3.62245	0.150345	0.658167
gene_1912	-0.909467	2.45475	0.150437	0.658167
gene_6884	-0.419889	5.82252	0.15044	0.658167
gene_7350	-0.301254	6.2765	0.150462	0.658167
gene_1570	-0.845667	1.24478	0.150508	0.658167
gene_7098	-1.60875	1.89472	0.150518	0.658167
gene_7561	-0.946047	1.81705	0.150582	0.658167
gene_2970	-0.463829	6.66327	0.150772	0.658167
gene_4727	0.899047	1.48796	0.150783	0.658167
gene_7187	0.372518	6.5057	0.150792	0.658167
gene_486	-0.358743	5.77511	0.151059	0.658167
gene_1226	-0.438356	7.575	0.151063	0.658167
gene_7323	1.14515	-0.23766	0.151267	0.658167
gene_8254	-0.334766	7.11633	0.151323	0.658167
gene_2223	-0.536521	10.6173	0.15145	0.658167
gene_4667	0.881474	4.45017	0.151537	0.658167
gene_4750	-0.465495	5.18551	0.151669	0.658167
gene_5357	0.296262	5.82528	0.151711	0.658167
gene_4503	-0.534599	4.35649	0.151728	0.658167
gene_4008	0.332241	5.22448	0.151836	0.658167
gene_4059	0.699382	6.36064	0.151904	0.658167
gene_612	0.412493	6.37697	0.152281	0.658167
gene_4810	-0.733592	3.02895	0.152434	0.658167
gene_504	-0.731539	8.80146	0.152482	0.658167
gene_6608	1.34532	2.05385	0.152518	0.658167
gene_2294	0.419282	6.443	0.152666	0.658167
gene_3308	-0.606344	3.15038	0.15278	0.658167
gene_7731	-0.427233	5.24289	0.152812	0.658167
gene_6830	-1.55657	0.283222	0.152842	0.658167
gene_7716	-1.38557	1.43689	0.152911	0.658167
gene_6285	-0.32234	8.03497	0.15303	0.658167
gene_6754	-0.724789	4.34791	0.153325	0.658167
gene_850	-0.534637	5.3032	0.153382	0.658167
gene_4642	1.36561	3.06817	0.153469	0.658167
gene_6415	1.4541	2.40743	0.153534	0.658167
gene_3782	-1.40963	0.713082	0.153569	0.658167
gene_3947	-0.548031	4.65524	0.153658	0.658167
gene_2999	-0.425659	6.99508	0.153675	0.658167
gene_4430	-0.921967	5.05731	0.153798	0.658167
gene_5425	-1.63614	-0.223458	0.153908	0.658167
gene_33	-0.79505	3.84891	0.153927	0.658167
gene_1659	-0.491789	5.50121	0.154017	0.658167
gene_3636	-0.890492	2.9005	0.15408	0.658167
gene_6180	-1.15727	4.03235	0.154195	0.658167
gene_3996	0.303681	6.89407	0.154215	0.658167
gene_7874	-1.41916	-0.424029	0.154244	0.658167
gene_7062	0.308569	6.14455	0.154308	0.658167
gene_6131	-0.707204	3.49827	0.15434	0.658167
gene_2237	0.577799	3.92487	0.154385	0.658167
gene_4515	0.332042	7.27934	0.154398	0.658167
gene_4372	-1.55335	-0.000584042	0.154414	0.658167
gene_3821	-1.43804	-0.684488	0.154561	0.658167
gene_3249	0.414975	5.30494	0.154735	0.658167
gene_4640	0.703942	4.06162	0.154804	0.658167
gene_725	-0.376611	7.46572	0.15485	0.658167
gene_453	-0.780255	2.44352	0.154866	0.658167
gene_4756	0.384447	7.33805	0.154877	0.658167
gene_2780	-0.733784	3.49573	0.15495	0.658167
gene_3566	-0.547534	4.05204	0.155017	0.658167
gene_7674	-0.547789	3.90605	0.155043	0.658167
gene_980	0.361881	7.59982	0.155127	0.658167
gene_845	-1.01064	2.56498	0.155245	0.658167
gene_3629	0.473521	4.93542	0.155294	0.658167
gene_7579	-0.321292	7.26911	0.155296	0.658167
gene_3452	-1.00702	5.73517	0.155306	0.658167
gene_3171	-0.509526	5.60791	0.155632	0.658167
gene_94	0.783924	2.74262	0.155642	0.658167
gene_1534	0.329729	7.10108	0.155653	0.658167
gene_3623	-0.463145	4.31292	0.155895	0.658167
gene_4641	0.803544	1.87667	0.155934	0.658167
gene_7393	-0.563656	4.72714	0.155961	0.658167
gene_5623	0.555104	3.85744	0.155968	0.658167
gene_1670	0.360257	7.52646	0.155983	0.658167
gene_1663	0.455504	6.85559	0.156123	0.658167
gene_3970	-0.474818	5.74465	0.156141	0.658167
gene_271	-0.570377	5.48712	0.156173	0.658167
gene_4735	-0.607456	8.7498	0.156203	0.658167
gene_1660	0.801303	10.235	0.156249	0.658167
gene_3251	-1.38913	-0.080334	0.156287	0.658167
gene_1181	-0.770582	2.86687	0.156368	0.658167
gene_4146	0.795216	4.73987	0.15659	0.658167
gene_3606	-0.536766	3.17394	0.15662	0.658167
gene_5420	-0.773762	9.87764	0.156645	0.658167
gene_822	-0.511073	5.27041	0.156687	0.658167
gene_2536	-0.876728	0.84726	0.156771	0.658167
gene_622	-0.662424	9.22532	0.15687	0.658167
gene_5724	0.542105	9.46507	0.156951	0.658167
gene_2997	-0.701325	3.58607	0.15698	0.658167
gene_3453	0.597159	3.87166	0.157027	0.658167
gene_6736	0.304395	6.82658	0.157035	0.658167
gene_7829	0.314893	8.2627	0.157333	0.658167
gene_573	0.92907	1.4117	0.157361	0.658167
gene_2966	0.589534	8.69648	0.15737	0.658167
gene_8626	1.02318	6.48551	0.157437	0.658167
gene_5824	-1.09782	0.666551	0.157486	0.658167
gene_5011	0.536927	5.13221	0.157573	0.658167
gene_7344	-0.338476	4.9166	0.157586	0.658167
gene_8206	-0.651204	5.24143	0.15774	0.658167
gene_167	-0.636968	3.59763	0.157785	0.658167
gene_1789	-0.470838	4.33602	0.157817	0.658167
gene_1745	0.646883	4.00166	0.157945	0.658364
gene_4411	-0.30431	7.21855	0.15807	0.658544
gene_7745	-0.65431	3.01231	0.158416	0.658788
gene_4874	0.416511	6.02689	0.158424	0.658788
gene_2842	-0.612329	3.98122	0.158449	0.658788
gene_533	-1.69374	1.80267	0.158656	0.658788
gene_7870	0.48301	5.27145	0.158719	0.658788
gene_3991	-0.556534	6.1547	0.158782	0.658788
gene_7293	-0.614092	4.09463	0.158863	0.658788
gene_1775	0.643576	3.81162	0.158903	0.658788
gene_1184	-0.521422	4.23571	0.159028	0.658788
gene_2553	0.44117	7.00307	0.159088	0.658788
gene_2835	-0.498753	9.95467	0.159108	0.658788
gene_1207	0.996145	2.00713	0.159151	0.658788
gene_315	-0.489923	6.45459	0.159225	0.658788
gene_4502	-0.881927	2.03794	0.159267	0.658788
gene_7648	-0.817672	1.50875	0.159501	0.659262
gene_2733	1.41038	-0.602996	0.159545	0.659262
gene_1772	0.304231	6.29156	0.159814	0.659853
gene_5961	-0.826548	5.23431	0.160032	0.659853
gene_1355	0.437696	4.96433	0.160158	0.659853
gene_5988	-0.91662	3.141	0.160188	0.659853
gene_1404	-1.1775	0.89386	0.160194	0.659853
gene_7256	-0.653309	9.35949	0.160215	0.659853
gene_412	0.994612	0.984326	0.160268	0.659853
gene_5323	-0.838202	3.10157	0.16034	0.659853
gene_3698	-1.74235	2.07335	0.160548	0.6601
gene_3682	-0.715219	5.56928	0.160563	0.6601
gene_1902	0.325781	6.33387	0.160671	0.660209
gene_4564	-0.672327	3.42855	0.160947	0.660403
gene_8485	0.28465	6.20184	0.160974	0.660403
gene_8496	0.297435	6.15474	0.161012	0.660403
gene_8178	0.432725	5.73718	0.161121	0.660403
gene_5013	-0.716588	8.54265	0.161239	0.660403
gene_7538	-0.883625	6.31431	0.161275	0.660403
gene_544	-1.07374	0.892135	0.161289	0.660403
gene_757	1.29114	-0.0013724	0.161483	0.660693
gene_3686	0.683773	2.78025	0.161523	0.660693
gene_5504	-0.410596	5.96028	0.161673	0.660718
gene_8150	0.499789	4.3901	0.161793	0.660718
gene_5138	-0.693971	7.42482	0.162109	0.660718
gene_7457	-0.580857	5.0542	0.162135	0.660718
gene_3358	-0.612319	5.33166	0.16234	0.660718
gene_8724	-0.699178	3.45189	0.162383	0.660718
gene_6950	-0.311144	7.369	0.162438	0.660718
gene_1919	1.2945	0.343111	0.162657	0.660718
gene_1953	0.391177	5.34361	0.162683	0.660718
gene_190	-0.827321	4.08429	0.162695	0.660718
gene_1840	0.40871	6.43339	0.162697	0.660718
gene_6459	-0.634476	3.041	0.162747	0.660718
gene_4213	-0.303063	6.52565	0.162769	0.660718
gene_4978	-1.2057	1.03189	0.162775	0.660718
gene_6283	-0.771205	3.50304	0.162805	0.660718
gene_945	0.307543	6.21171	0.162834	0.660718
gene_8056	-0.405236	4.72314	0.163027	0.660865
gene_8655	0.809109	2.4039	0.163098	0.660865
gene_5219	0.813294	1.9547	0.163128	0.660865
[truncated: 6,100 more rows]

## Sheet: Xylose vs. cellobiose
Gene	logFC	AveExpr	P.Value	adj.P.Val
gene_8014	4.18057	9.41811	9.09447e-06	0.0454782
gene_3221	1.77303	7.00257	1.57376e-05	0.0454782
gene_6632	5.22349	8.94201	1.68459e-05	0.0454782
gene_3889	4.36791	5.78808	3.75714e-05	0.0760726
gene_5929	-1.37396	5.2122	5.65206e-05	0.0915521
gene_1313	4.97676	9.53023	9.56726e-05	0.129142
gene_4336	-3.11283	1.38394	0.000165304	0.191257
gene_3914	3.41818	0.0309894	0.000214717	0.209023
gene_927	1.21078	5.87525	0.000255645	0.209023
gene_5000	2.01947	7.7704	0.000260615	0.209023
gene_6755	1.03134	5.88294	0.000297727	0.209023
gene_2140	-1.69653	4.84217	0.000317616	0.209023
gene_1763	-1.64344	6.0558	0.000350483	0.209023
gene_7989	1.82375	3.87985	0.000370322	0.209023
gene_4768	2.0981	9.82762	0.000399653	0.209023
gene_1258	3.21165	0.749238	0.000412937	0.209023
gene_2241	1.43182	6.32978	0.000469809	0.218778
gene_8367	2.79997	5.81738	0.000490121	0.218778
gene_8060	-0.889416	6.02859	0.000513247	0.218778
gene_7501	-3.18179	1.0296	0.000566182	0.218833
gene_7775	-1.29039	5.6886	0.000578483	0.218833
gene_1443	-1.45437	6.1316	0.000645465	0.218833
gene_5976	1.53581	6.2233	0.000655852	0.218833
gene_6035	2.73668	7.13115	0.000689838	0.218833
gene_657	1.26121	7.91369	0.000718044	0.218833
gene_5880	-2.34525	1.69383	0.000791143	0.218833
gene_7654	2.70934	6.06501	0.000826844	0.218833
gene_5948	-1.03523	5.87923	0.000847916	0.218833
gene_1909	-2.55606	2.89153	0.000866264	0.218833
gene_1628	2.26481	1.84683	0.000899132	0.218833
gene_4421	1.44354	5.46886	0.000913611	0.218833
gene_5223	0.937702	7.49107	0.000990037	0.218833
gene_7276	2.91638	1.56731	0.000993683	0.218833
gene_4171	-1.84548	6.52344	0.00100228	0.218833
gene_50	1.36699	3.86228	0.00100651	0.218833
gene_7662	0.817925	5.70434	0.00103821	0.218833
gene_3703	1.148	8.72652	0.00105303	0.218833
gene_5126	1.11556	5.00625	0.00111811	0.218833
gene_7094	-2.83643	1.45024	0.00112724	0.218833
gene_4019	1.19457	7.46712	0.00112819	0.218833
gene_587	0.800721	7.20813	0.00113381	0.218833
gene_3438	-3.14305	-0.134563	0.00113483	0.218833
gene_4109	-1.25132	5.58997	0.00117683	0.220269
gene_8163	0.816756	7.39979	0.00121957	0.220269
gene_1383	-1.34311	4.27024	0.00125849	0.220269
gene_8670	1.81231	8.52477	0.00126521	0.220269
gene_8488	0.807613	9.86145	0.00127826	0.220269
gene_1322	0.800202	5.61362	0.00134003	0.222899
gene_3034	1.07612	5.43893	0.00134857	0.222899
gene_6521	3.82979	0.346341	0.00149426	0.24204
gene_8075	0.947992	6.3637	0.00155723	0.247294
gene_7714	-1.05848	5.24717	0.00187737	0.2924
gene_4725	-0.814647	8.61853	0.00205001	0.306362
gene_3091	-1.05626	5.5287	0.00206324	0.306362
gene_2415	-1.78351	9.1378	0.00208049	0.306362
gene_3256	1.98328	13.7969	0.00224794	0.325109
gene_4691	-1.52036	4.91585	0.00234868	0.327193
gene_6484	0.867366	5.33539	0.00247277	0.327193
gene_5254	-1.28461	4.65637	0.00247479	0.327193
gene_7127	1.13183	7.04842	0.0025485	0.327193
gene_3761	1.4602	4.38125	0.00256282	0.327193
gene_4101	0.881271	8.9429	0.00260553	0.327193
gene_1041	0.785397	6.40724	0.00260904	0.327193
gene_2239	-1.21772	4.99994	0.0026195	0.327193
gene_4786	-0.820753	6.70489	0.00263195	0.327193
gene_8074	1.69775	5.1591	0.0027042	0.327193
gene_2456	0.604792	6.29428	0.00270675	0.327193
gene_7510	1.82532	2.90751	0.00277287	0.330257
gene_3844	-0.904273	5.91981	0.00287281	0.331924
gene_8794	2.38778	5.02397	0.00287653	0.331924
gene_5120	1.1194	4.04688	0.00290982	0.331924
gene_3409	0.974565	6.84944	0.00296456	0.333472
gene_923	1.48277	5.93636	0.00314407	0.341532
gene_1634	-1.23279	4.45034	0.00316008	0.341532
gene_4680	-0.916569	6.68341	0.00318048	0.341532
gene_3935	-0.607667	6.66008	0.00321045	0.341532
gene_3334	-1.14949	5.11083	0.00325655	0.341532
gene_7332	-1.82779	2.03083	0.00328924	0.341532
gene_1502	-1.18004	3.88143	0.00342514	0.346763
gene_8199	0.831623	6.30874	0.00347842	0.346763
gene_7140	1.10673	6.41707	0.00349799	0.346763
gene_1471	2.43519	3.08872	0.00353769	0.346763
gene_5828	-0.693825	9.16529	0.00359969	0.346763
gene_4863	1.7895	4.8097	0.0036171	0.346763
gene_366	-1.2032	3.34425	0.00369384	0.346763
gene_2747	1.82473	3.13968	0.00376629	0.346763
gene_2052	1.1106	4.54941	0.00382746	0.346763
gene_7926	1.42886	3.66292	0.00388274	0.346763
gene_1513	-1.06358	4.17855	0.00388826	0.346763
gene_8792	2.05255	4.73637	0.00394011	0.346763
gene_2058	-1.87536	1.7077	0.00394189	0.346763
gene_5853	0.714926	4.91461	0.00399508	0.346763
gene_6393	-3.00936	2.37246	0.00404889	0.346763
gene_3402	1.95689	1.15451	0.00405243	0.346763
gene_7178	1.11657	4.11523	0.00406747	0.346763
gene_1435	-1.32713	3.61561	0.00422031	0.353719
gene_8047	1.79832	12.0345	0.00433492	0.353719
gene_635	1.01408	4.57312	0.00434304	0.353719
gene_1284	1.42285	3.88847	0.0043546	0.353719
gene_1690	-1.18574	6.23873	0.00444772	0.353719
gene_6039	1.2052	5.11436	0.00450175	0.353719
gene_4377	-0.792712	5.14885	0.00450462	0.353719
gene_2808	0.821986	6.44952	0.00453328	0.353719
gene_447	-2.23217	0.312012	0.00454893	0.353719
gene_3737	0.933185	5.05506	0.00459844	0.353719
gene_829	0.600194	6.65853	0.0046989	0.353719
gene_3864	0.893694	5.83317	0.00470495	0.353719
gene_1826	0.854577	6.19329	0.00471683	0.353719
gene_909	0.657425	5.30788	0.00496247	0.367343
gene_1803	-1.11066	5.56753	0.00498922	0.367343
gene_6703	-1.35315	3.25605	0.00508214	0.369968
gene_2590	-0.603046	6.37074	0.00511624	0.369968
gene_1925	0.717491	5.25287	0.00533944	0.371637
gene_2813	-1.6162	4.95798	0.00541701	0.371637
gene_5967	-1.89447	3.13298	0.00547426	0.371637
gene_5953	1.76763	2.39124	0.00548175	0.371637
gene_6128	-1.05234	5.10679	0.00548885	0.371637
gene_5322	-1.77724	2.12314	0.0055061	0.371637
gene_6901	0.662291	6.45197	0.00551338	0.371637
gene_8366	1.08303	3.69551	0.00552772	0.371637
gene_7069	-0.703619	5.84464	0.00569664	0.371637
gene_935	1.04619	3.54542	0.00583886	0.371637
gene_5293	0.783463	4.91182	0.00589973	0.371637
gene_3129	-0.917627	5.33719	0.0060605	0.371637
gene_5792	-2.3088	1.03069	0.00611704	0.371637
gene_920	-2.60672	0.0428877	0.00618023	0.371637
gene_2340	-1.42574	4.61986	0.00620983	0.371637
gene_907	0.653383	6.13117	0.0062169	0.371637
gene_2030	-1.10902	5.01502	0.00624056	0.371637
gene_1255	-1.32622	3.3165	0.00625898	0.371637
gene_4497	-2.00938	2.44894	0.00629756	0.371637
gene_8133	2.3876	0.844641	0.00631522	0.371637
gene_4321	-1.07118	4.13972	0.0063264	0.371637
gene_8442	-0.616631	5.91327	0.00633769	0.371637
gene_5362	0.700412	6.25591	0.00634165	0.371637
gene_5811	-0.722176	6.61214	0.00644388	0.371637
gene_2646	0.690331	6.3179	0.00651197	0.371637
gene_6493	1.36619	5.547	0.00651853	0.371637
gene_3508	1.69605	5.02552	0.00666821	0.371637
gene_5895	0.89386	7.43154	0.00670617	0.371637
gene_5507	0.888749	6.41795	0.00670701	0.371637
gene_3949	0.935657	7.30043	0.00672859	0.371637
gene_281	-1.1225	4.31243	0.00676347	0.371637
gene_8805	1.15822	4.17415	0.00681146	0.371637
gene_265	-2.54369	1.85048	0.00687957	0.371637
gene_8234	0.550418	7.14092	0.00694562	0.371637
gene_2946	-0.963419	6.01511	0.00698353	0.371637
gene_2200	-0.891064	8.30683	0.0070016	0.371637
gene_7589	-0.955849	4.57141	0.00704533	0.371637
gene_5039	0.818973	8.58733	0.00717034	0.371637
gene_6996	2.76182	0.978377	0.00717648	0.371637
gene_1338	-1.96583	1.47017	0.00727123	0.371637
gene_2555	-0.988302	4.94773	0.0073482	0.371637
gene_6732	-1.80067	2.64002	0.00736422	0.371637
gene_6698	0.980094	3.94095	0.0074108	0.371637
gene_8068	0.948967	5.42081	0.0074969	0.371637
gene_5489	0.695038	5.35846	0.00755007	0.371637
gene_3356	-0.71999	5.76498	0.00762779	0.371637
gene_2754	0.842063	5.25461	0.00766928	0.371637
gene_3146	-0.659689	6.85211	0.00773478	0.371637
gene_2049	2.07568	-0.660317	0.00784578	0.371637
gene_4249	-1.48757	3.87297	0.00787538	0.371637
gene_7159	1.06655	4.20816	0.0078948	0.371637
gene_3054	-0.682735	5.83138	0.00790201	0.371637
gene_7366	-0.669168	6.29997	0.00793299	0.371637
gene_4659	0.851574	5.62888	0.00796196	0.371637
gene_8813	1.11743	4.69001	0.0079737	0.371637
gene_1122	-0.776145	7.23282	0.00799075	0.371637
gene_8407	0.654264	6.07951	0.00799835	0.371637
gene_5809	-0.619943	5.98567	0.00800332	0.371637
gene_4449	-1.31785	2.94596	0.00802549	0.371637
gene_2322	0.89687	4.1681	0.00807286	0.371637
gene_3938	-0.865577	4.54746	0.00809872	0.371637
gene_1565	1.49585	2.91945	0.00815098	0.371637
gene_4552	-2.85433	0.222782	0.00815152	0.371637
gene_5080	-1.12894	5.41436	0.00817657	0.371637
gene_1343	-1.03332	3.63263	0.00818304	0.371637
gene_7457	-1.13451	5.0542	0.00836835	0.371637
gene_5390	-1.33565	5.91917	0.0084154	0.371637
gene_1995	-0.791194	7.22674	0.00843029	0.371637
gene_594	1.8671	0.433971	0.00843589	0.371637
gene_3108	-0.656147	6.61035	0.00846242	0.371637
gene_10	0.816467	8.89379	0.00852415	0.371637
gene_4866	0.636737	5.93925	0.00858311	0.371637
gene_5377	0.694989	5.47612	0.00877736	0.371637
gene_6581	0.710351	5.74038	0.00881798	0.371637
gene_6751	-1.09257	5.79176	0.00891639	0.371637
gene_2314	-1.01887	5.53377	0.00892361	0.371637
gene_1862	-0.730459	5.08496	0.00909049	0.371637
gene_284	0.717518	4.84887	0.00911882	0.371637
gene_2753	0.854033	6.05102	0.00912923	0.371637
gene_474	1.38904	4.41821	0.00922132	0.371637
gene_6854	0.787837	8.06231	0.00923163	0.371637
gene_7731	0.948083	5.24289	0.00926584	0.371637
gene_5698	1.51564	1.56472	0.00932614	0.371637
gene_4556	1.27666	3.96162	0.00938234	0.371637
gene_7150	-0.831033	5.09564	0.00954447	0.371637
gene_5222	1.34497	5.35361	0.00956064	0.371637
gene_8138	-3.09057	1.43015	0.00956722	0.371637
gene_2285	0.975804	6.24221	0.00958639	0.371637
gene_739	1.26187	5.75993	0.00959098	0.371637
gene_8764	0.808705	4.49453	0.00962983	0.371637
gene_1776	-1.91836	1.5944	0.00965152	0.371637
gene_6080	0.609149	6.413	0.00965235	0.371637
gene_6772	-1.07505	8.47554	0.00967406	0.371637
gene_3655	-2.08051	4.30581	0.00973904	0.371637
gene_252	1.12607	5.82282	0.00982613	0.371637
gene_8422	0.735459	5.50677	0.0098941	0.371637
gene_3057	-1.26274	3.6157	0.00989922	0.371637
gene_1392	-2.17561	3.62339	0.00990452	0.371637
gene_3857	0.538901	6.19987	0.00995606	0.371637
gene_4849	1.38032	5.19371	0.00997653	0.371637
gene_1146	-1.88199	2.1223	0.00998457	0.371637
gene_2192	-0.579285	5.58353	0.0100255	0.371637
gene_5787	0.961039	4.5426	0.0100319	0.371637
gene_5631	-0.791837	5.31087	0.0100434	0.371637
gene_8286	-0.786519	4.55907	0.0101171	0.371637
gene_5983	1.44444	13.117	0.0102125	0.371637
gene_929	1.33578	8.4114	0.0102394	0.371637
gene_5238	-2.38456	0.408889	0.0103018	0.371637
gene_7502	1.32952	3.29093	0.0103277	0.371637
gene_1429	1.4402	7.27364	0.0103472	0.371637
gene_1424	0.650968	5.88718	0.0103819	0.371637
gene_6448	-0.670253	6.26382	0.010418	0.371637
gene_3234	1.20167	9.49282	0.0104598	0.371637
gene_358	0.666374	7.58878	0.0104781	0.371637
gene_2437	-1.15544	7.20307	0.0105045	0.371637
gene_4251	0.687559	6.28555	0.0106453	0.371637
gene_2567	0.608279	5.92659	0.0106574	0.371637
gene_8547	-0.926648	3.56167	0.0106866	0.371637
gene_2087	1.39715	6.00658	0.0107017	0.371637
gene_4521	-0.590823	6.25068	0.0107051	0.371637
gene_1637	-0.797005	4.08034	0.0107135	0.371637
gene_152	0.756789	9.46709	0.0108443	0.371637
gene_2251	-0.668441	8.42596	0.0108775	0.371637
gene_6353	0.531465	6.20963	0.0109238	0.371637
gene_6956	-1.37408	2.63252	0.0109316	0.371637
gene_7047	1.94743	4.60134	0.010964	0.371637
gene_6270	-1.30486	4.88203	0.010967	0.371637
gene_2762	1.50183	4.73601	0.0110333	0.371907
gene_6803	0.570674	6.7286	0.0110754	0.371907
gene_1796	-1.50955	3.65812	0.0111196	0.371907
gene_4937	0.859784	6.81542	0.0112236	0.371907
gene_209	-1.27515	3.87062	0.0112294	0.371907
gene_498	-1.6966	2.72859	0.0112504	0.371907
gene_3463	0.917415	7.20136	0.0113386	0.373299
gene_7695	0.705665	7.29635	0.0114605	0.375784
gene_1387	1.2281	4.98768	0.0115824	0.378249
gene_4442	-2.0784	-0.665188	0.0116603	0.379265
gene_544	-1.95033	0.892135	0.0117658	0.380931
gene_8585	1.72528	1.43902	0.0118353	0.380931
gene_4984	0.635518	8.48845	0.011856	0.380931
gene_4751	-1.19734	4.44377	0.0118997	0.380931
gene_253	1.8671	0.968838	0.0121035	0.38401
gene_3822	-3.00795	-0.205502	0.0121544	0.38401
gene_6616	0.690161	5.77256	0.0121938	0.38401
gene_3730	0.609188	5.16905	0.0122169	0.38401
gene_3807	1.65136	7.66732	0.0122329	0.38401
gene_4701	-2.23695	-0.131208	0.0124464	0.389201
gene_3055	2.18661	0.622871	0.0125672	0.391468
gene_1790	0.561751	6.07664	0.0126643	0.39295
gene_4302	0.505854	5.89177	0.0127118	0.39295
gene_2736	0.73218	7.37024	0.0128357	0.393237
gene_221	-1.59861	2.32081	0.0128654	0.393237
gene_3607	0.6023	6.17268	0.0128667	0.393237
gene_7504	-1.45503	5.43388	0.0130746	0.397326
gene_2644	-0.86048	5.28679	0.0130986	0.397326
gene_7556	-0.886743	5.39385	0.0131478	0.397328
gene_1090	0.723057	7.34726	0.0132617	0.398335
gene_814	2.06186	2.87176	0.0132829	0.398335
gene_5984	1.83271	2.7086	0.0133286	0.398335
gene_5290	0.760164	7.34488	0.0134759	0.399469
gene_8092	2.45267	0.92993	0.0135409	0.399469
gene_4325	0.746138	5.10947	0.0135652	0.399469
gene_8080	-0.925723	5.5366	0.0136309	0.399469
gene_6852	-0.892224	6.32444	0.0136565	0.399469
gene_4655	-1.29085	3.68368	0.0136733	0.399469
gene_6823	-0.953122	4.68436	0.0137552	0.399469
gene_1661	1.38804	3.34101	0.0138326	0.399469
gene_8178	0.827344	5.73718	0.0139023	0.399469
gene_3200	1.72277	4.19624	0.0139303	0.399469
gene_717	0.578105	5.10395	0.0139416	0.399469
gene_5149	0.713571	5.52806	0.0139594	0.399469
gene_5282	-2.43444	0.165461	0.0140078	0.399469
gene_625	5.81712	2.80992	0.0141046	0.400457
gene_660	0.621331	6.37869	0.0141413	0.400457
gene_8406	0.546174	6.44446	0.0142234	0.401128
gene_7339	-0.864594	4.62783	0.014343	0.401128
gene_1991	0.962472	5.32192	0.014354	0.401128
gene_3512	0.889696	4.60735	0.0144197	0.401128
gene_4322	1.1894	3.76798	0.0144415	0.401128
gene_904	0.603351	6.38386	0.0144622	0.401128
gene_4543	-1.36033	3.09351	0.0145176	0.40129
gene_462	1.96111	4.90934	0.0147157	0.405382
gene_623	0.75569	5.37622	0.0148276	0.407082
gene_135	0.659165	7.14115	0.0148842	0.407253
gene_1301	0.900338	4.9155	0.0150045	0.409164
gene_8514	0.805363	5.38169	0.015102	0.410358
gene_7669	1.8824	4.07589	0.0151497	0.410358
gene_3896	0.498955	7.65818	0.0152852	0.411006
gene_5749	-1.52734	3.64571	0.0153415	0.411006
gene_964	-1.1414	4.34652	0.0153684	0.411006
gene_3498	1.24908	3.30125	0.0153766	0.411006
gene_3743	-0.943507	4.60384	0.0154813	0.411978
gene_5471	-0.718036	5.27149	0.0155357	0.411978
gene_9	3.12977	5.05789	0.0155656	0.411978
gene_2576	1.19787	5.59377	0.0156365	0.412507
gene_3682	-1.26271	5.56928	0.0156927	0.412646
gene_2102	0.606101	10.4404	0.0158244	0.414763
gene_3153	-0.928864	8.05081	0.0159085	0.415025
gene_8695	-0.645852	9.19128	0.0159742	0.415025
gene_1397	-0.573119	6.7327	0.0159881	0.415025
gene_114	0.856586	5.35042	0.0160918	0.415865
gene_33	-1.3537	3.84891	0.0162473	0.415865
gene_8307	-1.16756	5.91947	0.0162813	0.415865
gene_5442	-1.09032	5.78343	0.0163385	0.415865
gene_6796	0.690071	5.78719	0.0164215	0.415865
gene_431	1.07817	2.30556	0.0164242	0.415865
gene_8835	0.635194	5.56537	0.0164641	0.415865
gene_6068	1.00266	7.89349	0.0164828	0.415865
gene_1546	-1.69969	2.71585	0.0165512	0.415865
gene_4374	-1.50574	2.4126	0.0166303	0.415865
gene_8735	-1.41848	2.82028	0.0166607	0.415865
gene_7916	0.870558	6.90223	0.0167358	0.415865
gene_1970	0.538639	6.28135	0.0167839	0.415865
gene_4003	-2.44251	0.280691	0.0167894	0.415865
gene_2581	-0.539226	6.31204	0.0167959	0.415865
gene_5720	0.785294	6.82824	0.0168969	0.415865
gene_1977	1.24016	5.10784	0.0169088	0.415865
gene_7997	-2.21075	-0.177333	0.016946	0.415865
gene_8116	-0.678439	6.36014	0.0170229	0.415865
gene_3285	0.676779	7.09602	0.0170475	0.415865
gene_7950	0.855082	6.6444	0.0172351	0.419181
gene_4466	1.02879	7.18855	0.0173782	0.421394
gene_6864	1.01772	3.1713	0.0175222	0.422068
gene_4603	0.735135	6.82688	0.0175258	0.422068
gene_1816	-1.04568	3.98621	0.0175889	0.422068
gene_4145	0.503993	6.99677	0.0176144	0.422068
gene_5805	0.76415	5.34475	0.0176747	0.422265
gene_8335	-0.701535	8.13321	0.0177693	0.423275
gene_1839	-0.670788	5.26503	0.0178428	0.42378
gene_2625	0.60021	6.04511	0.0179967	0.425774
gene_1127	-0.849099	5.27139	0.0180448	0.425774
gene_3439	-1.02547	3.61303	0.0180845	0.425774
gene_6041	1.4156	6.09007	0.018257	0.426009
gene_8405	0.744116	5.12028	0.0182903	0.426009
gene_4871	0.952781	5.269	0.0183741	0.426009
gene_173	1.35755	5.9239	0.0184023	0.426009
gene_986	-0.782048	4.79988	0.0184312	0.426009
gene_7627	0.771228	4.95915	0.0185118	0.426009
gene_5750	-2.76351	0.0372285	0.0185121	0.426009
gene_1382	0.620313	5.70369	0.0185222	0.426009
gene_8215	0.796144	11.262	0.0185723	0.426009
gene_6132	0.95917	4.06558	0.0186205	0.426009
gene_1918	0.515634	5.83256	0.018793	0.426048
gene_1187	0.861153	6.89667	0.0188258	0.426048
gene_7694	0.807354	4.94032	0.0188979	0.426048
gene_1687	1.409	4.88195	0.0189182	0.426048
gene_7099	-0.953354	6.98225	0.0189349	0.426048
gene_338	-0.959173	4.51809	0.0189378	0.426048
gene_7625	0.523513	6.75932	0.0190628	0.426508
gene_506	-2.05243	0.586253	0.0190939	0.426508
gene_4828	-2.29853	2.58477	0.0191975	0.426508
gene_434	1.063	5.63057	0.0193617	0.426508
gene_6208	0.616333	7.38628	0.0194095	0.426508
gene_2963	0.701027	5.15526	0.0195013	0.426508
gene_3074	0.775613	7.39859	0.0195313	0.426508
gene_7866	0.687054	6.65108	0.0195888	0.426508
gene_2218	-1.2608	4.13933	0.0196773	0.426508
gene_7820	-1.03082	7.12707	0.0197319	0.426508
gene_2378	0.606306	7.89125	0.0199552	0.426508
gene_933	0.798955	5.17428	0.0200404	0.426508
gene_4252	1.57944	3.24051	0.0200915	0.426508
gene_3201	1.52011	7.92497	0.0200956	0.426508
gene_2249	-0.748212	4.24314	0.0200965	0.426508
gene_7202	-0.687152	5.73949	0.0201372	0.426508
gene_6397	0.824603	6.77539	0.0202035	0.426508
gene_2724	-0.666335	7.32661	0.0202384	0.426508
gene_928	-1.68941	4.06076	0.0202563	0.426508
gene_2619	1.71675	2.76593	0.0202765	0.426508
gene_6060	1.01763	4.05244	0.0203267	0.426508
gene_4472	0.704749	6.24737	0.0203863	0.426508
gene_5542	-0.738216	7.33745	0.0204062	0.426508
gene_1511	-0.785683	4.83723	0.0204248	0.426508
gene_8094	1.72863	1.38989	0.0204327	0.426508
gene_8174	-1.40308	2.61492	0.0205175	0.426508
gene_8184	-1.3032	4.44261	0.020647	0.426508
gene_2671	-1.37525	3.05789	0.0207501	0.426508
gene_3171	-0.848468	5.60791	0.0208302	0.426508
gene_302	-1.1535	3.50661	0.0208409	0.426508
gene_8846	-0.6481	6.26837	0.0210894	0.426508
gene_7	-1.00895	3.51465	0.0211122	0.426508
gene_1199	1.85629	5.74436	0.0211162	0.426508
gene_362	-1.0678	3.48988	0.0211461	0.426508
gene_2856	0.976033	4.65074	0.0211527	0.426508
gene_4458	0.523885	5.87785	0.0212161	0.426508
gene_1482	0.629259	7.52301	0.0213022	0.426508
gene_7591	-1.10684	4.67221	0.0213885	0.426508
gene_6071	1.0783	6.15773	0.0213975	0.426508
gene_8759	-1.08323	5.32201	0.0214186	0.426508
gene_2934	0.531889	7.32868	0.021447	0.426508
gene_1068	0.734446	7.48126	0.0214691	0.426508
gene_1287	-1.01879	4.54697	0.0215502	0.426508
gene_2283	0.94626	9.01749	0.0215648	0.426508
gene_6313	-0.542535	6.85255	0.0216363	0.426508
gene_7434	-0.936099	6.46225	0.0216936	0.426508
gene_3397	1.19404	8.40373	0.0217258	0.426508
gene_3955	0.754096	5.99212	0.0217698	0.426508
gene_1480	-1.03581	6.1575	0.0219059	0.426508
gene_672	-1.12113	3.26613	0.0219797	0.426508
gene_8821	0.881169	7.56598	0.0220444	0.426508
gene_4078	-1.23	2.94298	0.0220523	0.426508
gene_8082	0.699993	6.64249	0.0221382	0.426508
gene_2772	1.73745	0.813156	0.0221809	0.426508
gene_8072	-1.73962	1.17811	0.0223157	0.426508
gene_2694	-0.84577	6.65185	0.0223319	0.426508
gene_1738	0.91165	5.60362	0.022357	0.426508
gene_4982	0.85741	4.76352	0.0223701	0.426508
gene_5757	-1.22156	6.1092	0.0224113	0.426508
gene_5170	0.811696	3.68284	0.0225038	0.426508
gene_3308	-0.971575	3.15038	0.0226073	0.426508
gene_396	-0.645888	8.27191	0.0226339	0.426508
gene_2292	0.977514	3.8593	0.0226589	0.426508
gene_4484	0.631911	5.46615	0.0227403	0.426508
gene_7070	0.927125	5.02438	0.0227454	0.426508
gene_4907	-2.30479	0.0960654	0.0227564	0.426508
gene_6215	-0.552017	6.69929	0.0227639	0.426508
gene_5501	-0.679887	7.32947	0.0227697	0.426508
gene_7724	1.57726	9.7947	0.0227714	0.426508
gene_7036	1.6498	1.57415	0.0228024	0.426508
gene_2039	-0.679398	9.2017	0.0229461	0.426508
gene_7586	0.55419	8.31587	0.0229491	0.426508
gene_2355	-0.657205	7.51514	0.0229528	0.426508
gene_8261	-0.559213	6.10483	0.0229672	0.426508
gene_299	0.584286	5.91172	0.0229938	0.426508
gene_737	-1.07787	3.1179	0.0230079	0.426508
gene_4819	-0.679744	8.12517	0.0230132	0.426508
gene_1320	-0.617621	5.49038	0.0231287	0.427669
gene_2713	0.996485	3.40127	0.0232573	0.42816
gene_3679	1.7734	1.75506	0.0232926	0.42816
gene_8663	1.02429	7.53655	0.023412	0.42816
gene_585	0.617313	5.71844	0.023412	0.42816
gene_4837	-0.94837	5.04349	0.0234196	0.42816
gene_569	0.60997	5.94133	0.0236625	0.431627
gene_251	1.33628	7.36042	0.0238507	0.432187
gene_518	0.646068	6.25514	0.023868	0.432187
gene_7135	-0.670118	6.28294	0.0239265	0.432187
gene_6257	-0.916218	3.94773	0.0239666	0.432187
gene_7690	0.535963	6.82188	0.024118	0.432187
gene_4727	1.568	1.48796	0.0241708	0.432187
gene_4800	-0.984685	4.17978	0.0241781	0.432187
gene_4402	-0.760643	4.83349	0.0241986	0.432187
gene_4491	-1.80989	0.583247	0.0242558	0.432187
gene_3635	-1.31256	4.18309	0.0243051	0.432187
gene_4320	-0.971834	5.36439	0.0243903	0.432187
gene_5817	0.603424	6.57622	0.0244637	0.432187
gene_246	-1.70863	0.821906	0.0244683	0.432187
gene_1102	-0.966743	3.45732	0.0244741	0.432187
gene_6074	0.868092	3.83912	0.0245301	0.432187
gene_41	-0.643449	7.7176	0.024547	0.432187
gene_121	1.03267	2.42451	0.0247013	0.433266
gene_4096	0.707118	4.74895	0.0247544	0.433266
gene_2489	-1.75928	1.36319	0.0247941	0.433266
gene_4091	-1.05829	3.01613	0.0248347	0.433266
gene_7034	-1.95921	1.39068	0.0248758	0.433266
gene_4935	1.70696	7.75212	0.024934	0.433348
gene_2561	0.456976	6.03145	0.0250179	0.433614
gene_7901	0.476881	6.92333	0.0251599	0.433614
gene_582	0.767304	8.00284	0.0251749	0.433614
gene_2010	0.746504	5.0208	0.0252734	0.433614
gene_2244	-0.912076	8.13336	0.0252785	0.433614
gene_4422	2.37399	0.610012	0.0253456	0.433614
gene_8281	-1.04981	6.49751	0.0253501	0.433614
gene_5021	0.627762	6.19065	0.0253776	0.433614
gene_2854	-1.41562	1.81735	0.0256502	0.433918
gene_2023	-1.75493	1.60166	0.0257135	0.433918
gene_7479	-0.881146	7.7526	0.0257185	0.433918
gene_7064	0.890421	8.72	0.0257672	0.433918
gene_4628	1.03927	3.47848	0.0257762	0.433918
gene_7347	1.95975	-0.335134	0.0259162	0.433918
gene_7784	0.944615	3.82895	0.0259319	0.433918
gene_7967	1.33535	5.6301	0.0259568	0.433918
gene_4535	-1.06833	4.80026	0.0259804	0.433918
gene_745	-0.65568	6.12853	0.0260178	0.433918
gene_2853	-1.19236	3.15978	0.0260251	0.433918
gene_7941	-0.625015	8.94073	0.0260818	0.433918
gene_5536	-0.738815	4.9271	0.0261571	0.433918
gene_1464	-0.801234	4.34172	0.0261711	0.433918
gene_8051	1.14593	9.60289	0.0262131	0.433918
gene_2320	-0.967401	3.63254	0.0262526	0.433918
gene_4048	2.10745	1.75771	0.0263351	0.434097
gene_1545	0.679203	7.70034	0.0263991	0.434097
gene_8733	0.460564	6.18926	0.0264465	0.434097
gene_2717	-0.789312	7.81882	0.0264977	0.434097
gene_3065	-1.15993	4.48256	0.0265835	0.434097
gene_2114	-1.99195	-0.733619	0.0265901	0.434097
gene_1172	0.678612	5.37299	0.0266746	0.434097
gene_3239	0.729974	4.5827	0.0267783	0.434097
gene_7128	-0.911508	3.84538	0.026934	0.434097
gene_4679	-0.910307	7.57938	0.0270481	0.434097
gene_6525	-1.144	4.81302	0.0271043	0.434097
gene_2986	-0.773484	4.34022	0.027121	0.434097
gene_7964	-0.728881	6.22911	0.0271272	0.434097
gene_1576	-0.632507	5.40108	0.0271577	0.434097
gene_1266	-1.16197	3.3709	0.0272576	0.434097
gene_4018	0.968117	6.18111	0.0273261	0.434097
gene_8093	1.1148	3.79411	0.0273436	0.434097
gene_4565	-1.57372	1.44203	0.0273456	0.434097
gene_4584	-1.58125	1.97851	0.0274417	0.434097
gene_6488	0.614099	6.32457	0.0274465	0.434097
gene_3094	-0.868894	6.17004	0.0274738	0.434097
gene_5431	0.650977	5.20917	0.0274926	0.434097
gene_52	-0.539744	6.00969	0.0275514	0.434097
gene_6301	0.552361	7.15526	0.0275699	0.434097
gene_2418	-0.778371	5.52882	0.0276034	0.434097
gene_4372	-2.37347	-0.000584042	0.0276985	0.434749
gene_1927	0.726022	4.75295	0.0277553	0.434797
gene_6542	-0.917638	7.51736	0.0281781	0.440568
gene_3249	0.675373	5.30494	0.0283217	0.441478
gene_830	-0.629668	5.10108	0.0283862	0.441478
gene_6406	-1.81257	2.16185	0.028468	0.441478
gene_2090	-0.925257	7.98963	0.0285135	0.441478
gene_8745	0.838447	5.13769	0.0285364	0.441478
gene_941	-1.65443	2.26365	0.0286409	0.441478
gene_631	-1.82594	-0.47316	0.0286899	0.441478
gene_7904	1.13411	2.78748	0.0288798	0.441478
gene_1514	-1.06064	2.74474	0.0288826	0.441478
gene_2615	0.429615	6.18779	0.0289359	0.441478
gene_3832	2.13	2.41454	0.028938	0.441478
gene_8691	0.611864	6.56807	0.0290365	0.441478
gene_4083	-1.46216	2.272	0.0290769	0.441478
gene_7283	-0.723792	5.7364	0.0291067	0.441478
gene_5343	1.96724	-0.0181417	0.0291134	0.441478
gene_802	-0.683131	5.47545	0.0291754	0.441478
gene_5454	-1.78598	0.543909	0.0292022	0.441478
gene_8113	0.605792	6.56388	0.0292193	0.441478
gene_4235	-1.58576	-0.424029	0.0293015	0.441478
gene_3010	2.14854	-0.0337701	0.0293966	0.441478
gene_5799	0.737999	5.16057	0.0294371	0.441478
gene_5912	0.56524	4.94423	0.0294531	0.441478
gene_7500	0.575805	5.09518	0.0295458	0.441478
gene_7611	-1.16989	5.00819	0.0296419	0.441478
gene_968	-1.06698	4.45296	0.029759	0.441478
gene_8575	0.517959	6.47169	0.0297776	0.441478
gene_3154	-0.626185	7.63893	0.029786	0.441478
gene_5771	-0.549981	5.74984	0.0299283	0.441478
gene_1622	0.563557	4.96352	0.029931	0.441478
gene_3599	-1.12604	7.20212	0.0299839	0.441478
gene_1888	0.632932	7.53595	0.0299955	0.441478
gene_751	-0.580152	4.99399	0.030072	0.441478
gene_8139	-1.152	4.02539	0.0303585	0.441478
gene_3819	2.53524	4.02885	0.0303719	0.441478
gene_8650	0.678465	8.20295	0.0304096	0.441478
gene_1114	-0.510326	6.13086	0.030469	0.441478
gene_6290	-0.860368	3.99687	0.0304752	0.441478
gene_5825	0.684233	4.09572	0.0306084	0.441478
gene_5135	-0.566184	7.40436	0.0306537	0.441478
gene_5558	0.700052	5.76322	0.0306705	0.441478
gene_2224	-0.529949	5.53521	0.0307682	0.441478
gene_4555	0.795454	6.97626	0.0307755	0.441478
gene_3521	-0.905779	8.36463	0.0307877	0.441478
gene_325	-0.884646	6.09732	0.0308081	0.441478
gene_8203	-0.475053	8.72658	0.0308929	0.441478
gene_3563	-1.13625	5.12802	0.030894	0.441478
gene_4854	-1.37603	3.53625	0.0310877	0.441478
gene_6892	0.533697	5.72825	0.0311284	0.441478
gene_8207	0.974777	7.57275	0.031235	0.441478
gene_2379	-1.90074	4.26835	0.0312442	0.441478
gene_5369	-1.65103	2.88974	0.0313083	0.441478
gene_7892	0.876568	3.23204	0.0313115	0.441478
gene_2693	-0.790165	8.72103	0.0313272	0.441478
gene_3873	0.474063	6.12677	0.0313659	0.441478
gene_7903	0.675846	9.26464	0.0313902	0.441478
gene_1000	0.525412	6.90655	0.0313963	0.441478
gene_5060	-1.02713	5.7374	0.0314507	0.441478
gene_4137	-2.10253	3.47087	0.0314611	0.441478
gene_4046	0.699555	8.45648	0.0314702	0.441478
gene_5480	0.651237	7.98876	0.0315069	0.441478
gene_7152	-0.594108	5.17039	0.0317822	0.444567
gene_8652	0.705961	6.20019	0.0319042	0.44486
gene_2784	-1.1788	2.12007	0.0319612	0.44486
gene_3268	0.625957	7.10829	0.0320173	0.44486
gene_2162	2.20106	2.61353	0.0320229	0.44486
gene_764	1.82482	2.62177	0.0323625	0.446768
gene_5555	-0.65121	7.16733	0.0324263	0.446768
gene_3852	-1.3489	5.61887	0.0324881	0.446768
gene_3520	-0.845851	4.89582	0.0325159	0.446768
gene_5123	0.556765	8.30336	0.0325522	0.446768
gene_6927	0.537272	4.71146	0.03268	0.446768
gene_6116	1.59141	5.28316	0.0328534	0.446768
gene_3569	-1.28319	2.04078	0.032981	0.446768
gene_5154	0.755099	6.349	0.0330536	0.446768
gene_1173	0.473397	7.35723	0.0331062	0.446768
gene_1823	0.691423	7.91752	0.0331132	0.446768
gene_7600	0.743521	7.94953	0.033252	0.446768
gene_5524	0.46417	5.44916	0.0332562	0.446768
gene_695	-0.566228	5.97221	0.0332666	0.446768
gene_6382	-1.05389	4.88501	0.033376	0.446768
gene_8732	0.79073	5.76008	0.0333821	0.446768
gene_2287	0.478578	5.29479	0.0334232	0.446768
gene_8446	0.752375	8.84074	0.0334273	0.446768
gene_5285	-0.749232	4.98527	0.0334364	0.446768
gene_548	0.679083	7.48365	0.0334702	0.446768
gene_3085	-0.583844	6.01705	0.0334747	0.446768
gene_1515	-1.4097	4.57072	0.0335072	0.446768
gene_3715	0.596847	5.47076	0.0335799	0.446768
gene_4973	-1.10789	4.39492	0.0336211	0.446768
gene_8085	0.805752	9.4519	0.0336969	0.446768
gene_8121	-0.739813	10.0593	0.0339535	0.446768
gene_3509	0.740813	4.99589	0.033971	0.446768
gene_1501	0.859749	4.31501	0.0340118	0.446768
gene_6067	0.61743	7.49653	0.0340997	0.446768
gene_954	0.578051	8.78988	0.0341291	0.446768
gene_2905	-1.2353	3.1229	0.0342005	0.446768
gene_4279	1.9011	1.27846	0.0343302	0.446768
gene_1400	-0.765605	4.51439	0.0343348	0.446768
gene_1488	-1.15757	3.02012	0.0343356	0.446768
gene_4568	-0.711759	6.2538	0.0345127	0.446768
gene_8378	-0.750502	6.42972	0.0345483	0.446768
gene_602	1.97365	2.01724	0.0346606	0.446768
gene_3473	1.19497	3.09131	0.0349165	0.446768
gene_2788	0.572331	7.06681	0.0349316	0.446768
gene_4998	-1.3324	4.47533	0.0349506	0.446768
gene_804	-0.598161	7.21569	0.0350302	0.446768
gene_2866	-0.905679	5.68503	0.0350878	0.446768
gene_7050	0.995361	13.179	0.0351047	0.446768
gene_7117	0.632128	10.0555	0.0351614	0.446768
gene_3168	0.851656	7.70443	0.0352061	0.446768
gene_7686	-0.582831	7.24071	0.0352244	0.446768
gene_710	0.758938	5.74269	0.0352617	0.446768
gene_852	-0.526238	7.14357	0.0353044	0.446768
gene_6560	-1.31498	3.2745	0.0353249	0.446768
gene_3885	0.580021	6.50573	0.0353372	0.446768
gene_5452	-1.19535	2.99007	0.0353558	0.446768
gene_2832	-1.51901	3.79871	0.0353966	0.446768
gene_1045	-0.779972	6.02764	0.0354667	0.446768
gene_5549	-0.566692	7.62753	0.0355175	0.446768
gene_5959	0.917995	7.61	0.0355228	0.446768
gene_6305	-0.428968	7.85879	0.0355232	0.446768
gene_7490	0.583467	4.65412	0.0355487	0.446768
gene_4842	0.546284	7.51435	0.0357083	0.446768
gene_6122	-1.13547	3.84289	0.0357449	0.446768
gene_4430	-1.35874	5.05731	0.0358867	0.446768
gene_7981	1.66061	3.50638	0.036023	0.446768
gene_2775	0.874697	3.6731	0.0360533	0.446768
gene_8666	0.539501	5.785	0.036172	0.446768
gene_1376	-1.0071	4.45924	0.0363675	0.446768
gene_1166	1.02886	4.66992	0.036404	0.446768
gene_5734	0.481635	6.17651	0.0364106	0.446768
gene_5333	-1.17631	2.46634	0.0364943	0.446768
gene_3001	-0.620517	4.26719	0.0365763	0.446768
gene_895	0.482735	6.1243	0.0366397	0.446768
gene_8249	0.549807	7.32873	0.0367006	0.446768
gene_6593	0.467692	6.50237	0.0367056	0.446768
gene_8598	0.527466	5.20857	0.0367299	0.446768
gene_6951	0.796711	5.7481	0.0369336	0.446768
gene_4028	-0.628487	5.11994	0.037	0.446768
gene_7137	0.838162	9.54456	0.0370082	0.446768
gene_5656	0.971088	4.01478	0.0370772	0.446768
gene_3270	0.802564	3.93173	0.0371071	0.446768
gene_6937	0.77587	4.34638	0.0371797	0.446768
gene_8644	0.641273	6.20033	0.0372144	0.446768
gene_5920	0.72046	3.21765	0.0372666	0.446768
gene_8567	1.41191	4.61717	0.0373203	0.446768
gene_5950	-0.748289	4.48626	0.0373329	0.446768
gene_3346	-1.59183	6.11702	0.0373782	0.446768
gene_7936	0.746695	4.62776	0.0374697	0.446768
gene_6557	-0.667259	4.9702	0.0375312	0.446768
gene_743	0.912694	3.99478	0.0375452	0.446768
gene_8140	-0.90513	5.612	0.0376029	0.446768
gene_4549	-1.5716	1.26006	0.0376068	0.446768
gene_5839	-1.01293	5.25494	0.0376477	0.446768
gene_5731	-0.798497	4.74266	0.0376823	0.446768
gene_8089	0.493233	7.41978	0.037722	0.446768
gene_151	0.531064	6.23795	0.0378438	0.446768
gene_3109	-0.729937	4.38639	0.0378685	0.446768
gene_8471	-1.3601	3.78368	0.0378756	0.446768
gene_7207	0.689612	6.88433	0.0378906	0.446768
gene_5294	-0.845107	4.65817	0.0379373	0.446768
gene_5102	0.994453	5.01824	0.0379552	0.446768
gene_8696	-0.623722	5.04765	0.0380652	0.446768
gene_3748	-0.503222	5.88224	0.0380839	0.446768
gene_7153	-1.08419	5.12563	0.0380902	0.446768
gene_1766	-1.13652	6.88352	0.0381036	0.446768
gene_1868	0.607413	8.82178	0.0381047	0.446768
gene_4862	-0.556014	5.35491	0.0382335	0.446768
gene_4262	0.455704	5.68794	0.038304	0.446768
gene_6219	-1.52188	2.86229	0.03835	0.446768
gene_2795	-0.960856	6.81837	0.0384432	0.446768
gene_7959	0.372206	7.37123	0.0384732	0.446768
gene_6187	0.965549	6.17308	0.0385855	0.446768
gene_7471	0.690399	5.68481	0.0386214	0.446768
gene_1739	0.878512	4.49144	0.0386803	0.446768
gene_407	0.781723	3.88373	0.0387092	0.446768
gene_8217	0.462987	5.98966	0.0388057	0.446768
gene_7872	-0.721192	5.03159	0.0388642	0.446768
gene_8453	0.639699	8.07934	0.0389398	0.446768
gene_6782	1.40863	1.98071	0.0390105	0.446768
gene_8224	0.720339	4.82375	0.0392721	0.446768
gene_6555	1.71259	0.596168	0.0393137	0.446768
gene_332	1.00725	3.88903	0.0393415	0.446768
gene_4595	-0.972843	3.30516	0.0393665	0.446768
gene_8408	-0.695988	5.37585	0.0394072	0.446768
gene_8013	4.17964	3.24219	0.0395711	0.446768
gene_727	0.915858	3.93644	0.0397948	0.446768
gene_6003	-1.76934	-0.519285	0.0398117	0.446768
gene_6033	0.756139	4.42607	0.0398657	0.446768
gene_388	0.562257	5.03386	0.0399083	0.446768
gene_7880	-0.935234	4.95328	0.0399467	0.446768
gene_4735	-0.929468	8.7498	0.0399481	0.446768
gene_5772	0.446734	6.11356	0.0399553	0.446768
gene_5070	1.05939	5.69664	0.0399732	0.446768
gene_7251	-1.43781	1.94023	0.0400314	0.446768
gene_1610	-0.660824	6.6578	0.0400872	0.446768
gene_4685	-0.844501	3.39096	0.0401026	0.446768
gene_3527	-0.468535	6.69144	0.0401123	0.446768
gene_2248	0.510728	5.65531	0.0402224	0.446768
gene_2288	0.89781	5.51095	0.0403465	0.446768
gene_1379	0.472561	6.01736	0.0403605	0.446768
gene_6141	-0.541531	6.00165	0.0404156	0.446768
gene_924	0.421666	7.28116	0.0404195	0.446768
gene_6380	-0.729244	4.17952	0.0404268	0.446768
gene_3988	-0.602592	7.34431	0.0404994	0.446768
gene_7626	-0.746235	9.70151	0.0405081	0.446768
gene_5840	0.680371	4.67643	0.040535	0.446768
gene_7840	0.657645	4.8081	0.0405624	0.446768
gene_3549	-0.506621	6.5664	0.0405908	0.446768
gene_6686	-0.509149	6.54344	0.0405987	0.446768
gene_1983	-0.65112	4.66546	0.0406227	0.446768
gene_3233	-0.777251	4.8581	0.0406519	0.446768
gene_3247	0.588969	5.63656	0.0407676	0.446768
gene_2975	0.536674	6.42333	0.0408016	0.446768
gene_3040	0.760527	11.6315	0.0408017	0.446768
gene_2893	-0.586189	6.18613	0.0409093	0.446768
gene_1048	0.608747	6.36159	0.0409885	0.446768
gene_4663	-1.03003	9.17167	0.0410274	0.446768
gene_1683	0.685576	5.95449	0.0410823	0.446768
gene_375	-0.728669	4.00551	0.0412162	0.446768
gene_1218	-1.65044	2.08744	0.0412616	0.446768
gene_7871	0.665924	8.4833	0.0412855	0.446768
gene_7341	-0.944372	9.29508	0.0413413	0.446768
gene_5783	0.484393	6.99375	0.041342	0.446768
gene_1458	1.15608	5.37692	0.0414444	0.446768
gene_930	1.60526	7.84697	0.0414504	0.446768
gene_7685	0.975437	4.87047	0.0414698	0.446768
gene_8147	0.667611	5.98929	0.0415153	0.446768
gene_5493	-0.680768	4.12105	0.0416155	0.446768
gene_704	-0.683658	6.50988	0.0416209	0.446768
gene_5766	-0.873215	3.37564	0.0416824	0.446768
gene_549	0.370991	5.8877	0.0416938	0.446768
gene_3051	1.43042	2.68956	0.041728	0.446768
gene_5747	-1.03766	4.8249	0.0417571	0.446768
gene_2498	-0.701046	7.89433	0.0418268	0.446768
gene_4254	0.540201	4.8861	0.0418841	0.446768
gene_1215	-0.901169	4.89773	0.0419133	0.446768
gene_5336	-0.701194	5.73644	0.0419197	0.446768
gene_6019	-0.776611	5.82736	0.0420182	0.446768
gene_7256	-0.997492	9.35949	0.0420426	0.446768
gene_3101	-0.566313	7.77859	0.0420513	0.446768
gene_4413	1.28236	4.13891	0.042064	0.446768
gene_5955	1.93854	0.203342	0.0420818	0.446768
gene_7751	1.08449	3.22626	0.0420914	0.446768
gene_5317	0.441924	8.95457	0.0421002	0.446768
gene_8326	0.796614	6.13265	0.0422932	0.446768
gene_137	-0.69296	4.6387	0.0423839	0.446768
gene_3188	0.423126	6.66062	0.0423939	0.446768
gene_4627	1.00914	4.74871	0.0424916	0.446768
gene_4716	-0.740098	4.90023	0.0425704	0.446768
gene_798	0.631556	5.99971	0.0426188	0.446768
gene_7162	1.17724	5.36745	0.0426241	0.446768
gene_2493	2.2677	0.00416464	0.0426253	0.446768
gene_8716	-0.951004	8.8414	0.0426816	0.446768
gene_767	-1.82269	2.39427	0.0427259	0.446768
gene_3161	-0.654167	6.55597	0.0427437	0.446768
gene_943	0.482291	5.15067	0.0427853	0.446768
gene_6392	-0.411957	8.41239	0.0428068	0.446768
gene_2506	-0.504828	6.38505	0.0430134	0.447387
gene_2926	0.930187	7.0414	0.0430247	0.447387
gene_692	-1.22125	9.46959	0.0430318	0.447387
gene_8784	-0.622799	4.65751	0.0430956	0.447476
gene_4846	0.64855	4.54758	0.0433635	0.449681
gene_7062	0.452033	6.14455	0.0434765	0.449772
gene_5764	-0.795762	5.59322	0.0434847	0.449772
gene_6942	-1.17522	3.84756	0.0435389	0.449772
gene_8436	-0.534442	5.6368	0.0437308	0.450358
gene_5425	-2.27456	-0.223458	0.0437669	0.450358
gene_7563	-0.761388	5.042	0.0437937	0.450358
gene_759	0.948866	7.06541	0.0438715	0.450358
gene_1493	0.443175	6.66229	0.0438737	0.450358
gene_5622	-1.51985	1.89918	0.0439458	0.450485
gene_1452	0.720413	9.05696	0.0439972	0.450485
gene_3335	1.31668	2.98708	0.0440583	0.45054
gene_1677	-1.15898	8.95831	0.044203	0.451254
gene_5903	-0.808814	4.96925	0.0442395	0.451254
gene_2131	-0.922958	2.889	0.0443957	0.452278
gene_5334	-0.682911	6.83931	0.0444792	0.452559
gene_383	0.483868	5.35166	0.0445598	0.452811
gene_5079	0.496521	6.56027	0.0447157	0.453825
gene_7570	-1.40364	4.62976	0.0447983	0.454047
gene_6471	-0.936452	4.19462	0.0448497	0.454047
gene_6965	-1.04213	3.035	0.0449786	0.454692
gene_723	-1.70511	0.9108	0.0450257	0.454692
gene_676	-0.945065	8.32389	0.0451843	0.455269
gene_1959	1.64992	2.40797	0.0451953	0.455269
gene_113	1.26031	3.22113	0.045263	0.455385
gene_4240	0.489626	8.73622	0.0453345	0.455478
gene_2707	0.400815	6.8173	0.0454283	0.455478
gene_6028	-0.607554	5.20393	0.045441	0.455478
gene_1711	-0.928102	8.81878	0.0455536	0.455542
gene_7594	-1.01102	6.86626	0.0455964	0.455542
gene_1360	0.926687	5.085	0.0458948	0.455542
gene_2613	-0.892204	7.7464	0.0460585	0.455542
gene_8007	1.43251	5.42922	0.0461082	0.455542
gene_2254	0.754428	5.70994	0.0461102	0.455542
gene_5557	-0.830156	6.9168	0.0461519	0.455542
gene_680	-0.555951	5.80597	0.0461814	0.455542
gene_8150	0.742978	4.3901	0.0462008	0.455542
gene_222	0.663499	7.84159	0.0462461	0.455542
gene_3556	-1.0198	4.49804	0.0462656	0.455542
gene_5814	-2.71099	0.873778	0.0462886	0.455542
gene_3686	1.0279	2.78025	0.0464366	0.455542
gene_5062	1.25954	2.14188	0.0464473	0.455542
gene_36	1.90333	1.27828	0.0464809	0.455542
gene_4742	-1.01642	2.43584	0.0465601	0.455542
gene_4636	-0.957041	4.44903	0.0466394	0.455542
gene_257	-0.560329	7.16819	0.0467057	0.455542
gene_836	1.32043	4.34785	0.0468016	0.455542
gene_6933	-0.711428	6.56349	0.046857	0.455542
gene_3301	0.772169	5.66336	0.0468732	0.455542
gene_3685	-1.26876	3.49311	0.0469167	0.455542
gene_5606	-0.629018	6.1883	0.0469611	0.455542
gene_1334	-0.677151	4.89097	0.046975	0.455542
gene_3082	0.525317	5.4127	0.0470422	0.455542
gene_7354	0.430695	7.27303	0.0471264	0.455542
gene_39	-1.71836	2.31292	0.0471826	0.455542
gene_766	-0.790976	6.1367	0.0472065	0.455542
gene_5996	0.782659	5.99171	0.047211	0.455542
gene_1133	-0.492302	5.55219	0.047291	0.455542
gene_5326	-0.817135	5.67646	0.0472992	0.455542
gene_3793	1.58694	7.78266	0.0473394	0.455542
gene_1920	0.472322	6.12041	0.0475344	0.455542
gene_7074	0.668829	5.21702	0.0475468	0.455542
gene_2098	1.03302	4.57919	0.0475932	0.455542
gene_3106	0.643646	6.72311	0.0477198	0.455542
gene_376	0.731072	6.58332	0.047797	0.455542
gene_7665	0.671928	7.71494	0.0478385	0.455542
gene_3633	-0.700508	6.44917	0.0478808	0.455542
gene_1180	0.641098	7.5122	0.0478919	0.455542
gene_6302	-0.905467	4.71004	0.0479165	0.455542
gene_1470	-0.683997	4.21226	0.0479776	0.455542
gene_8313	-0.742968	4.55194	0.0480399	0.455542
gene_4695	-0.853467	4.27177	0.048041	0.455542
gene_105	-0.87355	5.31737	0.0480803	0.455542
gene_8125	-1.12097	2.31851	0.0481364	0.455542
gene_4134	-0.959958	6.60641	0.0481748	0.455542
gene_7847	-0.447655	6.4703	0.0482137	0.455542
gene_7963	1.22711	9.63714	0.04825	0.455542
gene_6433	1.36952	9.96506	0.0482597	0.455542
gene_3974	-0.839767	4.65879	0.0483307	0.455682
gene_4673	0.621254	7.21292	0.0484337	0.456122
gene_1088	-0.607185	6.23405	0.0486252	0.456866
gene_4060	0.991081	6.48084	0.0486693	0.456866
gene_1290	-0.518093	5.14486	0.0487246	0.456866
gene_4783	-0.538596	6.04046	0.0490129	0.456866
gene_5459	-1.24924	5.63966	0.0490222	0.456866
gene_7425	0.967757	6.26157	0.0490954	0.456866
gene_3811	-0.819117	4.61928	0.0491327	0.456866
gene_4499	0.59026	4.95011	0.0491816	0.456866
gene_5502	-0.628841	7.05319	0.0492066	0.456866
gene_4110	1.13552	3.42598	0.0492438	0.456866
gene_994	-0.69966	4.99672	0.0492815	0.456866
gene_2837	-0.558813	11.8059	0.04943	0.456866
gene_2782	0.617056	7.31679	0.0495034	0.456866
gene_701	-1.13292	3.71648	0.0495221	0.456866
gene_1891	0.569716	7.67435	0.0495692	0.456866
gene_2621	-0.833755	4.38322	0.0496302	0.456866
gene_570	0.530743	7.10187	0.0496659	0.456866
gene_4404	1.12542	1.85638	0.0496816	0.456866
gene_6438	-0.875959	3.52726	0.0498621	0.456866
gene_2170	1.6965	1.2286	0.0498781	0.456866
gene_4222	0.562855	7.40706	0.0499418	0.456866
gene_1660	1.13529	10.235	0.0499753	0.456866
gene_1751	-0.474379	7.2482	0.0500048	0.456866
gene_1117	-0.462352	7.49951	0.050114	0.456866
gene_3260	0.496409	5.45189	0.0501237	0.456866
gene_5200	-0.54097	5.73528	0.0501248	0.456866
gene_3255	1.06079	13.1758	0.0501362	0.456866
gene_4928	1.03602	3.5955	0.0501696	0.456866
gene_7590	0.57916	6.82285	0.0502107	0.456866
gene_6980	-1.00168	2.94838	0.0505114	0.456866
gene_6337	1.45103	0.824352	0.0505462	0.456866
gene_781	-1.07187	5.28537	0.0505467	0.456866
gene_8429	0.39134	6.61123	0.0506066	0.456866
gene_7416	-0.916647	8.24734	0.0506573	0.456866
gene_2932	-0.781754	7.76466	0.0507329	0.456866
gene_7727	0.456616	6.66396	0.0507805	0.456866
gene_6343	0.896104	3.25928	0.0508005	0.456866
gene_2176	-0.997458	4.48307	0.0508046	0.456866
gene_8012	1.62732	1.86137	0.0509911	0.456866
gene_4741	-0.736049	5.02146	0.0510039	0.456866
gene_648	-1.86179	0.131783	0.0510739	0.456866
gene_7177	0.442748	9.25834	0.0510958	0.456866
gene_6276	-1.45953	3.83284	0.0510995	0.456866
gene_3967	0.801438	3.7952	0.0511124	0.456866
gene_1605	1.39732	2.16884	0.0511174	0.456866
gene_6234	-0.569247	9.38236	0.0511858	0.456866
gene_6457	-0.629502	8.72713	0.0512107	0.456866
gene_1014	1.72233	1.15914	0.051254	0.456866
gene_8189	-0.833677	9.13881	0.0512769	0.456866
gene_862	0.795949	4.70832	0.051769	0.460479
gene_7555	-0.67157	6.05691	0.051796	0.460479
gene_343	-0.499144	5.84568	0.0519417	0.461267
gene_1363	0.537349	6.94486	0.0520624	0.46175
gene_4653	-1.70863	-0.47316	0.0521248	0.46175
gene_1769	-0.499511	5.27419	0.052199	0.46175
gene_8633	0.73917	6.67497	0.0522241	0.46175
gene_2246	0.982756	7.72709	0.0523349	0.461843
gene_4745	0.581738	6.92479	0.0523783	0.461843
gene_8643	-1.60975	0.437714	0.0525016	0.461843
gene_8730	-0.857337	4.61153	0.0525185	0.461843
gene_1022	-0.585825	6.24215	0.0525873	0.461843
gene_6808	-1.75177	-0.1208	0.0526017	0.461843
gene_7999	0.478733	8.49749	0.0526918	0.461843
gene_7412	0.413223	7.39885	0.0527615	0.461843
gene_7401	1.82451	1.00738	0.0527856	0.461843
gene_5848	-1.351	4.13487	0.0528072	0.461843
gene_2695	-1.19962	3.29833	0.0529173	0.461843
gene_255	-2.25937	0.327605	0.0530091	0.461843
gene_1403	0.406155	7.13319	0.0532679	0.461843
gene_2541	-0.573876	5.9138	0.0532705	0.461843
gene_6797	1.33726	3.22771	0.0532874	0.461843
gene_7691	-0.469657	5.29654	0.0532908	0.461843
gene_5045	-1.59316	2.6394	0.0532951	0.461843
gene_3105	-0.800216	5.91512	0.0533036	0.461843
gene_177	-0.602064	5.2674	0.0533488	0.461843
gene_8778	-1.54254	0.300816	0.0534313	0.461843
gene_577	0.543276	4.42861	0.0534776	0.461843
gene_6630	-0.658999	7.12908	0.0534892	0.461843
gene_1629	-0.99355	2.67876	0.0537831	0.462821
gene_7565	-0.477042	6.8983	0.0537985	0.462821
gene_6653	-0.675628	5.54769	0.053844	0.462821
gene_3199	0.552837	6.4353	0.0539307	0.462821
gene_1670	0.503128	7.52646	0.0540094	0.462821
gene_6082	-1.25651	1.66172	0.0540565	0.462821
gene_4988	0.408716	7.16689	0.0540589	0.462821
gene_6245	-1.26838	2.34319	0.0541261	0.462821
gene_4179	0.472694	6.79291	0.0543035	0.462821
gene_3979	-0.776174	5.76243	0.0544026	0.462821
gene_4051	0.775635	5.1351	0.0544396	0.462821
gene_2406	-0.719266	6.49859	0.0544477	0.462821
gene_7800	-1.14484	2.87861	0.0544501	0.462821
gene_5122	0.904365	4.07724	0.0544856	0.462821
gene_5131	-0.957926	3.59444	0.0546013	0.462821
gene_1345	0.512114	5.25367	0.0546563	0.462821
gene_6376	-1.09596	4.09653	0.0547	0.462821
gene_1303	-0.813412	10.0341	0.0547364	0.462821
gene_7957	1.12597	3.01138	0.0548234	0.462821
gene_7955	2.54192	0.778597	0.054936	0.462821
gene_2659	0.463679	7.44509	0.0551178	0.462821
gene_3831	1.81427	1.89913	0.0551588	0.462821
gene_4807	-0.69479	5.48871	0.0551779	0.462821
gene_877	1.06994	7.02574	0.0551787	0.462821
gene_6944	-1.92692	2.05846	0.0551865	0.462821
gene_5426	-0.753678	4.93436	0.0552207	0.462821
gene_6683	0.902715	3.79411	0.0552257	0.462821
gene_780	0.622835	8.60514	0.0552281	0.462821
gene_5007	0.507599	6.14193	0.0552845	0.462821
gene_1033	-1.01763	6.8072	0.0553483	0.462821
gene_2879	-1.04525	4.47906	0.0555081	0.462821
gene_3965	0.648745	8.21521	0.0555661	0.462821
gene_3006	-0.706398	5.02981	0.055602	0.462821
gene_5267	-0.472734	7.0528	0.0557227	0.462821
gene_2100	1.61107	9.69142	0.0557762	0.462821
gene_4792	0.532622	9.41524	0.0558161	0.462821
gene_7523	-0.456894	5.17859	0.0558686	0.462821
gene_1474	0.398625	6.33287	0.0559145	0.462821
gene_1809	0.738048	4.34872	0.0559708	0.462821
gene_4509	-1.5927	-0.212701	0.0560111	0.462821
gene_1898	-1.15006	4.49117	0.0560547	0.462821
gene_3947	-0.73194	4.65524	0.0562095	0.462821
gene_8774	0.344508	6.84774	0.056261	0.462821
gene_1688	0.551627	8.31327	0.0562666	0.462821
gene_3973	-1.18862	3.9158	0.0562826	0.462821
gene_2744	-0.937818	8.29121	0.0563219	0.462821
gene_5015	0.529466	7.68733	0.05634	0.462821
gene_3044	0.507432	6.31909	0.0564379	0.462821
gene_8123	-1.07393	3.45345	0.0564543	0.462821
gene_2632	-1.69906	1.30654	0.056523	0.462821
gene_2123	-0.981315	4.47214	0.0566069	0.462821
gene_2443	-0.732168	8.05502	0.0566479	0.462821
gene_5832	0.6388	3.98772	0.0567068	0.462821
gene_3805	0.592755	4.11201	0.0567311	0.462821
gene_2447	0.825228	5.02123	0.0567454	0.462821
gene_1398	-0.492958	5.10856	0.0568453	0.462946
gene_1591	1.21345	1.66729	0.0568751	0.462946
gene_4872	0.58671	5.59327	0.0569759	0.463301
gene_3937	-0.563127	5.57416	0.0570546	0.463476
gene_2046	0.928194	4.04019	0.0571987	0.46392
gene_7379	-0.397028	7.1616	0.0573803	0.46392
gene_6186	-0.522751	5.25046	0.0575372	0.46392
gene_4600	0.795363	8.69769	0.0575934	0.46392
gene_63	-1.74023	-0.0664843	0.0576735	0.46392
gene_1976	-1.50986	2.07015	0.0576965	0.46392
gene_931	-0.484924	6.19364	0.0577749	0.46392
gene_3312	0.498039	5.65218	0.0577949	0.46392
gene_1060	-1.24825	4.32882	0.0578894	0.46392
gene_3699	-0.973853	3.71368	0.0579452	0.46392
gene_1138	-0.908747	5.49297	0.0579699	0.46392
gene_4790	-1.74891	0.907502	0.0580027	0.46392
gene_1810	-0.703204	5.04089	0.0580442	0.46392
gene_5063	0.878387	3.59807	0.0580572	0.46392
gene_6935	0.70595	5.38362	0.0580965	0.46392
gene_823	-1.16554	2.50717	0.0580971	0.46392
gene_2631	0.709588	5.44498	0.0581312	0.46392
gene_8557	-0.776831	10.0661	0.0582175	0.46392
gene_713	-0.879505	4.73629	0.0583706	0.46392
gene_6375	-0.5015	6.58117	0.0584438	0.46392
gene_1827	0.607367	7.30653	0.0584856	0.46392
gene_5609	1.37615	5.66166	0.0585158	0.46392
gene_2205	-0.588409	5.19341	0.0585917	0.46392
gene_8057	0.604259	6.3396	0.0586204	0.46392
gene_1814	-0.404616	7.63571	0.0586474	0.46392
gene_6384	0.438595	9.40995	0.0587343	0.46392
gene_7514	-1.79368	1.00087	0.0587489	0.46392
gene_1130	0.637597	6.47834	0.0588543	0.46392
gene_4009	-1.09956	9.60405	0.0589156	0.46392
gene_4389	0.463256	7.67345	0.0589239	0.46392
gene_7313	-1.65228	3.77899	0.0589433	0.46392
gene_8038	-1.03432	4.59585	0.0591256	0.46392
gene_7275	0.697132	7.86489	0.0591436	0.46392
gene_6777	0.590627	10.5306	0.0591663	0.46392
gene_4548	-1.23292	2.32587	0.0592578	0.46392
gene_3645	0.421771	6.61303	0.0592814	0.46392
gene_921	-0.557375	4.78032	0.0592878	0.46392
gene_4651	0.895799	4.60111	0.0593069	0.46392
gene_6576	-1.60641	0.916474	0.0593432	0.46392
gene_1143	0.531937	7.17855	0.0594218	0.464078
gene_3836	-0.76635	3.99351	0.0594781	0.464078
gene_8538	0.615052	8.43299	0.0596237	0.464759
gene_4123	-1.25451	3.22975	0.0596801	0.464759
gene_5013	-1.00629	8.54265	0.059843	0.46558
gene_2092	0.494947	7.57868	0.0599405	0.465891
gene_7978	0.74479	3.66028	0.0602668	0.467411
gene_2499	0.974531	2.44091	0.0602996	0.467411
gene_8231	0.663219	5.94993	0.0603296	0.467411
gene_5530	1.32595	7.108	0.060367	0.467411
gene_669	-2.09262	-0.0013724	0.0604917	0.467929
gene_4276	0.769099	3.4277	0.0607036	0.469018
gene_2389	-0.583851	9.31588	0.0607697	0.469018
gene_6824	0.601613	5.07951	0.0608061	0.469018
gene_8724	-0.926499	3.45189	0.0609435	0.469058
gene_7061	-1.12821	1.60269	0.0609988	0.469058
gene_1552	-0.634048	5.59867	0.0610985	0.469058
gene_6835	-1.6763	0.799386	0.0611326	0.469058
gene_2507	-1.83456	4.06309	0.0611615	0.469058
gene_7372	0.607272	5.18819	0.0611672	0.469058
gene_3575	-1.40278	3.23343	0.06125	0.469058
gene_5945	0.891379	6.33552	0.0613168	0.469058
gene_7813	-0.552484	5.20526	0.0613774	0.469058
gene_7260	-0.413699	6.38328	0.0614574	0.469058
gene_134	-1.02898	3.11529	0.0614577	0.469058
gene_4884	-0.735278	4.13087	0.0615063	0.469058
gene_1601	-0.485514	6.74269	0.061594	0.469285
gene_4119	1.69182	3.12577	0.0618384	0.470523
gene_7143	-0.407963	6.07262	0.0618727	0.470523
gene_4971	-1.0578	7.50724	0.0621089	0.471876
gene_2636	0.608884	6.59936	0.0622642	0.472457
gene_6389	0.453036	7.24984	0.062302	0.472457
gene_6716	-1.16901	5.35483	0.0624624	0.47282
gene_8369	0.606087	8.73357	0.0624666	0.47282
gene_1676	0.426529	6.68977	0.0626614	0.473758
gene_6256	-1.46476	3.15779	0.062715	0.473758
gene_4283	-0.631609	5.24992	0.0627857	0.473758
gene_2370	-0.888819	5.34823	0.0628476	0.473758
gene_1730	0.376662	6.10248	0.062883	0.473758
gene_5796	1.22037	5.38743	0.0630619	0.474409
gene_3165	-1.26366	2.74764	0.0631255	0.474409
gene_8145	0.363511	6.93769	0.0631452	0.474409
gene_6550	1.32447	1.4249	0.0632952	0.474728
gene_567	-0.89897	5.82652	0.0633233	0.474728
gene_1120	-0.906011	10.5143	0.0633884	0.474728
gene_8365	1.00331	3.62107	0.0635457	0.474728
gene_183	-0.976529	3.93662	0.0636945	0.474728
gene_2539	-1.0431	8.75385	0.0637289	0.474728
gene_4440	1.23304	2.03668	0.0638456	0.474728
gene_5019	0.459589	5.61737	0.0638868	0.474728
gene_7343	0.512728	8.95593	0.0639345	0.474728
gene_3851	0.889572	6.08418	0.0639583	0.474728
gene_3155	-0.577548	5.58175	0.0639839	0.474728
gene_6735	-0.8102	5.51665	0.0639911	0.474728
gene_3956	-0.765666	4.71058	0.0641097	0.474728
gene_4286	-1.27539	3.59983	0.0641621	0.474728
gene_7776	-1.92469	-0.0759923	0.0643524	0.474728
gene_7360	0.619061	3.06281	0.0644382	0.474728
gene_5843	-0.675782	3.70418	0.0644681	0.474728
gene_747	-0.839541	5.82771	0.0645328	0.474728
gene_4172	-0.627457	4.66801	0.0645406	0.474728
gene_5409	-0.594124	6.74092	0.0646074	0.474728
gene_2008	0.399687	6.63564	0.0646455	0.474728
gene_5026	-0.934874	9.82038	0.064752	0.474728
gene_3640	0.652805	6.99637	0.064824	0.474728
gene_539	0.683172	3.99071	0.0648244	0.474728
gene_2835	-0.677801	9.95467	0.0648709	0.474728
gene_1436	-0.678411	5.47938	0.0649146	0.474728
gene_6161	0.663438	6.3591	0.065046	0.474728
gene_5287	-0.664956	5.94367	0.0651519	0.474728
gene_7485	-1.27033	2.07042	0.0652175	0.474728
gene_1805	-0.414474	6.38032	0.0653468	0.474728
gene_7355	0.375124	8.55641	0.0655864	0.474728
gene_1667	-1.45398	-0.0403479	0.0656312	0.474728
gene_2353	-0.733592	5.01643	0.0656954	0.474728
gene_815	0.923061	5.75246	0.0657029	0.474728
gene_5580	0.604458	5.58057	0.0657337	0.474728
gene_5420	-1.04512	9.87764	0.0657679	0.474728
gene_2785	-0.838661	7.91869	0.0658425	0.474728
gene_738	0.700677	4.35218	0.0658514	0.474728
gene_7885	0.492566	7.06493	0.0658556	0.474728
gene_6614	-1.49837	1.4108	0.0659058	0.474728
gene_8349	-1.41976	3.08253	0.0659133	0.474728
gene_1910	-0.494648	6.8835	0.0659135	0.474728
gene_7469	0.346883	5.85698	0.0659707	0.474728
gene_3571	-2.05596	1.68872	0.0660977	0.474728
gene_2278	-0.707993	3.7141	0.0661071	0.474728
gene_6758	0.67142	4.30302	0.066162	0.474728
gene_4527	1.17958	4.57395	0.0662096	0.474728
gene_1904	-0.950512	4.42773	0.0662724	0.474728
gene_1195	-0.932892	9.83825	0.0663154	0.474728
gene_595	-1.83083	-0.410388	0.0663363	0.474728
gene_4938	-0.983063	5.43986	0.0663804	0.474728
gene_3957	-0.647393	9.94647	0.0663848	0.474728
gene_7294	-0.787244	7.16377	0.0664396	0.474728
gene_8204	-0.347292	6.20569	0.0665163	0.474728
gene_1240	-1.16858	5.51041	0.0666157	0.474728
gene_6338	1.00821	2.09342	0.0666219	0.474728
gene_614	-0.833257	3.25333	0.0666223	0.474728
gene_6709	-0.462092	7.09733	0.0666725	0.474728
gene_6025	1.41191	-0.104505	0.0666859	0.474728
gene_408	0.523773	5.34095	0.0667277	0.474728
gene_298	0.965349	9.28976	0.0667633	0.474728
gene_1686	-0.794514	4.22301	0.0668355	0.474825
gene_1163	0.484633	11.3983	0.0669056	0.474906
gene_1597	-0.402658	7.03627	0.0670342	0.475293
gene_279	0.94513	8.11524	0.0670774	0.475293
gene_7972	-0.995937	2.8333	0.067168	0.475506
gene_642	-0.50938	5.64172	0.0673286	0.475506
gene_6588	-0.396181	5.10001	0.0674316	0.475506
gene_7212	0.825281	4.46232	0.0674917	0.475506
gene_7956	1.43974	4.87118	0.067551	0.475506
gene_216	1.35523	5.10404	0.0675626	0.475506
gene_4163	-0.459133	6.92038	0.0675984	0.475506
gene_883	1.07371	2.34695	0.0675993	0.475506
gene_976	-0.515235	5.47316	0.0676358	0.475506
gene_5180	-0.743109	4.18163	0.0677542	0.475925
gene_7873	-0.756861	4.16678	0.0678262	0.476018
gene_6387	-0.522892	4.77393	0.0680062	0.476671
gene_8347	-0.545457	5.83252	0.0680369	0.476671
gene_6098	0.822154	2.38948	0.0683156	0.477291
gene_1503	0.484342	5.44987	0.0683204	0.477291
gene_3968	0.330109	6.8529	0.0683576	0.477291
gene_4991	0.40582	6.65482	0.068391	0.477291
gene_3313	-0.979516	4.24703	0.0685005	0.477291
gene_2996	-1.07565	10.7253	0.0685131	0.477291
gene_2356	-0.753564	4.96753	0.0685381	0.477291
gene_7759	-0.618978	6.8418	0.0686619	0.477712
gene_4300	0.571792	6.49185	0.0687807	0.477712
gene_6757	0.498853	4.487	0.0688742	0.477712
gene_5640	1.8012	0.395677	0.0690276	0.477712
gene_4956	-0.422766	6.46454	0.0690729	0.477712
gene_2072	-0.854835	8.14021	0.0691056	0.477712
gene_1057	0.508636	6.92769	0.0691197	0.477712
gene_4843	-0.558701	5.77463	0.0691511	0.477712
gene_5147	0.520163	8.18321	0.0691531	0.477712
gene_7259	-0.489122	6.74628	0.0691883	0.477712
gene_5005	0.571344	6.9663	0.0693794	0.477913
gene_5404	0.379467	5.84235	0.0694426	0.477913
gene_1271	1.45475	7.71307	0.0694448	0.477913
gene_1157	-1.45689	0.851897	0.0695105	0.477913
gene_5421	-0.537716	4.77993	0.0696182	0.477913
gene_7559	0.377012	6.32152	0.0696822	0.477913
gene_5138	-0.934021	7.42482	0.0697581	0.477913
gene_4615	-1.03964	3.45312	0.0697934	0.477913
gene_1939	-1.8569	0.732898	0.0698753	0.477913
gene_8676	-0.421283	6.17274	0.0699662	0.477913
gene_4833	1.48958	5.53595	0.0700725	0.477913
gene_1327	-0.669513	5.69612	0.0700794	0.477913
gene_1283	-0.79534	4.06747	0.0702977	0.477913
gene_5383	-1.52989	1.78832	0.070317	0.477913
gene_3137	-0.601445	7.17559	0.0703268	0.477913
gene_2745	-0.382561	5.53096	0.0703281	0.477913
gene_1706	0.383287	6.44241	0.0703289	0.477913
gene_364	0.430324	6.17416	0.0703722	0.477913
gene_6093	0.878006	6.78002	0.0704893	0.477913
gene_3431	0.912364	5.88374	0.0704955	0.477913
gene_5472	-0.621624	6.40023	0.0706033	0.477913
gene_2883	0.617582	5.04639	0.0707631	0.477913
gene_7281	0.945734	3.85953	0.0708155	0.477913
gene_8623	1.44334	0.685538	0.0709033	0.477913
gene_478	-1.31597	5.95177	0.070983	0.477913
gene_5051	-0.892549	3.95557	0.0710132	0.477913
gene_4817	-0.601081	3.68117	0.0710217	0.477913
gene_7546	-1.17955	2.09844	0.0710728	0.477913
gene_8782	1.20185	2.24223	0.0711658	0.477913
gene_4626	0.686985	4.0184	0.0712164	0.477913
gene_4087	0.788228	5.5981	0.0712743	0.477913
gene_2173	-1.2917	2.81836	0.0713144	0.477913
gene_5695	-0.993139	4.39463	0.0713474	0.477913
gene_6746	-0.444189	6.32108	0.071368	0.477913
gene_5264	-0.666029	4.99957	0.0713724	0.477913
gene_8553	-1.32546	2.05536	0.0714258	0.477913
gene_2302	0.504639	6.00296	0.071459	0.477913
gene_5265	-0.521672	6.85822	0.0714597	0.477913
gene_7439	-0.603069	6.23783	0.0716257	0.478627
gene_4239	-0.537309	8.70238	0.0717286	0.47892
gene_8320	0.707075	4.7358	0.0718537	0.47936
gene_6279	0.586019	4.29466	0.0719502	0.479608
gene_6087	-0.928922	5.0816	0.072459	0.482603
gene_4598	-1.22457	3.08786	0.0726302	0.483321
gene_504	-0.948453	8.80146	0.0727412	0.483321
gene_3602	0.429981	5.91007	0.0727922	0.483321
gene_3447	-1.46748	1.86393	0.0728935	0.483321
gene_5611	-0.468868	11.7032	0.0729154	0.483321
gene_4204	-0.621924	4.36824	0.0729609	0.483321
gene_7234	-0.743908	5.21698	0.0729944	0.483321
gene_3245	0.697388	6.63403	0.0730823	0.483321
gene_7146	-1.08482	3.02521	0.0731778	0.483321
gene_1785	0.963071	2.45198	0.073347	0.483321
gene_5707	-0.551372	7.46101	0.0733649	0.483321
gene_8462	1.11706	2.29394	0.073367	0.483321
gene_7298	-0.837367	10.1161	0.0734161	0.483321
gene_7696	0.356373	5.8154	0.073541	0.483321
gene_3047	0.534772	8.04667	0.0736238	0.483321
gene_6418	1.26187	6.0357	0.0736535	0.483321
gene_8551	0.745868	7.22174	0.0737109	0.483321
gene_4004	-1.68099	0.998389	0.0737164	0.483321
gene_4349	1.28549	4.19188	0.0737895	0.483321
gene_5590	-0.679979	4.49389	0.073818	0.483321
gene_1616	-0.491434	6.45721	0.0738624	0.483321
gene_3166	-1.15804	1.27986	0.0738797	0.483321
gene_3755	0.490422	3.77288	0.0742296	0.483946
gene_5186	-1.37885	1.15973	0.0742401	0.483946
gene_5447	-0.972689	2.60914	0.0742406	0.483946
gene_5158	-0.541001	5.73346	0.0742693	0.483946
gene_5196	-0.44103	6.03421	0.0742739	0.483946
gene_605	-0.853555	5.80597	0.0745406	0.485231
gene_912	-0.820902	10.2744	0.0747419	0.485231
gene_7378	0.456391	5.36971	0.074819	0.485231
gene_3039	1.00952	3.1285	0.0750644	0.485231
gene_3998	-0.406878	5.57629	0.0751219	0.485231
gene_4219	-0.927473	9.46337	0.0751231	0.485231
gene_4829	-0.927801	2.37994	0.0751375	0.485231
gene_6656	-1.67528	0.519169	0.0751669	0.485231
gene_7828	0.878706	4.84733	0.075167	0.485231
gene_5560	-0.493705	5.97328	0.0751742	0.485231
gene_1497	0.610578	4.24771	0.0752602	0.485231
gene_524	-0.609242	5.40642	0.0752783	0.485231
gene_938	-0.6217	6.12005	0.0754705	0.485231
gene_2755	0.552991	4.97923	0.0754836	0.485231
gene_7907	0.662491	8.70452	0.0755365	0.485231
gene_8506	0.653895	6.74343	0.0755805	0.485231
gene_3172	-0.708236	11.3963	0.0755822	0.485231
gene_677	-0.404172	6.94178	0.0755975	0.485231
gene_861	-1.5047	0.515457	0.075637	0.485231
gene_2829	0.81676	5.67659	0.0758063	0.485231
gene_5001	-1.03853	3.69635	0.0758178	0.485231
gene_7257	0.443565	9.10591	0.0758303	0.485231
gene_7836	-1.01149	2.12193	0.0758556	0.485231
gene_1938	-1.1172	5.04152	0.0759092	0.485231
gene_6347	-0.761899	4.47233	0.0761668	0.486158
gene_7760	-1.08126	1.96294	0.0762834	0.486158
gene_306	-0.917786	7.15019	0.0763093	0.486158
gene_7876	-1.02744	4.56782	0.0763682	0.486158
gene_3826	0.415781	6.7144	0.0765257	0.486158
gene_6800	0.65518	8.24214	0.0765646	0.486158
gene_3237	0.40832	7.72478	0.0766154	0.486158
gene_8861	0.475348	4.75848	0.0766939	0.486158
gene_3032	-1.0611	8.91639	0.0767088	0.486158
gene_3944	0.335484	8.72662	0.0767396	0.486158
gene_7703	-0.549784	4.83941	0.0768018	0.486158
gene_1350	-0.88293	5.01354	0.0768353	0.486158
gene_5743	0.646013	4.8955	0.0768484	0.486158
gene_7433	-0.528273	6.43963	0.0769148	0.486158
gene_2135	1.04292	5.35291	0.0769545	0.486158
gene_3420	0.483155	5.64613	0.0770398	0.486274
gene_3336	0.754183	5.79244	0.0770929	0.486274
gene_4895	0.808762	3.64386	0.0771543	0.486282
gene_1673	1.27162	1.3499	0.0772726	0.486649
gene_919	1.02116	2.88624	0.0773331	0.486652
gene_5571	-0.616787	4.42621	0.0774558	0.48667
gene_3788	-0.601178	4.78712	0.0774561	0.48667
gene_8247	-0.513585	6.85673	0.0775902	0.48673
gene_8387	0.536997	4.83012	0.0777892	0.48673
gene_3359	-1.12607	2.61307	0.077848	0.48673
gene_3385	0.510623	6.2601	0.0779008	0.48673
gene_1196	-0.882244	5.74613	0.0779311	0.48673
gene_467	0.510483	6.1336	0.0780103	0.48673
gene_1269	0.911405	5.06041	0.0781061	0.48673
gene_2721	-0.600235	3.7871	0.0781509	0.48673
gene_3316	-0.631564	7.35633	0.0782593	0.48673
gene_2763	1.58448	1.67606	0.0782626	0.48673
gene_597	-0.777998	4.90489	0.0782874	0.48673
gene_4382	0.713565	8.14595	0.0783363	0.48673
gene_7362	-0.872598	3.30263	0.0783573	0.48673
gene_8517	0.493742	5.28792	0.0783843	0.48673
gene_8439	-1.46363	-0.335134	0.0784551	0.48673
gene_1972	1.14583	4.09024	0.0785147	0.48673
gene_7825	-0.625042	5.48845	0.0787128	0.48673
gene_354	-0.892651	3.16424	0.0787301	0.48673
gene_3987	0.334905	6.80231	0.0787376	0.48673
gene_7693	-0.760434	5.35834	0.0788149	0.48673
gene_1685	-0.846068	5.75673	0.0788313	0.48673
gene_5868	0.603333	4.54722	0.0789114	0.48673
gene_3096	-0.682575	5.05879	0.0789551	0.48673
gene_3204	0.618345	4.46529	0.0790493	0.48673
gene_1617	0.470289	5.54561	0.0791121	0.48673
gene_1129	0.444611	6.5652	0.0791204	0.48673
gene_7735	0.470589	7.36037	0.0791827	0.48673
gene_4039	-1.03407	8.96528	0.0793365	0.48673
gene_6402	-0.935053	3.58278	0.0794268	0.48673
gene_4774	-1.29422	8.81415	0.0795315	0.48673
gene_2553	0.558692	7.00307	0.0795888	0.48673
gene_8607	-1.06825	2.53682	0.0796359	0.48673
gene_8842	1.53963	-0.301596	0.079867	0.48673
gene_4980	0.347101	7.18736	0.0798992	0.48673
gene_261	1.16516	2.67752	0.0799786	0.48673
gene_7477	-1.91228	-0.0716689	0.079992	0.48673
gene_6233	-0.759414	4.19992	0.0800408	0.48673
gene_6307	0.523611	4.96152	0.0800651	0.48673
gene_7129	0.699915	6.01316	0.0800687	0.48673
gene_3674	-1.54254	-0.187741	0.0800988	0.48673
gene_8361	0.531209	4.41304	0.0801018	0.48673
gene_7116	1.56788	-0.47316	0.0801303	0.48673
gene_7175	-0.434951	6.64105	0.0801916	0.48673
gene_2629	-0.618627	6.04629	0.0805666	0.48673
gene_6948	-0.938325	9.44354	0.0806057	0.48673
gene_4877	0.353205	7.97381	0.0806141	0.48673
gene_2558	0.581891	7.39001	0.0806179	0.48673
gene_5232	-0.587579	6.58465	0.080675	0.48673
gene_1177	-0.644347	4.70346	0.080684	0.48673
gene_2323	0.419717	7.52128	0.0807184	0.48673
gene_6657	-0.434936	5.10706	0.0807259	0.48673
gene_4298	-0.817299	6.01652	0.0807564	0.48673
gene_2786	-1.42269	0.830966	0.0807993	0.48673
gene_6997	-0.632125	5.46375	0.0808723	0.48673
gene_8425	0.371606	5.69024	0.0808757	0.48673
gene_2082	0.421242	6.47572	0.0808838	0.48673
gene_1101	-0.511797	5.58947	0.0809067	0.48673
gene_2191	1.74334	0.539635	0.0809627	0.48673
gene_4038	-1.1207	9.18957	0.0810127	0.48673
gene_393	0.941332	4.24366	0.0810716	0.48673
gene_5710	0.511817	7.35058	0.081316	0.487626
gene_4016	0.475727	5.69322	0.0813955	0.487626
gene_2692	0.425986	5.70307	0.0814015	0.487626
gene_1964	-0.880349	3.9268	0.0816076	0.487859
gene_228	1.29586	5.50886	0.0816845	0.487859
gene_6645	-1.8962	2.51444	0.081686	0.487859
gene_6158	0.875777	8.47479	0.0817507	0.487859
gene_1053	-0.876652	3.9997	0.0818508	0.487859
gene_516	0.408212	5.57363	0.0819072	0.487859
gene_5050	-0.92262	8.78089	0.081921	0.487859
gene_1908	-0.738139	5.68274	0.0819431	0.487859
gene_4698	-0.451971	5.07292	0.0819904	0.487859
gene_7791	-0.381791	7.31227	0.0820427	0.487859
gene_5315	-0.502636	5.71626	0.0822353	0.488211
gene_4665	-0.466572	5.77496	0.0822735	0.488211
gene_8793	2.16389	2.9339	0.0823431	0.488211
gene_4611	-0.502675	5.94456	0.0824337	0.488211
gene_58	1.05191	7.76079	0.0824591	0.488211
gene_3169	0.678285	10.535	0.0824635	0.488211
gene_1207	1.24427	2.00713	0.0825785	0.488534
gene_8754	-1.01504	9.5942	0.0826504	0.488585
gene_7025	-0.94482	8.93399	0.0827078	0.488585
gene_8693	0.427127	7.54365	0.0829894	0.489394
gene_2161	0.838058	6.50298	0.0830758	0.489394
gene_2611	0.566812	6.42626	0.0830992	0.489394
gene_1448	0.845098	7.22646	0.0831841	0.489394
gene_235	-0.815618	3.47656	0.0833778	0.489394
gene_1848	0.583335	8.62777	0.0834503	0.489394
gene_3614	0.411653	5.63988	0.0834649	0.489394
gene_8484	0.467895	6.35988	0.0834839	0.489394
gene_5221	-0.522591	4.57988	0.0835238	0.489394
gene_2901	1.17485	4.79687	0.0835257	0.489394
gene_3517	1.23116	5.0453	0.0835459	0.489394
gene_6596	0.711476	3.99485	0.0835698	0.489394
gene_4291	0.670577	6.40716	0.0836822	0.489573
gene_7566	-0.720978	8.25138	0.0837468	0.489573
gene_926	1.51542	1.26752	0.0837818	0.489573
gene_5845	0.489	6.99617	0.0839975	0.49048
gene_1422	-0.550586	6.18744	0.0842823	0.491331
gene_2403	0.935486	5.27642	0.084342	0.491331
gene_6989	-1.102	1.81599	0.0844882	0.491331
gene_7055	0.54981	6.60184	0.0845818	0.491331
gene_2330	-1.50712	4.43463	0.0846514	0.491331
gene_180	1.35953	5.78504	0.0846562	0.491331
gene_705	1.5856	1.98738	0.0847137	0.491331
gene_425	0.67694	3.29808	0.084741	0.491331
gene_629	0.322796	6.4877	0.0847558	0.491331
gene_4562	0.511613	7.21655	0.0849133	0.491331
gene_4181	-0.990351	4.59401	0.0849788	0.491331
gene_2915	-0.650958	5.48435	0.084996	0.491331
gene_2281	1.79426	-0.107037	0.0850202	0.491331
gene_8154	-0.997337	9.15197	0.0850203	0.491331
gene_5972	0.440511	5.85605	0.0851058	0.491331
gene_510	-1.73601	1.1209	0.0851139	0.491331
gene_4035	-1.43092	0.891207	0.0851867	0.491401
gene_7325	-0.732227	8.32115	0.0853251	0.491588
gene_2038	-0.569716	5.42639	0.0854518	0.491588
gene_4926	0.52242	5.91525	0.0855206	0.491588
gene_5121	0.565656	4.52645	0.0855344	0.491588
gene_3089	-0.345292	8.5068	0.0855928	0.491588
gene_3277	-0.554258	5.68817	0.0856909	0.491588
gene_2077	0.604285	6.06301	0.0857061	0.491588
gene_2240	-1.01303	3.75228	0.0857516	0.491588
gene_6659	-0.810405	2.59638	0.0858661	0.491588
gene_347	-1.43847	1.79795	0.0858893	0.491588
gene_7387	-1.51595	1.31826	0.0859554	0.491588
gene_7667	1.35013	10.3149	0.0859961	0.491588
gene_323	-0.844371	7.92954	0.0861021	0.491588
gene_8333	-0.656479	3.89299	0.0861176	0.491588
gene_2815	0.377746	6.77992	0.0861296	0.491588
gene_7098	-1.89525	1.89472	0.0863135	0.491855
gene_8500	-1.47935	1.9992	0.0863478	0.491855
gene_5277	-0.884835	3.53333	0.0864216	0.491855
gene_1988	1.83197	4.67525	0.0865577	0.491855
gene_1536	-0.599304	4.64347	0.0866194	0.491855
gene_4553	-0.862376	4.03439	0.0866275	0.491855
gene_818	0.873471	5.89828	0.0866526	0.491855
gene_1669	-1.39199	3.66814	0.0866825	0.491855
gene_6127	-0.694462	5.03314	0.0868288	0.491855
gene_1506	0.815447	5.36258	0.0868396	0.491855
gene_7218	0.499069	5.79088	0.0870068	0.491855
gene_263	0.663775	4.5166	0.0870475	0.491855
gene_7115	0.639403	5.54628	0.0871731	0.491855
gene_5342	0.405709	5.29647	0.087189	0.491855
gene_8388	0.556786	7.11972	0.0872173	0.491855
gene_8088	0.820219	5.97916	0.08723	0.491855
gene_7954	-0.79511	2.90135	0.0875417	0.491855
gene_3183	0.510093	6.56022	0.087576	0.491855
gene_3687	1.01956	3.13602	0.0876019	0.491855
gene_8253	0.633907	6.6808	0.0876419	0.491855
gene_7285	0.707905	5.58563	0.0876725	0.491855
gene_5475	-0.466807	4.44284	0.0877123	0.491855
gene_5023	-0.638322	4.17877	0.0877261	0.491855
gene_5269	-0.58851	5.02334	0.0877588	0.491855
gene_3639	0.431896	6.47096	0.0877622	0.491855
gene_644	0.5446	12.4684	0.0877938	0.491855
gene_8097	-0.952963	2.22763	0.087816	0.491855
gene_5321	-0.595445	5.34845	0.0879032	0.492003
gene_3178	1.70875	1.15513	0.0880278	0.492208
gene_2454	-1.09488	8.54128	0.0880615	0.492208
gene_85	1.13166	3.62283	0.0881301	0.492252
gene_6	0.37013	6.88334	0.0882685	0.492686
gene_1455	1.15941	1.61919	0.0885847	0.493866
gene_6667	-0.671964	3.40626	0.0887596	0.493866
gene_8382	0.458722	9.01669	0.0890214	0.493866
gene_5215	-0.90646	2.98235	0.0890392	0.493866
gene_5682	0.492117	4.65564	0.0891565	0.493866
gene_758	0.40332	7.39116	0.0892149	0.493866
gene_7812	0.435375	7.32914	0.0892239	0.493866
gene_182	-1.28082	5.67285	0.0892394	0.493866
gene_8102	0.872329	7.32657	0.0892493	0.493866
gene_3205	0.560423	7.97732	0.0892549	0.493866
gene_7363	-0.504119	8.86275	0.0892602	0.493866
gene_5539	0.962988	6.96429	0.0892686	0.493866
gene_6950	-0.386186	7.369	0.0892728	0.493866
gene_604	1.21803	4.54067	0.08942	0.494343
gene_3190	-0.806727	9.41381	0.089614	0.495078
gene_7039	-1.28756	0.932461	0.0897739	0.49544
gene_537	0.670631	6.28925	0.0898019	0.49544
gene_6910	0.502747	9.88293	0.0902668	0.49672
gene_4609	0.513096	5.69882	0.0902924	0.49672
gene_2226	1.05917	2.65123	0.090303	0.49672
gene_238	0.417999	6.18262	0.0903146	0.49672
gene_3452	-1.2022	5.73517	0.0904728	0.49672
gene_1119	-0.508439	5.60025	0.0905595	0.49672
gene_3870	-0.98057	4.84077	0.0905847	0.49672
gene_5437	0.427117	6.14121	0.0906165	0.49672
gene_4495	-1.13618	1.48329	0.0906344	0.49672
gene_3449	0.484143	9.07869	0.0907518	0.49672
gene_4357	-0.577449	5.84242	0.0907537	0.49672
gene_6711	-1.37819	0.451781	0.090804	0.49672
gene_8823	-0.703321	5.21248	0.0908313	0.49672
gene_752	0.489581	6.35803	0.0909864	0.496936
gene_288	-0.453987	5.47238	0.0911057	0.496936
gene_7375	-0.686541	4.71027	0.0911127	0.496936
gene_7588	-0.343752	5.13208	0.0911163	0.496936
gene_5090	0.613378	3.81805	0.0911999	0.497058
gene_7708	-0.481857	5.09047	0.0913765	0.497524
gene_1626	0.469407	6.1772	0.0914756	0.497524
gene_2089	-0.761501	3.06576	0.0914829	0.497524
gene_7221	-0.569446	5.58243	0.0915479	0.497524
gene_3323	-0.592039	4.56246	0.0916809	0.497524
gene_2274	0.407305	5.09503	0.0917352	0.497524
gene_7607	-0.66773	4.92157	0.0917791	0.497524
gene_2259	0.747684	5.34584	0.0918307	0.497524
gene_3092	-0.548995	6.08899	0.091856	0.497524
gene_1664	-0.545886	5.59748	0.0918997	0.497524
gene_7026	0.609148	6.52607	0.0920236	0.497655
gene_2577	-0.786369	3.91011	0.09211	0.497655
gene_3053	0.403193	5.92003	0.0921744	0.497655
gene_6449	-0.994902	5.48734	0.0922352	0.497655
gene_1071	-0.919537	4.39895	0.0922827	0.497655
gene_5520	0.483951	7.56216	0.0922926	0.497655
gene_911	-0.856366	3.39212	0.092526	0.498414
gene_8156	0.660147	5.34426	0.0925564	0.498414
gene_1758	-0.82128	4.41947	0.092675	0.498434
gene_6084	0.323043	6.65911	0.0926832	0.498434
gene_652	0.511762	5.44542	0.0927745	0.498469
gene_6424	-0.885913	3.74152	0.0929259	0.498469
gene_4022	-0.857417	8.44649	0.0929515	0.498469
gene_7057	0.331301	8.55977	0.0929588	0.498469
gene_4465	0.411329	5.71245	0.0929974	0.498469
gene_8831	0.77912	3.97586	0.093163	0.499026
gene_54	-0.629747	5.17713	0.0934229	0.499823
gene_1678	-0.880606	3.26208	0.0934352	0.499823
gene_3378	-0.641802	3.7374	0.0934993	0.499836
gene_5048	0.957008	2.59627	0.0936045	0.500068
gene_2947	0.479282	5.63449	0.0937639	0.500589
gene_2074	0.520467	6.33555	0.0940039	0.500916
gene_7814	-0.754009	4.80631	0.0940344	0.500916
gene_3917	1.28211	5.44362	0.0941282	0.500916
gene_2504	0.661318	5.8515	0.0941659	0.500916
gene_6771	1.14523	7.24759	0.0941992	0.500916
gene_662	0.573722	6.19508	0.0942841	0.500916
gene_1115	-0.644784	4.15873	0.0942847	0.500916
gene_5235	-1.05554	2.20535	0.0943198	0.500916
gene_8683	0.584293	11.6388	0.0946012	0.50208
gene_6763	-0.372338	8.41065	0.094758	0.502538
gene_1720	-0.40124	7.14662	0.0948115	0.502538
gene_4397	1.81927	-0.611186	0.0949525	0.502956
gene_4514	0.660119	5.25844	0.095034	0.503
gene_3211	-0.393402	5.82386	0.0951423	0.503
gene_2217	-1.21565	2.89333	0.0951725	0.503
gene_348	0.566722	4.83858	0.0954444	0.503
gene_5059	0.383612	5.1446	0.0954531	0.503
gene_683	0.815217	5.39424	0.0954783	0.503
gene_2223	-0.637271	10.6173	0.0955461	0.503
gene_3098	-0.904309	9.41252	0.0955872	0.503
gene_3597	-0.412719	6.22271	0.0955914	0.503
gene_2041	-0.639619	6.72651	0.0956233	0.503
gene_2419	-0.694995	7.09419	0.095679	0.503
gene_4684	0.470887	7.60497	0.0957813	0.503
gene_8815	0.440964	7.9695	0.0958276	0.503
gene_7780	-1.00076	2.77469	0.0959671	0.503
gene_2519	-0.950917	9.34173	0.096036	0.503
gene_3157	0.538819	4.3982	0.0960678	0.503
gene_4143	0.385416	8.16805	0.0961169	0.503
gene_126	0.435312	5.31485	0.0961558	0.503
gene_3195	0.426624	5.51312	0.0962134	0.503
gene_1111	-0.417196	6.24637	0.0962888	0.503
gene_7593	-0.660796	4.2909	0.0963428	0.503
gene_5907	0.647381	4.17844	0.0963909	0.503
gene_8376	-0.50734	5.33867	0.0965375	0.503
gene_828	-1.39118	1.4934	0.096554	0.503
gene_4756	0.454939	7.33805	0.0965879	0.503
gene_1035	-0.6571	4.83889	0.096647	0.503
gene_2871	-0.87973	9.25492	0.0966964	0.503
gene_7933	0.714353	2.21819	0.0967372	0.503
gene_378	0.434739	6.18756	0.0967757	0.503
gene_2886	-1.64992	1.89118	0.0968238	0.503
gene_6151	1.10522	3.6956	0.0969246	0.5032
gene_500	0.606894	3.71035	0.0972059	0.503434
gene_690	0.379107	7.16331	0.0972525	0.503434
gene_6535	-0.849434	6.50985	0.0972636	0.503434
gene_6180	-1.33077	4.03235	0.0973167	0.503434
gene_4443	0.465857	4.67704	0.0973512	0.503434
gene_1701	-0.774479	5.38584	0.0974265	0.503434
gene_7428	0.998667	1.34757	0.0974289	0.503434
gene_6625	0.309779	7.39122	0.0975095	0.503434
gene_6202	0.700345	4.84044	0.0975321	0.503434
gene_5295	0.604625	4.30019	0.0976499	0.503434
gene_7601	-0.480013	7.68941	0.0976534	0.503434
gene_6938	-1.2037	1.26726	0.0978884	0.503596
gene_233	-0.473715	6.78306	0.0979024	0.503596
gene_8630	-0.425965	4.70209	0.0979239	0.503596
gene_7528	1.99525	1.86316	0.0979751	0.503596
gene_1762	-0.869584	9.33372	0.0979957	0.503596
gene_6125	0.633552	4.39255	0.098142	0.504028
gene_3337	0.784091	5.59906	0.0982787	0.504342
gene_3513	0.458002	8.47956	0.0983277	0.504342
gene_6849	0.903341	2.61218	0.098601	0.504535
gene_8469	-0.32935	7.25558	0.0986538	0.504535
gene_3118	-0.390211	4.88956	0.0987008	0.504535
gene_3903	0.419447	7.15024	0.0988118	0.504535
gene_7567	-0.752261	10.0416	0.0988325	0.504535
gene_4744	1.26504	3.65259	0.0989819	0.504535
gene_1744	-0.60909	6.38	0.0991425	0.504535
gene_4692	0.485761	6.33427	0.0992708	0.504535
gene_5599	0.877424	3.87456	0.0993617	0.504535
gene_1863	0.989054	4.02933	0.0994758	0.504535
gene_2514	-0.727138	4.42893	0.0994771	0.504535
gene_3462	1.57113	-0.310174	0.0995108	0.504535
gene_6879	-0.492899	6.36344	0.0995944	0.504535
gene_5875	-1.76563	-0.489929	0.0996032	0.504535
gene_8282	0.673084	3.74734	0.0996175	0.504535
gene_6405	-0.416171	4.97328	0.0996299	0.504535
gene_7245	-1.81836	0.899446	0.0997162	0.504535
gene_3015	-1.35419	1.82425	0.0997359	0.504535
gene_3991	-0.652628	6.1547	0.0998404	0.504535
gene_7003	0.38721	6.31703	0.0998629	0.504535
gene_6360	0.69164	4.46295	0.0998645	0.504535
gene_8346	2.2326	3.65159	0.0998688	0.504535
gene_7532	0.67626	4.45433	0.100028	0.504535
gene_3925	-0.886359	2.10912	0.10004	0.504535
gene_2500	0.387015	7.81792	0.100215	0.504535
gene_7575	-0.7813	5.02877	0.100261	0.504535
gene_3739	0.957596	6.44941	0.100364	0.504535
gene_4390	0.606579	5.67708	0.100425	0.504535
gene_5855	-0.561785	4.1837	0.100601	0.504535
gene_2	0.756356	3.42503	0.100625	0.504535
gene_7921	0.458495	7.32323	0.100635	0.504535
gene_8844	0.842381	4.06321	0.100713	0.504535
gene_2337	0.384276	7.41343	0.100728	0.504535
gene_7777	0.433792	5.24482	0.100741	0.504535
gene_4661	0.523507	7.38865	0.100765	0.504535
gene_6152	0.577618	5.55841	0.100792	0.504535
gene_7520	-0.837119	3.75935	0.100819	0.504535
gene_2510	0.834472	2.49541	0.100831	0.504535
gene_7874	-1.61079	-0.424029	0.100957	0.504535
gene_3007	-0.974195	2.77329	0.10096	0.504535
gene_1528	1.8099	0.361623	0.100994	0.504535
gene_1699	1.83278	1.36301	0.101028	0.504535
gene_622	-0.783546	9.22532	0.101044	0.504535
gene_6649	-0.553891	4.40243	0.101172	0.504797
gene_3379	-0.513669	9.89591	0.101221	0.504797
gene_4045	0.814627	3.39537	0.101379	0.50489
gene_4689	-0.342203	5.98074	0.101404	0.50489
gene_2684	-0.970023	5.58772	0.101427	0.50489
gene_4816	-0.870867	9.38954	0.101658	0.505731
gene_477	0.577078	6.03568	0.101795	0.505996
gene_2881	-0.479765	6.35018	0.101836	0.505996
gene_1427	-0.603833	4.14273	0.102024	0.506616
gene_4353	0.67756	3.7726	0.102176	0.507063
gene_3650	-0.637687	4.97155	0.102393	0.507656
gene_2129	0.73982	4.8518	0.102421	0.507656
gene_5632	0.378863	6.39283	0.102533	0.507824
gene_1174	-1.74133	-0.156168	0.102581	0.507824
gene_2097	0.839913	5.85578	0.102722	0.508214
gene_403	-1.64896	0.679879	0.102793	0.508222
gene_46	-0.845173	2.81266	0.102962	0.508222
gene_3883	-0.90962	9.85187	0.103007	0.508222
gene_7689	0.43209	7.80181	0.10307	0.508222
gene_6509	0.984769	1.42031	0.103103	0.508222
gene_6566	-0.430826	5.8715	0.10317	0.508222
gene_8603	0.53689	5.3781	0.103172	0.508222
gene_6210	-2.22992	5.28497	0.103231	0.508222
gene_3284	-0.392295	7.20091	0.103325	0.508222
gene_1270	0.864257	6.71394	0.103435	0.508222
gene_8631	-1.36078	1.32506	0.103469	0.508222
gene_6348	-0.416093	5.22739	0.10352	0.508222
gene_4161	-0.812527	3.56368	0.103615	0.508222
gene_2304	-0.730999	6.05182	0.103621	0.508222
gene_1461	-0.301093	5.91627	0.103665	0.508222
gene_2531	-0.888825	3.46916	0.103856	0.508466
gene_6972	-0.719512	4.28569	0.10389	0.508466
gene_906	-0.671168	9.87738	0.104002	0.508466
gene_7673	1.3296	0.62042	0.104064	0.508466
gene_312	-0.483472	5.80875	0.104239	0.508466
gene_6314	0.287311	7.24153	0.104253	0.508466
gene_817	1.00974	8.95783	0.104389	0.508466
gene_7676	-0.903149	3.01803	0.10439	0.508466
gene_1433	0.310862	6.99636	0.104414	0.508466
gene_794	-0.657545	3.53882	0.104437	0.508466
gene_6587	-0.462473	6.68604	0.104576	0.508466
gene_1588	-0.454797	6.69488	0.104615	0.508466
gene_93	-0.54167	4.14013	0.104644	0.508466
gene_4567	-0.783382	11.6458	0.104648	0.508466
gene_2552	-0.939092	4.45469	0.104822	0.508466
gene_5593	0.578452	5.01027	0.104854	0.508466
gene_782	-0.799397	4.15667	0.104918	0.508466
gene_2679	0.830995	6.78857	0.104927	0.508466
gene_6589	0.509532	5.15841	0.104975	0.508466
gene_6941	1.18987	1.05594	0.10503	0.508466
gene_4234	0.944582	3.3157	0.105055	0.508466
gene_5182	-0.570804	4.32826	0.105126	0.508466
gene_2907	-1.45755	2.8714	0.105159	0.508466
gene_2878	0.548187	4.31619	0.105223	0.508473
gene_69	0.506468	5.40583	0.105374	0.508899
gene_8180	-0.693345	4.93779	0.105492	0.508989
gene_4202	1.50623	6.82235	0.105518	0.508989
gene_4624	-0.592859	5.33864	0.105871	0.509819
gene_8018	0.41026	5.15851	0.105924	0.509819
gene_426	-1.18352	4.33793	0.105927	0.509819
gene_3367	-1.2075	4.04275	0.10598	0.509819
gene_7033	0.492465	12.0567	0.106071	0.509819
gene_8452	-0.593708	7.87028	0.106086	0.509819
gene_8685	-0.92309	1.54471	0.106192	0.509819
gene_5753	-1.8712	0.327518	0.106202	0.509819
gene_5324	-0.592619	6.35102	0.106418	0.509819
gene_5189	0.540197	4.23879	0.106436	0.509819
gene_2121	1.03927	3.58127	0.106441	0.509819
gene_557	0.886017	3.29185	0.106446	0.509819
gene_3667	-0.619542	7.35442	0.106624	0.510372
gene_175	0.559356	9.01216	0.106704	0.510454
gene_1731	0.389905	5.89276	0.106861	0.510819
gene_6534	-0.939738	2.52317	0.10695	0.510819
gene_7789	0.691408	6.33311	0.106972	0.510819
gene_902	-0.364522	6.598	0.107237	0.510819
gene_634	0.684169	9.68445	0.107317	0.510819
gene_6135	0.455982	5.21569	0.10733	0.510819
gene_6377	-0.348417	8.08948	0.107397	0.510819
gene_6281	0.445072	6.21759	0.107447	0.510819
gene_8841	0.708166	9.08162	0.10745	0.510819
gene_3173	0.815353	3.05655	0.107485	0.510819
gene_5163	-1.40049	1.30564	0.107639	0.510819
gene_3202	-0.47611	5.67576	0.107667	0.510819
gene_8574	-0.538473	7.54745	0.107715	0.510819
gene_4406	-0.897404	4.69824	0.107717	0.510819
gene_8315	-0.446432	6.78368	0.107727	0.510819
gene_7470	-0.568498	6.96445	0.107923	0.511452
gene_6543	-0.853865	9.61661	0.108012	0.511573
gene_8136	-0.762261	9.19001	0.10815	0.511803
gene_7265	-1.00158	4.89612	0.108187	0.511803
gene_147	-0.543399	4.48074	0.108257	0.511835
gene_3162	-0.486951	7.94736	0.108356	0.512003
gene_565	-1.33397	-0.416627	0.108432	0.512065
gene_4719	0.35412	5.84036	0.108758	0.512773
gene_3647	-0.90656	6.65719	0.108763	0.512773
gene_3855	-0.486655	3.87481	0.108811	0.512773
gene_552	-0.564731	4.16939	0.108844	0.512773
gene_7395	0.483273	6.19684	0.108899	0.512773
gene_5148	1.7853	0.492247	0.109016	0.51303
gene_2958	0.395431	5.91755	0.109119	0.513215
gene_29	0.41421	7.72929	0.10939	0.514192
gene_3972	-1.04444	2.7151	0.109528	0.514542
gene_1171	-0.517598	9.50927	0.109915	0.515904
gene_6642	-0.792351	4.22854	0.109966	0.515904
gene_2982	-0.55857	6.75909	0.110009	0.515904
gene_5171	0.675779	4.59188	0.11016	0.51631
gene_1743	-1.10481	3.32638	0.110251	0.516347
gene_410	-1.34108	0.324599	0.110295	0.516347
gene_4061	0.586886	5.93848	0.110439	0.516722
gene_2345	-0.861589	4.6012	0.110723	0.517584
gene_4082	-0.683482	4.82554	0.11081	0.517584
gene_7658	1.70685	-0.201504	0.110824	0.517584
gene_8026	1.53555	6.71325	0.110879	0.517584
gene_4268	0.335434	7.55839	0.110978	0.517616
gene_558	-0.6545	10.1885	0.111014	0.517616
gene_2144	-1.36003	1.56219	0.111257	0.517663
gene_8482	1.13087	4.4524	0.111453	0.517663
gene_6775	-1.13884	2.93634	0.11153	0.517663
gene_1998	-1.34251	0.513887	0.1116	0.517663
gene_438	-0.634715	4.57647	0.111609	0.517663
gene_1930	-0.521468	7.48719	0.11165	0.517663
gene_7430	-0.558647	3.23469	0.111676	0.517663
gene_8426	-0.723395	5.2857	0.111891	0.517663
gene_6431	0.406327	6.99095	0.111918	0.517663
gene_5412	-0.509178	6.86376	0.112037	0.517663
gene_4856	-0.297784	6.94303	0.112065	0.517663
gene_5528	0.469642	6.72929	0.112097	0.517663
gene_8103	0.618358	9.61076	0.112107	0.517663
gene_4456	0.377302	7.16621	0.112112	0.517663
gene_808	0.517862	7.92301	0.11214	0.517663
gene_2268	0.376901	4.78055	0.112292	0.517663
gene_8337	-1.47698	1.49947	0.112295	0.517663
gene_3261	0.326736	5.96463	0.112519	0.517663
gene_1222	-0.811935	5.66025	0.112523	0.517663
gene_1494	-0.48063	4.97798	0.112531	0.517663
gene_5145	0.643955	4.70098	0.112534	0.517663
gene_763	0.536959	5.29313	0.112614	0.517663
gene_196	1.29764	4.67561	0.112639	0.517663
gene_8468	0.745977	3.89153	0.112641	0.517663
gene_1638	-0.72592	4.54368	0.112679	0.517663
gene_3997	-0.426172	4.81342	0.112686	0.517663
gene_3037	-0.50778	5.36461	0.112847	0.518061
gene_2511	0.381301	8.92236	0.1129	0.518061
gene_4890	0.458175	7.82953	0.113035	0.518203
gene_4554	1.07723	2.2824	0.113117	0.518203
gene_3464	0.496346	5.0898	0.113361	0.518203
gene_5906	0.338812	8.01669	0.113381	0.518203
gene_5441	-1.17106	9.3323	0.113391	0.518203
gene_385	0.574908	4.69673	0.113433	0.518203
gene_5822	1.11597	2.26072	0.113441	0.518203
gene_1406	-0.575133	4.50769	0.113443	0.518203
gene_1845	-0.475869	4.50367	0.113553	0.518231
gene_3248	-0.897552	4.30494	0.113577	0.518231
gene_7321	0.346413	7.45481	0.113817	0.518923
gene_8411	0.333079	6.16239	0.113857	0.518923
gene_17	1.57113	-0.405431	0.113939	0.519004
gene_5985	0.393802	5.58974	0.114039	0.519169
gene_6617	0.507949	5.80372	0.114192	0.519573
gene_2513	0.406483	5.97255	0.114858	0.521736
gene_793	-1.74998	1.73781	0.114876	0.521736
gene_374	-0.481302	4.45884	0.114907	0.521736
gene_5779	0.471994	7.37452	0.114925	0.521736
gene_5153	-0.909872	9.25031	0.115089	0.521945
gene_7980	0.515821	6.18017	0.115135	0.521945
gene_5190	0.380562	7.80264	0.115164	0.521945
gene_4246	-0.664342	6.22623	0.115378	0.522056
gene_3403	0.656564	4.95397	0.11538	0.522056
gene_8362	-1.45132	1.02529	0.115383	0.522056
gene_254	-0.550951	5.48853	0.11551	0.522056
gene_2569	0.507559	7.87888	0.115635	0.522056
gene_8153	-0.274732	6.84944	0.115746	0.522056
gene_4702	0.341709	7.83011	0.115814	0.522056
gene_7482	0.403853	7.53534	0.115869	0.522056
gene_7750	-0.499523	4.54137	0.11596	0.522056
gene_8226	-0.365534	7.15264	0.116001	0.522056
gene_8459	-0.549071	4.79166	0.116031	0.522056
gene_6073	-0.727791	5.63053	0.116046	0.522056
gene_7452	1.06761	8.39229	0.116057	0.522056
gene_7752	-0.483456	4.99655	0.116091	0.522056
gene_95	0.813072	8.22359	0.116296	0.52232
gene_6409	-0.632816	6.91979	0.116308	0.52232
gene_247	-0.679743	5.09901	0.116366	0.52232
gene_1582	0.630567	4.74949	0.116408	0.52232
gene_3305	0.360537	6.37871	0.116545	0.522442
gene_8679	-1.21239	0.848437	0.116564	0.522442
gene_7574	0.692463	3.5893	0.116935	0.523732
gene_1752	-0.381766	5.96508	0.116981	0.523732
gene_6190	1.08071	0.932461	0.117063	0.523806
gene_165	-0.361487	5.92443	0.117239	0.524265
gene_2950	0.39648	6.0096	0.117295	0.524265
gene_4913	-0.753574	8.69125	0.117515	0.524897
gene_6229	-0.586907	4.21293	0.117566	0.524897
gene_8443	0.352145	7.26235	0.11774	0.525386
gene_3713	-0.388392	5.68977	0.117913	0.525458
gene_6048	-0.332968	7.83851	0.117969	0.525458
gene_7403	0.367634	10.204	0.11798	0.525458
gene_2242	1.05469	8.20797	0.118033	0.525458
gene_6350	-0.425152	4.99334	0.118161	0.525458
gene_6924	-0.886453	10.5747	0.118184	0.525458
gene_550	-0.912345	4.69512	0.11821	0.525458
gene_1764	-0.872013	6.2107	0.118332	0.525633
gene_8427	-0.534167	6.93366	0.118396	0.525633
gene_4760	-0.440214	8.25918	0.118444	0.525633
gene_197	1.23916	4.90414	0.118511	0.525643
gene_4942	0.535004	7.05052	0.118613	0.525804
gene_593	-0.441455	6.34706	0.118716	0.525972
gene_5601	0.692201	6.28725	0.118829	0.526156
gene_8137	-0.492112	7.01589	0.118934	0.526156
gene_508	0.595452	4.87865	0.118989	0.526156
gene_6086	0.306776	7.03596	0.119017	0.526156
gene_6605	0.435629	9.13347	0.119087	0.526179
gene_5310	1.04941	2.07756	0.119168	0.526249
gene_4044	0.881424	9.36835	0.119286	0.526483
gene_1650	-0.684444	8.97468	0.119419	0.526671
gene_6577	0.341154	5.97509	0.119462	0.526671
gene_5357	0.320636	5.82528	0.119581	0.526671
gene_1906	-0.582744	6.0843	0.119671	0.526671
gene_2009	0.464704	5.43627	0.119678	0.526671
gene_712	0.362318	5.25227	0.119719	0.526671
gene_1231	0.865	5.78831	0.119934	0.527081
gene_7176	-0.537653	3.93944	0.119942	0.527081
gene_888	-0.564331	5.69228	0.12017	0.527199
gene_4720	-0.470923	5.24672	0.120249	0.527199
gene_3808	0.722242	7.08869	0.120552	0.527199
gene_3238	0.478648	5.08499	0.120634	0.527199
gene_4191	-0.988678	1.99049	0.120704	0.527199
gene_6628	-0.554016	5.10487	0.120981	0.527199
gene_191	0.355629	5.66226	0.121012	0.527199
gene_8697	-0.437219	4.46452	0.121049	0.527199
gene_4752	-0.543538	4.49731	0.121079	0.527199
gene_6177	-0.948926	2.6123	0.121138	0.527199
gene_6811	-1.40414	1.19542	0.121196	0.527199
gene_3348	-0.808442	6.46514	0.121203	0.527199
gene_1189	-1.23442	-0.489929	0.121206	0.527199
gene_6085	-0.34882	7.05033	0.121297	0.527199
gene_4825	0.80814	14.194	0.121385	0.527199
gene_5854	0.622671	4.09663	0.121391	0.527199
gene_3731	-1.019	5.46661	0.121394	0.527199
gene_8290	0.720738	3.75478	0.121536	0.527199
gene_2374	-0.576919	3.73008	0.121547	0.527199
gene_1548	1.12102	1.64994	0.121637	0.527199
gene_8606	0.530674	4.72411	0.121645	0.527199
gene_2402	1.62337	0.221994	0.121741	0.527199
gene_5537	0.498633	8.53108	0.121763	0.527199
gene_6137	-0.435905	5.88379	0.121774	0.527199
gene_163	-0.997377	9.21668	0.121869	0.527199
gene_4128	-0.7018	2.77595	0.121884	0.527199
gene_5812	0.643098	3.99604	0.121917	0.527199
gene_5057	-0.531891	5.33413	0.121938	0.527199
gene_7754	0.652118	5.74698	0.121938	0.527199
gene_5873	0.648681	3.71775	0.121959	0.527199
gene_1062	-0.465177	5.52076	0.121987	0.527199
gene_5040	0.66242	4.59328	0.122092	0.527373
gene_6316	-0.776648	4.63221	0.122337	0.528148
gene_4961	0.836131	2.41922	0.122638	0.528278
gene_6834	0.309098	7.36775	0.122648	0.528278
gene_618	0.600754	6.83984	0.122652	0.528278
gene_8185	-0.872096	2.31699	0.122674	0.528278
gene_4338	-0.673276	4.47692	0.122693	0.528278
gene_6685	0.474247	5.38143	0.12278	0.528371
gene_7258	-0.348225	7.56929	0.122975	0.528588
gene_3952	-0.328278	6.61414	0.122988	0.528588
gene_7782	0.443703	5.38615	0.123074	0.528588
gene_3598	-0.928052	1.84194	0.123091	0.528588
gene_7863	0.320846	8.79318	0.123187	0.528718
gene_3756	-0.784217	2.62747	0.123328	0.528746
gene_8241	-1.0573	9.05774	0.123402	0.528746
gene_2220	-0.45794	6.54924	0.123446	0.528746
gene_2916	0.60724	6.60246	0.123511	0.528746
gene_4740	-0.440895	5.2798	0.12352	0.528746
gene_7304	0.335253	7.0598	0.123598	0.528801
gene_2828	-0.675246	9.41509	0.12373	0.529084
gene_361	-0.800677	5.24107	0.123819	0.529188
gene_6637	0.470285	4.49285	0.123966	0.529278
gene_6759	0.778049	8.50134	0.124001	0.529278
gene_6216	0.396269	6.93435	0.124036	0.529278
gene_3531	0.472894	4.94656	0.124211	0.529743
gene_5370	-1.26948	1.60676	0.124519	0.530777
gene_774	-0.353128	6.01833	0.124616	0.530912
gene_2970	-0.495552	6.66327	0.124835	0.53141
gene_682	0.531756	6.8121	0.124971	0.53141
gene_275	-1.35071	3.71685	0.125018	0.53141
gene_5467	1.72067	5.4611	0.125061	0.53141
gene_1697	-1.47761	0.870013	0.125081	0.53141
gene_3911	0.571827	5.23364	0.125126	0.53141
gene_8355	-0.43572	6.73297	0.125306	0.531742
gene_5652	0.802945	4.50257	0.125336	0.531742
gene_3445	-0.978289	2.18661	0.125429	0.531742
gene_5036	-1.34941	1.86335	0.125467	0.531742
gene_7108	0.307842	5.80324	0.125553	0.531827
gene_7400	0.367734	7.01011	0.125636	0.531872
gene_3692	0.42232	8.32493	0.125706	0.531872
gene_1682	0.639754	3.67405	0.125783	0.531872
gene_4155	0.366924	6.76444	0.125853	0.531872
gene_7531	-0.571174	3.89149	0.125892	0.531872
gene_6204	0.394297	6.41506	0.12602	0.531895
gene_6915	1.0374	3.57683	0.126055	0.531895
gene_3897	-0.637713	3.67705	0.126123	0.531895
gene_4211	0.344108	5.56081	0.12616	0.531895
gene_5130	-1.50949	0.182429	0.126253	0.532009
gene_6612	-0.375895	6.5573	0.126377	0.532161
gene_1761	-1.27351	0.677661	0.12642	0.532161
gene_3522	-0.802977	5.40718	0.126532	0.532355
gene_4380	-0.700818	2.5491	0.126777	0.533109
gene_1253	-0.830974	2.52751	0.126981	0.533651
gene_3535	-0.770242	4.31629	0.127066	0.533651
gene_1668	-1.27444	1.20271	0.127104	0.533651
gene_2093	0.608044	6.56785	0.127421	0.534153
gene_5160	0.344581	7.13054	0.127422	0.534153
gene_8288	1.633	-0.591886	0.127492	0.534153
gene_2936	0.396901	6.81591	0.127513	0.534153
gene_3264	-0.436363	5.79503	0.127553	0.534153
gene_7078	0.52079	3.81646	0.127669	0.534364
gene_786	0.469087	4.62839	0.128086	0.53583
gene_2556	-1.19176	6.92003	0.128238	0.53615
gene_391	0.600311	5.83036	0.128327	0.53615
gene_7946	-1.22345	0.533274	0.128361	0.53615
gene_3027	-0.533516	3.49093	0.128462	0.536296
gene_4223	0.400028	5.34503	0.128739	0.536873
gene_7193	0.439989	6.34679	0.128762	0.536873
gene_2029	-0.977998	2.26325	0.128802	0.536873
gene_4974	-0.534838	4.54621	0.128912	0.536873
gene_315	-0.528401	6.45459	0.128968	0.536873
gene_3562	-0.649919	4.51277	0.129013	0.536873
gene_5701	-0.653297	6.7593	0.129064	0.536873
gene_7512	0.543883	3.73456	0.12927	0.536978
gene_4920	-0.873392	9.75606	0.129319	0.536978
gene_7538	-0.956491	6.31431	0.129352	0.536978
gene_2315	0.679239	7.33174	0.129355	0.536978
gene_7908	0.395859	8.32438	0.129683	0.538066
gene_8151	0.600304	4.07823	0.129871	0.538168
gene_5488	0.449394	5.00094	0.129899	0.538168
gene_5575	0.468596	7.09299	0.129907	0.538168
gene_1370	-0.9805	3.53401	0.130046	0.538469
gene_1007	-0.813615	5.42184	0.130572	0.540367
gene_7286	0.512465	7.63953	0.130649	0.54041
gene_7337	-0.868174	1.93279	0.130756	0.540579
gene_77	0.504933	6.91104	0.130991	0.540882
gene_5008	-0.620134	4.71503	0.131196	0.540882
gene_3912	-1.49049	1.975	0.131207	0.540882
gene_2897	-0.398372	5.17652	0.131208	0.540882
gene_6575	-0.88919	3.94686	0.13122	0.540882
gene_5957	0.407323	5.85627	0.13123	0.540882
gene_5228	1.17637	-0.529693	0.131336	0.541045
gene_8467	-0.386171	5.44469	0.131511	0.541373
gene_4978	-1.29213	1.03189	0.13155	0.541373
gene_2652	0.51352	5.91181	0.131672	0.541599
gene_3017	-0.300478	7.3635	0.131764	0.541704
gene_3961	-0.848374	3.87233	0.131969	0.542268
gene_6346	0.416035	4.32027	0.132035	0.542268
gene_7423	0.653305	7.04384	0.132289	0.543035
gene_1004	-0.306231	5.87269	0.132557	0.54386
gene_8620	0.92469	0.974501	0.133043	0.545462
gene_7056	-0.448079	7.45491	0.133082	0.545462
gene_2183	-0.759639	4.50243	0.133562	0.547153
gene_7046	-0.919296	2.20091	0.133714	0.547485
gene_3664	-0.832764	2.33728	0.133779	0.547485
gene_6520	1.36908	-0.465211	0.133977	0.548021
gene_4629	0.326064	6.00465	0.134073	0.548137
gene_6900	1.07031	0.34058	0.134197	0.548366
gene_8616	-0.495249	4.49023	0.134318	0.548546
gene_1097	-0.359692	5.48916	0.134377	0.548546
gene_3417	-1.4592	0.392242	0.134519	0.548644
gene_1625	-0.353567	5.74171	0.134536	0.548644
gene_7342	0.374197	5.36893	0.134813	0.549364
gene_5538	-0.450153	6.77647	0.134901	0.549364
gene_3227	-0.749777	6.53444	0.134916	0.549364
gene_1707	-0.749767	3.59477	0.135064	0.549454
gene_449	-1.24094	0.801135	0.135105	0.549454
gene_1657	-0.282566	5.65963	0.135142	0.549454
gene_168	-0.350139	9.119	0.135389	0.54965
gene_1532	-0.437796	6.08755	0.13543	0.54965
gene_6664	-0.890074	2.41485	0.135438	0.54965
gene_5416	0.370698	5.37039	0.13553	0.54965
gene_4479	-0.586285	3.30821	0.135538	0.54965
gene_1404	-1.23608	0.89386	0.135597	0.54965
gene_3320	-1.05042	2.00021	0.13577	0.550013
[truncated: 6,100 more rows]

## Sheet: Xylose vs. glucose
X	logFC	AveExpr	P.Value	adj.P.Val
gene_4101	5.46145	8.9429	2.13534e-13	1.72941e-09
gene_8085	8.6511	9.4519	1.99081e-12	8.06179e-09
gene_3513	4.11391	8.47956	3.07882e-11	8.25332e-08
gene_4768	7.84294	9.82762	4.13984e-11	8.25332e-08
gene_7871	4.5885	8.4833	6.0185e-11	8.25332e-08
gene_8047	7.32865	12.0345	6.11432e-11	8.25332e-08
gene_570	4.39532	7.10187	2.29776e-10	2.65851e-07
gene_2670	-4.18889	5.19196	5.82468e-10	4.70151e-07
gene_3221	4.62438	7.00257	5.92083e-10	4.70151e-07
gene_4725	-3.19495	8.61853	6.1706e-10	4.70151e-07
gene_3848	4.41178	8.31168	6.38555e-10	4.70151e-07
gene_5606	-3.90296	6.1883	8.36919e-10	5.64679e-07
gene_5983	5.71021	13.117	9.35813e-10	5.64679e-07
gene_5651	3.94106	6.01658	9.76108e-10	5.64679e-07
gene_657	4.32175	7.91369	1.10297e-09	5.95531e-07
gene_2251	-3.04844	8.42596	2.424e-09	1.227e-06
gene_6327	-5.15202	4.14698	3.0974e-09	1.47564e-06
gene_569	5.18987	5.94133	3.35684e-09	1.51039e-06
gene_4739	4.45571	9.08767	4.39023e-09	1.69024e-06
gene_1660	5.6425	10.235	4.46249e-09	1.69024e-06
gene_2053	4.58666	10.2321	4.53817e-09	1.69024e-06
gene_3256	5.6839	13.7969	4.59133e-09	1.69024e-06
gene_4684	3.29158	7.60497	4.84e-09	1.70431e-06
gene_2524	3.22057	6.84055	5.55845e-09	1.87575e-06
gene_8014	8.09801	9.41811	6.45492e-09	2.04729e-06
gene_929	6.15368	8.4114	6.57237e-09	2.04729e-06
gene_2092	2.67838	7.57868	7.00452e-09	2.1011e-06
gene_5407	5.02794	7.73383	7.31978e-09	2.11725e-06
gene_6879	-3.24443	6.36344	8.76559e-09	2.44802e-06
gene_2523	5.30931	9.37057	9.60547e-09	2.57402e-06
gene_7261	-3.9353	5.23919	9.85239e-09	2.57402e-06
gene_2485	6.8998	10.179	1.04426e-08	2.64296e-06
gene_2459	3.84986	5.58853	1.27402e-08	3.12676e-06
gene_8155	3.5296	9.41306	1.64257e-08	3.9127e-06
gene_4944	3.43529	8.48836	1.91857e-08	4.43958e-06
gene_1212	4.20555	7.32595	2.1253e-08	4.78133e-06
gene_7662	2.52841	5.70434	2.23507e-08	4.89239e-06
gene_5524	2.55297	5.44916	2.30004e-08	4.90211e-06
gene_8841	4.03216	9.08162	2.74726e-08	5.70514e-06
gene_3259	3.13535	8.81905	3.16943e-08	6.41731e-06
gene_4510	4.11709	5.92942	3.40087e-08	6.71796e-06
gene_1888	2.6714	7.53595	3.6879e-08	7.1115e-06
gene_1826	3.18667	6.19329	4.39979e-08	8.13862e-06
gene_3409	2.97965	6.84944	4.42153e-08	8.13862e-06
gene_7127	3.5447	7.04842	4.58389e-08	8.24998e-06
gene_2864	-2.46343	8.29468	4.97788e-08	8.76431e-06
gene_4953	2.37879	6.73053	5.13074e-08	8.84125e-06
gene_6321	-4.42205	2.72979	5.66991e-08	9.56679e-06
gene_2305	4.33036	7.66434	5.89173e-08	9.57196e-06
gene_7050	3.83335	13.179	5.90935e-08	9.57196e-06
gene_6158	4.4726	8.47479	6.80417e-08	1.04781e-05
gene_6392	-1.86315	8.41239	6.80719e-08	1.04781e-05
gene_8652	4.16364	6.20019	6.85686e-08	1.04781e-05
gene_2282	-4.13841	4.35446	7.31743e-08	1.09748e-05
gene_6161	4.93027	6.3591	7.52486e-08	1.10807e-05
gene_3169	3.17087	10.535	8.53029e-08	1.23369e-05
gene_2380	-2.40326	8.44751	8.82682e-08	1.25418e-05
gene_6901	2.06475	6.45197	9.37409e-08	1.30898e-05
gene_8203	-1.94559	8.72658	9.63755e-08	1.31873e-05
gene_6796	3.33564	5.78719	9.76957e-08	1.31873e-05
gene_48	2.21429	7.45195	9.98105e-08	1.32519e-05
gene_7889	-2.2672	5.70245	1.09143e-07	1.40781e-05
gene_6258	2.49267	7.21729	1.0951e-07	1.40781e-05
gene_6795	3.56575	9.55402	1.15416e-07	1.44131e-05
gene_7033	2.46717	12.0567	1.15675e-07	1.44131e-05
gene_2241	3.79101	6.32978	1.19912e-07	1.47146e-05
gene_2093	7.47557	6.56785	1.25136e-07	1.51265e-05
gene_8355	-2.54854	6.73297	1.29111e-07	1.51781e-05
gene_2900	3.03425	6.0543	1.29311e-07	1.51781e-05
gene_2405	-1.68577	6.22841	1.33244e-07	1.53397e-05
gene_5472	-3.01228	6.40023	1.34475e-07	1.53397e-05
gene_5948	-2.2329	5.87923	1.43026e-07	1.60884e-05
gene_8873	-3.36444	10.6311	1.48985e-07	1.65292e-05
gene_10	2.31012	8.89379	1.53135e-07	1.676e-05
gene_3645	1.9664	6.61303	1.65796e-07	1.79038e-05
gene_7720	-3.46864	5.04744	1.72673e-07	1.8401e-05
gene_5804	-3.39053	5.62326	1.93204e-07	2.03216e-05
gene_1130	3.61256	6.47834	1.96802e-07	2.04346e-05
gene_5544	6.77074	9.55105	2.01149e-07	2.06215e-05
gene_1744	-3.17169	6.38	2.1048e-07	2.13085e-05
gene_7137	2.99644	9.54456	2.1664e-07	2.14043e-05
gene_1159	2.71931	7.36699	2.19418e-07	2.14043e-05
gene_2962	-2.30648	4.67974	2.21043e-07	2.14043e-05
gene_3201	7.10416	7.92497	2.21998e-07	2.14043e-05
gene_8427	-3.03504	6.93366	2.34894e-07	2.22152e-05
gene_7963	4.54999	9.63714	2.38135e-07	2.22152e-05
gene_7275	2.9302	7.86489	2.38637e-07	2.22152e-05
gene_1597	1.80434	7.03627	2.59956e-07	2.34112e-05
gene_5208	-3.85545	2.43509	2.61544e-07	2.34112e-05
gene_4555	3.13801	6.97626	2.62569e-07	2.34112e-05
gene_759	4.64968	7.06541	2.63047e-07	2.34112e-05
gene_4545	-2.26901	4.77638	2.74086e-07	2.39407e-05
gene_5418	-4.35055	7.57831	2.74909e-07	2.39407e-05
gene_2754	3.42957	5.25461	2.88118e-07	2.46234e-05
gene_8846	-2.19717	6.26837	2.88828e-07	2.46234e-05
gene_7724	4.86828	9.7947	3.10085e-07	2.61602e-05
gene_8370	2.77271	7.5847	3.29186e-07	2.74853e-05
gene_2378	1.9049	7.89125	3.47631e-07	2.87292e-05
gene_3271	3.76747	6.91741	3.8783e-07	3.17277e-05
gene_78	-2.08234	6.43283	4.15389e-07	3.36424e-05
gene_5837	2.2078	6.78029	4.21747e-07	3.38191e-05
gene_5480	2.19458	7.98876	4.26729e-07	3.38831e-05
gene_2888	-2.48993	7.99749	4.37117e-07	3.42753e-05
gene_7099	-3.23712	6.98225	4.40133e-07	3.42753e-05
gene_6449	-4.46972	5.48734	4.46104e-07	3.42807e-05
gene_6852	-2.74067	6.32444	4.48667e-07	3.42807e-05
gene_1848	2.44818	8.62777	4.60208e-07	3.48339e-05
gene_5507	2.61447	6.41795	4.79189e-07	3.58074e-05
gene_3255	3.80099	13.1758	4.81912e-07	3.58074e-05
gene_6573	-2.23554	7.10635	4.91999e-07	3.62246e-05
gene_5720	2.70138	6.82824	5.01777e-07	3.66116e-05
gene_8839	4.95943	5.86281	5.58252e-07	4.03686e-05
gene_298	3.68284	9.28976	5.6908e-07	4.04732e-05
gene_1	1.95033	7.69773	5.69693e-07	4.04732e-05
gene_4686	-2.12229	4.40292	5.78441e-07	4.07373e-05
gene_1910	-2.11678	6.8835	5.88528e-07	4.10904e-05
gene_1313	8.11003	9.53023	5.99449e-07	4.14952e-05
gene_251	7.71112	7.36042	6.05059e-07	4.15286e-05
gene_252	8.1402	5.82282	6.41727e-07	4.36752e-05
gene_1303	2.79242	10.0341	6.53825e-07	4.41278e-05
gene_6433	4.69313	9.96506	6.73813e-07	4.51009e-05
gene_8218	-2.18297	4.5708	6.86349e-07	4.55634e-05
gene_4449	-3.07827	2.94596	7.22292e-07	4.73907e-05
gene_8821	2.78605	7.56598	7.25576e-07	4.73907e-05
gene_623	2.90756	5.37622	7.43979e-07	4.82039e-05
gene_8388	2.52514	7.11972	7.50579e-07	4.82456e-05
gene_152	1.97876	9.46709	8.18775e-07	5.19486e-05
gene_4336	-4.56424	1.38394	8.24292e-07	5.19486e-05
gene_8098	-2.66632	4.35171	8.27431e-07	5.19486e-05
gene_254	-2.4818	5.48853	8.42591e-07	5.24934e-05
gene_4680	-2.11875	6.68341	8.53871e-07	5.27901e-05
gene_7941	-2.08683	8.94073	8.88504e-07	5.45151e-05
gene_904	1.79983	6.38386	9.01743e-07	5.49114e-05
gene_6077	-1.80331	7.04869	9.17928e-07	5.49697e-05
gene_3502	-3.95974	6.98372	9.20314e-07	5.49697e-05
gene_2242	6.75886	8.20797	9.23061e-07	5.49697e-05
gene_4367	-2.32033	3.68213	9.56829e-07	5.65647e-05
gene_8670	3.5135	8.52477	9.88981e-07	5.80417e-05
gene_4062	-3.1247	6.7064	9.99731e-07	5.82505e-05
gene_7049	5.30439	8.06139	1.01589e-06	5.87691e-05
gene_5439	1.66846	7.73572	1.08794e-06	6.24912e-05
gene_5252	-2.75599	5.07835	1.14736e-06	6.54401e-05
gene_2258	-1.59633	6.48026	1.15818e-06	6.55951e-05
gene_137	-2.19436	4.6387	1.174e-06	6.56364e-05
gene_5672	1.44616	7.22837	1.17512e-06	6.56364e-05
gene_8316	2.72434	6.37485	1.19505e-06	6.62923e-05
gene_7143	-1.51229	6.07262	1.37662e-06	7.58451e-05
gene_1588	-2.07866	6.69488	1.41132e-06	7.72316e-05
gene_8810	4.4901	7.34288	1.44491e-06	7.85391e-05
gene_29	1.7778	7.72929	1.507e-06	8.11286e-05
gene_1634	-2.47189	4.45034	1.5143e-06	8.11286e-05
gene_3703	2.07562	8.72652	1.5226e-06	8.11286e-05
gene_3834	3.13096	5.24531	1.5392e-06	8.1477e-05
gene_1448	3.6099	7.22646	1.56804e-06	8.15902e-05
gene_1746	1.6807	7.5475	1.56835e-06	8.15902e-05
gene_2671	-3.54279	3.05789	1.57156e-06	8.15902e-05
gene_3807	5.14503	7.66732	1.58397e-06	8.17106e-05
gene_6632	7.07808	8.94201	1.61774e-06	8.29247e-05
gene_8060	-1.50383	6.02859	1.64775e-06	8.34612e-05
gene_5573	3.80695	5.75939	1.64882e-06	8.34612e-05
gene_2142	2.95871	6.53261	1.73045e-06	8.70491e-05
gene_5785	1.41411	6.30154	1.76055e-06	8.80166e-05
gene_2839	-1.90238	6.96345	1.84133e-06	9.14902e-05
gene_2470	-1.58888	6.3782	1.90397e-06	9.40259e-05
gene_1048	2.25844	6.36159	1.9557e-06	9.56575e-05
gene_1429	4.1822	7.27364	1.96063e-06	9.56575e-05
gene_6980	-3.04166	2.94838	1.99022e-06	9.65196e-05
gene_6488	2.03004	6.32457	2.06984e-06	9.97837e-05
gene_5380	-1.73912	9.01191	2.1054e-06	0.000100897
gene_7919	-1.54985	5.50643	2.32735e-06	0.000110878
gene_256	1.27328	8.15976	2.45244e-06	0.000116154
gene_923	5.42504	5.93636	2.48464e-06	0.000116995
gene_5759	-3.29228	6.52661	2.51986e-06	0.000117738
gene_7433	-2.045	6.43963	2.5295e-06	0.000117738
gene_3248	-3.42871	4.30494	2.73882e-06	0.000126153
gene_6395	3.99623	5.8256	2.74145e-06	0.000126153
gene_7870	3.2742	5.27145	2.84851e-06	0.000130219
gene_6732	-3.74564	2.64002	2.87703e-06	0.000130219
gene_6777	1.97498	10.5306	2.87803e-06	0.000130219
gene_74	4.38794	6.72783	3.02988e-06	0.000136328
gene_8479	2.37881	5.57376	3.05261e-06	0.000136592
gene_2421	2.72487	8.51991	3.07142e-06	0.000136678
gene_2752	3.71312	4.28543	3.16363e-06	0.000140012
gene_1090	1.81048	7.34726	3.25754e-06	0.000143385
gene_4251	1.78082	6.28555	3.29945e-06	0.000144445
gene_285	-2.39173	8.73612	3.39103e-06	0.000147656
gene_7858	-2.03099	7.18018	3.46651e-06	0.000150135
gene_1452	2.18948	9.05696	3.49285e-06	0.000150471
gene_5237	4.09269	4.42071	3.55739e-06	0.000152441
gene_2283	2.45515	9.01749	3.73912e-06	0.000159385
gene_3647	-3.9835	6.65719	3.82493e-06	0.000162189
gene_8748	-2.34909	5.87554	3.86404e-06	0.000162994
gene_3979	-2.5221	5.76243	3.9683e-06	0.000166525
gene_8089	1.50601	7.41978	4.00819e-06	0.000167332
gene_7710	1.85763	6.45028	4.14104e-06	0.000171991
gene_6630	-2.29921	7.12908	4.37518e-06	0.000180789
gene_8608	-4.28379	8.4354	4.45101e-06	0.000182857
gene_41	-1.85396	7.7176	4.48232e-06	0.000182857
gene_8488	1.38762	9.86145	4.49298e-06	0.000182857
gene_8082	-1.93358	6.64249	4.54864e-06	0.000184197
gene_5297	-5.14864	4.78903	4.80349e-06	0.000193549
gene_1529	1.59434	8.23195	4.85043e-06	0.000194233
gene_1072	2.25605	8.55359	4.86841e-06	0.000194233
gene_1604	2.02497	7.70675	4.90037e-06	0.00019455
gene_2567	1.52421	5.92659	4.92923e-06	0.000194741
gene_5933	3.3603	4.35867	5.01665e-06	0.000197135
gene_3864	2.06459	5.83317	5.04279e-06	0.000197135
gene_4679	-2.70693	7.57938	5.0718e-06	0.000197135
gene_8283	2.27402	5.15858	5.0872e-06	0.000197135
gene_2100	4.92694	9.69142	5.19725e-06	0.000199988
gene_1082	-1.8213	6.67081	5.21022e-06	0.000199988
gene_568	1.77753	6.70499	5.42506e-06	0.000207253
gene_3699	-2.85865	3.71368	5.57362e-06	0.000210579
gene_3683	2.82366	7.46604	5.58213e-06	0.000210579
gene_6607	1.73849	5.83022	5.59014e-06	0.000210579
gene_4457	2.81014	5.82084	5.70288e-06	0.000213832
gene_5334	-2.19804	6.83931	5.83567e-06	0.000217802
gene_4298	-2.96625	6.01652	5.89257e-06	0.000218917
gene_914	-2.39103	4.60353	5.97596e-06	0.000220843
gene_5828	-1.38778	9.16529	5.99895e-06	0.000220843
gene_930	9.18875	7.84697	6.03204e-06	0.000221057
gene_55	2.01768	7.06607	6.07395e-06	0.000221075
gene_582	1.99519	8.00284	6.08712e-06	0.000221075
gene_2200	-1.9915	8.30683	6.14617e-06	0.000221458
gene_7795	-2.21309	4.51191	6.17441e-06	0.000221458
gene_7062	-1.33641	6.14455	6.1797e-06	0.000221458
gene_2105	3.92564	5.35981	6.30648e-06	0.000225005
gene_8377	-3.73642	2.87256	6.36835e-06	0.000226216
gene_8759	-2.71282	5.32201	6.43087e-06	0.00022744
gene_8687	2.11046	6.29971	6.62087e-06	0.000233141
gene_7026	2.68696	6.52607	6.65661e-06	0.000233385
gene_2641	2.86382	7.91157	6.76545e-06	0.000236178
gene_8217	1.44034	5.98966	7.02986e-06	0.000244355
gene_8644	2.02762	6.20033	7.21989e-06	0.000249633
gene_8334	1.817	6.46267	7.24332e-06	0.000249633
gene_4222	1.72199	7.40706	7.31431e-06	0.000251011
gene_1270	5.30293	6.71394	7.35759e-06	0.000251431
gene_7973	-4.0088	3.10971	7.41647e-06	0.000252378
gene_2837	-1.78259	11.8059	7.61406e-06	0.000258018
gene_1690	-2.35652	6.23873	8.03516e-06	0.000271153
gene_6437	2.93153	4.88244	8.28341e-06	0.000278371
gene_2090	-2.65545	7.98963	8.3789e-06	0.000280416
gene_6087	-2.92159	5.0816	8.64771e-06	0.000288221
gene_5920	2.64219	3.21765	8.76002e-06	0.000290468
gene_909	1.39609	5.30788	8.78684e-06	0.000290468
gene_3896	1.165	7.65818	9.0405e-06	0.000297638
gene_2113	-2.59835	7.8122	9.15655e-06	0.000299977
gene_4617	1.64704	7.97689	9.18561e-06	0.000299977
gene_2700	3.42252	8.03295	9.44028e-06	0.000307056
gene_8109	2.10576	5.68766	9.71496e-06	0.000314726
gene_4157	1.59065	8.01751	1.01773e-05	0.000325382
gene_209	-2.60766	3.87062	1.01955e-05	0.000325382
gene_3738	-1.63341	8.17608	1.02027e-05	0.000325382
gene_2970	-2.01775	6.66327	1.02234e-05	0.000325382
gene_8747	-2.46847	4.84232	1.02448e-05	0.000325382
gene_3851	4.44067	6.08418	1.0311e-05	0.000326207
gene_6074	3.06493	3.83912	1.05518e-05	0.000332524
gene_320	3.31589	9.31011	1.08205e-05	0.000339672
gene_4957	-3.75545	3.46747	1.11776e-05	0.000349528
gene_3402	4.43159	1.15451	1.13175e-05	0.000352539
gene_5299	-3.5233	3.75843	1.14001e-05	0.000353751
gene_2060	1.71276	8.31624	1.16619e-05	0.000359567
gene_8074	7.26047	5.1591	1.16763e-05	0.000359567
gene_5867	-2.25406	5.10251	1.17441e-05	0.000360286
gene_1949	-2.32605	7.27366	1.20457e-05	0.000368144
gene_3693	-2.41918	4.46342	1.21058e-05	0.00036859
gene_4127	4.35015	2.4707	1.25692e-05	0.000381266
gene_1661	6.0435	3.34101	1.2633e-05	0.000381771
gene_635	2.21473	4.57312	1.27919e-05	0.000385135
gene_1628	4.81934	1.84683	1.28703e-05	0.000385438
gene_4556	4.71787	3.96162	1.28971e-05	0.000385438
gene_5151	-2.08988	3.61863	1.3108e-05	0.000390301
gene_2254	2.74731	5.70994	1.32753e-05	0.000393834
gene_7452	3.85149	8.39229	1.35257e-05	0.000399537
gene_8750	4.45875	9.09996	1.35662e-05	0.000399537
gene_3376	-1.66386	7.2722	1.37602e-05	0.000403552
gene_3967	3.41267	3.7952	1.38022e-05	0.000403552
gene_3949	1.89163	7.30043	1.3871e-05	0.000404106
gene_695	-1.48498	5.97221	1.40003e-05	0.000406411
gene_6035	5.05837	7.13115	1.45372e-05	0.000420489
gene_4233	1.73106	11.1961	1.47268e-05	0.000424457
gene_5695	-2.87345	4.39463	1.49099e-05	0.000428209
gene_6871	-2.02217	5.8883	1.51415e-05	0.000432347
gene_8517	1.87677	5.28792	1.51607e-05	0.000432347
gene_815	5.45939	5.75246	1.53769e-05	0.000436974
gene_6493	3.86745	5.547	1.5507e-05	0.000438673
gene_6978	-1.3397	6.84362	1.56043e-05	0.000438673
gene_8549	2.41479	4.4572	1.56237e-05	0.000438673
gene_5402	1.25542	6.1627	1.56533e-05	0.000438673
gene_4033	-1.91366	6.44584	1.59856e-05	0.000445172
gene_8036	-1.4317	7.08558	1.60689e-05	0.000445172
gene_877	3.8179	7.02574	1.61016e-05	0.000445172
gene_4121	4.34838	1.59871	1.61285e-05	0.000445172
gene_4945	-1.41207	5.18486	1.6202e-05	0.000445172
gene_3782	-4.77947	0.713082	1.62151e-05	0.000445172
gene_3908	-2.34235	4.65075	1.63018e-05	0.000446042
gene_5976	2.433	6.2233	1.63938e-05	0.00044705
gene_7012	2.73406	4.27115	1.64547e-05	0.000447202
gene_5990	3.49334	3.83351	1.67344e-05	0.000453283
gene_2187	2.45219	5.64603	1.72151e-05	0.000464749
gene_8772	2.26528	10.671	1.73998e-05	0.000468176
gene_4480	-2.43511	6.50831	1.77946e-05	0.000477214
gene_3346	-4.49858	6.11702	1.79255e-05	0.000477764
gene_5005	1.82148	6.9663	1.79331e-05	0.000477764
gene_4317	-3.47795	2.55299	1.80445e-05	0.000479156
gene_2639	1.19128	6.88629	1.82793e-05	0.000482055
gene_5070	4.89874	5.69664	1.83063e-05	0.000482055
gene_6548	1.18958	6.6026	1.83323e-05	0.000482055
gene_2115	-1.9158	8.89518	1.87332e-05	0.000491004
gene_2941	-4.35398	4.27089	1.89455e-05	0.000493533
gene_1732	2.60638	9.93225	1.89516e-05	0.000493533
gene_1947	-2.22074	8.89015	1.90215e-05	0.000493766
gene_488	-2.91735	3.2181	1.92388e-05	0.000497811
gene_6007	-1.34623	5.80063	1.96726e-05	0.00050586
gene_2087	5.63666	6.00658	1.96748e-05	0.00050586
gene_8366	2.54787	3.69551	1.98127e-05	0.000507795
gene_7343	1.49408	8.95593	2.00264e-05	0.000511651
gene_3928	2.04161	9.96466	2.0304e-05	0.000517113
gene_4118	5.99546	3.69461	2.05078e-05	0.000519528
gene_1027	-2.438	9.48884	2.05271e-05	0.000519528
gene_5254	-2.04255	4.65637	2.08109e-05	0.00052507
gene_7556	-1.82997	5.39385	2.11242e-05	0.00053132
gene_6019	-2.07872	5.82736	2.13641e-05	0.000534531
gene_187	-1.38197	4.41139	2.13839e-05	0.000534531
gene_5731	-1.94313	4.74266	2.16669e-05	0.000539939
gene_5996	2.5872	5.99171	2.18126e-05	0.000541182
gene_8436	-1.40996	5.6368	2.18504e-05	0.000541182
gene_5825	2.05211	4.09572	2.19837e-05	0.000541865
gene_8505	-2.75219	5.61792	2.20504e-05	0.000541865
gene_5650	-1.95422	7.33277	2.21586e-05	0.000541865
gene_8314	2.20776	5.81679	2.21676e-05	0.000541865
gene_3345	-4.4763	7.73374	2.22125e-05	0.000541865
gene_1642	-1.39683	6.78293	2.2643e-05	0.000549278
gene_50	2.25446	3.86228	2.26775e-05	0.000549278
gene_3980	1.31443	8.06043	2.27831e-05	0.000549278
gene_5646	-2.59533	4.02131	2.28253e-05	0.000549278
gene_953	-1.88387	8.52678	2.28731e-05	0.000549278
gene_6128	-1.86477	5.10679	2.29286e-05	0.000549278
gene_5477	1.97795	11.4454	2.29912e-05	0.000549278
gene_6028	-1.58396	5.20393	2.31328e-05	0.000550964
gene_7773	1.67488	6.05518	2.32493e-05	0.000550964
gene_1164	-1.21122	7.25078	2.32658e-05	0.000550964
gene_1886	-1.87553	5.31449	2.36866e-05	0.000559294
gene_3793	6.55798	7.78266	2.41938e-05	0.00056878
gene_2432	1.50588	6.7433	2.42288e-05	0.00056878
gene_5102	4.97752	5.01824	2.46631e-05	0.000577301
gene_166	1.63206	9.25101	2.48649e-05	0.000577441
gene_8163	1.22151	7.39979	2.48823e-05	0.000577441
gene_6780	-2.27978	4.01192	2.48878e-05	0.000577441
gene_2781	1.94326	8.72376	2.49542e-05	0.000577441
gene_8356	1.86864	7.90395	2.55388e-05	0.000587514
gene_4499	1.89193	4.95011	2.55637e-05	0.000587514
gene_113	5.97133	3.22113	2.56744e-05	0.000587514
gene_7408	2.30349	6.58892	2.56797e-05	0.000587514
gene_2415	-2.97833	9.1378	2.59309e-05	0.00059074
gene_1186	2.94665	4.4395	2.60278e-05	0.00059074
gene_4884	-1.95386	4.13087	2.60979e-05	0.00059074
gene_3797	-1.33041	11.2613	2.61125e-05	0.00059074
gene_1985	-2.02839	5.68898	2.66574e-05	0.000601388
gene_3162	-1.75618	7.94736	2.69284e-05	0.000605814
gene_6716	-3.33081	5.35483	2.70522e-05	0.000606913
gene_4283	-1.77024	5.24992	2.72684e-05	0.000610074
gene_5120	2.13916	4.04688	2.75935e-05	0.000614911
gene_2359	-2.17591	4.69755	2.76365e-05	0.000614911
gene_4316	-1.46103	6.19329	2.78374e-05	0.000617685
gene_1659	-1.8079	5.50121	2.82432e-05	0.000624976
gene_1033	-3.05697	6.8072	2.8408e-05	0.000626343
gene_5799	2.12207	5.16057	2.84596e-05	0.000626343
gene_6091	3.4197	8.32086	2.88001e-05	0.000632119
gene_6771	5.09133	7.24759	2.93533e-05	0.000642519
gene_875	7.80931	9.40233	2.95423e-05	0.000644913
gene_407	2.64396	3.88373	2.97737e-05	0.000648219
gene_8836	1.33047	9.07121	3.02094e-05	0.000655941
gene_7631	-1.4351	7.56153	3.04471e-05	0.000659334
gene_5945	3.2832	6.33552	3.07686e-05	0.000662912
gene_57	2.31933	6.41084	3.0776e-05	0.000662912
gene_2340	-2.48089	4.61986	3.09308e-05	0.000664479
gene_2788	-1.51812	7.06681	3.12329e-05	0.000669194
gene_5000	2.49673	7.7704	3.15077e-05	0.000671641
gene_5525	-1.61356	6.04655	3.1513e-05	0.000671641
gene_7872	-1.72823	5.03159	3.16323e-05	0.000672414
gene_3889	4.23817	5.78808	3.19835e-05	0.000677497
gene_43	-1.63729	8.73869	3.205e-05	0.000677497
gene_7747	-1.25401	7.77267	3.21936e-05	0.000677497
gene_3498	3.69341	3.30125	3.2206e-05	0.000677497
gene_2956	-1.3901	5.06114	3.27002e-05	0.000682279
gene_5158	-1.59241	5.73346	3.27456e-05	0.000682279
gene_817	3.17274	8.95783	3.27813e-05	0.000682279
gene_7718	1.44445	6.60596	3.27881e-05	0.000682279
gene_7218	1.73693	5.79088	3.28545e-05	0.000682279
gene_1351	-2.02414	7.13323	3.30206e-05	0.000683973
gene_787	1.9758	6.75116	3.34988e-05	0.00069211
gene_1839	1.90524	5.26503	3.38898e-05	0.00069473
gene_629	1.0299	6.4877	3.39094e-05	0.00069473
gene_3168	2.09357	7.70443	3.39418e-05	0.00069473
gene_6038	-2.21724	4.74532	3.39688e-05	0.00069473
gene_1419	1.13827	7.27616	3.46702e-05	0.000707289
gene_1314	1.85715	6.57757	3.50816e-05	0.000713884
gene_3722	-1.48142	5.15749	3.52724e-05	0.000715968
gene_1346	-4.31555	4.37525	3.56141e-05	0.000721097
gene_6272	2.71253	5.49166	3.61712e-05	0.00073055
gene_5500	-1.43162	7.08085	3.66913e-05	0.00073921
gene_7207	1.80919	6.88433	3.72278e-05	0.000746316
gene_660	1.33371	6.37869	3.72282e-05	0.000746316
gene_5051	-2.35768	3.95557	3.74277e-05	0.00074818
gene_181	4.63991	7.11507	3.75175e-05	0.00074818
gene_599	-2.12936	5.0027	3.75984e-05	0.00074818
gene_5014	-1.70842	5.2193	3.77788e-05	0.000749929
gene_8440	-1.27725	6.77154	3.79746e-05	0.000751971
gene_4871	2.5814	5.269	3.85027e-05	0.000760354
gene_8393	-1.36561	7.4358	3.85857e-05	0.000760354
gene_1205	2.59887	6.15945	3.92223e-05	0.000771023
gene_6715	-2.13714	5.76549	3.94742e-05	0.000774095
gene_7531	-1.80058	3.89149	3.97159e-05	0.000776954
gene_1387	3.36559	4.98768	4.00129e-05	0.000780879
gene_1057	1.50628	6.92769	4.0145e-05	0.000781572
gene_710	2.12679	5.74269	4.04917e-05	0.000786432
gene_8268	-1.20902	7.21727	4.07097e-05	0.000788774
gene_246	-3.45376	0.821906	4.10634e-05	0.00079373
gene_4743	2.01387	6.84612	4.14302e-05	0.000797677
gene_3054	-1.24579	5.83138	4.14646e-05	0.000797677
gene_3635	-2.74382	4.18309	4.17012e-05	0.000800326
gene_3137	-1.82786	7.17559	4.20715e-05	0.000805351
gene_3846	4.51271	2.67292	4.2168e-05	0.000805351
gene_3984	-2.03527	7.92107	4.22919e-05	0.000805351
gene_2285	2.02342	6.24221	4.23607e-05	0.000805351
gene_5853	1.25502	4.91461	4.25431e-05	0.000806924
gene_58	3.27798	7.76079	4.26891e-05	0.000807801
gene_7848	-1.48957	6.61252	4.29438e-05	0.000810726
gene_1046	6.96635	5.1756	4.40147e-05	0.000829011
gene_8745	2.37658	5.13769	4.41566e-05	0.000829754
gene_5559	1.42912	7.70031	4.46239e-05	0.000836594
gene_5468	2.14863	4.46934	4.50399e-05	0.000842443
gene_7360	2.08469	3.06281	4.51803e-05	0.000843048
gene_8695	-1.36747	9.19128	4.53089e-05	0.000843048
gene_7471	1.94765	5.68481	4.53845e-05	0.000843048
gene_8663	2.29206	7.53655	4.55179e-05	0.000843591
gene_8335	-1.52316	8.13321	4.57936e-05	0.000846763
gene_4935	4.41434	7.75212	4.60676e-05	0.000849889
gene_6036	-2.07829	3.79815	4.66747e-05	0.000858707
gene_3240	-1.80935	5.87895	4.67576e-05	0.000858707
gene_2239	-1.83246	4.99994	4.75194e-05	0.000869126
gene_5360	2.78636	5.06965	4.75395e-05	0.000869126
gene_8619	2.17526	5.96985	4.79836e-05	0.000875269
gene_227	3.0696	3.32575	4.82008e-05	0.000877254
gene_7814	-2.17897	4.80631	4.83397e-05	0.000877811
gene_2125	1.55218	9.27831	4.92141e-05	0.00089169
gene_5707	-1.66269	7.46101	4.99645e-05	0.000903265
gene_5298	-4.75069	5.6762	5.01141e-05	0.00090395
gene_8121	-1.8294	10.0593	5.05871e-05	0.000909944
gene_2026	7.30862	6.89057	5.07138e-05	0.000909944
gene_4599	-1.49978	4.47903	5.08754e-05	0.000909944
gene_1021	-2.57933	5.02571	5.08957e-05	0.000909944
gene_3053	1.32252	5.92003	5.11641e-05	0.000912728
gene_8764	1.66227	4.49453	5.1842e-05	0.000922114
gene_3193	-1.30632	8.1873	5.1918e-05	0.000922114
gene_4943	3.11053	8.25462	5.21406e-05	0.00092404
gene_75	-1.81158	4.45153	5.26271e-05	0.000930627
gene_2307	-3.62845	4.20255	5.33022e-05	0.000940511
gene_6174	2.23288	4.89105	5.3987e-05	0.000950523
gene_4751	-2.16857	4.44377	5.41449e-05	0.000951236
gene_6046	-2.6608	3.85914	5.44248e-05	0.000954083
gene_8656	3.50388	3.68516	5.54901e-05	0.000968298
gene_6312	1.54017	6.81123	5.55273e-05	0.000968298
gene_3958	1.33294	7.50345	5.55944e-05	0.000968298
gene_6099	1.75962	8.63232	5.61264e-05	0.000974277
gene_8139	-2.42603	4.02539	5.62438e-05	0.000974277
gene_6292	1.06549	6.50805	5.62985e-05	0.000974277
gene_7117	1.46145	10.0555	5.68523e-05	0.000981763
gene_873	1.55929	7.4808	5.72943e-05	0.00098596
gene_7714	-1.50759	5.24717	5.73388e-05	0.00098596
gene_120	-3.01823	5.50113	5.80787e-05	0.000996567
gene_6107	-1.11378	8.51922	5.85594e-05	0.000998158
gene_7665	1.67472	7.71494	5.8581e-05	0.000998158
gene_3571	-4.9227	1.68872	5.86144e-05	0.000998158
gene_3416	-2.00515	7.16482	5.86644e-05	0.000998158
gene_4171	-2.56592	6.52344	5.88937e-05	0.000999959
gene_3954	2.31943	5.22256	5.91659e-05	0.00100248
gene_7989	2.3081	3.87985	5.97026e-05	0.00100946
gene_2437	-2.25204	7.20307	6.08993e-05	0.00102449
gene_5223	1.26239	7.49107	6.09915e-05	0.00102449
gene_8093	3.72033	3.79411	6.09955e-05	0.00102449
gene_6635	-1.65794	3.99381	6.10978e-05	0.00102449
gene_4776	3.10988	3.41047	6.16717e-05	0.00103198
gene_5065	1.92863	5.51908	6.20294e-05	0.00103583
gene_7912	-1.15662	6.20491	6.28523e-05	0.00104624
gene_2966	2.05862	8.69648	6.29112e-05	0.00104624
gene_5883	-1.48939	5.74768	6.31798e-05	0.00104855
gene_7654	6.67539	6.06501	6.38725e-05	0.00105788
gene_4605	2.11651	5.10853	6.41054e-05	0.00105957
gene_5441	3.70778	9.3323	6.47731e-05	0.00106655
gene_6112	-1.31336	4.61269	6.47913e-05	0.00106655
gene_7759	-1.77607	6.8418	6.49714e-05	0.00106735
gene_5150	-1.91863	8.44821	6.51326e-05	0.00106783
gene_1493	1.10719	6.66229	6.53815e-05	0.00106975
gene_6638	-1.55835	7.6482	6.5522e-05	0.00106989
gene_5811	1.26995	6.61214	6.58374e-05	0.00107287
gene_8535	-1.31227	7.36518	6.61989e-05	0.0010766
gene_2129	3.51216	4.8518	6.73542e-05	0.00109273
gene_26	1.68709	5.14092	6.74608e-05	0.00109273
gene_7178	1.96258	4.11523	6.77557e-05	0.00109532
gene_4767	-1.75246	5.37043	6.8155e-05	0.00109958
gene_6041	3.76736	6.09007	6.87906e-05	0.00110642
gene_1605	4.92412	2.16884	6.88525e-05	0.00110642
gene_6266	-1.59999	4.92305	6.91913e-05	0.00110966
gene_7880	-2.10096	4.95328	6.95349e-05	0.00111297
gene_6598	1.12182	7.02672	7.00514e-05	0.00111695
gene_6274	-1.41741	4.86851	7.00595e-05	0.00111695
gene_5982	3.98282	3.45917	7.04337e-05	0.00111875
gene_8009	3.94125	2.26459	7.04486e-05	0.00111875
gene_8180	-2.01205	4.93779	7.09716e-05	0.00112485
gene_7188	3.27707	9.17837	7.16838e-05	0.00113392
gene_792	-2.423	7.1314	7.20416e-05	0.00113542
gene_4307	-1.69363	4.06563	7.20588e-05	0.00113542
gene_719	3.84812	5.73785	7.23445e-05	0.0011377
gene_5462	1.52677	7.88513	7.29977e-05	0.00114554
gene_5539	3.49116	6.96429	7.31258e-05	0.00114554
gene_434	2.66049	5.63057	7.3487e-05	0.00114898
gene_4414	2.33785	5.38457	7.52413e-05	0.00117145
gene_7667	3.66793	10.3149	7.53381e-05	0.00117145
gene_4863	4.19026	4.8097	7.53581e-05	0.00117145
gene_493	1.07688	6.29569	7.55947e-05	0.00117288
gene_6642	-2.24743	4.22854	7.72514e-05	0.00119629
gene_4051	2.48836	5.1351	7.75618e-05	0.0011988
gene_6673	-1.69058	5.43476	7.77789e-05	0.00119987
gene_1003	-1.09155	6.28245	7.80327e-05	0.00120044
gene_1977	3.39461	5.10784	7.81121e-05	0.00120044
gene_7451	3.61092	6.75052	7.98662e-05	0.00122507
gene_5323	-2.6039	3.10157	8.02409e-05	0.00122654
gene_2311	6.08626	7.33852	8.02648e-05	0.00122654
gene_668	-1.7248	4.81295	8.07868e-05	0.00123212
gene_5293	1.36882	4.91182	8.09343e-05	0.00123212
gene_2	3.13023	3.42503	8.12634e-05	0.00123481
gene_7950	1.75905	6.6444	8.26456e-05	0.00125346
gene_6008	1.30563	6.40763	8.31345e-05	0.00125852
gene_7722	-3.53884	2.4256	8.3487e-05	0.00125956
gene_3258	-1.61952	6.58162	8.35142e-05	0.00125956
gene_3111	1.41804	6.92074	8.444e-05	0.00127115
gene_2262	-1.08639	6.10798	8.5109e-05	0.00127885
gene_6878	-1.03064	7.2103	8.53585e-05	0.00128022
gene_3777	5.13	7.82008	8.5652e-05	0.00128225
gene_3918	1.94652	5.83324	8.58778e-05	0.00128326
gene_573	4.19336	1.4117	8.66802e-05	0.00129072
gene_1271	4.40484	7.71307	8.66959e-05	0.00129072
gene_5275	-3.52633	8.339	8.68572e-05	0.00129075
gene_540	2.66818	8.07143	8.8007e-05	0.00130313
gene_1064	1.28811	6.67884	8.81731e-05	0.00130313
gene_2055	-1.61009	8.2462	8.8176e-05	0.00130313
gene_4273	-1.1807	5.09539	8.83339e-05	0.00130313
gene_5555	-1.50336	7.16733	8.88763e-05	0.00130874
gene_896	2.28094	6.73438	8.94039e-05	0.00131284
gene_2762	4.55356	4.73601	8.94784e-05	0.00131284
gene_2646	1.17621	6.3179	9.06062e-05	0.00132698
gene_72	-1.00437	6.18333	9.11576e-05	0.00133003
gene_1936	1.3123	7.16991	9.12187e-05	0.00133003
gene_4609	1.65262	5.69882	9.13071e-05	0.00133003
gene_8621	-1.44079	5.08277	9.18114e-05	0.00133497
gene_7866	1.41554	6.65108	9.22967e-05	0.00133963
gene_1649	-1.58398	4.86387	9.29264e-05	0.00134421
gene_8604	-1.58569	7.56215	9.32753e-05	0.00134421
gene_594	3.50388	0.433971	9.34628e-05	0.00134421
gene_1845	2.0063	4.50367	9.35222e-05	0.00134421
gene_5390	-2.29668	5.91917	9.3582e-05	0.00134421
gene_4535	-2.14494	4.80026	9.36085e-05	0.00134421
gene_5222	2.95619	5.35361	9.43411e-05	0.00135233
gene_2297	3.25362	4.78233	9.47501e-05	0.0013558
gene_8416	1.13548	6.37677	9.50212e-05	0.00135728
gene_5064	1.70807	4.33847	9.63167e-05	0.00137135
gene_4760	-1.43435	8.25918	9.63453e-05	0.00137135
gene_5549	-1.31986	7.62753	9.6802e-05	0.00137544
gene_4870	2.91824	8.04514	9.69754e-05	0.00137549
gene_1207	5.06465	2.00713	9.76418e-05	0.00137982
gene_175	1.63277	9.01216	9.79062e-05	0.00137982
gene_6270	-2.25856	4.88203	9.79211e-05	0.00137982
gene_4800	-1.90584	4.17978	9.81698e-05	0.00137982
gene_5176	1.6694	7.90661	9.81802e-05	0.00137982
gene_8467	-1.20476	5.44469	9.83032e-05	0.00137982
gene_4520	-1.5899	5.10303	9.88205e-05	0.00138468
gene_2926	2.39404	7.0414	9.95214e-05	0.0013921
gene_8194	2.79362	5.69491	0.000100058	0.00139719
gene_1810	-1.69079	5.04089	0.000100682	0.00140349
gene_964	-2.0376	4.34652	0.000101946	0.00141678
gene_2161	2.74281	6.50298	0.000101986	0.00141678
gene_8048	-1.29675	5.34577	0.000103436	0.00143276
gene_5080	-1.88027	5.41436	0.00010349	0.00143276
gene_780	1.50197	8.60514	0.000104325	0.00144186
gene_2622	-2.88326	4.30318	0.000104541	0.00144238
gene_537	2.10091	6.28925	0.000104757	0.0014429
gene_4164	1.72092	6.811	0.000105316	0.00144813
gene_7329	-1.59962	4.72246	0.000105787	0.00145215
gene_7156	-1.04139	7.16292	0.000107101	0.0014677
gene_933	1.76426	5.17428	0.000107383	0.00146908
gene_4749	3.09968	5.42582	0.000107687	0.00147075
gene_3377	-1.63127	4.83612	0.000108837	0.00147994
gene_3713	-1.17003	5.68977	0.000108949	0.00147994
gene_6083	-1.36832	6.82219	0.000109073	0.00147994
gene_8792	6.81638	4.73637	0.000109149	0.00147994
gene_1745	3.11674	4.00166	0.000109274	0.00147994
gene_7967	4.36735	5.6301	0.000110795	0.00149804
gene_6487	4.30993	1.90536	0.000111146	0.00150029
gene_3935	-0.902441	6.66008	0.000111975	0.0015071
gene_1626	1.40553	6.1772	0.000112023	0.0015071
gene_24	-1.98462	7.89208	0.00011239	0.00150954
gene_8290	3.19378	3.75478	0.000113313	0.00151503
gene_3431	3.14241	5.88374	0.00011332	0.00151503
gene_8207	2.12038	7.57275	0.000113404	0.00151503
gene_2686	-1.77504	5.86327	0.000113548	0.00151503
gene_7008	3.15537	1.38951	0.000114125	0.00152023
gene_6602	-0.955621	5.84041	0.000114497	0.00152232
gene_6246	1.26449	8.73659	0.000114658	0.00152232
gene_8160	1.76262	6.36047	0.000116008	0.00153773
gene_4156	1.57613	6.36731	0.000117392	0.00155352
gene_2233	1.75263	5.69361	0.000118005	0.00155598
gene_8733	0.978128	6.18926	0.00011812	0.00155598
gene_6307	1.60242	4.96152	0.000118153	0.00155598
gene_7924	-1.48638	7.20129	0.000119515	0.00157135
gene_6874	-1.53136	6.95689	0.00012156	0.00159348
gene_5764	-1.77685	5.59322	0.000121814	0.00159348
gene_8655	4.10374	2.4039	0.000121937	0.00159348
gene_3129	-1.43686	5.33719	0.000121985	0.00159348
gene_2992	-1.84357	5.90728	0.000123625	0.00161108
gene_3037	-1.46881	5.36461	0.00012373	0.00161108
gene_5459	-2.93792	5.63966	0.000124424	0.00161595
gene_3774	-1.20866	7.89802	0.000124503	0.00161595
gene_2227	2.14374	4.93882	0.000125049	0.00162043
gene_4487	2.27556	4.44608	0.000125388	0.00162157
gene_4334	-1.83678	8.46227	0.000125589	0.00162157
gene_6143	-2.10285	9.76679	0.000125737	0.00162157
gene_921	-1.30843	4.78032	0.000128152	0.00164617
gene_6030	-1.36985	6.86016	0.00012823	0.00164617
gene_5342	1.20359	5.29647	0.000128254	0.00164617
gene_8452	-1.83007	7.87028	0.000129527	0.00165987
gene_5703	-0.98149	7.78937	0.000132142	0.00169071
gene_5067	1.80683	6.0752	0.00013483	0.00172238
gene_5409	-1.54428	6.74092	0.000136966	0.00174455
gene_3632	-1.61582	6.73753	0.000137338	0.00174455
gene_3337	2.93753	5.59906	0.000137515	0.00174455
gene_4421	1.83701	5.46886	0.000137711	0.00174455
gene_888	-1.66981	5.69228	0.000137855	0.00174455
gene_7078	1.95342	3.81646	0.000137858	0.00174455
gene_7283	-1.47406	5.7364	0.000138758	0.0017532
gene_4906	-1.50675	5.3934	0.000139289	0.00175538
gene_5125	-3.5575	5.24546	0.000139364	0.00175538
gene_357	0.999304	6.34863	0.000139822	0.00175751
gene_4928	3.50387	3.5955	0.000139967	0.00175751
gene_745	-1.33648	6.12853	0.00014029	0.00175884
gene_2785	-2.23243	7.91869	0.000140991	0.0017649
gene_6004	-2.18752	3.9975	0.000141386	0.00176711
gene_7626	-1.73	9.70151	0.000142816	0.00178023
gene_3874	-2.53971	3.4233	0.000143039	0.00178023
gene_6093	2.44595	6.78002	0.000143272	0.00178023
gene_325	-1.85612	6.09732	0.000143315	0.00178023
gene_5912	1.25594	4.94423	0.000143935	0.00178519
gene_4016	1.37469	5.69322	0.000144288	0.00178684
gene_2647	-2.11123	2.95326	0.000144684	0.001789
gene_4898	-1.31117	10.7668	0.000146148	0.00180282
gene_2576	2.6834	5.59377	0.000146246	0.00180282
gene_7195	3.44918	7.23997	0.000148857	0.0018309
gene_4146	5.18839	4.73987	0.000148977	0.0018309
gene_8730	-1.89704	4.61153	0.00015034	0.00184485
gene_2893	-1.31491	6.18613	0.000150864	0.00184849
gene_7784	2.35072	3.82895	0.000151941	0.00185825
gene_8620	3.88663	0.974501	0.00015212	0.00185825
gene_423	-2.04166	7.89508	0.000152709	0.00186263
gene_6285	1.02315	8.03497	0.000154039	0.00187603
gene_8657	3.94812	2.61143	0.000155331	0.00188893
gene_1996	-2.26923	8.17832	0.000156994	0.001903
gene_4641	3.43649	1.87667	0.000157193	0.001903
gene_890	-1.20049	7.57822	0.000157193	0.001903
gene_3512	1.78902	4.60735	0.000158106	0.00190916
gene_3955	1.5429	5.99212	0.000158173	0.00190916
gene_1068	1.40676	7.48126	0.000158994	0.00191621
gene_8148	-2.32605	3.33749	0.000159962	0.00192501
gene_5026	-2.45137	9.82038	0.000163019	0.00195687
gene_6823	-1.61301	4.68436	0.000163273	0.00195687
gene_3682	-2.26392	5.56928	0.000163334	0.00195687
gene_6709	-1.18813	7.09733	0.0001645	0.00196792
gene_2279	-1.08328	8.67163	0.000165196	0.00197334
gene_5068	3.30019	7.02176	0.000166564	0.00198674
gene_6950	-1.07753	7.369	0.000167551	0.0019949
gene_383	1.15388	5.35166	0.000168063	0.0019949
gene_5119	-2.01076	2.91662	0.000168067	0.0019949
gene_5491	1.4784	4.35186	0.000168232	0.0019949
gene_2455	1.60185	5.27393	0.000169888	0.00200943
gene_3667	-1.86835	7.35442	0.000170029	0.00200943
gene_7337	-2.35102	1.93279	0.000170202	0.00200943
gene_2526	2.18579	3.85995	0.0001706	0.0020112
gene_4936	2.20596	4.17002	0.000172428	0.0020291
gene_3108	-1.07954	6.61035	0.00017262	0.0020291
gene_5599	3.66548	3.87456	0.000173262	0.0020337
gene_8586	-2.80368	5.76747	0.000174465	0.00204486
gene_3808	2.23476	7.08869	0.000175085	0.00204915
gene_3696	-2.06871	5.49126	0.000177231	0.00206881
gene_4710	-5.12108	1.14993	0.00017729	0.00206881
gene_7251	-2.82869	1.94023	0.000177531	0.00206881
gene_6424	-2.19202	3.74152	0.000178439	0.00207641
gene_3074	1.44683	7.39859	0.000178784	0.00207743
gene_8141	-1.74236	4.17779	0.000179425	0.0020819
gene_4064	-1.30557	4.58807	0.000179768	0.00208289
gene_6037	-3.14874	8.22052	0.000180119	0.00208398
gene_2422	-1.10048	6.66841	0.000180779	0.00208863
gene_879	1.69803	11.0956	0.000181275	0.00208981
gene_25	1.41984	4.20838	0.000181397	0.00208981
gene_3707	-2.46731	3.20299	0.000182174	0.00209578
gene_8820	-1.19948	4.75778	0.000183036	0.00210164
gene_7183	5.45402	4.2508	0.000183203	0.00210164
gene_8650	1.35691	8.20295	0.000183489	0.00210195
gene_834	-1.54475	4.95683	0.000186242	0.00213047
gene_5652	4.16924	4.50257	0.000187796	0.00214256
gene_6797	5.85055	3.22771	0.000187828	0.00214256
gene_5447	-2.22578	2.60914	0.000189327	0.00215662
gene_5783	1.06477	6.99375	0.000189593	0.00215662
gene_702	-2.51877	10.0052	0.000190049	0.00215878
gene_3397	2.19817	8.40373	0.000190539	0.00216131
gene_3686	2.83714	2.78025	0.000192974	0.00218407
gene_2988	1.00867	10.1083	0.000193085	0.00218407
gene_3759	1.48092	5.91649	0.000195516	0.00220848
gene_4170	2.74123	4.0795	0.000195997	0.00221083
gene_2102	1.06852	10.4404	0.000196975	0.00221878
gene_6105	1.17113	7.3242	0.000198267	0.00222945
gene_8112	-2.77243	4.92206	0.000198476	0.00222945
gene_3245	1.85799	6.63403	0.000198749	0.00222945
gene_6735	-1.91115	5.51665	0.00019913	0.00223064
gene_4825	2.2871	14.194	0.000201437	0.00225337
gene_7036	3.94871	1.57415	0.000202953	0.00226471
gene_1075	1.77605	7.14233	0.000203011	0.00226471
gene_511	-2.1827	2.98696	0.000205253	0.00228658
gene_5027	2.26108	7.26359	0.000206514	0.00229747
gene_8394	2.5635	5.57804	0.000208922	0.00231811
gene_7651	1.22239	6.61492	0.000208942	0.00231811
gene_8069	-1.98311	4.63147	0.000209964	0.00232626
gene_7594	-2.33373	6.86626	0.000212324	0.0023462
gene_4446	-1.25177	4.62687	0.000212343	0.0023462
gene_5079	1.11314	6.56027	0.000212936	0.00234955
gene_4807	-1.5468	5.48871	0.000215191	0.0023712
gene_1769	-1.09163	5.27419	0.000215548	0.00237191
gene_8731	-2.15932	4.47338	0.000216616	0.00238043
gene_2637	-3.3706	0.764209	0.000220605	0.00241465
gene_8794	5.02292	5.02397	0.000220781	0.00241465
gene_2074	1.46186	6.33555	0.00022084	0.00241465
gene_8514	1.50889	5.38169	0.000220923	0.00241465
gene_7901	0.923253	6.92333	0.000222063	0.00242383
gene_1125	1.08981	6.41922	0.000224209	0.00244397
gene_2264	3.22035	3.75317	0.000225618	0.00245602
gene_54	2.35218	5.17713	0.000226252	0.00245962
gene_7092	-1.54757	4.60563	0.0002301	0.00249809
gene_7547	-2.05553	4.83304	0.000234362	0.00254096
gene_8147	1.50696	5.98929	0.000234711	0.00254134
gene_5941	-3.10206	2.29542	0.000236448	0.00255673
gene_7698	-1.83893	4.17809	0.000237223	0.00256017
gene_5190	1.06078	7.80264	0.000237398	0.00256017
gene_869	-1.13271	5.27439	0.000240031	0.00258512
gene_697	2.9187	6.00921	0.000240721	0.00258911
gene_7423	2.0192	7.04384	0.000241296	0.00259185
gene_928	-2.90991	4.06076	0.000241727	0.0025929
gene_4627	2.96964	4.74871	0.000242234	0.0025929
gene_6686	-1.08762	6.54344	0.000242448	0.0025929
gene_1435	-1.79657	3.61561	0.000242674	0.0025929
gene_1763	1.97101	6.0558	0.000245175	0.00261368
gene_2613	-2.0341	7.7464	0.000245264	0.00261368
gene_6075	4.83336	2.21703	0.00024688	0.00262146
gene_4828	-3.83598	2.58477	0.000247631	0.00262146
gene_1687	3.60886	4.88195	0.000247816	0.00262146
gene_8188	-0.937125	6.34682	0.000247835	0.00262146
gene_5036	-3.43813	1.86335	0.000248195	0.00262146
gene_3200	6.40242	4.19624	0.000248212	0.00262146
gene_5147	1.22911	8.18321	0.00024826	0.00262146
gene_6870	-1.42153	4.49951	0.000248836	0.00262412
gene_4854	-2.52945	3.53625	0.000251759	0.00265149
gene_7523	-1.00236	5.17859	0.00025274	0.00265837
gene_2381	-1.8758	7.42184	0.000254683	0.00267533
gene_8253	1.71111	6.6808	0.000256298	0.00268881
gene_2556	-3.80707	6.92003	0.000258114	0.00270436
gene_2164	-0.94233	6.73305	0.000261913	0.00273358
gene_1097	-1.03121	5.48916	0.000261988	0.00273358
gene_7728	-1.53721	6.10391	0.000262034	0.00273358
gene_1548	4.02844	1.64994	0.000262253	0.00273358
gene_4153	-1.9364	6.2757	0.000264478	0.00275322
gene_596	-1.52459	12.8916	0.000264817	0.00275322
gene_5490	-1.16119	9.83048	0.000265246	0.00275414
gene_3311	3.1293	2.09583	0.000265853	0.0027569
gene_8213	-1.57522	4.04151	0.000268417	0.00277993
gene_5045	-3.2157	2.6394	0.000270099	0.00279378
gene_5503	-1.38561	4.03973	0.000270986	0.00279938
gene_2315	2.00491	7.33174	0.000271769	0.0028039
gene_2595	1.03469	5.3353	0.000272512	0.00280798
gene_5314	1.15907	7.53492	0.000273766	0.00281732
gene_3520	-1.59985	4.89582	0.000274743	0.00282379
gene_15	1.76934	4.23343	0.000276785	0.00284117
gene_3106	1.43332	6.72311	0.000278385	0.00285135
gene_8001	1.17304	7.20001	0.000278481	0.00285135
gene_1506	2.72952	5.36258	0.000285565	0.00291817
gene_1007	-2.28229	5.42184	0.000285728	0.00291817
gene_1166	2.57766	4.66992	0.00028757	0.0029312
gene_2199	3.83243	1.66623	0.000287727	0.0029312
gene_5934	1.56769	6.64228	0.000291197	0.00296282
gene_8630	-1.06211	4.70209	0.000292104	0.00296524
gene_4777	1.80589	5.26344	0.000292497	0.00296524
gene_7664	3.67465	2.48598	0.000292533	0.00296524
gene_3277	-1.37611	5.68817	0.00029298	0.00296605
gene_8224	1.66173	4.82375	0.000293486	0.00296747
gene_1871	3.64449	1.74884	0.000295027	0.00297934
gene_1436	-1.52807	5.47938	0.000296374	0.00298513
gene_922	-2.04249	2.90113	0.00029669	0.00298513
gene_5326	-1.72174	5.67646	0.000296707	0.00298513
gene_7370	1.12522	8.11385	0.000298573	0.00300018
gene_7434	-1.71517	6.46225	0.000301456	0.00302539
gene_7048	6.95707	3.75353	0.000304741	0.00305458
gene_60	-2.06377	3.58831	0.000305289	0.00305628
gene_8582	-1.79728	7.80225	0.00030631	0.00306198
gene_4735	-1.98658	8.7498	0.000306614	0.00306198
gene_3463	1.47195	7.20136	0.000310194	0.00309392
gene_3493	-0.940544	8.22129	0.000311861	0.00310672
gene_3621	0.921573	10.2646	0.000312317	0.00310744
gene_1050	-2.16265	2.83899	0.000314191	0.00312225
gene_7342	1.16703	5.36893	0.000317724	0.00315349
gene_1893	2.07991	3.93951	0.000320174	0.00317298
gene_3029	-1.02913	7.05101	0.000320471	0.00317298
gene_814	5.19109	2.87176	0.000321428	0.00317856
gene_4734	0.97228	6.79172	0.000322133	0.00317985
gene_1015	-1.38749	6.07273	0.000322343	0.00317985
gene_5919	4.35726	4.78667	0.000327027	0.00322027
gene_3556	-2.02357	4.49804	0.000327235	0.00322027
gene_4286	-2.69698	3.59983	0.000328276	0.00322659
gene_4721	-1.83972	5.30514	0.000330628	0.00324577
gene_1041	1.01277	6.40724	0.000331507	0.00325045
gene_2615	0.831585	6.18779	0.000334148	0.00327239
gene_6	0.938451	6.88334	0.000337109	0.0032974
gene_6867	-3.91918	1.09466	0.00033899	0.00331179
gene_7491	-0.887597	6.63983	0.000340097	0.00331861
gene_306	-2.33171	7.15019	0.000340664	0.00331997
gene_1803	-1.52748	5.56753	0.000341056	0.00331997
gene_3669	-1.87741	4.71472	0.000344598	0.0033503
gene_8236	1.87163	7.68377	0.000345011	0.0033503
gene_8043	-0.980968	5.77566	0.000345413	0.0033503
gene_8438	0.883418	6.04574	0.000346139	0.00335333
gene_598	-1.2246	5.82883	0.000348766	0.00337474
gene_1758	-1.93279	4.41947	0.000349365	0.00337599
gene_5126	1.28459	5.00625	0.000349729	0.00337599
gene_3378	-1.50933	3.7374	0.0003524	0.00339772
gene_2755	1.45767	4.97923	0.000353179	0.00339887
gene_6495	1.43404	6.79792	0.000353358	0.00339887
gene_2706	-1.25732	5.55906	0.000354598	0.00340674
gene_7697	-2.41245	4.60655	0.000355217	0.00340866
gene_6817	1.3981	4.40535	0.000356276	0.00341477
gene_7566	-1.84276	8.25138	0.000356805	0.0034158
gene_2683	1.51905	5.40773	0.000357322	0.00341671
gene_5501	-1.25241	7.32947	0.000358385	0.00342283
gene_5985	1.13366	5.58974	0.000359339	0.0034279
gene_3171	-1.46397	5.60791	0.000362459	0.00345359
gene_7425	2.28032	6.26157	0.000364686	0.00346728
gene_891	-1.2772	5.96973	0.000365582	0.00346728
gene_7863	0.873535	8.79318	0.000365675	0.00346728
gene_1882	1.36376	7.63154	0.000365859	0.00346728
gene_5426	-1.56911	4.93436	0.000366036	0.00346728
gene_1511	-1.31484	4.83723	0.000367297	0.00347516
gene_4450	3.62407	1.77241	0.00037009	0.0034975
gene_5201	1.03433	7.42883	0.000375629	0.00354571
gene_4597	-1.01398	5.65513	0.000377766	0.00356173
gene_5879	1.26285	4.81065	0.000381839	0.00359199
gene_6733	-2.37139	7.23789	0.000381862	0.00359199
gene_1997	1.56608	7.45511	0.000382652	0.00359525
gene_8088	2.36079	5.97916	0.000383809	0.00360193
gene_1972	5.01371	4.09024	0.000384765	0.00360673
gene_7797	1.03172	10.4474	0.000385235	0.00360695
gene_7190	-1.76468	5.89431	0.000385784	0.00360792
gene_3094	-1.62034	6.17004	0.000386296	0.00360855
gene_2744	-2.13557	8.29121	0.000388302	0.00362311
gene_6595	-2.26883	0.945101	0.000389804	0.00363055
gene_6979	-0.869312	6.09729	0.000390298	0.00363055
gene_8054	-1.59994	4.33158	0.000390445	0.00363055
gene_5476	1.02563	7.5804	0.000391427	0.00363506
gene_862	1.98686	4.70832	0.000391827	0.00363506
gene_797	3.47151	3.35017	0.000393359	0.0036451
gene_3957	-1.52043	9.94647	0.000394547	0.00365193
gene_1655	-2.01344	6.62724	0.000396036	0.00366153
gene_8367	2.79616	5.81738	0.000398286	0.00367813
gene_885	-1.8787	6.14785	0.000400787	0.0036962
gene_247	2.78079	5.09901	0.000401156	0.0036962
gene_5181	-1.71635	7.07184	0.000404881	0.00372629
gene_3325	-2.10812	3.80231	0.000409264	0.00375998
gene_5526	-1.28139	8.70174	0.00040947	0.00375998
gene_222	1.34761	7.84159	0.000410645	0.0037665
gene_6828	-2.79784	3.05745	0.000412514	0.00377935
gene_8761	1.47397	6.18538	0.000418196	0.00382708
gene_7120	-2.0632	3.98035	0.000418749	0.00382782
gene_6683	2.40817	3.79411	0.000423961	0.0038711
gene_1165	1.65273	5.61026	0.000424846	0.0038748
gene_3875	-1.16852	5.81229	0.000426136	0.0038822
gene_8497	1.98248	6.09131	0.000427013	0.00388582
gene_3762	-4.26267	5.1236	0.000437569	0.00397741
gene_7619	3.15147	3.324	0.000440538	0.00399991
gene_7755	-1.36298	8.96809	0.000442753	0.00401551
gene_7820	-1.81803	7.12707	0.00044552	0.00403178
gene_7135	1.28299	6.28294	0.000445542	0.00403178
gene_809	-1.35347	4.95319	0.000448282	0.00404412
gene_4603	1.23708	6.82688	0.000448309	0.00404412
gene_948	2.96417	0.454434	0.000448403	0.00404412
gene_4299	-2.05537	4.94969	0.000449304	0.00404773
gene_7686	-1.14522	7.24071	0.000449915	0.00404874
gene_3832	5.696	2.41454	0.000450683	0.00405114
gene_850	-1.48266	5.3032	0.000454712	0.00408064
gene_7782	1.29345	5.38615	0.000454972	0.00408064
gene_7928	-0.819927	6.49398	0.000457151	0.00409425
gene_228	8.1533	5.50886	0.0004575	0.00409425
gene_790	-1.69711	7.16005	0.000458405	0.00409782
gene_4531	-1.27002	5.02236	0.00045918	0.00409882
gene_1000	0.987787	6.90655	0.000459965	0.00409882
gene_444	-0.893783	9.19995	0.000460036	0.00409882
gene_5140	-1.60604	5.96103	0.000462263	0.00411414
gene_7139	1.94392	5.84007	0.00046366	0.00412205
gene_1255	-1.77589	3.3165	0.000465694	0.00413558
gene_567	-1.97832	5.82652	0.000467714	0.00414897
gene_1094	-0.932207	5.39814	0.000469952	0.00416427
gene_1860	1.37339	6.13558	0.000472971	0.00418644
gene_6803	0.876512	6.7286	0.000473612	0.00418753
gene_7904	2.43165	2.78748	0.000478387	0.00422515
gene_8742	2.99504	1.43281	0.00048059	0.00423998
gene_7161	1.00086	7.7913	0.000486463	0.00428391
gene_2098	2.72218	4.57919	0.00048709	0.00428391
gene_6703	-1.74951	3.25605	0.000487245	0.00428391
gene_2920	5.00897	2.2225	0.000487686	0.00428391
gene_4692	1.27496	6.33427	0.000489124	0.00429189
gene_4836	-0.805514	7.37366	0.000490276	0.00429447
gene_2403	2.86369	5.27642	0.000490478	0.00429447
gene_1474	0.860653	6.33287	0.000493688	0.0043179
gene_5964	3.09091	7.94928	0.000494793	0.0043229
gene_7677	-1.49496	7.98791	0.000495967	0.00432849
gene_6014	1.01938	6.88314	0.000497005	0.00432944
gene_8611	1.81699	5.75003	0.000497146	0.00432944
gene_7180	1.45394	7.62852	0.000498258	0.00433442
gene_5122	2.33937	4.07724	0.000498787	0.00433442
gene_6448	-1.01004	6.26382	0.000499621	0.00433701
gene_6175	3.08362	1.97266	0.000503314	0.00436105
gene_6928	-1.0353	5.30507	0.000503467	0.00436105
gene_111	1.18188	5.67474	0.000505276	0.00437167
gene_755	1.54384	3.86708	0.000505773	0.00437167
gene_2929	-1.2425	5.11995	0.000507087	0.00437726
gene_4581	-1.90055	8.49846	0.000508357	0.00437726
gene_766	-1.60154	6.1367	0.000508474	0.00437726
gene_1206	3.92316	5.19978	0.000508581	0.00437726
gene_8252	-1.38455	7.30633	0.000509202	0.00437795
gene_5863	2.26436	4.77692	0.000510536	0.00438476
gene_1209	6.69832	5.21054	0.000513659	0.00440691
gene_8411	0.888812	6.16239	0.000514386	0.00440848
gene_7338	1.83693	4.27493	0.000516444	0.00442144
gene_3198	-1.80287	4.67821	0.000517772	0.00442813
gene_7007	6.27457	6.34391	0.000521157	0.00445238
gene_7965	2.32296	5.77717	0.000522874	0.00445687
gene_5142	1.29599	4.28667	0.000522991	0.00445687
gene_3238	1.37448	5.08499	0.000523543	0.00445687
gene_7019	-1.08336	5.22176	0.000523884	0.00445687
gene_8205	-1.22548	9.09623	0.000526022	0.00446863
gene_4527	4.35954	4.57395	0.000526371	0.00446863
gene_189	-2.19281	3.26082	0.000527293	0.00447177
gene_6050	-0.92962	6.58329	0.000527972	0.00447217
gene_4774	-3.2281	8.81415	0.000528444	0.00447217
gene_5787	1.49771	4.5426	0.000530631	0.00448466
gene_7625	0.875194	6.75932	0.000531027	0.00448466
gene_4759	-1.65788	8.28822	0.000533135	0.00449777
gene_603	3.08899	2.89209	0.000537695	0.00453152
gene_818	2.46976	5.89828	0.000538342	0.00453164
gene_4933	-1.54252	6.03616	0.000538828	0.00453164
gene_7946	-2.9371	0.533274	0.000539444	0.00453212
gene_463	2.87614	1.21321	0.000540141	0.00453327
gene_3710	-2.09044	8.22147	0.000544033	0.00456121
gene_1468	-1.23639	4.53306	0.000547206	0.00458306
gene_1322	0.887569	5.61362	0.00054939	0.0045966
gene_5771	-0.979332	5.74984	0.000551214	0.00460448
gene_3018	1.08401	7.48399	0.000552076	0.00460448
gene_2650	-2.72377	4.09192	0.000552848	0.00460448
gene_3731	-2.59727	5.46661	0.000553081	0.00460448
gene_1044	-0.985966	7.30229	0.000553175	0.00460448
gene_5055	-1.373	5.71812	0.000555035	0.00461495
gene_3506	1.38272	5.38304	0.000555572	0.00461495
gene_1844	1.20217	5.93615	0.000556895	0.00462042
gene_474	2.25269	4.41821	0.000557372	0.00462042
gene_7047	4.40668	4.60134	0.000558075	0.00462152
gene_513	-1.35076	4.64613	0.000561621	0.00464614
gene_7353	-1.07158	6.36451	0.000562453	0.00464827
gene_2095	3.49653	5.80388	0.000565848	0.00467157
gene_3689	-2.78738	2.46742	0.000567581	0.0046777
gene_2763	5.0079	1.67606	0.000567746	0.0046777
gene_119	-1.86052	5.33066	0.000569494	0.00468733
gene_462	5.72257	4.90934	0.00057189	0.00470156
gene_3136	-2.39538	4.28024	0.000572646	0.00470156
gene_3274	1.31963	9.76133	0.000572964	0.00470156
gene_3401	-1.9738	6.80357	0.000573928	0.00470215
gene_5851	1.55912	6.14672	0.000574198	0.00470215
gene_671	2.65489	3.05654	0.000578273	0.00472631
gene_183	-1.96096	3.93662	0.000578496	0.00472631
gene_2439	-1.75175	6.5224	0.000579445	0.00472631
gene_5609	5.17338	5.66166	0.000579482	0.00472631
gene_5984	3.41847	2.7086	0.000580904	0.00473314
gene_2086	-1.89685	4.17909	0.000582542	0.00473796
gene_6864	1.77564	3.1713	0.000582665	0.00473796
gene_6267	-0.919366	7.40688	0.000585627	0.00475726
gene_4861	-1.83996	5.09097	0.000587255	0.00476186
gene_6514	1.42666	6.28452	0.000587698	0.00476186
gene_3787	-1.31262	6.13464	0.000587957	0.00476186
gene_5623	1.86438	3.85744	0.000590478	0.0047775
gene_4046	1.24693	8.45648	0.000593146	0.0047943
gene_7933	1.97775	2.21819	0.00059575	0.00481055
gene_7018	-1.38459	5.6741	0.000599214	0.00483177
gene_5884	-0.804548	6.25469	0.000599571	0.00483177
gene_4787	-1.18864	6.36248	0.000600498	0.00483443
gene_7892	1.77368	3.23204	0.00060314	0.00485087
gene_4554	3.69027	2.2824	0.000607569	0.00488115
gene_5724	1.52222	9.46507	0.000608733	0.00488115
gene_3517	6.79579	5.0453	0.000608878	0.00488115
gene_8509	0.99809	7.58367	0.000609315	0.00488115
gene_685	-1.09764	6.38314	0.000610354	0.00488464
gene_2212	-1.56242	4.3161	0.000611501	0.00488899
gene_6542	-1.67482	7.51736	0.000613587	0.00490083
gene_6653	-1.36243	5.54769	0.000620044	0.00494752
gene_7394	1.02018	7.94314	0.000620975	0.00495007
gene_5022	1.71232	4.25236	0.000622659	0.00495862
gene_8038	-2.04091	4.59585	0.000625645	0.00497751
gene_1909	-2.61989	2.89153	0.000626545	0.00497977
gene_1840	1.22409	6.43339	0.00062816	0.00498772
gene_1279	2.19223	4.98951	0.000628835	0.00498819
gene_4072	-1.20754	5.90125	0.00063203	0.00500862
gene_5769	-1.15637	3.67379	0.000633799	0.00501773
gene_5522	2.44257	1.82144	0.000636223	0.005032
gene_6060	1.86607	4.05244	0.000638416	0.00504442
gene_3085	-1.05322	6.01705	0.000639921	0.00505139
gene_5967	-2.40121	3.13298	0.000640642	0.00505215
gene_539	1.65265	3.99071	0.000643243	0.00506773
gene_8125	-2.046	2.31851	0.000644077	0.00506937
gene_4783	-1.06697	6.04046	0.000645472	0.00507541
gene_7916	1.39543	6.90223	0.000646178	0.00507604
gene_4134	-1.95569	6.60641	0.000646819	0.00507615
gene_4801	-1.75488	3.29815	0.000649999	0.00509617
gene_1943	1.28399	5.02783	0.000650876	0.00509811
gene_7909	0.743535	7.26134	0.000656171	0.00513456
gene_4119	6.31502	3.12577	0.000656819	0.00513456
gene_8782	3.29569	2.24223	0.000657432	0.00513456
gene_8196	1.50649	6.00475	0.000660502	0.00515357
gene_3679	3.69173	1.75506	0.000665133	0.00517937
gene_127	-2.33345	3.4339	0.000665704	0.00517937
gene_7479	-1.55692	7.7526	0.000666171	0.00517937
gene_3852	-2.39922	5.61887	0.000666367	0.00517937
gene_738	1.70506	4.35218	0.000668445	0.00518834
gene_8392	-1.39353	3.9014	0.000668802	0.00518834
gene_6498	-1.85291	5.23798	0.000674239	0.00522544
gene_600	1.32021	6.55731	0.000674995	0.00522544
gene_604	7.62139	4.54067	0.00067552	0.00522544
gene_5903	-1.50043	4.96925	0.000676384	0.00522713
gene_4344	-0.966411	7.37317	0.000681863	0.00526445
gene_6536	-1.25499	6.68747	0.000683839	0.00527465
gene_7416	-1.89306	8.24734	0.000684568	0.00527465
gene_7390	-0.874636	5.62203	0.000685138	0.00527465
gene_3861	-1.1933	7.34128	0.000686816	0.00528255
gene_3873	0.860947	6.12677	0.000688705	0.00528711
gene_4430	-2.4071	5.05731	0.000688715	0.00528711
gene_8472	-1.60322	6.43906	0.000690726	0.00529521
gene_7129	1.7167	6.01316	0.000691255	0.00529521
gene_593	-1.12986	6.34706	0.000691731	0.00529521
gene_8007	5.3265	5.42922	0.000694759	0.00531189
gene_279	1.97891	8.11524	0.000695222	0.00531189
gene_4696	-1.18291	7.19999	0.000699614	0.00534041
gene_5361	1.20814	7.63375	0.000700331	0.00534085
gene_7504	-2.14487	5.43388	0.000702427	0.00535179
gene_6924	-2.37747	10.5747	0.000703233	0.0053529
gene_5194	-1.5614	8.32183	0.000705057	0.00536174
gene_1028	-2.52374	5.84074	0.000706419	0.00536347
gene_4024	1.15886	6.15207	0.000706609	0.00536347
gene_8626	3.96344	6.48551	0.000709595	0.0053811
gene_2436	-1.216	4.98071	0.000713228	0.00540359
gene_2901	5.85157	4.79687	0.000717893	0.00543384
gene_7055	1.2789	6.60184	0.000719257	0.00543785
gene_6648	-1.52973	5.61273	0.000719764	0.00543785
gene_4143	0.898662	8.16805	0.000723631	0.00546087
gene_4633	-1.87873	4.28634	0.00072416	0.00546087
gene_2740	-1.33211	4.44844	0.000727394	0.00548015
gene_2558	1.30001	7.39001	0.000731232	0.0055018
gene_1838	-1.0516	6.08527	0.000731765	0.0055018
gene_887	1.10728	11.7742	0.000732305	0.0055018
gene_1320	-1.0072	5.49038	0.000733491	0.0055056
gene_6293	-1.17305	5.92229	0.000735997	0.00551929
gene_4658	-0.903127	7.49583	0.000738498	0.00553293
gene_253	2.97168	0.968838	0.000741348	0.00554915
gene_8162	-0.914955	6.40049	0.00074617	0.00558008
gene_5929	1.28127	5.2122	0.000749728	0.0055992
gene_8732	1.50599	5.76008	0.000750109	0.0055992
gene_7620	-1.32301	4.55151	0.000750954	0.00560035
gene_4198	-1.52062	4.23821	0.000754492	0.00562156
gene_4151	-0.77265	8.04454	0.00075531	0.00562248
gene_550	-2.14577	4.69512	0.000757004	0.00562532
gene_7162	2.70054	5.36745	0.000758786	0.00562532
gene_8182	-1.0894	6.00308	0.000758892	0.00562532
gene_4838	1.07994	7.46788	0.000759061	0.00562532
gene_56	2.91665	7.82868	0.000759164	0.00562532
gene_3739	2.63442	6.44941	0.000760381	0.00562855
gene_5939	-1.28305	5.1972	0.000760991	0.00562855
gene_709	1.70119	4.60092	0.000762671	0.0056335
gene_2919	4.27444	2.70629	0.000763051	0.0056335
gene_584	-1.29677	6.36359	0.000764883	0.00564188
gene_7689	1.02203	7.80181	0.000765802	0.00564352
gene_390	1.86523	2.8242	0.000769978	0.00566914
gene_5232	-1.32757	6.58465	0.000775775	0.00570663
gene_4019	1.25417	7.46712	0.000780494	0.00573614
gene_4791	3.06076	2.36811	0.0007828	0.00574787
gene_2110	0.949988	7.94786	0.000785375	0.00576155
gene_2088	-1.58589	5.5424	0.000787886	0.00577381
gene_3550	-1.05417	5.50158	0.000788472	0.00577381
gene_6418	4.17452	6.0357	0.000791466	0.0057905
gene_4926	1.24837	5.91525	0.000793234	0.0057982
gene_3353	0.84566	6.4812	0.000797906	0.00582709
gene_6185	-0.927719	6.14756	0.000802423	0.00585479
gene_7570	-2.50785	4.62976	0.000805282	0.00587037
gene_8051	1.89062	9.60289	0.000807042	0.00587791
gene_4404	2.5083	1.85638	0.000808617	0.00588409
gene_7141	-1.28049	4.94673	0.000812755	0.00590889
gene_5942	-1.58141	4.38184	0.000817534	0.0059383
gene_173	2.34732	5.9239	0.000819346	0.00594613
gene_3650	-1.43867	4.97155	0.000821173	0.00595054
gene_4497	-2.53145	2.44894	0.000821499	0.00595054
gene_3624	1.34805	7.40418	0.000822158	0.00595054
gene_284	1.0144	4.84887	0.000823133	0.00595228
gene_6151	3.80772	3.6956	0.000824418	0.00595625
gene_8653	-3.50651	-0.105101	0.000828668	0.00597861
gene_5551	-1.12848	9.28354	0.000828988	0.00597861
gene_706	2.00676	3.47343	0.000830484	0.00598407
gene_2278	-1.38137	3.7141	0.000832367	0.0059923
gene_338	-1.44823	4.51809	0.000843093	0.00606413
gene_2769	-1.32375	4.80808	0.0008447	0.00606622
gene_7439	-1.29368	6.23783	0.000845291	0.00606622
gene_562	1.24804	8.54864	0.00084563	0.00606622
gene_2181	-0.842932	8.3546	0.000846877	0.00606978
gene_2867	-1.18202	4.72978	0.000850602	0.00609109
gene_4667	3.7273	4.45017	0.000852973	0.00610267
gene_7325	-1.6961	8.32115	0.000855231	0.00611343
gene_4636	-1.71516	4.44903	0.000856058	0.00611394
gene_6078	-0.825527	5.41854	0.000857183	0.00611659
gene_1269	2.50857	5.06041	0.000860956	0.0061381
gene_5154	1.36619	6.349	0.000863689	0.00615217
gene_6986	1.75634	6.33709	0.000867742	0.00617329
gene_4229	1.65855	4.68343	0.000868178	0.00617329
gene_420	-1.13655	7.91105	0.000871168	0.006185
gene_3845	3.74471	5.6505	0.000871439	0.006185
gene_7177	0.85025	9.25834	0.000872173	0.006185
gene_2987	0.951112	8.0127	0.00087288	0.006185
gene_5552	-0.907923	7.91085	0.000877866	0.0062149
gene_6247	-1.36192	5.55623	0.000881685	0.00623648
gene_2861	-2.17646	3.73583	0.000883215	0.00624185
gene_7265	-2.28569	4.89612	0.000888915	0.00627665
gene_1809	1.63624	4.34872	0.000890287	0.00628086
gene_5709	-1.31221	5.81107	0.000893211	0.00629601
gene_305	-1.11666	5.93985	0.000895746	0.00630839
gene_4460	1.77441	6.49474	0.000899277	0.00632612
gene_5557	-1.61289	6.9168	0.000899826	0.00632612
gene_730	-1.20981	5.65862	0.000900865	0.00632793
gene_5538	-1.19539	6.77647	0.000906246	0.00636021
gene_1586	1.06319	5.37352	0.000907759	0.00636532
gene_1380	-0.933055	6.55727	0.000909266	0.00637037
gene_8064	1.79572	6.17037	0.000913852	0.00639155
gene_3264	-1.0847	5.79503	0.000913868	0.00639155
gene_8347	-1.11661	5.83252	0.00091546	0.00639716
gene_7634	1.34435	4.6164	0.000919227	0.00641795
gene_2687	1.17807	5.10341	0.000920464	0.00642105
gene_6927	0.961685	4.71146	0.000921631	0.00642366
gene_2353	-1.44374	5.01643	0.000922507	0.00642423
gene_4475	2.05706	4.65433	0.000925769	0.00643969
gene_5928	-2.24575	1.68693	0.000926574	0.00643969
gene_943	0.916852	5.15067	0.000928421	0.00643969
gene_3533	1.21133	4.27907	0.000928666	0.00643969
gene_8124	-1.16839	6.9897	0.000928703	0.00643969
gene_1764	2.7138	6.2107	0.000930011	0.00644325
gene_4028	-1.08617	5.11994	0.000931602	0.00644875
gene_3050	0.977703	6.57918	0.000933404	0.00645571
gene_1631	4.33641	2.13282	0.0009343	0.0064564
gene_6609	-0.960083	7.9115	0.000937466	0.00647275
gene_2097	2.31946	5.85578	0.000940145	0.00648572
gene_5355	-1.42161	5.72004	0.000944944	0.00651328
gene_290	-1.04141	7.90869	0.000946214	0.00651649
gene_3761	1.67938	4.38125	0.000950683	0.0065417
gene_4199	-1.12717	5.12067	0.000951621	0.0065426
gene_1587	-2.25275	2.06318	0.000952878	0.00654568
gene_2851	1.00761	6.56286	0.000954732	0.00655286
gene_7521	1.09118	5.87005	0.000960019	0.0065781
gene_6071	1.80024	6.15773	0.000960033	0.0065781
gene_5681	-1.49564	8.76315	0.000963555	0.00659664
gene_7498	0.878995	6.62528	0.000964881	0.00660014
gene_1383	-1.37076	4.27024	0.000974725	0.0066571
gene_6187	1.85427	6.17308	0.000974851	0.0066571
gene_5864	3.61912	7.58978	0.000981045	0.0066884
gene_236	-1.02286	4.86235	0.0009818	0.0066884
gene_2838	-1.76124	5.08386	0.000981913	0.0066884
gene_1036	-1.89065	3.65732	0.000983136	0.00669003
gene_7947	1.81842	4.20501	0.000983804	0.00669003
gene_2860	-1.90021	7.51665	0.000990365	0.006729
gene_7925	-2.43452	1.9329	0.00099182	0.00673323
gene_771	0.834074	6.27388	0.000993057	0.00673599
gene_3976	-0.936254	8.10796	0.000995582	0.00674736
gene_4142	-1.11055	7.22406	0.000996399	0.00674736
gene_3051	3.16983	2.68956	0.00100409	0.00679372
gene_2589	-2.76262	-0.608655	0.00100606	0.00680143
gene_8133	3.42718	0.844641	0.00100691	0.00680146
gene_7234	2.02599	5.21698	0.00100968	0.00681447
gene_1816	-1.52193	3.98621	0.00101139	0.00682035
gene_377	-1.24594	7.61126	0.00101765	0.00685684
gene_4438	-1.32065	3.42285	0.00101867	0.00685806
gene_6970	-1.37848	3.56625	0.00102233	0.00687189
gene_1400	-1.26922	4.51439	0.00102243	0.00687189
gene_6384	0.855079	9.40995	0.00103324	0.00693451
gene_4291	1.53024	6.40716	0.00103346	0.00693451
gene_3040	1.34827	11.6315	0.00103483	0.00693797
gene_2507	-3.46569	4.06309	0.00104437	0.00699172
gene_1779	2.69985	2.6945	0.00104457	0.00699172
gene_5489	-0.811655	5.35846	0.00105048	0.00702549
gene_7330	-1.32236	4.95817	0.0010518	0.00702722
gene_3655	-2.74501	4.30581	0.00105248	0.00702722
gene_7459	0.816852	6.16684	0.00106308	0.00709219
gene_103	-1.25651	5.06649	0.00106903	0.00712242
gene_4392	-1.07876	6.47064	0.00106937	0.00712242
gene_402	1.88021	4.57937	0.00107207	0.00713448
gene_5742	-2.16061	4.08277	0.00108033	0.00718358
gene_3047	1.09652	8.04667	0.00108413	0.0072029
gene_5530	3.03643	7.108	0.00108585	0.00720739
gene_8326	1.51663	6.13265	0.00108658	0.00720739
gene_798	1.17833	5.99971	0.001088	0.0072109
gene_5577	-2.70112	4.45131	0.00108933	0.00721382
gene_4687	-2.44928	2.46586	0.00109112	0.00721978
gene_7563	-1.34111	5.042	0.00109204	0.00721992
gene_1515	-2.31481	4.57072	0.00109738	0.00724933
gene_34	-1.16715	5.09379	0.0010989	0.00725343
gene_4216	0.767352	7.98314	0.00110313	0.00726415
gene_2693	-1.36	8.72103	0.00110349	0.00726415
gene_6906	-4.30081	2.32181	0.00110357	0.00726415
gene_3748	-0.879012	5.88224	0.00110487	0.00726415
gene_5327	-1.19911	6.10621	0.001105	0.00726415
gene_1944	2.92264	6.00309	0.00110769	0.00727589
gene_5050	-2.06075	8.78089	0.00110904	0.00727884
gene_538	-1.73695	7.67695	0.0011105	0.00728254
gene_3849	-1.08046	10.4707	0.00111345	0.007296
gene_1398	-0.920222	5.10856	0.00111477	0.00729871
gene_5268	-1.16416	4.6856	0.00111599	0.00730081
gene_7511	0.783365	6.35595	0.00112118	0.00732839
gene_7944	-2.24371	8.32733	0.00112312	0.00732839
gene_4403	1.97147	4.08127	0.00112338	0.00732839
gene_1268	-2.10377	4.69985	0.00112383	0.00732839
gene_6117	1.16555	6.81082	0.0011252	0.00732876
gene_3312	1.00327	5.65218	0.00112569	0.00732876
gene_5277	-1.77171	3.53333	0.00112829	0.00733975
gene_6261	2.08194	2.44468	0.00112937	0.00734088
gene_8493	-1.71665	3.53416	0.00113145	0.00734854
gene_8403	-1.44246	5.51411	0.00113926	0.0073933
gene_3317	-0.847973	10.1147	0.0011456	0.00742849
gene_3381	1.45024	6.88411	0.00114784	0.00743709
gene_1650	-1.70884	8.97468	0.00115651	0.00748729
gene_2813	-1.95689	4.95798	0.00115994	0.00750345
gene_8070	-2.63411	3.30499	0.0011636	0.00752112
gene_6577	0.845006	5.97509	0.00116561	0.00752814
gene_2178	2.33876	1.58585	0.00116957	0.00754766
gene_1908	-1.53693	5.68274	0.00117185	0.00755403
gene_7070	1.56175	5.02438	0.00117281	0.00755403
gene_2767	3.36847	0.432481	0.00117413	0.00755403
gene_1395	-0.94566	6.75998	0.00117428	0.00755403
gene_2550	4.75558	6.35842	0.00118071	0.00758827
gene_5092	-1.63667	5.04727	0.00118148	0.00758827
gene_2684	-2.17266	5.58772	0.00118276	0.00759048
gene_2713	1.72305	3.40127	0.0011869	0.00761102
gene_5542	1.09199	7.33745	0.00118924	0.00761621
gene_6521	3.93858	0.346341	0.00118959	0.00761621
gene_3922	-0.839169	6.43732	0.00119247	0.00762363
gene_5865	-1.03264	5.52598	0.00119263	0.00762363
gene_5635	-1.557	5.53843	0.00121044	0.00772661
gene_5217	-1.8991	5.57729	0.00121123	0.00772661
gene_6101	0.787557	6.89277	0.00121268	0.00772661
gene_3691	2.18313	2.84878	0.00121291	0.00772661
gene_2289	-1.21288	7.08076	0.00121369	0.00772661
gene_7371	-1.98032	5.49629	0.00121447	0.00772661
gene_3575	-2.54056	3.23343	0.00121632	0.00773231
gene_2173	-2.4142	2.81836	0.00121856	0.0077405
gene_6519	2.9015	3.03089	0.00122055	0.00774348
gene_6467	1.94403	7.79243	0.00122094	0.00774348
gene_4252	2.83601	3.24051	0.00122342	0.00775309
gene_1035	-1.39068	4.83889	0.00122705	0.00776655
gene_1211	2.43137	0.0551607	0.00122746	0.00776655
gene_7368	1.03109	4.99823	0.0012293	0.00777211
gene_8055	-0.772014	5.79836	0.00123227	0.00778482
gene_8190	0.75683	6.0535	0.00123501	0.00779606
gene_3716	2.21731	3.7797	0.00123623	0.0077977
gene_973	1.36246	6.0084	0.00124098	0.00782153
gene_919	2.56923	2.88624	0.0012424	0.00782442
gene_576	2.0438	6.84745	0.00124418	0.00782957
gene_1530	-3.82568	2.3441	0.00124729	0.00784301
gene_2038	-1.18656	5.42639	0.00125245	0.00786534
gene_85	3.63628	3.62283	0.00125423	0.00786534
gene_8320	1.59343	4.7358	0.00125494	0.00786534
gene_8605	3.19561	3.82847	0.00125576	0.00786534
gene_2882	-0.766403	6.9201	0.00125647	0.00786534
gene_7750	-1.10779	4.54137	0.00125667	0.00786534
gene_8012	3.67036	1.86137	0.0012626	0.00789635
gene_240	1.87475	3.88663	0.00126682	0.00791666
gene_6616	0.973012	5.77256	0.00126956	0.00792764
gene_3811	-1.43258	4.61928	0.00127139	0.00792987
gene_7736	-1.75872	6.79584	0.00127187	0.00792987
gene_4628	1.82919	3.47848	0.00127626	0.0079511
gene_4849	1.9845	5.19371	0.001287	0.00801182
gene_6217	1.16548	7.06886	0.00128861	0.0080157
gene_3794	-1.13367	5.15305	0.00129107	0.00802483
gene_3222	0.995109	5.66891	0.00129664	0.008053
gene_3565	-1.01666	5.41727	0.00129797	0.008053
gene_6340	-1.20711	4.24558	0.00129858	0.008053
gene_703	1.24045	6.34097	0.0013026	0.00806635
gene_160	-1.53777	3.48297	0.00130406	0.00806635
gene_1412	-1.22933	3.96268	0.00130461	0.00806635
gene_6234	-1.07417	9.38236	0.00130472	0.00806635
gene_5675	-2.53217	1.11119	0.00130595	0.00806781
gene_7021	1.37529	6.1286	0.00131044	0.00808937
gene_2866	-1.51572	5.68503	0.00131325	0.00810056
gene_8372	0.864587	5.59044	0.00131454	0.00810232
gene_5949	0.986333	9.23093	0.00131989	0.00812909
gene_7205	1.0441	4.8511	0.00132345	0.00814488
gene_2736	1.0164	7.37024	0.00133007	0.00817741
gene_8462	2.65001	2.29394	0.00133121	0.00817741
gene_5324	-1.35384	6.35102	0.00133177	0.00817741
gene_86	0.711978	8.49228	0.00133283	0.00817774
gene_6523	-1.35139	4.32486	0.00133444	0.00818141
gene_6417	2.35922	4.86316	0.00133796	0.00819677
gene_6749	-2.79383	-0.156168	0.00135158	0.00827397
gene_4300	1.16519	6.49185	0.00135299	0.00827631
gene_1163	0.944853	11.3983	0.00135568	0.00828215
gene_1215	-1.51533	4.89773	0.00135671	0.00828215
gene_3532	1.04463	6.4694	0.00135701	0.00828215
gene_5997	0.957131	6.13126	0.00136116	0.00829581
gene_6033	1.40418	4.42607	0.0013613	0.00829581
gene_2417	-1.51902	8.81837	0.00136857	0.00833386
gene_6415	5.48273	2.40743	0.00137027	0.00833797
gene_8345	-2.18448	5.52498	0.00137318	0.00834941
gene_5438	1.12907	6.20445	0.00137829	0.00837102
gene_8596	-1.66381	5.22987	0.0013788	0.00837102
gene_3101	-1.01336	7.77859	0.00138105	0.00837836
gene_4131	-0.896432	6.53646	0.0013922	0.00843971
gene_7574	1.84558	3.5893	0.00139489	0.00844966
gene_4104	1.15406	5.86098	0.00139767	0.00845308
gene_7169	-1.2547	4.83223	0.00139781	0.00845308
gene_3045	-1.13429	6.36089	0.00139956	0.00845308
gene_8520	-2.38262	3.44664	0.00139963	0.00845308
gene_7669	3.55442	4.07589	0.00140666	0.0084892
gene_4971	-2.12988	7.50724	0.00141066	0.00850705
gene_1199	3.61361	5.74436	0.00141352	0.00851796
gene_5602	-1.08032	6.9086	0.00141635	0.00852605
gene_147	-1.16696	4.48074	0.00141697	0.00852605
gene_6603	-0.800035	7.98533	0.00142224	0.00854787
gene_8152	-0.972623	7.46408	0.00142347	0.00854787
gene_5789	1.51368	7.80262	0.00142377	0.00854787
gene_5575	1.13708	7.09299	0.00142651	0.00855283
gene_4349	3.93747	4.19188	0.0014267	0.00855283
gene_6714	4.37377	3.4969	0.00143218	0.00857528
gene_2322	1.16542	4.1681	0.00143257	0.00857528
gene_2267	-1.43563	4.45637	0.00143456	0.00858086
gene_8727	2.7535	0.10508	0.00144153	0.00861618
gene_1341	0.752335	8.85972	0.0014447	0.00862879
gene_3488	-1.60973	3.82588	0.00144589	0.0086295
gene_2780	-1.70116	3.49573	0.00145009	0.00864677
gene_2355	-1.02363	7.51514	0.00145092	0.00864677
gene_3768	-1.31806	5.00233	0.00145287	0.00865205
gene_5009	0.981263	6.00388	0.00145617	0.00866534
gene_7279	2.20403	2.02042	0.00146352	0.00870269
gene_4287	-2.14562	5.50035	0.00146565	0.00870415
gene_8451	-1.06181	7.16681	0.00146592	0.00870415
gene_7754	1.68626	5.74698	0.00146905	0.00871116
gene_8718	-2.09453	3.26164	0.00146925	0.00871116
gene_4794	-0.883425	10.0307	0.00147667	0.00874877
gene_2148	1.91104	4.77369	0.00147966	0.00876007
gene_4347	-2.95558	6.20487	0.00148275	0.00877194
gene_7243	1.63351	4.36654	0.00148865	0.008792
gene_7586	0.838007	8.31587	0.00148935	0.008792
gene_2345	-1.82488	4.6012	0.0014894	0.008792
gene_6414	5.44947	6.14623	0.00149729	0.00882644
gene_7097	-1.02437	5.34226	0.00149808	0.00882644
gene_6236	-0.751731	6.15089	0.0014985	0.00882644
gene_4297	-1.50905	6.6713	0.00150187	0.00883985
gene_7313	-2.91219	3.77899	0.00151017	0.00888228
gene_4364	-1.19529	6.47849	0.00151131	0.00888249
gene_4022	-1.90771	8.44649	0.0015166	0.00889392
gene_6963	1.17459	5.93706	0.00151741	0.00889392
gene_3453	1.73378	3.87166	0.00151762	0.00889392
gene_6745	1.48558	3.69472	0.00151764	0.00889392
gene_2904	-1.58283	7.44196	0.00152082	0.0089061
gene_2808	0.956871	6.44952	0.00152299	0.00891237
gene_3508	2.20158	5.02552	0.00152445	0.00891445
gene_1991	1.38264	5.32192	0.00152748	0.00892252
gene_367	0.8668	6.45105	0.00152803	0.00892252
gene_1622	0.933632	4.96352	0.00153088	0.00892948
gene_3749	1.18797	6.18034	0.00153226	0.00892948
gene_3202	-1.04523	5.67576	0.00153253	0.00892948
gene_4215	1.03254	7.49177	0.00153757	0.00895239
gene_8408	-1.15181	5.37585	0.00154354	0.00897883
gene_4682	-1.91035	4.04275	0.00154433	0.00897883
gene_8693	0.875073	7.54365	0.00154744	0.00899046
gene_7011	1.44772	6.74705	0.00155485	0.00902706
gene_7541	1.79437	6.20715	0.00155627	0.00902881
gene_3965	1.17898	8.21521	0.00156232	0.00905745
gene_178	2.77894	8.57285	0.00156718	0.00907913
gene_2423	-1.12653	6.57613	0.00156843	0.00907986
gene_4647	1.31748	8.22643	0.00157188	0.00909334
gene_276	-1.61067	4.67007	0.0015749	0.00910431
gene_1464	-1.19513	4.34172	0.00157901	0.00912155
gene_8026	4.98383	6.71325	0.00158324	0.00913948
gene_2303	-1.63966	4.62176	0.00158778	0.00915912
gene_4691	-1.58314	4.91585	0.00160303	0.00924051
gene_8201	-0.778699	6.46265	0.0016072	0.00925029
gene_7693	2.15258	5.35834	0.0016079	0.00925029
gene_4879	1.76606	5.45243	0.00160903	0.00925029
gene_6995	1.43791	5.34565	0.00160929	0.00925029
gene_6790	-2.62831	-0.670847	0.00161147	0.00925579
gene_6245	-2.14451	2.34319	0.00161253	0.00925579
gene_7428	2.50722	1.34757	0.00161533	0.00926524
gene_8068	1.20424	5.42081	0.00161852	0.00927065
gene_2801	2.39491	3.75816	0.00161913	0.00927065
gene_2083	-1.71547	4.29094	0.00162051	0.00927065
gene_6990	1.26609	4.89568	0.00162085	0.00927065
gene_4339	1.95627	5.79884	0.00162233	0.00927259
gene_1595	-1.09962	7.47071	0.0016235	0.00927274
gene_8116	-0.965545	6.36014	0.00162612	0.00928115
gene_2902	-1.19127	4.49247	0.00164483	0.00937546
gene_2863	2.96417	0.89458	0.00164496	0.00937546
gene_6436	-1.29613	4.27164	0.00165037	0.00939971
gene_6127	-1.38244	5.03314	0.00165168	0.00940051
gene_2782	1.09488	7.31679	0.00165869	0.00942956
gene_1326	0.864589	7.58726	0.00166019	0.00942956
gene_6243	-1.11897	4.21955	0.00166056	0.00942956
gene_3659	-1.42227	7.22392	0.00166144	0.00942956
gene_300	-1.62997	3.99139	0.00166688	0.00945034
gene_3554	-1.67998	5.51425	0.00166743	0.00945034
gene_6494	3.05454	4.11955	0.00167038	0.0094574
gene_3301	1.44831	5.66336	0.00167101	0.0094574
gene_8142	3.12784	6.69263	0.00167613	0.00947974
gene_5829	-1.2499	6.47662	0.00167933	0.00949122
gene_2961	-3.01147	-0.512753	0.00168367	0.00950907
gene_3348	-1.91578	6.46514	0.00169192	0.00954841
gene_1177	-1.23972	4.70346	0.00169374	0.00954841
gene_6451	-1.40006	4.23756	0.00169417	0.00954841
gene_3754	1.60664	3.91446	0.00169792	0.00956288
gene_5938	2.53492	0.729439	0.00170225	0.00958065
gene_312	-1.03661	5.80875	0.00170559	0.00959276
gene_1924	2.4985	2.88997	0.00170737	0.009593
gene_3371	1.3796	5.21608	0.00170913	0.009593
gene_6103	0.869252	6.8153	0.00170919	0.009593
gene_6688	-2.18631	1.70978	0.0017111	0.00959707
gene_4189	1.09044	9.49248	0.00171451	0.00960958
gene_4657	-1.0858	6.27717	0.00171929	0.00962971
gene_180	4.57807	5.78504	0.00172412	0.00964929
gene_4405	-1.13027	5.00671	0.00172521	0.00964929
gene_6320	-2.85164	0.779243	0.00172638	0.00964929
gene_7153	-1.75241	5.12563	0.00172815	0.00964929
gene_6877	2.56002	1.03813	0.00172875	0.00964929
gene_5868	1.29803	4.54722	0.00173576	0.00968174
gene_6659	-1.54117	2.59638	0.0017382	0.00968872
gene_8073	1.58806	7.97721	0.00174677	0.00972977
gene_200	-1.95787	3.80169	0.00174843	0.00973235
gene_7681	-1.15278	5.66864	0.00175095	0.00973355
gene_476	1.45923	8.00016	0.00175105	0.00973355
gene_3704	-1.08569	6.86841	0.00176856	0.00982415
gene_5831	1.3846	6.93204	0.00177138	0.0098268
gene_2603	1.31881	6.76529	0.00177147	0.0098268
gene_4202	4.17747	6.82235	0.00177279	0.0098274
gene_3563	-1.75052	5.12802	0.00177434	0.00982929
gene_4360	-1.86205	2.92436	0.00177643	0.00983208
gene_2621	-1.39915	4.38322	0.00177754	0.00983208
gene_4922	-1.95561	3.44221	0.00177849	0.00983208
gene_7142	-0.903875	7.56324	0.00178924	0.00988476
gene_6137	-0.986908	5.88379	0.00179944	0.00992951
gene_3618	-0.715863	5.63675	0.00179979	0.00992951
gene_4443	1.04277	4.67704	0.0018031	0.00994097
gene_95	1.79414	8.22359	0.00180469	0.00994296
gene_1096	-2.09237	5.46075	0.00180804	0.00995465
gene_315	-1.24707	6.45459	0.00181423	0.00998196
gene_7573	1.07841	5.82931	0.00181859	0.00999917
gene_2368	0.913171	5.34287	0.00182538	0.0100297
gene_3743	-1.26051	4.60384	0.00182684	0.0100309
gene_7335	-0.815648	7.64431	0.00182904	0.0100327
gene_6230	-1.2644	4.08924	0.00182964	0.0100327
gene_1983	-1.04989	4.66546	0.00183287	0.0100436
gene_1596	2.8176	1.77407	0.00183426	0.0100444
gene_6409	-1.46686	6.91979	0.00183932	0.0100653
gene_7221	-1.15772	5.58243	0.00184176	0.0100719
gene_7316	0.643147	6.42529	0.00184887	0.0101039
gene_4619	-1.43567	4.78374	0.00186061	0.0101612
gene_1117	-0.828809	7.49951	0.00186255	0.0101649
gene_5581	-1.2977	5.2066	0.00186489	0.0101709
gene_4401	-0.834033	9.42034	0.00186936	0.0101884
gene_938	-1.21412	6.12005	0.00187436	0.0102088
gene_2504	1.48922	5.8515	0.00187771	0.0102202
gene_8382	0.930932	9.01669	0.00188003	0.0102243
gene_5701	-1.5644	6.7593	0.00188224	0.0102243
gene_6586	1.65209	4.70869	0.00188226	0.0102243
gene_6310	0.800793	6.65106	0.0018926	0.0102736
gene_5747	-1.67345	4.8249	0.00191099	0.0103638
gene_8365	2.1384	3.62107	0.00191179	0.0103638
gene_7470	-1.27507	6.96445	0.00191741	0.0103874
gene_7056	-1.08279	7.45491	0.00192734	0.0104342
gene_5950	-1.17387	4.48626	0.00192938	0.0104382
gene_7307	-1.3343	4.97652	0.00194995	0.0105422
gene_4675	-2.8031	0.258992	0.00195121	0.0105422
gene_4819	-1.01665	8.12517	0.00195694	0.0105499
gene_7017	1.53126	7.31758	0.00195698	0.0105499
gene_8000	1.59305	4.44313	0.00195756	0.0105499
gene_6528	2.06843	4.76252	0.00195783	0.0105499
gene_3370	1.10413	8.24742	0.00195935	0.010551
gene_5013	-1.9015	8.54265	0.00196416	0.0105688
gene_2573	-0.950253	4.64221	0.00196526	0.0105688
gene_5280	-0.955662	4.87621	0.00198257	0.0106548
gene_8835	0.888756	5.56537	0.00198525	0.0106621
gene_2644	-1.11978	5.28679	0.00198781	0.0106688
gene_2072	-1.67241	8.14021	0.00198944	0.0106688
gene_1414	-0.876891	6.17918	0.00199045	0.0106688
gene_3763	-3.29833	4.86505	0.00199402	0.010681
gene_3403	1.62596	4.95397	0.00199627	0.0106859
gene_3917	4.00247	5.44362	0.00199876	0.0106922
gene_8506	1.29366	6.74343	0.0020011	0.0106976
gene_3079	-1.59646	8.90468	0.00200582	0.0107123
gene_3831	4.05934	1.89913	0.00200826	0.0107123
gene_688	0.892005	5.67515	0.00200964	0.0107123
gene_4896	-1.29512	4.59255	0.00201019	0.0107123
gene_5502	1.09883	7.05319	0.00201046	0.0107123
gene_5527	1.46228	3.83981	0.00201342	0.0107175
gene_3611	-0.868688	5.55665	0.00201408	0.0107175
gene_1461	-0.636483	5.91627	0.00203121	0.0108015
gene_4245	-1.32702	7.54249	0.00203361	0.0108072
gene_6216	0.908219	6.93435	0.002046	0.010866
gene_1285	4.15431	6.86624	0.0020513	0.0108791
gene_6825	-1.92543	4.05338	0.00205227	0.0108791
gene_2849	0.899091	6.32069	0.0020525	0.0108791
gene_752	1.02416	6.35803	0.00206225	0.0109236
gene_5662	-1.63739	3.76551	0.00206382	0.0109248
gene_7576	0.862163	5.49348	0.00207356	0.0109692
gene_4369	1.75144	4.50956	0.00208101	0.0109999
gene_2938	-1.30201	6.52674	0.00208209	0.0109999
gene_4538	2.43874	2.04586	0.00208563	0.0110114
gene_33	-1.78106	3.84891	0.00209689	0.0110636
gene_927	0.919613	5.87525	0.00210289	0.0110881
gene_6132	1.38922	4.06558	0.00210582	0.0110963
gene_5639	1.03737	5.78307	0.00210759	0.0110984
gene_6666	-1.21331	4.6151	0.00212168	0.0111654
gene_6855	-1.28295	3.66349	0.00212526	0.0111769
gene_597	-1.44859	4.90489	0.00212835	0.0111859
gene_7999	0.829423	8.49749	0.00212974	0.011186
gene_5943	-1.88439	2.48319	0.002134	0.0112011
gene_2160	2.04213	3.95335	0.00213652	0.011207
gene_2396	1.52342	4.50175	0.00214241	0.011225
gene_6256	-2.4846	3.15779	0.00214272	0.011225
gene_5856	2.25645	2.80727	0.00214866	0.0112489
gene_8259	1.30572	5.42551	0.00215829	0.0112848
gene_5493	-1.07348	4.12105	0.00215831	0.0112848
gene_3549	-0.83803	6.5664	0.00216238	0.0112988
gene_6541	-1.40269	7.36934	0.00216995	0.011331
gene_5944	2.42621	2.06792	0.00217692	0.0113601
gene_4181	-1.87852	4.59401	0.00217838	0.0113604
gene_4703	-1.48633	7.53346	0.00218193	0.0113716
gene_6525	-1.66352	4.81302	0.00219322	0.0114231
gene_5019	-0.775165	5.61737	0.00220227	0.0114628
gene_524	-1.13842	5.40642	0.00220439	0.0114665
gene_902	-0.785783	6.598	0.00220887	0.0114794
gene_1678	-1.67661	3.26208	0.00220971	0.0114794
gene_5272	-1.61539	4.45377	0.0022119	0.0114834
gene_944	-1.30363	6.14788	0.00222455	0.0115389
gene_14	-1.58927	4.80208	0.00222543	0.0115389
gene_2023	-2.43482	1.60166	0.00223019	0.0115562
gene_4001	-1.60236	7.61183	0.00223336	0.0115652
gene_6276	-2.36947	3.83284	0.00223938	0.0115857
gene_1608	2.69296	4.50663	0.00224018	0.0115857
gene_2304	-1.53225	6.05182	0.00224304	0.0115931
gene_6052	0.825207	5.58281	0.00224907	0.0116168
gene_8322	-3.78967	1.11006	0.00225912	0.0116458
gene_2150	0.782465	7.19867	0.00225942	0.0116458
gene_394	3.78953	2.22589	0.0022596	0.0116458
gene_6916	-0.811995	8.72427	0.00226043	0.0116458
gene_5988	3.92386	3.141	0.00226347	0.0116541
gene_7611	-1.72197	5.00819	0.00226868	0.0116734
gene_8050	-0.8744	6.06838	0.00227259	0.0116794
gene_379	-1.27152	6.85301	0.00227272	0.0116794
gene_4529	6.29321	6.48483	0.00227556	0.0116866
gene_8716	-1.60694	8.8414	0.00228513	0.0117283
gene_1584	-0.818509	8.90301	0.00228841	0.0117377
gene_4973	-1.65479	4.39492	0.00229194	0.0117483
gene_6869	-1.59079	4.40663	0.0023021	0.0117775
gene_361	-1.72036	5.24107	0.00230259	0.0117775
gene_1902	-0.783384	6.33387	0.00230376	0.0117775
gene_676	-1.6169	8.32389	0.00230804	0.0117775
gene_4044	1.87986	9.36835	0.00230808	0.0117775
gene_6113	-1.8161	3.79165	0.00230819	0.0117775
gene_5673	-1.18882	4.37745	0.0023091	0.0117775
gene_3451	-1.55799	3.56023	0.00230926	0.0117775
gene_3816	2.23693	3.1793	0.002316	0.0118045
gene_5138	-1.80926	7.42482	0.0023242	0.0118388
gene_4201	-0.846732	5.6882	0.00232887	0.0118551
gene_4052	1.56895	5.7384	0.00233159	0.0118615
gene_2503	-0.866878	6.54733	0.00233507	0.0118642
gene_4872	1.0775	5.59327	0.00233588	0.0118642
gene_841	-0.955539	6.25736	0.0023365	0.0118642
gene_2991	0.635315	7.26542	0.00234917	0.0119129
gene_6805	1.45086	7.2953	0.00234927	0.0119129
gene_4059	1.79607	6.36064	0.00235052	0.0119129
gene_6508	-1.11829	6.45452	0.00235487	0.0119275
gene_2936	0.898504	6.81591	0.00236696	0.0119813
gene_8783	-1.72683	3.63177	0.00237949	0.0120372
gene_1259	-1.40724	6.47285	0.00238444	0.0120546
gene_4484	0.920308	5.46615	0.00238991	0.0120748
gene_3190	-1.66514	9.41381	0.00239719	0.012104
gene_5921	2.04619	2.83145	0.00240191	0.0121098
gene_7446	1.11087	5.08713	0.00240219	0.0121098
gene_2835	-1.26234	9.95467	0.00240282	0.0121098
gene_8317	2.28456	3.36391	0.00240454	0.0121109
gene_3826	0.798391	6.7144	0.00241042	0.012133
gene_4337	-1.48685	4.08444	0.00241546	0.0121508
gene_4249	-1.72349	3.87297	0.00243323	0.0122326
gene_4650	-1.12513	5.23286	0.00243526	0.0122352
gene_5913	-0.9625	7.56682	0.00244473	0.0122722
gene_6619	1.35637	6.14443	0.00244827	0.0122722
gene_1471	2.48313	3.08872	0.0024484	0.0122722
gene_7449	1.21035	6.60927	0.00244994	0.0122722
gene_8558	1.18676	5.6911	0.00245021	0.0122722
gene_2071	-0.903213	5.03258	0.00245744	0.0122887
gene_7081	-3.11419	1.12118	0.00245879	0.0122887
gene_2228	-1.29427	3.69628	0.00245938	0.0122887
gene_6141	-0.869043	6.00165	0.00245955	0.0122887
gene_4824	1.45357	3.52184	0.00246237	0.0122952
gene_1714	2.03977	0.527737	0.00246675	0.0123094
gene_8800	-0.814925	5.51798	0.00246956	0.0123159
gene_4110	2.2397	3.42598	0.00247901	0.0123554
gene_8405	1.04181	5.12028	0.00248242	0.0123648
gene_1561	-1.40324	4.88595	0.00249051	0.0123974
gene_4230	1.48372	4.23777	0.00250145	0.0124394
gene_7304	0.74293	7.0598	0.00250495	0.0124394
gene_3332	-0.697766	6.07711	0.00250503	0.0124394
gene_1454	0.643506	6.43553	0.00250509	0.0124394
gene_2914	-1.62034	4.6404	0.00250963	0.0124543
gene_5144	0.950528	6.56876	0.00251774	0.0124869
gene_196	5.34251	4.67561	0.00252274	0.0124923
gene_1760	0.752169	6.75648	0.00252467	0.0124923
gene_5541	1.37261	3.96541	0.00252467	0.0124923
gene_663	0.831615	7.28109	0.00252498	0.0124923
gene_3581	-1.29239	6.96555	0.00252788	0.0124989
gene_1480	-1.46401	6.1575	0.00254063	0.0125543
gene_1953	-0.861066	5.34361	0.00254891	0.0125876
gene_7230	6.06365	5.76119	0.00256007	0.012635
gene_125	-0.869228	4.48143	0.00257565	0.0126992
gene_1284	1.49845	3.88847	0.00257622	0.0126992
gene_557	2.20302	3.29185	0.00259542	0.0127861
gene_6581	0.853799	5.74038	0.00259815	0.0127918
gene_2249	-1.00147	4.24314	0.00260525	0.0128189
gene_6025	2.84232	-0.104505	0.00262012	0.0128842
gene_7864	0.921337	6.49045	0.00263142	0.0129269
gene_2217	-2.24886	2.89333	0.00263199	0.0129269
gene_115	-0.869261	4.77819	0.00263529	0.0129303
gene_7192	-1.22678	7.37766	0.00263587	0.0129303
gene_677	-0.770102	6.94178	0.00263769	0.0129314
gene_4855	-0.999364	6.50994	0.00264282	0.0129487
gene_7572	-0.831465	4.6341	0.00264683	0.0129605
gene_7932	2.31693	2.09811	0.00265306	0.0129798
gene_7441	-0.959216	4.55622	0.00265398	0.0129798
gene_2051	0.977954	6.50449	0.00266005	0.0129976
gene_378	0.898762	6.18756	0.00266082	0.0129976
gene_2014	1.70585	7.90857	0.00266389	0.0130047
gene_4109	-1.13314	5.58997	0.00266759	0.0130149
gene_3318	0.745003	7.81011	0.00268014	0.0130683
gene_4276	1.45041	3.4277	0.00268234	0.0130701
gene_1821	1.19967	4.72554	0.00268373	0.0130701
gene_3239	1.10896	4.5827	0.00269324	0.0131085
gene_5648	-0.798812	5.56727	0.00269941	0.0131307
gene_7853	-2.02864	7.00578	0.00271132	0.0131807
gene_3588	-1.99909	4.18534	0.00271421	0.0131868
gene_6912	1.87887	7.11485	0.00272695	0.0132369
gene_1442	1.40428	5.55735	0.00272919	0.0132369
gene_7918	-0.828647	5.55825	0.00272943	0.0132369
gene_6317	1.07546	7.72886	0.00273793	0.0132702
gene_5060	-1.53203	5.7374	0.00274468	0.013295
gene_8856	0.995372	5.67343	0.00274794	0.0133028
gene_7956	3.77604	4.87118	0.00275524	0.0133302
gene_3718	3.44773	0.971756	0.00276113	0.0133452
gene_8513	1.98431	5.59168	0.00276165	0.0133452
gene_3394	3.70589	0.636721	0.00277226	0.0133885
gene_6180	-2.49148	4.03235	0.00278236	0.0134228
gene_977	-1.4105	8.68865	0.00278283	0.0134228
gene_1879	0.886519	8.19738	0.00279051	0.0134228
gene_4375	-1.77251	4.26501	0.00279126	0.0134228
gene_5249	2.55549	5.07943	0.00279138	0.0134228
gene_971	-1.04103	5.52346	0.00279273	0.0134228
gene_1912	-1.91531	2.45475	0.0027939	0.0134228
gene_7352	1.11405	4.25823	0.00279409	0.0134228
gene_707	2.03742	3.51118	0.00279604	0.0134228
gene_1682	1.57661	3.67405	0.00279632	0.0134228
gene_7166	-1.20842	4.33243	0.0027976	0.0134228
gene_7936	1.21183	4.62776	0.00280863	0.0134678
gene_4635	-0.95567	4.93778	0.00281295	0.0134805
gene_3620	-1.59673	8.56397	0.0028169	0.0134915
gene_2318	-1.70482	4.87604	0.00282291	0.0135122
gene_6229	-1.18488	4.21293	0.00282659	0.0135181
gene_4901	-3.5589	4.32456	0.0028291	0.0135181
gene_8459	-1.11558	4.79166	0.00283122	0.0135181
gene_4338	-1.37877	4.47692	0.00283228	0.0135181
gene_491	-0.779746	6.83731	0.00283289	0.0135181
gene_1539	1.02304	7.3783	0.00283414	0.0135181
gene_8844	1.96122	4.06321	0.00284298	0.0135492
gene_5529	-0.789663	6.33055	0.00284544	0.0135492
gene_8099	-1.79159	3.41666	0.00284668	0.0135492
gene_4992	-1.91269	6.02226	0.00284735	0.0135492
gene_5149	0.920242	5.52806	0.00285434	0.0135745
gene_2519	-1.97171	9.34173	0.00285803	0.0135813
gene_8683	1.14163	11.6388	0.00285914	0.0135813
gene_8660	-2.54463	1.55443	0.00287179	0.0136334
gene_7673	2.91163	0.62042	0.00287538	0.0136421
gene_5197	-1.35636	4.47815	0.00287699	0.0136421
gene_7509	-0.691926	7.51586	0.00288825	0.0136815
gene_1798	-1.74367	3.35193	0.00288966	0.0136815
gene_4519	-1.1052	4.35971	0.00289036	0.0136815
gene_6446	5.06989	7.7217	0.00290609	0.0137479
gene_3720	-0.875218	4.817	0.00291015	0.0137591
gene_4843	-0.997293	5.77463	0.00291362	0.0137675
gene_6252	0.984099	4.89005	0.00292416	0.0138092
gene_7489	-2.37479	7.03074	0.00292972	0.0138221
gene_3379	-1.06037	9.89591	0.00293031	0.0138221
gene_4816	-1.82765	9.38954	0.00293204	0.0138223
gene_3521	-1.36612	8.36463	0.00293877	0.0138459
gene_692	-2.01289	9.46959	0.00294594	0.0138716
gene_6347	-1.33791	4.47233	0.00295145	0.0138895
gene_7828	1.82572	4.84733	0.00295925	0.0139179
gene_7670	1.94825	6.30386	0.00296093	0.0139179
gene_106	-1.48025	6.61864	0.00296598	0.0139336
gene_2832	-2.207	3.79871	0.00298223	0.0140018
gene_8824	1.28781	4.00528	0.00299542	0.0140512
gene_2391	-1.16848	5.90008	0.00299623	0.0140512
gene_7957	2.17375	3.01138	0.00300271	0.0140735
gene_3032	-2.03701	8.91639	0.00300681	0.0140845
gene_4938	-1.7057	5.43986	0.00301078	0.014095
gene_1573	-0.895855	5.30472	0.00301308	0.0140976
gene_8375	-1.41857	4.70198	0.00301985	0.0141211
gene_8	-3.28656	0.416413	0.00302512	0.0141376
gene_1711	-1.53085	8.81878	0.00303016	0.0141442
gene_1699	4.78169	1.36301	0.00303142	0.0141442
gene_7064	1.25258	8.72	0.0030348	0.0141442
gene_1701	-1.49698	5.38584	0.00303539	0.0141442
gene_3719	2.39799	2.45461	0.00303609	0.0141442
gene_1630	0.859056	8.4185	0.00303701	0.0141442
gene_3478	3.34263	5.34105	0.00304249	0.0141616
gene_4752	-1.10347	4.49731	0.00304732	0.0141734
gene_2925	2.39035	2.6285	0.00304854	0.0141734
gene_5896	0.636978	7.26768	0.00306739	0.0142529
gene_6931	0.941768	5.02056	0.0030728	0.0142698
gene_7239	-1.01618	5.79877	0.00307547	0.0142741
gene_4478	-0.67767	7.0754	0.00307876	0.0142812
gene_6808	-2.71881	-0.1208	0.00309015	0.0143258
gene_4293	-1.09921	4.38024	0.00309368	0.0143339
gene_8668	1.15027	7.21789	0.0030983	0.0143472
gene_5090	1.27981	3.81805	0.00312015	0.0144213
gene_8243	0.736716	7.02795	0.00312155	0.0144213
gene_2609	1.31192	4.34819	0.00312237	0.0144213
gene_5160	0.746713	7.13054	0.00312267	0.0144213
gene_1819	-2.93777	2.46238	0.00312426	0.0144213
gene_7341	-1.51632	9.29508	0.00312619	0.0144213
gene_1012	-0.959428	5.1197	0.00312678	0.0144213
gene_541	-2.10889	3.67614	0.00313006	0.0144282
gene_1616	-0.897643	6.45721	0.0031465	0.0144957
gene_1481	1.02928	8.0916	0.00315091	0.0145078
gene_2286	-2.25361	3.65327	0.0031615	0.0145483
gene_684	-0.886237	7.99943	0.00317316	0.0145936
gene_7652	-0.976392	5.30069	0.00318792	0.0146532
gene_2606	2.53884	1.66154	0.00319202	0.0146637
gene_7508	-0.890717	5.43462	0.00320948	0.0147356
gene_8339	1.44717	5.49033	0.003217	0.0147617
gene_5453	1.44657	6.09196	0.00322185	0.0147756
gene_1019	-1.37702	8.07862	0.00323244	0.014808
gene_233	-0.94999	6.78306	0.00323256	0.014808
gene_171	1.10454	5.55512	0.00324225	0.014837
gene_5466	3.0359	2.97711	0.00324256	0.014837
gene_662	1.15513	6.19508	0.00324908	0.014855
gene_4425	0.971907	9.09233	0.00325192	0.014855
gene_4086	-0.988473	5.37898	0.00325199	0.014855
gene_7361	-1.0561	5.54779	0.00325624	0.014866
gene_6462	-1.45426	3.95515	0.00325838	0.0148674
gene_6944	-2.97962	2.05846	0.00327489	0.0149343
gene_3920	2.97722	4.01515	0.00327814	0.0149407
gene_2766	1.09415	7.38395	0.00328248	0.0149521
gene_2069	1.40863	5.33647	0.00329772	0.0150131
gene_2616	2.26744	3.18612	0.00330751	0.0150492
gene_5961	-1.84363	5.23431	0.00331251	0.0150635
gene_2135	2.18694	5.35291	0.0033297	0.0151331
gene_1945	0.761638	7.528	0.00336257	0.015274
gene_1469	-1.65626	6.70601	0.00337055	0.0152896
gene_6015	-0.767076	5.91571	0.00337086	0.0152896
gene_4785	-2.54488	4.13261	0.00337326	0.0152896
gene_478	-2.37578	5.95177	0.00337357	0.0152896
gene_2608	1.7955	2.53605	0.00338347	0.0153259
gene_4766	-1.48342	4.0134	0.00338872	0.0153354
gene_5145	1.45421	4.70098	0.00338934	0.0153354
gene_39	-2.56411	2.31292	0.00340908	0.0154161
gene_2126	0.879785	6.87671	0.00341249	0.0154228
gene_7885	0.862285	7.06493	0.0034273	0.0154749
gene_6806	2.59076	1.4579	0.00342782	0.0154749
gene_4694	-2.66181	3.10273	0.00343137	0.0154823
gene_908	-0.973599	5.70451	0.00345533	0.0155817
gene_7862	2.01325	3.57659	0.00346646	0.0156232
gene_6389	0.77588	7.24984	0.00349685	0.0157514
gene_4670	-0.930898	4.47468	0.00350234	0.0157601
gene_829	0.628785	6.65853	0.00350268	0.0157601
gene_5470	0.725451	6.37678	0.0035066	0.015769
gene_2978	-0.830083	5.57941	0.00351596	0.0158021
gene_1193	1.74371	3.46919	0.00351787	0.0158021
gene_73	1.90796	2.05039	0.00353261	0.0158595
gene_216	2.98151	5.10404	0.00354648	0.0159121
gene_1940	-0.745471	4.86693	0.00354825	0.0159121
gene_408	0.937926	5.34095	0.00355542	0.0159354
gene_1533	-0.733673	7.43343	0.00356132	0.015953
gene_1502	-1.16017	3.88143	0.00356837	0.0159758
gene_5667	-0.873539	5.19399	0.00358222	0.016029
gene_7538	-2.07655	6.31431	0.00359854	0.0160815
gene_2531	-1.64915	3.46916	0.00359935	0.0160815
gene_7553	-0.805673	8.59287	0.00359992	0.0160815
gene_8442	-0.669707	5.91327	0.00360278	0.0160854
gene_4040	-1.73486	3.64319	0.00360722	0.0160964
gene_426	-2.19788	4.33793	0.00362651	0.0161735
gene_1805	-0.71592	6.38032	0.00364195	0.0162335
gene_4302	0.616222	5.89177	0.00365105	0.016265
gene_4902	0.875636	5.13206	0.00365616	0.0162789
gene_5603	-1.20493	4.0796	0.00366349	0.016294
gene_937	-1.12282	6.32659	0.00366457	0.016294
gene_3526	-0.639611	6.44369	0.00366671	0.016294
gene_8016	-1.00059	6.81431	0.00366762	0.016294
gene_5604	-0.978315	5.07491	0.00367319	0.016309
gene_518	0.890361	6.25514	0.00367505	0.016309
gene_5492	-0.93115	5.72945	0.00367702	0.016309
gene_2292	1.39834	3.8593	0.0036839	0.0163306
gene_769	1.02177	5.36128	0.00369096	0.0163529
gene_2235	-2.05234	4.83936	0.00369325	0.0163541
gene_437	-2.36584	2.94263	0.0036993	0.0163719
gene_5214	1.27474	4.60355	0.00371164	0.0164125
gene_2855	4.16255	3.82695	0.00371344	0.0164125
gene_5540	4.42901	4.43726	0.00371454	0.0164125
gene_8541	0.833017	6.41505	0.00372314	0.0164415
gene_8815	0.838216	7.9695	0.0037492	0.0165476
gene_6294	0.905359	4.81283	0.00375797	0.0165772
gene_5420	-1.85286	9.87764	0.00377853	0.0166588
gene_5630	-3.19771	1.68045	0.0037913	0.0167061
gene_6326	2.0415	2.70823	0.00380252	0.0167464
gene_7709	3.92861	4.79426	0.00381918	0.0168106
gene_8529	-0.75134	7.42389	0.003823	0.0168183
gene_4655	-1.53169	3.68368	0.00383375	0.0168564
gene_5513	-1.47308	6.16224	0.00384321	0.0168888
gene_1458	1.93224	5.37692	0.00385467	0.01693
gene_4640	1.7527	4.06162	0.00386703	0.0169628
gene_2316	-1.56952	4.40864	0.0038685	0.0169628
gene_577	0.911005	4.42861	0.00386899	0.0169628
gene_7908	-0.878555	8.32438	0.00387162	0.0169628
gene_190	-1.7676	4.08429	0.00387261	0.0169628
gene_8321	1.85093	2.46435	0.00387569	0.0169671
gene_7873	-1.24362	4.16678	0.00388044	0.0169714
gene_8486	-2.33832	4.04645	0.00388114	0.0169714
gene_2288	1.42404	5.51095	0.00388471	0.0169714
gene_3294	4.96061	7.43265	0.00388743	0.0169714
gene_5989	1.99849	2.91877	0.00388797	0.0169714
gene_7540	-0.903652	7.11127	0.00389032	0.0169714
gene_739	1.46678	5.75993	0.00389134	0.0169714
gene_7643	-0.648727	7.00133	0.00390211	0.0169975
gene_23	1.94971	3.74847	0.00390222	0.0169975
gene_6717	-1.25297	8.86447	0.0039036	0.0169975
gene_2574	0.995244	5.56867	0.00390823	0.0170046
gene_339	0.728828	7.83166	0.00390944	0.0170046
gene_6670	1.03703	4.99799	0.00392023	0.0170316
gene_2629	-1.11487	6.04629	0.00392191	0.0170316
gene_5649	1.24445	7.16648	0.00392196	0.0170316
gene_4697	-1.12472	4.79769	0.00394446	0.0171201
gene_8090	-1.26431	5.33376	0.00395013	0.017131
gene_1935	1.67947	4.96671	0.00395119	0.017131
gene_6835	-2.62591	0.799386	0.00395347	0.0171317
gene_1008	0.647935	7.03818	0.00396812	0.017186
gene_7462	-0.730782	5.81534	0.00397559	0.0172091
gene_3026	-0.72039	6.15971	0.00402272	0.0174039
gene_3489	-0.891832	4.77625	0.00403359	0.0174276
gene_6509	2.14467	1.42031	0.0040336	0.0174276
gene_2441	-0.84066	7.31059	0.00403466	0.0174276
gene_3522	-1.61747	5.40718	0.00404312	0.0174548
gene_8641	0.734247	7.55387	0.00405971	0.0175171
gene_6997	-1.11385	5.46375	0.00406328	0.0175231
gene_4621	1.80378	6.08337	0.0040686	0.0175368
gene_3857	0.619737	6.19987	0.00407149	0.0175399
gene_323	-1.5966	7.92954	0.00408128	0.017564
gene_5333	-1.63838	2.46634	0.00408322	0.017564
gene_2172	1.82759	5.1023	0.00408581	0.017564
gene_8087	-0.956422	5.09542	0.00408715	0.017564
gene_6951	1.21084	5.7481	0.00408854	0.017564
gene_4228	0.931212	7.54873	0.00409009	0.017564
gene_2982	-1.12407	6.75909	0.00410099	0.0176014
gene_5536	-0.986985	4.9271	0.0041065	0.0176136
gene_5958	-0.881691	8.02099	0.00410817	0.0176136
gene_1473	1.33446	4.67742	0.00411246	0.0176227
gene_1201	1.40294	8.96073	0.0041262	0.0176722
gene_197	3.79379	4.90414	0.00415025	0.0177658
gene_7650	0.69865	6.77485	0.00416051	0.0177931
gene_2121	2.4156	3.58127	0.00416101	0.0177931
gene_3081	0.751113	7.19013	0.00416729	0.0178105
gene_7969	1.38251	3.89394	0.0041739	0.0178265
gene_2789	-2.70393	4.52253	0.00417543	0.0178265
gene_8861	-0.743172	4.75848	0.00417994	0.0178363
gene_1184	1.44383	4.23571	0.00418606	0.0178508
gene_3919	5.21842	4.67181	0.00418775	0.0178508
gene_4663	-1.58312	9.17167	0.00419099	0.0178527
gene_3359	-1.85119	2.61307	0.0041926	0.0178527
gene_3411	1.41496	4.74979	0.00420055	0.0178772
gene_8807	2.66273	4.05769	0.00420826	0.0179006
gene_3500	1.12054	8.21486	0.0042189	0.01793
gene_3776	-0.720898	5.14787	0.00422029	0.01793
gene_6301	0.762985	7.15526	0.00422181	0.01793
gene_8581	-2.48518	1.09384	0.00422715	0.0179399
gene_1350	-1.51282	5.01354	0.00422859	0.0179399
gene_5085	-2.15646	3.84067	0.00425651	0.018049
gene_5227	1.22398	3.71795	0.00429013	0.0181802
gene_7069	-0.733977	5.84464	0.00429418	0.0181802
gene_931	-0.790073	6.19364	0.0042942	0.0181802
gene_812	1.38806	7.49291	0.00429783	0.0181861
gene_5757	-1.61196	6.1092	0.00432095	0.0182744
gene_6237	-1.037	6.39718	0.00434604	0.0183709
gene_5556	1.48228	5.01248	0.00435501	0.0183966
gene_7501	-2.52408	1.0296	0.00435668	0.0183966
gene_2979	-1.9418	2.29663	0.00436563	0.0184248
gene_326	-0.710198	6.51229	0.0043762	0.0184593
gene_802	-0.930674	5.47545	0.00437836	0.0184593
gene_4070	-2.23884	1.90226	0.00438505	0.0184779
gene_5040	1.46663	4.59328	0.00439372	0.0185048
gene_4516	-1.84193	2.12297	0.00439797	0.0185131
gene_4244	-0.953032	5.17986	0.00440479	0.0185322
gene_2846	-1.2411	5.16747	0.00441116	0.0185493
gene_335	-1.12524	5.49436	0.00441786	0.0185678
gene_5744	-0.969002	5.50364	0.00443114	0.018614
gene_2302	0.884206	6.00296	0.00444472	0.0186614
gene_4937	0.998445	6.81542	0.00445045	0.0186758
gene_2703	1.09043	6.29536	0.00445809	0.0186981
gene_6061	1.18915	5.69633	0.00446831	0.0187313
gene_442	-0.676718	6.18332	0.0044729	0.0187408
gene_2435	0.66437	6.25906	0.00451149	0.0188927
gene_5758	0.98798	9.94965	0.00452125	0.0189238
gene_1282	1.94941	5.39061	0.0045435	0.0190043
gene_3344	-1.67047	6.57579	0.00454516	0.0190043
gene_8551	1.29106	7.22174	0.00454755	0.0190045
gene_3497	-0.7047	6.50762	0.00455544	0.0190276
gene_6861	0.905881	5.02787	0.00456342	0.0190511
gene_7118	0.845208	8.34711	0.00457305	0.0190815
gene_4004	-2.67846	0.998389	0.00458533	0.0191191
gene_4074	1.60039	4.99626	0.00458679	0.0191191
gene_7045	-0.643055	5.36926	0.00459119	0.0191276
gene_5098	1.50426	4.60531	0.00460199	0.0191627
gene_8185	-1.63403	2.31699	0.00461884	0.019223
gene_7808	-0.996595	4.17487	0.00462252	0.0192285
gene_1434	0.806541	5.86834	0.00464241	0.0193013
gene_7010	4.12834	3.67351	0.00464551	0.0193043
gene_3698	-3.47781	2.07335	0.00465746	0.019337
gene_8349	-2.227	3.08253	0.00465817	0.019337
gene_8806	-1.13673	4.92484	0.00466583	0.0193589
gene_3883	-1.78931	9.85187	0.00471121	0.0195372
gene_8383	-1.46307	5.15527	0.00472452	0.0195776
gene_4422	3.37986	0.610012	0.00472774	0.0195776
gene_701	-1.66746	3.71648	0.00473045	0.0195776
gene_979	-1.17345	3.02662	0.0047348	0.0195776
gene_6259	-1.10443	6.52128	0.00473603	0.0195776
gene_6923	-1.13168	3.77646	0.00473645	0.0195776
gene_1565	1.58975	2.91945	0.00473972	0.0195776
gene_1361	0.876054	4.47841	0.0047403	0.0195776
gene_5422	-1.65168	8.73333	0.00475056	0.01961
gene_5874	0.802758	7.08256	0.00475322	0.0196109
gene_6967	-0.727627	6.71385	0.00479219	0.0197617
gene_7906	-1.01308	6.5498	0.00479806	0.0197758
gene_4238	0.7991	6.26141	0.00480545	0.0197896
gene_7068	-0.749897	5.36711	0.00480629	0.0197896
gene_275	-2.53334	3.71685	0.00481492	0.0198129
gene_3819	7.17862	4.02885	0.00481684	0.0198129
gene_3820	3.99038	2.27034	0.00484343	0.0199122
gene_988	-1.77622	2.64886	0.00485629	0.0199549
gene_2031	-0.68338	5.76655	0.00486234	0.0199696
gene_1443	-1.12613	6.1316	0.00486567	0.0199696
gene_6860	3.69399	5.38597	0.00486924	0.0199696
gene_1011	0.983679	5.54007	0.00487142	0.0199696
gene_2454	-2.04079	8.54128	0.0048722	0.0199696
gene_2842	-1.25151	3.98122	0.00489336	0.0200244
gene_8343	1.3198	6.1775	0.00489549	0.0200244
gene_1392	-2.37662	3.62339	0.0048955	0.0200244
gene_793	-3.11819	1.73781	0.00489709	0.0200244
gene_743	1.38858	3.99478	0.00489793	0.0200244
gene_2246	1.522	7.72709	0.00491602	0.0200882
gene_5531	-1.7255	2.50617	0.00492761	0.0201158
gene_6316	-1.47096	4.63221	0.00492896	0.0201158
gene_179	-1.39008	3.67752	0.00493021	0.0201158
gene_1638	-1.33939	4.54368	0.00493534	0.0201228
gene_6286	0.967696	4.40508	0.0049389	0.0201228
gene_123	1.24647	6.46591	0.0049394	0.0201228
gene_1439	0.931391	4.98191	0.00494281	0.0201266
gene_2211	-2.1855	8.86103	0.00498327	0.0202811
gene_69	1.00228	5.40583	0.00498688	0.0202838
gene_8044	0.969964	5.83378	0.00498894	0.0202838
gene_1738	1.19742	5.60362	0.00499451	0.0202963
gene_329	1.67144	2.6959	0.00500727	0.0203347
gene_5728	-3.00105	0.911411	0.00500898	0.0203347
gene_7347	2.59686	-0.335134	0.00501351	0.0203348
gene_6425	-0.97311	5.58005	0.00501404	0.0203348
gene_6265	-0.863445	4.74336	0.00502242	0.0203587
gene_1801	-1.28564	5.43664	0.00502911	0.0203756
[truncated: 6,100 more rows]

## Sheet: Xylose vs no sugar
Gene	logFC	AveExpr	P.Value	adj.P.Val
gene_3255	3.92209	13.1758	2.9524e-07	0.00239115
gene_2418	-2.43854	5.52882	8.7794e-07	0.00355522
gene_489	-2.21747	5.42371	2.64877e-06	0.00637114
gene_2419	-2.96097	7.09419	3.3961e-06	0.00637114
gene_4673	2.07301	7.21292	3.93329e-06	0.00637114
gene_8140	-2.57472	5.612	5.81718e-06	0.00785223
gene_8453	1.78538	8.07934	7.69263e-06	0.00806735
gene_4029	1.91222	8.63993	8.33219e-06	0.00806735
gene_8370	2.07299	7.5847	9.87424e-06	0.00806735
gene_6516	-2.56054	7.57687	1.04904e-05	0.00806735
gene_7693	-2.52433	5.35834	1.11316e-05	0.00806735
gene_8558	-1.79473	5.6911	1.19531e-05	0.00806735
gene_4101	1.49133	8.9429	1.49158e-05	0.00899748
gene_2415	-3.11532	9.1378	1.55531e-05	0.00899748
gene_2092	1.39763	7.57868	2.3497e-05	0.0126868
gene_5524	1.24837	5.44916	2.50909e-05	0.0127007
gene_5439	-1.3368	7.73572	2.84521e-05	0.0134653
gene_8566	-1.69465	4.02023	2.99266e-05	0.0134653
gene_4941	-3.00932	7.19497	3.86898e-05	0.016492
gene_8123	-2.61603	3.45345	4.72798e-05	0.0191459
gene_644	1.58852	12.4684	5.36526e-05	0.0195946
gene_6605	1.39536	9.13347	5.57783e-05	0.0195946
gene_2468	-1.66852	3.93581	5.65441e-05	0.0195946
gene_3889	3.85673	5.78808	5.80653e-05	0.0195946
gene_7662	1.10996	5.70434	7.29057e-05	0.0217913
gene_6960	1.70784	5.03234	7.63436e-05	0.0217913
gene_6755	1.20466	5.88294	7.72435e-05	0.0217913
gene_5441	-4.11246	9.3323	7.72942e-05	0.0217913
gene_4792	1.33012	9.41524	7.8028e-05	0.0217913
gene_959	1.65339	9.64063	8.94374e-05	0.0233857
gene_288	-1.27163	5.47238	8.96454e-05	0.0233857
gene_8488	1.06454	9.86145	9.23992e-05	0.0233857
gene_8281	-2.24984	6.49751	0.000115272	0.0282906
gene_4302	0.941923	5.89177	0.000121085	0.0288432
gene_7823	-1.27931	8.24447	0.000135966	0.0305924
gene_4771	-1.66179	4.9357	0.000136813	0.0305924
gene_5587	1.22807	8.39449	0.000147861	0.0305924
gene_8367	3.6168	5.81738	0.000148073	0.0305924
gene_3599	-2.45874	7.20212	0.000152803	0.0305924
gene_5471	-1.26824	5.27149	0.00015668	0.0305924
gene_7388	1.91107	7.59591	0.000162446	0.0305924
gene_8740	1.82191	6.35877	0.000162853	0.0305924
gene_6559	-3.96342	3.89708	0.000163866	0.0305924
gene_6904	1.75059	11.561	0.000166202	0.0305924
gene_8060	-0.991203	6.02859	0.000181507	0.0318166
gene_7791	-1.02224	7.31227	0.000184846	0.0318166
gene_4937	1.4769	6.81542	0.000189573	0.0318166
gene_6969	1.26912	10.764	0.000193234	0.0318166
gene_3256	2.58737	13.7969	0.000193373	0.0318166
gene_8378	-1.58027	6.42972	0.000196423	0.0318166
gene_3614	1.15505	5.63988	0.000210549	0.0331767
gene_7440	-2.00338	7.34121	0.000213012	0.0331767
gene_3570	1.57396	9.15396	0.000223537	0.0336508
gene_2555	-1.47772	4.94773	0.000226134	0.0336508
gene_6528	-1.79685	4.76252	0.00023265	0.0336508
gene_2343	-2.46109	5.69368	0.000232676	0.0336508
gene_4680	-1.2455	6.68341	0.000242021	0.0343882
gene_2485	2.98722	10.179	0.000252371	0.0352406
gene_2028	-1.43292	4.85263	0.000271359	0.0361406
gene_168	-1.05873	9.119	0.000272503	0.0361406
gene_5056	-2.9153	7.65339	0.000273332	0.0361406
gene_4223	1.2958	5.34503	0.000276666	0.0361406
gene_8637	-4.15403	3.80326	0.000293799	0.0377256
gene_5000	1.99157	7.7704	0.000298608	0.0377256
gene_4089	-1.26053	6.10008	0.000302774	0.0377256
gene_8636	-5.26685	2.14648	0.000312627	0.0383632
gene_1313	4.46547	9.53023	0.000319756	0.0386524
gene_6225	-3.66326	0.422073	0.000335198	0.0393467
gene_3479	-2.37057	5.95581	0.000335217	0.0393467
gene_3919	-3.15908	4.67181	0.000352318	0.0396683
gene_4043	-2.21476	4.82442	0.000352325	0.0396683
gene_7009	-2.12385	2.35801	0.000354546	0.0396683
gene_1915	-4.95196	5.66589	0.000357549	0.0396683
gene_1785	2.97701	2.45198	0.000364087	0.0398478
gene_286	1.25022	6.02912	0.000379613	0.0409931
gene_8047	2.36967	12.0345	0.00041403	0.0441214
gene_8635	-5.59774	0.333394	0.000430947	0.0446724
gene_5102	-1.79638	5.01824	0.000435077	0.0446724
gene_685	-1.13398	6.38314	0.000435748	0.0446724
gene_5948	-1.10913	5.87923	0.000451908	0.0457501
gene_1059	-0.923157	4.93838	0.000476901	0.0476842
gene_2487	1.9305	6.8965	0.00048947	0.0483441
gene_3221	1.27924	7.00257	0.000497644	0.0485592
gene_7666	1.54635	5.89903	0.000527478	0.0504339
gene_2180	-2.41871	5.74775	0.00052931	0.0504339
gene_7366	-0.937825	6.29997	0.000613544	0.0577801
gene_244	-1.0756	6.51025	0.000623703	0.0580617
gene_848	1.82525	6.52192	0.000631052	0.0580783
gene_5442	-1.70701	5.78343	0.000652421	0.0593703
gene_4472	1.18775	6.24737	0.000677423	0.0602763
gene_8813	1.69427	4.69001	0.000678122	0.0602763
gene_3936	-1.5452	4.20978	0.000684704	0.0602763
gene_924	0.790064	7.28116	0.000692249	0.0602852
gene_3237	0.88856	7.72478	0.000705491	0.0607382
gene_7260	0.910411	6.38328	0.000712449	0.0607382
gene_6949	-0.856318	5.80435	0.000729305	0.0615275
gene_2659	0.925278	7.44509	0.000752294	0.0622788
gene_5730	-1.09218	4.85644	0.000753589	0.0622788
gene_8334	1.10132	6.46267	0.0007713	0.0624301
gene_8355	-1.11509	6.73297	0.000772254	0.0624301
gene_2091	1.61933	5.24023	0.000778546	0.0624301
gene_7295	-1.41739	6.52319	0.000787838	0.0625189
gene_6305	-0.78313	7.85879	0.000795092	0.0625189
gene_6534	-2.05859	2.52317	0.000863922	0.0672779
gene_5672	0.774663	7.22837	0.000875588	0.067537
gene_7714	-1.15252	5.24717	0.000902211	0.0687484
gene_5131	-1.77173	3.59444	0.000918404	0.0687484
gene_8116	-1.03001	6.36014	0.000923461	0.0687484
gene_4606	1.06658	6.6219	0.000929829	0.0687484
gene_1343	-1.35446	3.63263	0.000933735	0.0687484
gene_1676	0.868026	6.68977	0.000990503	0.0698764
gene_621	-1.39693	4.20749	0.000997338	0.0698764
gene_5872	-2.03857	7.65116	0.000998274	0.0698764
gene_751	-0.953456	4.99399	0.000999821	0.0698764
gene_4768	1.90058	9.82762	0.00100132	0.0698764
gene_6467	-2.10675	7.79243	0.00100286	0.0698764
gene_5988	-2.25059	3.141	0.00102853	0.0698764
gene_3738	0.936816	8.17608	0.00104562	0.0698764
gene_7710	-0.986353	6.45028	0.00104614	0.0698764
gene_1133	-0.89521	5.55219	0.00106126	0.0698764
gene_3920	-2.00942	4.01515	0.00106521	0.0698764
gene_4693	1.84478	5.36305	0.00108912	0.0698764
gene_2571	-1.07749	4.36842	0.00110453	0.0698764
gene_3034	1.107	5.43893	0.00110592	0.0698764
gene_55	-1.18799	7.06607	0.00111907	0.0698764
gene_5886	0.753496	7.22963	0.00112635	0.0698764
gene_5809	-0.806783	5.98567	0.0011408	0.0698764
gene_1863	3.27321	4.02933	0.00114154	0.0698764
gene_5124	0.941163	8.04884	0.00115714	0.0698764
gene_1727	-1.15323	6.97961	0.00115986	0.0698764
gene_370	1.40414	5.72411	0.00116275	0.0698764
gene_7050	1.67686	13.179	0.00116376	0.0698764
gene_5938	2.73862	0.729439	0.00116801	0.0698764
gene_7128	-1.42075	3.84538	0.0011688	0.0698764
gene_8014	2.67456	9.41811	0.00117741	0.0698764
gene_6927	0.95652	4.71146	0.00118139	0.0698764
gene_1553	-0.885276	5.91093	0.00118201	0.0698764
gene_8318	-1.07308	4.85275	0.00122942	0.071417
gene_6464	-1.73703	2.64621	0.00123327	0.071417
gene_7140	1.28038	6.41707	0.00123452	0.071417
gene_8351	1.33755	6.53595	0.00124881	0.071481
gene_3399	1.74629	3.85398	0.00126248	0.071481
gene_3656	0.989642	9.01316	0.00126933	0.071481
gene_2711	0.883618	6.60881	0.00127093	0.071481
gene_4336	-2.55102	1.38394	0.00133707	0.0740978
gene_2268	0.935809	4.78055	0.00134436	0.0740978
gene_5502	-1.17265	7.05319	0.0013449	0.0740978
gene_6035	2.5112	7.13115	0.00135786	0.0743061
gene_6815	0.973785	7.9783	0.00139439	0.07547
gene_1779	-1.69076	2.6945	0.00139776	0.07547
gene_3971	0.846889	9.52324	0.0014199	0.0758893
gene_3060	0.817471	8.78411	0.00142919	0.0758893
gene_340	-0.92942	6.07541	0.00144528	0.0758893
gene_8120	-0.845508	6.1868	0.00144695	0.0758893
gene_4458	0.807784	5.87785	0.00145238	0.0758893
gene_2232	-1.51062	4.14157	0.00154749	0.0803406
gene_1473	-1.1794	4.67742	0.00157292	0.0811404
gene_4898	0.930184	10.7668	0.00159225	0.081283
gene_6200	-1.56496	3.48206	0.00159575	0.081283
gene_2049	2.59054	-0.660317	0.00161365	0.0816812
gene_2645	-1.51173	4.13	0.00162905	0.0819482
gene_2124	-1.18739	4.6779	0.00165937	0.0829582
gene_3207	2.96191	6.96833	0.00174735	0.0859652
gene_8557	-1.46475	10.0661	0.00174969	0.0859652
gene_1771	4.10064	3.32859	0.00175136	0.0859652
gene_2825	1.04922	5.80777	0.00177087	0.0861013
gene_3891	0.831414	6.74344	0.00177539	0.0861013
gene_2069	-1.23085	5.33647	0.00179393	0.0864823
gene_8616	-1.11549	4.49023	0.00181144	0.0868097
gene_3119	1.24551	6.72936	0.0018245	0.0869214
gene_531	-1.64905	3.15646	0.00186741	0.0884454
gene_6824	1.20103	5.07951	0.00190375	0.089382
gene_1457	-5.35413	3.96343	0.00190926	0.089382
gene_5713	-2.58836	-0.215829	0.00198875	0.0925681
gene_6239	-1.21769	6.88361	0.00201421	0.0932177
gene_741	1.41323	4.56495	0.00207184	0.09534
gene_7559	-0.695821	6.32152	0.00211831	0.0969278
gene_8643	-2.6487	0.437714	0.00213486	0.0971363
gene_6060	1.568	4.05244	0.00216073	0.0977641
gene_4866	0.783927	5.93925	0.00222599	0.0996194
gene_6831	0.801405	8.01718	0.00222634	0.0996194
gene_4512	-2.11138	4.94486	0.00225599	0.100392
gene_4844	1.06734	10.1901	0.00227767	0.100802
gene_1839	-0.912981	5.26503	0.00234325	0.102173
gene_6446	-3.86391	7.7217	0.00234469	0.102173
gene_8050	0.962852	6.06838	0.00236906	0.102173
gene_1310	0.915541	6.36293	0.00237897	0.102173
gene_1862	-0.879878	5.08496	0.00238381	0.102173
gene_7907	1.23086	8.70452	0.00238433	0.102173
gene_5880	-2.07975	1.69383	0.0024093	0.102215
gene_7872	-1.11996	5.03159	0.00241056	0.102215
gene_2986	-1.11288	4.34022	0.00246047	0.103788
gene_324	2.10353	5.93734	0.00248831	0.104419
gene_8041	-2.56518	-0.22128	0.00253781	0.105508
gene_8226	0.765928	7.15264	0.00254033	0.105508
gene_1344	2.73603	1.78261	0.00258407	0.106307
gene_5478	1.76103	6.6287	0.00258581	0.106307
gene_1404	-2.57997	0.89386	0.00260389	0.106509
gene_6560	-1.95053	3.2745	0.0026365	0.10688
gene_5123	0.836422	8.30336	0.00265235	0.10688
gene_1511	-1.06245	4.83723	0.00265254	0.10688
gene_4689	-0.690069	5.98074	0.00270847	0.108331
gene_990	2.02025	8.7375	0.0027153	0.108331
gene_1101	-0.950415	5.58947	0.00277107	0.109984
gene_2856	1.4402	4.65074	0.00278389	0.109984
gene_2780	-1.59605	3.49573	0.00282198	0.110877
gene_6119	-1.75528	2.10619	0.00284419	0.110877
gene_3926	-1.18992	5.02547	0.0028699	0.110877
gene_5350	-0.935743	5.07888	0.0028838	0.110877
gene_5792	-2.53712	1.03069	0.00289247	0.110877
gene_1422	-1.0505	6.18744	0.00289592	0.110877
gene_7863	-0.715758	8.79318	0.00290232	0.110877
gene_8101	-0.674796	5.57861	0.00291864	0.110977
gene_829	0.641251	6.65853	0.00295439	0.11147
gene_7628	-0.74283	5.4397	0.00296321	0.11147
gene_861	-2.60174	0.515457	0.00297289	0.11147
gene_4838	0.904788	7.46788	0.00301891	0.112673
gene_577	0.96141	4.42861	0.00309704	0.11467
gene_3090	0.608011	6.86764	0.00310071	0.11467
gene_4989	2.89224	2.41064	0.00313358	0.115359
gene_2120	-2.92021	2.82766	0.00318869	0.116856
gene_1924	-1.50819	2.88997	0.00328974	0.120016
gene_3238	1.07973	5.08499	0.00333061	0.120813
gene_8042	1.10212	5.16837	0.00334437	0.120813
gene_4586	0.829135	8.1849	0.00335633	0.120813
gene_7974	-0.851105	6.39706	0.003419	0.122524
gene_5934	-1.11446	6.64228	0.00346318	0.123561
gene_1442	-1.1334	5.55735	0.00347968	0.123601
gene_3069	-2.80215	-0.16357	0.00349483	0.123601
gene_4179	0.786112	6.79291	0.0035337	0.124065
gene_6871	1.28154	5.8883	0.00355298	0.124065
gene_3288	0.935691	7.17581	0.00355391	0.124065
gene_6501	1.01677	5.11435	0.00365714	0.127121
gene_5126	0.936952	5.00625	0.00368794	0.127644
gene_6025	2.72396	-0.104505	0.00373385	0.127713
gene_6219	-2.1867	2.86229	0.00375219	0.127713
gene_8550	-0.807565	6.92474	0.00375854	0.127713
gene_473	0.893665	5.76109	0.00376867	0.127713
gene_1157	-2.40066	0.851897	0.0037688	0.127713
gene_3080	-0.635276	7.17775	0.00388311	0.131039
gene_148	0.702646	6.88955	0.00391265	0.131488
gene_4543	-1.63994	3.09351	0.00394833	0.132138
gene_6558	-2.78476	5.54952	0.00400077	0.133343
gene_970	-0.768009	7.12228	0.00404246	0.133648
gene_505	2.0528	3.39323	0.00404295	0.133648
gene_1372	-1.81932	3.08962	0.00406435	0.133718
gene_5225	-1.71026	3.4598	0.00407809	0.133718
gene_1628	1.71394	1.84683	0.00415604	0.134368
gene_4547	-1.13294	6.14372	0.0041649	0.134368
gene_2241	1.08066	6.32978	0.00416822	0.134368
gene_7999	0.756342	8.49749	0.00417081	0.134368
gene_5912	0.81311	4.94423	0.00418172	0.134368
gene_4559	-1.38252	3.48802	0.00419744	0.134368
gene_7779	1.92345	2.51428	0.00423499	0.135036
gene_155	0.741415	7.16971	0.0042685	0.135571
gene_8504	-3.61297	5.75896	0.00432426	0.136341
gene_8096	-2.57806	1.03926	0.00432641	0.136341
gene_2522	0.72047	6.75903	0.00447611	0.140512
gene_2467	-1.61694	2.17132	0.00457447	0.142619
gene_5484	3.0129	5.17386	0.00457847	0.142619
gene_2844	-0.667507	7.00507	0.00459759	0.142666
gene_7989	1.20981	3.87985	0.0046411	0.143085
gene_8243	-0.704377	7.02795	0.00464643	0.143085
gene_6521	3.28801	0.346341	0.00466438	0.143094
gene_7418	-2.39737	-0.570634	0.00468614	0.143216
gene_4743	-1.15193	6.84612	0.00470374	0.143216
gene_655	-0.950904	5.00001	0.00472975	0.143469
gene_1587	-1.88995	2.06318	0.00479635	0.144946
gene_2527	2.45372	4.03511	0.00483314	0.145515
gene_2883	1.11537	5.04639	0.00487015	0.145937
gene_4495	-1.94773	1.48329	0.00488319	0.145937
gene_5992	-2.30233	8.39931	0.0049261	0.146678
gene_20	0.820027	6.23562	0.00495926	0.147125
gene_493	0.650608	6.29569	0.0050029	0.147668
gene_6936	-0.742848	6.37538	0.00501402	0.147668
gene_6421	-2.58535	2.1753	0.0050459	0.147751
gene_5229	0.97978	7.634	0.00507082	0.147751
gene_1137	3.02864	4.48034	0.00507158	0.147751
gene_1338	-2.06197	1.47017	0.00512318	0.148252
gene_4280	-0.841612	4.56477	0.00517142	0.148252
gene_169	1.84051	6.13789	0.00518291	0.148252
gene_6107	0.623219	8.51922	0.00519263	0.148252
gene_802	-0.910018	5.47545	0.00522352	0.148252
gene_66	-1.25202	4.49244	0.00523019	0.148252
gene_8642	-1.85493	4.31865	0.00524461	0.148252
gene_4906	-0.997837	5.3934	0.00524601	0.148252
gene_5507	0.923289	6.41795	0.00525354	0.148252
gene_6632	2.89328	8.94201	0.00531186	0.149378
gene_4126	-1.22957	3.91604	0.00544562	0.152172
gene_725	0.792198	7.46572	0.00544879	0.152172
gene_2660	-1.31544	6.68373	0.00547241	0.152248
gene_350	0.567739	6.32922	0.00548912	0.152248
gene_6226	-1.50679	5.07144	0.00554657	0.153
gene_2019	0.929079	4.41675	0.00558239	0.153
gene_8312	-0.89478	4.58692	0.0055865	0.153
gene_8704	0.846905	6.08538	0.00560569	0.153
gene_8249	0.768635	7.32873	0.00561069	0.153
gene_5861	0.866355	5.03827	0.00565157	0.153598
gene_6779	1.24349	6.92745	0.00574849	0.15493
gene_860	-3.37887	1.11527	0.00576789	0.15493
gene_3755	0.862824	3.77288	0.00578934	0.15493
gene_7259	0.807748	6.74628	0.00579785	0.15493
gene_4315	3.07649	5.38328	0.00580515	0.15493
gene_2224	-0.705545	5.53521	0.00581538	0.15493
gene_582	0.979041	8.00284	0.00585811	0.155263
gene_5421	-0.85842	4.77993	0.00588095	0.155263
gene_5137	0.78598	5.16201	0.00588836	0.155263
gene_8540	-1.08087	4.91782	0.00590454	0.155263
gene_4770	-0.890712	4.32993	0.00595101	0.155794
gene_6706	-1.14587	4.94303	0.0059632	0.155794
gene_564	1.07346	5.37258	0.0060019	0.1563
gene_3544	-1.18141	5.22914	0.00606407	0.156428
gene_2248	0.739661	5.65531	0.00608295	0.156428
gene_1633	1.40292	3.3842	0.0060979	0.156428
gene_5617	-0.698029	7.65615	0.0061086	0.156428
gene_7326	0.691503	6.3405	0.00616105	0.156428
gene_5982	-1.22248	3.45917	0.00616483	0.156428
gene_1763	1.22195	6.0558	0.00618181	0.156428
gene_5332	1.61277	3.09533	0.0061878	0.156428
gene_654	-1.43274	3.09072	0.00619954	0.156428
gene_3329	0.986363	6.96321	0.00619995	0.156428
gene_3169	1.13657	10.535	0.00623287	0.156606
gene_4831	0.719346	5.9477	0.0062563	0.156606
gene_7426	-1.15789	4.47003	0.00626503	0.156606
gene_3372	0.84588	6.53894	0.00630878	0.157215
gene_8286	-0.843504	4.55907	0.00636127	0.158037
gene_6494	-1.49346	4.11955	0.006382	0.158067
gene_7379	-0.611844	7.1616	0.00641336	0.158359
gene_2989	0.707801	6.61901	0.00651422	0.159517
gene_2126	-0.801641	6.87671	0.00652405	0.159517
gene_4235	-2.01509	-0.424029	0.0065242	0.159517
gene_3397	1.45418	8.40373	0.00653902	0.159517
gene_396	-0.803649	8.27191	0.00659088	0.159587
gene_3042	0.595855	6.28117	0.00663475	0.159587
gene_4091	-1.3079	3.01613	0.00663794	0.159587
gene_7837	-1.65749	3.86682	0.00668803	0.159587
gene_5254	-1.1269	4.65637	0.00671046	0.159587
gene_2123	-1.43567	4.47214	0.00675716	0.159587
gene_2420	-1.04449	4.23473	0.00677241	0.159587
gene_3072	2.21278	4.54833	0.0067907	0.159587
gene_6397	0.996864	6.77539	0.00679128	0.159587
gene_8438	0.597071	6.04574	0.00679578	0.159587
gene_5601	1.36699	6.28725	0.00681008	0.159587
gene_7959	0.511075	7.37123	0.00681675	0.159587
gene_5170	1.03616	3.68284	0.00684788	0.159587
gene_5511	0.729619	7.49958	0.00685031	0.159587
gene_2166	0.659986	8.0378	0.00688369	0.159587
gene_6143	1.15766	9.76679	0.00690637	0.159587
gene_4350	0.746459	6.6327	0.00691061	0.159587
gene_221	-1.74861	2.32081	0.00691173	0.159587
gene_3204	1.09134	4.46529	0.0069163	0.159587
gene_4293	1.29556	4.38024	0.00694032	0.159686
gene_6484	0.738298	5.33539	0.0069735	0.159995
gene_7386	2.66217	3.92381	0.00701197	0.160424
gene_5796	2.11828	5.38743	0.00708169	0.161562
gene_4773	-1.66639	2.16646	0.00721071	0.164044
gene_2251	-0.714139	8.42596	0.00729053	0.165231
gene_2421	-1.31367	8.51991	0.00730369	0.165231
gene_1367	0.75336	4.73734	0.00741071	0.166871
gene_4654	0.632269	6.94532	0.0074174	0.166871
gene_6805	-1.26866	7.2953	0.00745032	0.167147
gene_1041	0.672881	6.40724	0.0075191	0.168224
gene_4380	-1.2639	2.5491	0.00761278	0.169851
gene_8480	1.64425	2.71947	0.00764501	0.170102
gene_907	0.632719	6.13117	0.00767277	0.170251
gene_8234	0.541612	7.14092	0.00771651	0.170475
gene_4371	-1.47197	3.92397	0.00772496	0.170475
gene_1396	1.35359	5.27034	0.00778697	0.170659
gene_3579	1.22201	7.50562	0.00781597	0.170659
gene_4147	-1.52884	2.42502	0.0078257	0.170659
gene_3142	0.899935	5.17673	0.00783082	0.170659
gene_6027	0.766749	7.39966	0.00785716	0.170659
gene_1238	1.03917	5.33541	0.00785971	0.170659
gene_8639	-0.806561	6.16629	0.00792028	0.171514
gene_7268	0.672462	7.67894	0.00798393	0.172185
gene_7167	0.651774	6.19324	0.00799375	0.172185
gene_5237	-0.922979	4.42071	0.00803469	0.172224
gene_767	-2.40346	2.39427	0.00805229	0.172224
gene_7535	-1.09276	6.3146	0.00807461	0.172224
gene_7883	0.614295	5.93601	0.00808063	0.172224
gene_4411	-0.630234	7.21855	0.00811237	0.172345
gene_3836	-1.11044	3.99351	0.0081289	0.172345
gene_8301	-0.814371	6.30363	0.00819342	0.172435
gene_8194	-1.13721	5.69491	0.00819561	0.172435
gene_5731	-1.04133	4.74266	0.00820265	0.172435
gene_7536	-0.932707	3.70239	0.00821829	0.172435
gene_7378	0.746785	5.36971	0.00827438	0.173002
gene_8624	-1.87377	1.79464	0.00828805	0.173002
gene_1435	-1.20779	3.61561	0.00832647	0.17301
gene_7387	-2.35242	1.31826	0.00835139	0.17301
gene_1192	-2.14922	0.400119	0.00835896	0.17301
gene_8133	2.25112	0.844641	0.00837386	0.17301
gene_5354	-1.8256	-0.635357	0.00840506	0.173213
gene_950	-0.743217	5.48956	0.00844582	0.17331
gene_3457	0.800188	5.00718	0.0084526	0.17331
gene_3334	-1.00843	5.11083	0.00847716	0.173375
gene_5602	0.830208	6.9086	0.00853639	0.174147
gene_7434	-1.10235	6.46225	0.0085582	0.174153
gene_436	-1.22232	3.15859	0.00859271	0.174417
gene_8217	0.621313	5.98966	0.00862256	0.174585
gene_4537	1.72303	5.14129	0.00870464	0.175342
gene_7160	-0.62056	6.68758	0.0087247	0.175342
gene_2864	-0.713235	8.29468	0.0087249	0.175342
gene_4879	-1.10426	5.45243	0.00880824	0.176579
gene_4896	1.39016	4.59255	0.00895223	0.179022
gene_7113	0.772806	6.42843	0.00902336	0.17999
gene_8712	-0.977552	4.09536	0.00904505	0.17999
gene_5726	0.622482	6.26428	0.00909628	0.180515
gene_5868	1.00425	4.54722	0.00912881	0.180515
gene_154	1.13013	3.88844	0.0091383	0.180515
gene_4311	2.00885	2.77232	0.00917475	0.180676
gene_336	0.599631	7.01387	0.00921287	0.180676
gene_4403	-1.04881	4.08127	0.0092134	0.180676
gene_7317	1.15751	5.62694	0.00924781	0.180913
gene_5180	-1.08627	4.18163	0.00941015	0.183645
gene_5166	2.89152	4.09278	0.00944488	0.18388
gene_8728	0.950705	6.30793	0.00957396	0.185628
gene_8670	1.38517	8.52477	0.00958272	0.185628
gene_8158	0.991097	9.63172	0.0096038	0.185628
gene_51	0.628237	6.84203	0.00965856	0.185628
gene_1927	0.90595	4.75295	0.00968794	0.185628
gene_1308	-0.974231	5.76104	0.00971783	0.185628
gene_2486	-0.604499	5.56872	0.00971854	0.185628
gene_3959	-0.615216	6.88575	0.00972901	0.185628
gene_7690	0.631871	6.82188	0.00976033	0.185628
gene_5444	0.7319	7.71796	0.00976387	0.185628
gene_2058	-1.65624	1.7077	0.00988217	0.187044
gene_1513	-0.934567	4.17855	0.00989803	0.187044
gene_3914	1.94403	0.0309894	0.00992905	0.187044
gene_2137	-1.13034	3.5761	0.00993075	0.187044
gene_7006	-2.79077	6.59202	0.0101019	0.189826
gene_8366	0.964889	3.69551	0.0103683	0.194169
gene_5015	0.741989	7.68733	0.0103809	0.194169
gene_6284	0.782775	8.27154	0.010417	0.19418
gene_299	0.680319	5.91172	0.0104295	0.19418
gene_7634	0.92497	4.6164	0.0104628	0.194354
gene_7607	-1.04826	4.92157	0.0105555	0.195628
gene_6539	-0.725256	5.22403	0.0106192	0.195681
gene_5693	-2.13776	1.36116	0.0106297	0.195681
gene_1286	0.510473	6.98452	0.0106529	0.195681
gene_2213	-1.76894	1.74942	0.0106551	0.195681
gene_7861	0.903012	9.4413	0.0107057	0.196034
gene_6766	-0.716781	5.82791	0.0107227	0.196034
gene_3305	0.632861	6.37871	0.0108418	0.197765
gene_5658	1.11098	3.99159	0.0109728	0.199514
gene_2160	-1.10913	3.95335	0.0110106	0.199514
gene_8235	-1.04794	3.00004	0.0110206	0.199514
gene_151	0.679491	6.23795	0.0110362	0.199514
gene_5622	-1.93371	1.89918	0.0110754	0.199777
gene_6206	-0.538183	7.53296	0.0111366	0.200434
gene_839	1.06351	2.90463	0.0111796	0.200476
gene_77	0.921193	6.91104	0.0111884	0.200476
gene_2195	-0.921493	5.72559	0.0112533	0.200794
gene_6943	-1.50268	4.8302	0.0112558	0.200794
gene_1030	1.14271	8.8571	0.0112989	0.201043
gene_4033	-0.876199	6.44584	0.0113205	0.201043
gene_3585	1.32105	6.46379	0.0113442	0.201043
gene_8131	-1.58611	3.70885	0.0115244	0.202537
gene_477	0.977099	6.03568	0.0115404	0.202537
gene_8851	-4.04309	2.06105	0.0115442	0.202537
gene_6459	-1.15958	3.041	0.0115626	0.202537
gene_1184	-0.95835	4.23571	0.011576	0.202537
gene_1801	1.39727	5.43664	0.0115785	0.202537
gene_1023	0.922243	4.94084	0.0116543	0.203007
gene_2823	-1.53359	3.51892	0.0116555	0.203007
gene_7310	-0.606048	5.91425	0.0117358	0.203524
gene_456	-0.592882	5.81284	0.0117464	0.203524
gene_4691	-1.21951	4.91585	0.0117628	0.203524
gene_7082	-0.838203	4.77043	0.0117857	0.203524
gene_2725	-1.85161	1.17875	0.0118204	0.203688
gene_1012	0.934548	5.1197	0.0118744	0.204183
gene_1371	-1.40769	2.58234	0.0119581	0.204832
gene_6944	-2.5468	2.05846	0.0119627	0.204832
gene_7719	1.92345	4.15955	0.0120091	0.205112
gene_6144	-0.812928	4.61551	0.0120438	0.205112
gene_2959	-1.07849	8.1973	0.012055	0.205112
gene_2131	-1.17325	2.889	0.0120833	0.205163
gene_8835	0.675216	5.56537	0.0121122	0.205224
gene_623	-0.733828	5.37622	0.0121499	0.205243
gene_8274	-1.88484	1.79472	0.0121835	0.205243
gene_2975	0.686007	6.42333	0.0121894	0.205243
gene_6901	0.582483	6.45197	0.0122726	0.206215
gene_8784	-0.78913	4.65751	0.0123323	0.20679
gene_4265	-0.828524	4.49004	0.0124615	0.208524
gene_401	-1.82275	1.55848	0.0125109	0.208919
gene_7278	2.33398	3.8194	0.012597	0.209785
gene_6954	1.27118	5.70181	0.0126445	0.209785
gene_4806	0.593033	7.28551	0.01265	0.209785
gene_4122	-2.19885	1.27723	0.0126663	0.209785
gene_3685	-1.60986	3.49311	0.0127625	0.210946
gene_1326	0.641128	7.58726	0.0128135	0.211357
gene_859	-2.24211	3.85916	0.0129065	0.212459
gene_4830	1.11876	5.08102	0.0129401	0.21258
gene_1527	0.656223	5.07861	0.0130239	0.213523
gene_3735	-0.952225	3.4433	0.0131294	0.214818
gene_1287	-1.1064	4.54697	0.0131851	0.214887
gene_7097	0.87404	5.34226	0.0131867	0.214887
gene_6694	0.533169	6.44433	0.0132803	0.215575
gene_342	1.02611	5.70036	0.0132955	0.215575
gene_3459	0.926115	4.54558	0.0133195	0.215575
gene_4877	0.523463	7.97381	0.0133459	0.215575
gene_8215	0.843555	11.262	0.013362	0.215575
gene_8651	-1.27333	2.88085	0.0134235	0.215737
gene_8219	-0.806057	4.48695	0.0134416	0.215737
gene_6431	0.671558	6.99095	0.0134624	0.215737
gene_6168	0.843553	5.27922	0.0135019	0.215737
gene_5454	-2.038	0.543909	0.0135153	0.215737
gene_8778	-1.99636	0.300816	0.0135318	0.215737
gene_2572	0.544852	7.58971	0.0135626	0.215803
gene_4955	0.563765	7.11086	0.0138034	0.219204
gene_5099	0.492493	7.24258	0.0139129	0.220244
gene_5446	1.87666	7.16452	0.0139368	0.220244
gene_8044	-0.744551	5.83378	0.0139611	0.220244
gene_1301	0.912421	4.9155	0.0139777	0.220244
gene_3380	0.819092	8.50434	0.0140087	0.220304
gene_1917	0.755174	5.92158	0.0140593	0.220469
gene_1896	-1.71742	0.0428877	0.0140804	0.220469
gene_7156	0.536326	7.16292	0.0141451	0.220469
gene_4434	-1.98373	2.2803	0.014186	0.220469
gene_4085	0.811087	6.05641	0.0142036	0.220469
gene_6629	0.620892	10.1805	0.0142113	0.220469
gene_3276	-0.931064	3.3816	0.0142498	0.220469
gene_5766	-1.067	3.37564	0.0142533	0.220469
gene_4747	-0.609233	6.80857	0.0142977	0.220469
gene_6664	-1.48001	2.41485	0.0143109	0.220469
gene_5071	-1.91265	1.88079	0.0143186	0.220469
gene_2424	-1.80309	0.820009	0.0143575	0.22048
gene_4266	-0.642043	7.08248	0.0143738	0.22048
gene_4685	-1.0215	3.39096	0.0144551	0.220687
gene_2634	0.806237	5.10967	0.0145086	0.220687
gene_7773	0.721699	6.05518	0.0145224	0.220687
gene_8607	-1.50361	2.53682	0.014566	0.220687
gene_7580	0.565171	6.73641	0.0145886	0.220687
gene_7248	-1.09949	4.15247	0.0145913	0.220687
gene_1145	-1.71497	5.24844	0.0146205	0.220687
gene_5467	-2.63905	5.4611	0.014626	0.220687
gene_4151	-0.50145	8.04454	0.0146325	0.220687
gene_1156	0.70393	5.96971	0.0146961	0.221004
gene_1004	-0.525017	5.87269	0.0147082	0.221004
gene_8211	0.73235	4.98654	0.0147576	0.221006
gene_4352	-1.94029	-0.120098	0.0147628	0.221006
gene_8186	-1.61135	4.62181	0.0148837	0.221995
gene_5976	-0.956454	6.2233	0.0148837	0.221995
gene_1586	0.694914	5.37352	0.0150138	0.22346
gene_534	-1.00056	4.00982	0.0150575	0.22346
gene_6667	-0.981665	3.40626	0.0150647	0.22346
gene_3772	1.10758	5.73732	0.0151523	0.223824
gene_5526	0.728568	8.70174	0.015175	0.223824
gene_8043	0.645684	5.77566	0.0151911	0.223824
gene_2523	1.38531	9.37057	0.0151998	0.223824
gene_904	0.597899	6.38386	0.0152623	0.22425
gene_3244	-0.891831	4.44368	0.015349	0.22425
gene_636	1.30089	4.36066	0.0153522	0.22425
gene_8272	-0.953268	4.06281	0.0153631	0.22425
gene_366	-0.978451	3.34425	0.0153672	0.22425
gene_2753	0.777478	6.05102	0.0154674	0.224962
gene_895	0.576927	6.1243	0.0154941	0.224962
gene_1891	0.723798	7.67435	0.015515	0.224962
gene_3686	-1.02161	2.78025	0.015527	0.224962
gene_3236	-0.909082	5.17843	0.0155561	0.22498
gene_2199	1.80878	1.66623	0.0155944	0.225132
gene_333	-0.821946	7.19996	0.0156803	0.225656
gene_7403	0.597265	10.204	0.0156887	0.225656
gene_2886	-2.39682	1.89118	0.0157631	0.225656
gene_6676	0.707352	6.12377	0.0157771	0.225656
gene_5065	-0.757688	5.51908	0.015782	0.225656
gene_1909	-1.77351	2.89153	0.0157979	0.225656
gene_6086	0.501883	7.03596	0.0159236	0.227052
gene_4795	-0.910137	3.66132	0.0159815	0.227477
gene_2676	-0.637374	6.34934	0.0160776	0.227657
gene_5024	1.25218	8.11961	0.0160841	0.227657
gene_6079	-1.29251	4.74739	0.0160875	0.227657
gene_3217	1.52149	4.37609	0.0161295	0.227657
gene_8424	0.698915	5.89305	0.0161347	0.227657
gene_1943	-0.673307	5.02783	0.0162308	0.228419
gene_375	-0.871485	4.00551	0.0162733	0.228419
gene_6775	3.02454	2.93634	0.0162733	0.228419
gene_6795	-1.20214	9.55402	0.0163021	0.228426
gene_2739	0.728584	7.2098	0.0163442	0.228621
gene_7715	-1.70758	2.66432	0.0164689	0.229968
gene_4822	-0.72588	7.4318	0.0165155	0.230222
gene_2746	0.621757	10.2318	0.016548	0.230278
gene_3144	-1.55015	1.9295	0.0165833	0.230374
gene_4725	-0.586458	8.61853	0.0166235	0.230537
gene_1482	0.65867	7.52301	0.0166605	0.230655
gene_1519	-0.762693	10.3472	0.0167066	0.230898
gene_6275	0.640935	7.23584	0.0167842	0.231207
gene_3056	-0.460112	7.89656	0.0168148	0.231207
gene_4225	0.830412	4.50589	0.0168646	0.231207
gene_7164	0.556929	8.26889	0.0168766	0.231207
gene_8314	-0.812937	5.81679	0.0169124	0.231207
gene_7469	0.474461	5.85698	0.0169166	0.231207
gene_4455	-0.884944	6.79507	0.0169287	0.231207
gene_4116	1.11379	10.0636	0.0169785	0.231496
gene_5393	0.696161	6.05772	0.0170735	0.2324
gene_6912	-1.44483	7.11485	0.0171217	0.232666
gene_6066	-1.12519	1.8923	0.0171995	0.233332
gene_1936	-0.682909	7.16991	0.0172546	0.23352
gene_2549	-2.16079	-0.20451	0.0172711	0.23352
gene_7533	-1.0754	4.23203	0.0173259	0.233871
gene_7972	-1.30851	2.8333	0.0174575	0.235255
gene_699	-0.722793	4.67593	0.0176027	0.236218
gene_6961	0.722389	10.4104	0.0176091	0.236218
gene_4679	-0.992119	7.57938	0.0176381	0.236218
gene_3239	0.80051	4.5827	0.0176582	0.236218
gene_1637	-0.734022	4.08034	0.0176748	0.236218
gene_8382	0.665537	9.01669	0.0177107	0.236308
gene_6255	0.775474	4.70449	0.0178217	0.236971
gene_5195	-0.539143	7.0985	0.0178315	0.236971
gene_7627	0.77598	4.95915	0.0178481	0.236971
gene_6067	0.70137	7.49653	0.0179289	0.237653
gene_2029	-1.53482	2.26325	0.0179738	0.237859
gene_2852	-0.840195	3.5575	0.0180269	0.238172
gene_6353	0.485314	6.20963	0.0181113	0.238898
gene_8307	-1.14465	5.91947	0.0181944	0.239368
gene_7753	-1.4377	2.78314	0.0182061	0.239368
gene_2011	-2.17941	1.0945	0.0182646	0.239678
gene_4733	0.56323	6.21789	0.0183467	0.239678
gene_671	-1.06204	3.05654	0.0184161	0.239678
gene_927	0.648604	5.87525	0.0184263	0.239678
gene_7761	1.26024	5.56045	0.0184394	0.239678
gene_7357	0.693421	7.31334	0.0184511	0.239678
gene_1978	-1.84474	-0.611186	0.0184742	0.239678
gene_1031	-1.71742	0.227514	0.0184927	0.239678
gene_6146	0.989818	6.14724	0.0185179	0.239678
gene_954	0.652104	8.78988	0.0185256	0.239678
gene_1162	-0.766252	5.49629	0.018668	0.240532
gene_6285	-0.571277	8.03497	0.0186764	0.240532
gene_2895	1.21086	4.50884	0.0187258	0.240532
gene_1114	-0.561826	6.13086	0.0187585	0.240532
gene_176	-0.851992	3.77349	0.0187788	0.240532
gene_4721	-1.08495	5.30514	0.0187897	0.240532
gene_7177	0.547258	9.25834	0.0187995	0.240532
gene_7355	0.493784	8.55641	0.0188318	0.240566
gene_484	-1.28317	2.27283	0.0189391	0.241556
gene_8017	0.64162	6.31227	0.0190306	0.24234
gene_158	-0.552474	9.47135	0.0191725	0.243349
gene_2837	-0.686621	11.8059	0.0192665	0.243349
gene_7557	-1.00224	3.28713	0.0192707	0.243349
gene_2807	1.26282	2.25431	0.0192764	0.243349
gene_1102	-1.01014	3.45732	0.019288	0.243349
gene_1142	-1.48618	1.48799	0.0193014	0.243349
gene_811	-1.94421	-0.332128	0.0193518	0.243349
gene_7499	0.61946	8.13473	0.0193771	0.243349
gene_2027	-2.24088	1.37583	0.0193802	0.243349
gene_1136	-0.733315	4.28188	0.0194901	0.24435
gene_1006	0.530404	8.53749	0.0195403	0.244601
gene_1409	-2.30711	-0.212701	0.0196701	0.245846
gene_625	4.45593	2.80992	0.0198303	0.247466
gene_63	-2.14287	-0.0664843	0.0198702	0.247582
gene_8762	-1.52012	2.14616	0.0199067	0.247657
gene_6402	-1.25767	3.58278	0.0199746	0.24812
gene_5705	0.658846	7.23826	0.0200482	0.248653
gene_4331	0.591208	6.38873	0.0201374	0.249378
gene_8707	-0.567893	5.722	0.0202225	0.250049
gene_3057	-1.12271	3.6157	0.0203368	0.251079
gene_3953	-0.784722	4.55713	0.0203679	0.251081
gene_4974	-0.836176	4.54621	0.0204748	0.252014
gene_7933	1.09259	2.21819	0.0205659	0.252752
gene_6637	0.77429	4.49285	0.0206208	0.253042
gene_4931	0.505892	6.30642	0.0206848	0.253443
gene_6420	-1.05439	3.25517	0.0207348	0.253673
gene_503	-0.946749	7.14499	0.0209256	0.255621
gene_7884	0.73644	4.73759	0.0209627	0.255688
gene_219	1.02681	4.04189	0.0210309	0.256135
gene_8676	-0.553738	6.17274	0.0211456	0.257144
gene_8134	-1.04782	3.41597	0.0212125	0.257546
gene_4163	-0.600354	6.92038	0.0212422	0.257546
gene_6970	-0.915487	3.56625	0.0213173	0.257926
gene_7500	0.618556	5.09518	0.0213732	0.257926
gene_2324	0.811187	4.59679	0.0213836	0.257926
gene_7541	-1.06426	6.20715	0.0214282	0.257926
gene_5333	-1.29907	2.46634	0.0214328	0.257926
gene_1040	0.607192	6.45507	0.0215199	0.258589
gene_7646	-0.579694	7.17053	0.021595	0.25895
gene_3751	0.54178	6.99253	0.0216138	0.25895
gene_7359	1.15886	4.74183	0.0217445	0.259847
gene_7328	0.822809	4.62016	0.0217528	0.259847
gene_5408	0.65754	8.76035	0.0219529	0.261439
gene_4083	-1.53841	2.272	0.0219731	0.261439
gene_4732	-0.604144	6.15019	0.021983	0.261439
gene_7765	0.569815	6.70381	0.0221471	0.262967
gene_6113	1.94426	3.79165	0.0221763	0.262967
gene_6923	1.13948	3.77646	0.0222171	0.263064
gene_8717	-0.749227	4.96375	0.022308	0.263755
gene_1964	-1.17213	3.9268	0.0223444	0.2638
gene_633	0.786406	5.37781	0.0225002	0.265253
gene_1477	1.32116	3.56911	0.0225612	0.265586
gene_258	1.23792	2.80886	0.0226432	0.266165
gene_1456	-1.47159	0.645379	0.0227578	0.266928
gene_809	0.938858	4.95319	0.0227741	0.266928
gene_6261	-0.962199	2.44468	0.0229208	0.268259
gene_7650	0.522953	6.77485	0.0229664	0.268406
gene_1483	-0.591494	5.03467	0.023039	0.268857
gene_1635	1.54771	1.17177	0.0230728	0.268857
gene_3781	-0.625672	7.09429	0.0231046	0.268857
gene_4216	0.486401	7.98314	0.0233403	0.27121
gene_758	0.556376	7.39116	0.0234331	0.271424
gene_5341	0.98146	4.13692	0.0234334	0.271424
gene_6532	-0.814132	4.04617	0.0234593	0.271424
gene_5795	1.61982	6.63822	0.0235045	0.271559
gene_7871	0.748751	8.4833	0.0235987	0.272259
gene_6126	-0.945302	3.83379	0.0236827	0.272839
gene_6094	0.724658	5.73678	0.0237595	0.273145
gene_7008	-1.05196	1.38951	0.0237766	0.273145
gene_5677	0.513038	7.35991	0.0239008	0.274182
gene_7115	0.90059	5.54628	0.0239784	0.274683
gene_768	-0.794375	7.38427	0.0240176	0.274743
gene_2007	-0.747585	5.04582	0.024095	0.27524
gene_6562	-2.27345	0.518899	0.0241487	0.275466
gene_2305	-1.01	7.66434	0.0242706	0.276443
gene_2934	0.519102	7.32868	0.0243027	0.276443
gene_6566	-0.616913	5.8715	0.024379	0.276553
gene_5092	-1.06247	5.04727	0.0244148	0.276553
gene_7625	0.499058	6.75932	0.0244148	0.276553
gene_7446	-0.654443	5.08713	0.0244665	0.276752
gene_5322	-1.41544	2.12314	0.0248339	0.280515
gene_5235	-1.42758	2.20535	0.024888	0.280735
gene_3412	0.56463	6.72229	0.0250456	0.28147
gene_4584	-1.60837	1.97851	0.0250797	0.28147
gene_3205	0.759742	7.97732	0.0250833	0.28147
gene_4357	-0.788244	5.84242	0.0250921	0.28147
gene_8410	-0.67643	5.76369	0.0251431	0.281473
gene_460	-2.09649	-0.117567	0.0251784	0.281473
gene_68	-0.92894	3.19126	0.0251967	0.281473
gene_4652	-1.26202	3.83289	0.0253125	0.281491
gene_4078	-1.20193	2.94298	0.0253132	0.281491
gene_2249	-0.717087	4.24314	0.0253338	0.281491
gene_69	-0.672162	5.40583	0.0253426	0.281491
gene_8601	1.07572	5.68836	0.025417	0.281491
gene_4321	-0.856019	4.13972	0.0254175	0.281491
gene_7021	-0.794634	6.1286	0.0254562	0.281491
gene_5154	0.799723	6.349	0.0254763	0.281491
gene_598	-0.674919	5.82883	0.0256032	0.282507
gene_7633	0.85133	4.31415	0.0257116	0.283318
gene_109	0.73695	9.18141	0.0257587	0.28345
gene_7084	1.8402	1.91542	0.0258293	0.283842
gene_7671	-0.502089	7.95508	0.0260601	0.285683
gene_6839	0.557927	5.99827	0.0260762	0.285683
gene_4595	-1.05775	3.30516	0.0261027	0.285683
gene_7003	0.546745	6.31703	0.0262135	0.285999
gene_5525	0.725839	6.04655	0.0262892	0.285999
gene_6657	-0.565487	5.10706	0.0263202	0.285999
gene_4100	0.860495	5.72137	0.0263389	0.285999
gene_8790	1.18161	3.48868	0.0263522	0.285999
gene_3223	-1.19428	3.15832	0.0263853	0.285999
gene_5644	-0.595265	5.36233	0.0263981	0.285999
gene_1063	-0.963064	3.59725	0.0264303	0.285999
gene_1490	0.507298	6.53216	0.0264493	0.285999
gene_6987	-1.1188	3.3153	0.0265384	0.286579
gene_3833	-1.02423	4.3256	0.0267281	0.288244
gene_8139	-1.17921	4.02539	0.0268101	0.288744
gene_2216	1.13273	4.8381	0.0269569	0.28877
gene_1980	-1.71341	1.17192	0.0269668	0.28877
gene_2018	-1.38603	3.37761	0.0269762	0.28877
gene_5506	-2.1452	1.1455	0.0269922	0.28877
gene_3925	-1.20322	2.10912	0.0270356	0.28877
gene_5345	-1.6361	1.83313	0.0270357	0.28877
gene_4046	0.721214	8.45648	0.0270622	0.28877
gene_284	0.579242	4.84887	0.027177	0.289338
gene_926	2.13699	1.26752	0.0271869	0.289338
gene_5377	0.558666	5.47612	0.0272635	0.289773
gene_6794	-1.72878	2.06291	0.0274022	0.29082
gene_1174	-2.34478	-0.156168	0.0274338	0.29082
gene_6975	-0.677475	5.3852	0.027514	0.291289
gene_518	0.627623	6.25514	0.0275683	0.291483
gene_6826	0.549813	7.1709	0.0276405	0.291865
gene_8498	0.588793	6.64224	0.0277392	0.292526
gene_3658	-0.809093	6.32523	0.027806	0.292849
gene_2714	0.461358	6.12364	0.0278798	0.293137
gene_8621	-0.698864	5.08277	0.0279057	0.293137
gene_4035	-1.83514	0.891207	0.0280492	0.294262
gene_4528	-2.01509	-0.546462	0.0281419	0.29458
gene_451	0.650127	7.12899	0.0281523	0.29458
gene_2839	-0.597229	6.96345	0.0282176	0.294682
gene_7124	1.37827	9.18471	0.0282348	0.294682
gene_2257	0.497671	6.08582	0.0283097	0.295084
gene_5452	-1.24774	2.99007	0.0285106	0.29628
gene_6479	-0.57661	4.78339	0.0285417	0.29628
gene_2369	0.838088	5.07142	0.0285682	0.29628
gene_8529	0.511389	7.42389	0.0285846	0.29628
gene_8657	-1.07137	2.61143	0.0286432	0.29628
gene_7407	0.531401	5.61879	0.0286439	0.29628
gene_4240	0.540678	8.73622	0.0287826	0.297197
gene_380	1.3875	2.39716	0.0288695	0.297197
gene_7915	1.7808	0.270985	0.0288731	0.297197
gene_1629	-1.13569	2.67876	0.0288793	0.297197
gene_6803	0.476643	6.7286	0.0289875	0.297803
gene_5833	0.615158	5.80581	0.0290118	0.297803
gene_4802	1.21999	4.63249	0.0291342	0.298629
gene_3247	0.637882	5.63656	0.029166	0.298629
gene_2808	0.593865	6.44952	0.0292676	0.299291
gene_3460	-0.844511	5.20571	0.0293748	0.300008
gene_1493	0.484606	6.66229	0.0295078	0.300987
gene_6313	-0.509178	6.85255	0.0295589	0.301129
gene_1166	-0.904526	4.66992	0.0296059	0.301229
gene_5813	-0.609459	6.36127	0.0296874	0.301417
gene_5362	0.528465	6.25591	0.0297009	0.301417
gene_7709	-1.47024	4.79426	0.029736	0.301417
gene_7501	-1.90437	1.0296	0.0297975	0.301662
gene_7957	1.33369	3.01138	0.0298976	0.302298
gene_1705	-0.743581	4.50816	0.0300004	0.302856
gene_6911	-0.681202	5.10019	0.0300624	0.302856
gene_7240	-1.04547	3.51497	0.030094	0.302856
gene_6058	-1.48638	1.59076	0.0301222	0.302856
gene_6247	0.930471	5.55623	0.0301526	0.302856
gene_2130	-1.53757	1.62624	0.0302066	0.302856
gene_3978	-0.861557	3.28666	0.0302216	0.302856
gene_4870	-1.41842	8.04514	0.030304	0.302856
gene_8724	-1.07855	3.45189	0.0303443	0.302856
gene_495	-0.918984	4.2302	0.0303495	0.302856
gene_4557	-2.07437	0.465544	0.0304332	0.302856
gene_3027	0.948009	3.49093	0.0305071	0.302856
gene_5965	-0.706445	4.96379	0.0305255	0.302856
gene_7691	-0.532128	5.29654	0.0305339	0.302856
gene_6411	-1.07616	3.02938	0.0306152	0.302856
gene_2878	0.784765	4.31619	0.0306506	0.302856
gene_1322	0.475806	5.61362	0.0307153	0.302856
gene_1778	-1.19165	5.51451	0.0307721	0.302856
gene_2898	-0.681913	5.43699	0.0308026	0.302856
gene_4024	-0.61089	6.15207	0.0308047	0.302856
gene_6264	-1.57098	0.770404	0.0308159	0.302856
gene_4636	-1.0431	4.44903	0.0308777	0.302856
gene_1665	1.23768	2.71044	0.0309356	0.302856
gene_2903	-0.55605	5.11116	0.030961	0.302856
gene_2289	0.703039	7.08076	0.0309827	0.302856
gene_4863	1.13722	4.8097	0.0309935	0.302856
gene_7694	0.724825	4.94032	0.0311277	0.302856
gene_2510	1.17714	2.49541	0.0311338	0.302856
gene_5089	-1.17271	3.60015	0.0311481	0.302856
gene_833	-0.759132	4.95345	0.0311731	0.302856
gene_2987	0.553904	8.0127	0.0311832	0.302856
gene_143	-1.5299	1.86705	0.031236	0.302856
gene_7504	-1.24483	5.43388	0.0312482	0.302856
gene_8861	0.60429	4.75848	0.0312532	0.302856
gene_4322	0.99408	3.76798	0.0312933	0.302856
gene_1769	-0.559868	5.27419	0.0312989	0.302856
gene_2771	1.93746	0.368071	0.0314205	0.303669
gene_442	-0.482098	6.18332	0.031592	0.304662
gene_832	-1.09441	2.40386	0.0316101	0.304662
gene_1421	0.6826	7.60541	0.031666	0.304662
gene_7094	-1.79221	1.45024	0.0316738	0.304662
gene_6335	1.91693	0.508314	0.0317303	0.304845
gene_2003	-2.38316	0.424956	0.0317745	0.304907
gene_4814	1.01483	6.67626	0.0318907	0.305643
gene_6540	-1.55163	-0.399858	0.0319266	0.305643
gene_3159	1.66177	1.4297	0.0319769	0.305763
gene_2846	1.08307	5.16747	0.0321136	0.306707
gene_601	-0.90302	6.36713	0.0321644	0.306831
gene_6834	0.443112	7.36775	0.0323053	0.307813
gene_220	1.1005	4.83971	0.0323791	0.308153
gene_7716	-2.05761	1.43689	0.0324424	0.308393
gene_2121	-1.12149	3.58127	0.0326151	0.309672
gene_8121	-0.745032	10.0593	0.0327906	0.31083
gene_7236	1.3961	5.73931	0.0328139	0.31083
gene_7654	1.43751	6.06501	0.0328842	0.311132
gene_5812	0.962204	3.99604	0.0330394	0.312236
gene_240	-0.817557	3.88663	0.0331372	0.312793
gene_6132	0.839972	4.06558	0.0331926	0.312793
gene_2707	0.430903	6.8173	0.0332267	0.312793
gene_1696	1.36538	4.65232	0.0332529	0.312793
gene_2067	-0.462416	6.52529	0.033303	0.312816
gene_1997	0.812713	7.45511	0.0333708	0.312816
gene_6538	-0.812936	3.59759	0.0333875	0.312816
gene_4044	-1.33914	9.36835	0.0334748	0.312816
gene_5597	-0.613318	5.13943	0.0335007	0.312816
gene_8613	-0.384144	6.10915	0.0335116	0.312816
gene_6084	0.420973	6.65911	0.0335399	0.312816
gene_8783	-1.16645	3.63177	0.0335674	0.312816
gene_2551	-1.51171	1.99745	0.0336029	0.312816
gene_7307	1.03256	4.97652	0.0337066	0.313421
gene_7589	-0.731691	4.57141	0.0337729	0.313677
gene_4080	0.653259	5.60462	0.0338497	0.313797
gene_8844	1.18454	4.06321	0.033905	0.313797
gene_5087	0.536819	7.41072	0.0339513	0.313797
gene_8478	-1.50881	0.927416	0.0339535	0.313797
gene_2616	-1.04686	3.18612	0.0339795	0.313797
gene_5219	1.33781	1.9547	0.0340741	0.314234
gene_427	-1.07504	3.28577	0.0341236	0.314234
gene_7540	0.601372	7.11127	0.0341493	0.314234
gene_5621	1.21058	6.70627	0.034182	0.314234
gene_6791	1.77502	1.82014	0.0342539	0.314538
gene_8161	-1.14796	2.83498	0.0343691	0.315238
gene_4819	-0.623269	8.12517	0.0344274	0.31532
gene_2459	0.539962	5.58853	0.0344559	0.31532
gene_3464	0.702046	5.0898	0.0346116	0.316254
gene_2550	-1.76986	6.35842	0.0347222	0.316254
gene_1879	0.582348	8.19738	0.0347271	0.316254
gene_7472	0.65674	5.55015	0.0347423	0.316254
gene_7117	0.633449	10.0555	0.0347532	0.316254
gene_3951	-0.371693	6.58558	0.0350205	0.318329
gene_7840	0.684534	4.8081	0.0350786	0.318345
gene_6299	0.689902	9.36182	0.0351009	0.318345
gene_3366	0.798702	5.78769	0.03519	0.318709
gene_7063	0.579909	8.02073	0.0352197	0.318709
gene_7224	1.82215	1.27569	0.0353777	0.319004
gene_1608	-1.10039	4.50663	0.0354176	0.319004
gene_4096	0.651731	4.74895	0.0354548	0.319004
gene_7560	-1.28475	1.72345	0.0354806	0.319004
gene_1803	-0.797114	5.56753	0.0355512	0.319004
gene_339	-0.516217	7.83166	0.0355728	0.319004
gene_2356	-0.87669	4.96753	0.0355871	0.319004
gene_6438	-0.941694	3.52726	0.0356068	0.319004
gene_5244	-0.474318	5.8758	0.0356203	0.319004
gene_8174	-1.26285	2.61492	0.0356771	0.319004
gene_3875	0.656397	5.81229	0.0357084	0.319004
gene_3085	-0.576126	6.01705	0.035725	0.319004
gene_6823	-0.798681	4.68436	0.0358559	0.31982
gene_6487	-1.16804	1.90536	0.0359357	0.32014
gene_1081	-1.60259	0.701832	0.0360054	0.32014
gene_8408	-0.710254	5.37585	0.0360104	0.32014
gene_3634	0.474897	6.16941	0.0360993	0.320579
gene_5378	-0.793731	4.52809	0.0361838	0.320977
gene_2154	0.444399	6.105	0.0362291	0.321028
gene_1147	0.508415	5.93249	0.0363331	0.321597
gene_2939	-0.670149	5.53147	0.0364683	0.322442
gene_116	-0.785656	7.14708	0.0366171	0.322964
gene_4602	-1.77306	6.70545	0.0366466	0.322964
gene_4283	0.844616	5.24992	0.036647	0.322964
gene_5653	-0.825803	3.57879	0.036712	0.323185
gene_1887	-1.84918	-0.399858	0.0369033	0.324517
gene_8468	-0.847176	3.89153	0.036988	0.324657
gene_3024	0.48541	6.2887	0.0369995	0.324657
gene_5413	-0.516266	6.28572	0.0371454	0.325466
gene_264	-0.858007	3.59986	0.0371744	0.325466
gene_756	-1.34543	2.26839	0.0372122	0.325466
gene_4370	-1.26084	5.4166	0.0373649	0.326449
gene_1223	-0.741661	7.00953	0.0374076	0.32647
gene_1242	0.871919	4.57398	0.0375666	0.32735
gene_1900	0.438952	6.67335	0.0375893	0.32735
gene_7845	0.513567	7.49789	0.0376714	0.327699
gene_6509	1.34289	1.42031	0.0377103	0.327699
gene_8213	-0.818471	4.04151	0.0378686	0.328139
gene_4690	-1.0936	2.73142	0.0379205	0.328139
gene_4421	0.753104	5.46886	0.0379272	0.328139
gene_7877	0.486358	5.24384	0.0379291	0.328139
gene_2255	-1.2813	2.12403	0.0380373	0.328139
gene_680	-0.581201	5.80597	0.0380563	0.328139
gene_2805	0.576345	9.30614	0.0381497	0.328139
gene_6745	-0.6841	3.69472	0.0381578	0.328139
gene_1501	0.83611	4.31501	0.038284	0.328139
gene_8581	-1.78804	1.09384	0.0382955	0.328139
gene_1240	-1.34292	5.51041	0.0383118	0.328139
gene_4916	0.880682	3.18507	0.0384059	0.328139
gene_5264	-0.773098	4.99957	0.0384124	0.328139
gene_3838	-0.850791	3.84511	0.0384399	0.328139
gene_1356	0.501246	5.96202	0.038453	0.328139
gene_6934	0.471831	6.42391	0.0384874	0.328139
gene_3509	0.720484	4.99589	0.0385208	0.328139
gene_6515	-1.71742	-0.269234	0.0385671	0.328139
gene_1970	0.453472	6.28135	0.0386156	0.328139
gene_7296	-0.523616	5.45882	0.0386539	0.328139
gene_7315	-1.46065	2.22984	0.0386586	0.328139
gene_4160	0.721488	4.01312	0.0386688	0.328139
gene_1838	-0.571209	6.08527	0.0387065	0.328139
gene_8733	0.424008	6.18926	0.0387332	0.328139
gene_2506	-0.517073	6.38505	0.0388551	0.328752
gene_5142	0.63386	4.28667	0.0388868	0.328752
gene_2920	-1.33532	2.2225	0.0392207	0.331229
gene_3463	0.722973	7.20136	0.0392671	0.331275
gene_719	-1.02426	5.73785	0.0393872	0.331943
gene_5639	0.612394	5.78307	0.0395427	0.332628
gene_8780	-0.932585	5.72317	0.0395733	0.332628
gene_4431	0.698499	6.00844	0.0395918	0.332628
gene_3885	0.565413	6.50573	0.0396787	0.333013
gene_2384	-0.477677	5.88647	0.0398656	0.333898
gene_7978	-0.698011	3.66028	0.0398665	0.333898
gene_2626	0.432108	6.68454	0.040013	0.334441
gene_4944	-0.776708	8.48836	0.0400669	0.334441
gene_115	0.631433	4.77819	0.0400877	0.334441
gene_6209	-0.570027	5.74584	0.0401218	0.334441
gene_2513	0.550179	5.97255	0.0401378	0.334441
gene_6524	-0.951666	2.90019	0.0402406	0.334953
gene_1743	-1.42037	3.32638	0.0404938	0.336714
gene_2446	-2.10945	0.313755	0.0406335	0.337529
gene_2142	-0.736905	6.53261	0.040696	0.337687
gene_2631	0.783298	5.44498	0.0407359	0.337687
gene_595	-2.03581	-0.410388	0.0408178	0.337976
gene_1070	-0.83227	3.60459	0.0408542	0.337976
gene_4902	-0.503877	5.13206	0.0409634	0.338534
gene_3012	0.416709	7.97568	0.0410568	0.33896
gene_5238	-1.88052	0.408889	0.0411705	0.339552
gene_2606	-1.16191	1.66154	0.0412233	0.339642
gene_1508	0.946333	3.59172	0.0413652	0.340355
gene_8620	1.36194	0.974501	0.0414002	0.340355
gene_4303	1.08395	6.46386	0.0414493	0.340355
gene_4171	1.14542	6.52344	0.0414781	0.340355
gene_653	2.01068	3.01728	0.0415816	0.34082
gene_6737	0.727321	3.81659	0.0416188	0.34082
gene_1486	1.47799	3.48368	0.0416704	0.340897
gene_8077	1.09228	4.68188	0.0417203	0.340962
gene_6344	0.534259	6.21581	0.0417971	0.341046
gene_1831	-0.754565	4.66662	0.0418149	0.341046
gene_3765	2.33114	2.12707	0.0418888	0.341247
gene_4851	0.559819	5.95475	0.0419238	0.341247
gene_5668	0.446246	9.29038	0.0420076	0.341586
gene_172	-1.73758	-0.131208	0.04205	0.341588
gene_4915	0.550508	4.59136	0.0422297	0.342669
gene_6616	0.533962	5.77256	0.0422903	0.342669
gene_7010	-1.36876	3.67351	0.04231	0.342669
gene_4701	-1.80934	-0.131208	0.0423805	0.342896
gene_6251	-1.64554	0.609809	0.042715	0.345258
gene_740	-0.487481	5.94728	0.0427806	0.345444
gene_3308	-0.855252	3.15038	0.0429697	0.346625
gene_8585	1.27598	1.43902	0.0430924	0.347269
gene_5228	1.69695	-0.529693	0.0433663	0.348975
gene_7483	-0.563138	4.54697	0.0434024	0.348975
gene_4379	0.583486	7.0065	0.0434333	0.348975
gene_1599	0.569515	6.24391	0.0435322	0.349423
gene_7670	-1.05608	6.30386	0.0436813	0.350272
gene_672	-0.979269	3.26613	0.043956	0.352126
gene_8811	-1.05741	5.07901	0.0441654	0.353454
gene_3489	-0.596602	4.77625	0.044232	0.353637
gene_4712	-0.547136	6.06369	0.0443911	0.35424
gene_6638	0.589352	7.6482	0.0444382	0.35424
gene_7254	1.13299	3.05181	0.0444804	0.35424
gene_5181	0.80261	7.07184	0.0444823	0.35424
gene_449	-1.67189	0.801135	0.0445687	0.354555
gene_2740	0.873297	4.44844	0.0446095	0.354555
gene_5277	-1.0412	3.53333	0.0446784	0.354755
gene_43	-0.598441	8.73869	0.0447486	0.354965
gene_2220	-0.614291	6.54924	0.044808	0.355088
gene_461	-1.27099	0.743814	0.0448578	0.355118
gene_4183	-0.529843	5.28762	0.044941	0.355118
gene_3071	-0.693808	5.16207	0.0450075	0.355118
gene_6946	-1.51412	2.653	0.0450327	0.355118
gene_3109	-0.702367	4.38639	0.0451096	0.355118
gene_2041	-0.785774	6.72651	0.0451601	0.355118
gene_4349	-1.17096	4.19188	0.0452055	0.355118
gene_797	-0.974443	3.35017	0.0452604	0.355118
gene_1694	-1.18851	1.99078	0.0452634	0.355118
gene_7919	0.526064	5.50643	0.0452662	0.355118
gene_8611	-0.753351	5.75003	0.045294	0.355118
gene_4192	0.615322	5.51961	0.045351	0.35522
gene_7922	0.396625	6.66935	0.0454229	0.355439
gene_5206	-1.36985	1.61338	0.0454837	0.355572
gene_6410	-0.934586	4.914	0.0456051	0.356177
gene_15	-0.620327	4.23343	0.0456828	0.356254
gene_8205	0.575552	9.09623	0.0457429	0.356254
gene_3193	0.480999	8.1873	0.0457784	0.356254
gene_641	-1.99599	-0.318365	0.0457909	0.356254
gene_2310	1.30385	2.84168	0.0460236	0.357721
gene_706	-0.756009	3.47343	0.0461712	0.358471
gene_1321	0.510596	6.90804	0.0462086	0.358471
gene_3332	0.435003	6.07711	0.0464032	0.359272
gene_6486	-1.18351	1.46709	0.0464447	0.359272
gene_8031	-0.469521	5.85899	0.046445	0.359272
gene_1345	0.53534	5.25367	0.0465213	0.359519
gene_936	0.486829	9.49352	0.0467837	0.360973
gene_6267	0.440718	7.40688	0.0467986	0.360973
gene_4836	0.380711	7.37366	0.0468561	0.361073
gene_6380	-0.70644	4.17952	0.0469415	0.361387
gene_6203	2.05062	0.426821	0.0470009	0.3615
gene_986	-0.649108	4.79988	0.0470593	0.361606
gene_5871	-0.610629	6.03268	0.0472358	0.362619
gene_7692	-1.61453	0.767897	0.047352	0.362833
gene_5283	0.633207	5.09963	0.0473823	0.362833
gene_7636	0.654626	5.21285	0.0473982	0.362833
gene_5279	1.80145	1.35284	0.0475221	0.363438
gene_4441	0.425037	6.64831	0.0475765	0.363511
gene_6384	0.460876	9.40995	0.0480546	0.366818
gene_5837	-0.534772	6.78029	0.0481117	0.366908
gene_3664	-1.09949	2.33728	0.0483408	0.367629
gene_3294	-2.45969	7.43265	0.0483504	0.367629
gene_1494	0.69407	4.97798	0.0483757	0.367629
gene_7891	-0.946491	4.13607	0.0483878	0.367629
gene_5516	-0.985737	2.56352	0.0486733	0.368869
gene_83	-0.933961	9.38004	0.0486832	0.368869
gene_2857	-1.74326	0.641469	0.0486876	0.368869
gene_8772	0.829491	10.671	0.0487843	0.369256
gene_4845	2.08014	0.226896	0.0488937	0.369738
gene_7421	-0.96847	3.37446	0.0490312	0.370432
gene_4848	0.81751	3.64923	0.0491298	0.370832
gene_7443	0.863954	4.15019	0.0492397	0.371315
gene_4727	1.30191	1.48796	0.0496165	0.373808
gene_7703	-0.613865	4.83941	0.0497135	0.374191
gene_7183	-1.00769	4.2508	0.0499068	0.374825
gene_2682	-0.713311	7.39166	0.0499418	0.374825
gene_8258	-0.573343	7.63628	0.0500655	0.374825
gene_5372	-1.10345	1.31322	0.0501721	0.374825
gene_7230	-1.71241	5.76119	0.0502826	0.374825
gene_5348	1.38296	3.36449	0.0503132	0.374825
gene_1258	1.22539	0.749238	0.0503647	0.374825
gene_7521	-0.519375	5.87005	0.0503857	0.374825
gene_4573	-1.36405	1.47926	0.0503942	0.374825
gene_6688	1.75796	1.70978	0.0503986	0.374825
gene_2536	-1.20459	0.84726	0.0504672	0.374825
gene_7027	-1.2434	1.66816	0.050475	0.374825
gene_4729	-1.21839	2.41072	0.0505168	0.374825
gene_8288	2.14786	-0.591886	0.0506048	0.374825
gene_1753	0.426706	7.3372	0.0506062	0.374825
gene_2403	1.09242	5.27642	0.0506472	0.374825
gene_1904	-1.01825	4.42773	0.0506674	0.374825
gene_4465	0.490318	5.71245	0.0506752	0.374825
gene_2756	-0.724283	3.58985	0.0506808	0.374825
gene_6151	-1.05253	3.6956	0.0507527	0.374825
gene_2917	-1.36832	1.25808	0.0507796	0.374825
gene_1448	0.961518	7.22646	0.0508181	0.374825
gene_642	0.599893	5.64172	0.0508622	0.374825
gene_2161	-0.987295	6.50298	0.0509451	0.374924
gene_8556	-1.58768	0.9454	0.0509682	0.374924
gene_1072	-0.765225	8.55359	0.0510759	0.375375
gene_8239	-0.641913	4.39905	0.0511476	0.375562
gene_7441	-0.590588	4.55622	0.0512056	0.375647
gene_3361	0.736509	5.63696	0.0513626	0.376457
gene_7435	-0.473928	6.74322	0.0514673	0.376884
gene_1383	-0.757238	4.27024	0.0515166	0.376904
gene_3521	-0.799156	8.36463	0.0518354	0.378446
gene_4429	0.549489	5.5375	0.0518637	0.378446
gene_246	-1.46767	0.821906	0.051893	0.378446
gene_7412	0.414835	7.39885	0.0519408	0.378446
gene_4393	0.550106	7.04967	0.05197	0.378446
gene_532	-1.37104	1.9343	0.0520296	0.378446
gene_2899	-1.08406	2.79047	0.0520566	0.378446
gene_3377	0.825195	4.83612	0.0522044	0.378446
gene_3507	-0.404579	6.12108	0.0522277	0.378446
gene_5986	0.909652	9.11765	0.0522409	0.378446
gene_3022	-0.66315	4.55091	0.0523454	0.378446
gene_1853	-0.546942	6.39814	0.0523525	0.378446
gene_8763	-0.854823	4.1031	0.052388	0.378446
gene_8193	-1.50166	2.17894	0.0524307	0.378446
gene_3958	-0.531412	7.50345	0.0524485	0.378446
gene_8796	-0.810214	4.44367	0.052486	0.378446
gene_587	0.425837	7.20813	0.052548	0.378446
gene_4740	-0.56331	5.2798	0.0525943	0.378446
gene_701	-1.11597	3.71648	0.0526566	0.378446
gene_6510	0.49083	7.65164	0.0526954	0.378446
gene_7916	0.682171	6.90223	0.0527086	0.378446
gene_3852	-1.21246	5.61887	0.0527824	0.37864
gene_2627	1.01459	2.66882	0.0528704	0.378936
gene_3270	0.728993	3.93173	0.0529889	0.379449
gene_459	0.641085	4.95633	0.0531276	0.379813
gene_2192	-0.418128	5.58353	0.0531334	0.379813
gene_5973	-0.556349	5.46888	0.0535887	0.381932
gene_1683	0.642704	5.95449	0.0536493	0.381932
gene_5443	-1.34029	2.42256	0.0536843	0.381932
gene_1534	0.460634	7.10108	0.0536926	0.381932
gene_1266	-1.00938	3.3709	0.0537462	0.381932
gene_5891	-2.01342	0.375947	0.0537523	0.381932
gene_8750	-1.64376	9.09996	0.0537601	0.381932
gene_2176	-0.983908	4.48307	0.0538607	0.382312
gene_3349	1.01693	3.21867	0.0539619	0.382695
gene_4358	-1.1936	2.90778	0.0544435	0.385463
gene_974	-0.693521	5.25535	0.0544683	0.385463
gene_7408	-0.760596	6.58892	0.0545236	0.385463
gene_3010	-1.4764	-0.0337701	0.0545427	0.385463
gene_3725	0.578919	6.42304	0.0547368	0.386498
gene_3945	0.716551	4.91994	0.0548144	0.386709
gene_3171	-0.691441	5.60791	0.0551175	0.388347
gene_4999	-1.91021	0.494352	0.0551424	0.388347
gene_4015	-0.481846	5.24057	0.055269	0.388899
gene_490	0.525274	6.26055	0.0553816	0.389354
gene_4542	-0.705428	5.09773	0.0555427	0.390148
gene_5019	-0.443949	5.61737	0.0556575	0.390439
gene_4261	0.961271	3.64551	0.0556806	0.390439
gene_4692	-0.566096	6.33427	0.0557916	0.390573
gene_4620	0.747749	6.56362	0.0558302	0.390573
gene_6352	-0.630524	6.80623	0.0558847	0.390573
gene_177	-0.596	5.2674	0.0558927	0.390573
gene_3619	0.544937	5.36133	0.0560598	0.391363
gene_7858	0.562786	7.18018	0.0561173	0.391363
gene_7314	1.23131	0.520335	0.0561506	0.391363
gene_5905	1.4594	4.52563	0.0564807	0.393325
gene_6714	-1.14074	3.4969	0.0565864	0.393722
gene_4546	-1.77886	0.803051	0.0567579	0.394
gene_7108	0.394234	5.80324	0.0568286	0.394
gene_2309	-0.585804	5.43601	0.0569516	0.394
gene_150	-0.712104	3.98505	0.0569959	0.394
gene_7847	-0.429229	6.4703	0.0570692	0.394
gene_1707	-0.961342	3.59477	0.057073	0.394
gene_3848	0.682772	8.31168	0.0570929	0.394
gene_8825	-1.08629	1.54992	0.0571479	0.394
gene_1395	0.485403	6.75998	0.0573523	0.394
gene_3362	-0.645419	5.08314	0.0573528	0.394
gene_5375	0.433651	6.87493	0.0573756	0.394
gene_1446	0.772604	5.41611	0.0574262	0.394
gene_2719	-0.73053	5.58529	0.0574341	0.394
gene_7191	-0.499208	6.30575	0.0574459	0.394
gene_6777	0.59488	10.5306	0.0574561	0.394
gene_2735	-1.13068	3.94916	0.0574946	0.394
gene_2738	0.730658	5.47305	0.0575214	0.394
gene_3312	0.499628	5.65218	0.0575494	0.394
gene_2366	0.602376	5.79687	0.0575738	0.394
gene_1077	-0.432752	6.83043	0.0575992	0.394
gene_5390	-0.924397	5.91917	0.057816	0.395135
gene_8198	0.492662	7.97681	0.0578626	0.395135
gene_2995	-0.409877	5.83534	0.0579933	0.395693
gene_6983	0.7475	6.83556	0.0580813	0.395931
gene_1679	0.414732	8.49969	0.0581259	0.395931
gene_8802	-1.52268	6.95439	0.0582514	0.396207
gene_2557	-0.819719	2.76543	0.0582644	0.396207
gene_2076	1.66242	4.83682	0.0583987	0.39643
gene_2704	0.573478	6.89788	0.0584544	0.39643
gene_5536	-0.620404	4.9271	0.0584876	0.39643
gene_6236	0.415298	6.15089	0.0584929	0.39643
gene_4365	1.35363	1.91961	0.0586578	0.397215
gene_7689	0.506898	7.80181	0.0587494	0.397267
gene_3955	0.600118	5.99212	0.0587636	0.397267
gene_1965	2.00201	0.938428	0.0588601	0.397588
gene_5919	-0.993569	4.78667	0.0589285	0.397718
gene_871	0.631644	4.15263	0.0590502	0.397779
gene_8261	-0.453522	6.10483	0.0590646	0.397779
gene_8039	1.5669	-0.318365	0.0590848	0.397779
gene_8386	0.498509	6.08329	0.0592059	0.397964
gene_790	0.741985	7.16005	0.0592582	0.397964
gene_4949	0.458205	6.6302	0.0592598	0.397964
gene_7338	-0.632366	4.27493	0.0593231	0.398059
gene_2538	1.67648	3.48816	0.0594267	0.398424
gene_1805	-0.425062	6.38032	0.0595266	0.398441
gene_5808	1.68645	0.0235873	0.0595276	0.398441
gene_3770	-0.581218	5.66033	0.0596612	0.398689
gene_7616	0.452485	5.5878	0.0597663	0.398689
gene_3360	0.437232	7.49292	0.0598317	0.398689
gene_7349	0.531841	9.29701	0.0598377	0.398689
gene_6323	-1.59478	-0.114439	0.0598455	0.398689
gene_6008	0.481894	6.40763	0.0599274	0.398689
gene_1796	-1.10028	3.65812	0.0599407	0.398689
gene_7150	-0.582526	5.09564	0.0599727	0.398689
gene_3937	-0.556281	5.57416	0.0600429	0.398689
gene_1462	0.502068	4.98531	0.0600568	0.398689
gene_5210	-0.71866	3.40038	0.060349	0.4003
gene_7400	0.460416	7.01011	0.0605264	0.401148
gene_7257	0.471124	9.10591	0.0606063	0.40135
gene_6950	-0.431323	7.369	0.0606912	0.401583
gene_7202	-0.540114	5.73949	0.0609087	0.402694
gene_815	-0.962792	5.75246	0.0609992	0.402963
gene_8867	-0.498505	4.9447	0.0611112	0.403374
gene_433	-0.808476	3.57832	0.0612062	0.403672
gene_4670	0.647857	4.47468	0.0612787	0.403763
gene_5778	-1.05638	1.83215	0.061366	0.403763
gene_4475	-0.75415	4.65433	0.0613695	0.403763
gene_6870	0.739202	4.49951	0.0615153	0.404345
gene_7553	0.453079	8.59287	0.0616286	0.404345
gene_2512	-0.421224	5.76219	0.061677	0.404345
gene_4555	0.676698	6.97626	0.0616956	0.404345
gene_4476	-0.684167	4.51599	0.0618645	0.404345
gene_774	-0.4365	6.01833	0.0618676	0.404345
gene_6916	0.428814	8.72427	0.0618834	0.404345
gene_7948	-1.0889	1.54101	0.0619581	0.404345
gene_4396	-0.410416	6.01769	0.0619998	0.404345
gene_7874	-1.8256	-0.424029	0.0620479	0.404345
gene_1658	-1.35152	1.12991	0.0620496	0.404345
gene_5208	1.32338	2.43509	0.0620572	0.404345
gene_3872	0.417011	6.85892	0.0623701	0.406015
gene_7708	-0.535468	5.09047	0.0624137	0.406015
gene_3319	-0.788916	3.6924	0.0625063	0.406291
gene_7735	0.502008	7.36037	0.0625954	0.406544
gene_509	1.07647	2.1406	0.0627292	0.407086
gene_8700	-1.84132	0.251685	0.0628586	0.4076
gene_2694	-0.667873	6.65185	0.0630382	0.408079
gene_3376	0.503483	7.2722	0.0630596	0.408079
gene_4447	-0.457579	5.16948	0.0630922	0.408079
gene_1852	1.13315	6.01735	0.063134	0.408079
gene_7928	0.373565	6.49398	0.0631885	0.408105
gene_3314	-1.08605	2.10847	0.0632762	0.408346
gene_7733	0.439258	9.02721	0.0633416	0.408443
gene_7543	0.457796	5.41711	0.0635195	0.409264
gene_1775	0.892123	3.81162	0.0638652	0.411164
gene_1725	0.504198	5.333	0.0639242	0.411217
gene_7344	-0.443743	4.9166	0.0639938	0.411338
gene_8490	-0.622405	6.98556	0.0641871	0.411714
gene_6719	0.393599	6.64719	0.0643958	0.411714
gene_2200	-0.563562	8.30683	0.0644148	0.411714
gene_5466	-1.09218	2.97711	0.0644208	0.411714
gene_6804	-1.16683	3.4082	0.0644355	0.411714
gene_5637	1.72295	0.368545	0.0645056	0.411714
gene_3018	-0.516143	7.48399	0.0647665	0.411714
gene_999	1.78587	3.42693	0.0648299	0.411714
gene_4842	0.473103	7.51435	0.064882	0.411714
gene_5769	0.664058	3.67379	0.0649195	0.411714
gene_6419	-1.64865	1.31307	0.0649201	0.411714
gene_5676	1.08447	3.38902	0.0649737	0.411714
gene_882	-0.589619	5.88763	0.0649896	0.411714
gene_5221	-0.559312	4.57988	0.0650402	0.411714
gene_1057	-0.531998	6.92769	0.0650413	0.411714
gene_2855	-1.22205	3.82695	0.0650518	0.411714
gene_1667	-1.45677	-0.0403479	0.0651256	0.411714
gene_6121	-0.605373	7.21571	0.0651282	0.411714
gene_2782	0.575569	7.31679	0.0651299	0.411714
gene_8176	0.399428	8.04542	0.0651502	0.411714
gene_1893	0.759237	3.93951	0.065166	0.411714
gene_1818	-0.397342	5.20869	0.0652027	0.411714
gene_3654	-0.717493	3.72941	0.06524	0.411714
gene_182	-1.40185	5.67285	0.0653464	0.411714
gene_4281	-1.49756	0.00163345	0.0654169	0.411714
gene_7074	0.614014	5.21702	0.0654178	0.411714
gene_2624	-0.539378	5.35839	0.0654492	0.411714
gene_6057	1.82777	1.11946	0.0654757	0.411714
gene_5533	-1.07331	4.07869	0.0656717	0.412345
gene_7748	0.587058	5.37358	0.0656985	0.412345
gene_4995	-0.717779	3.87662	0.0657493	0.412345
gene_6959	0.510193	6.22519	0.0657797	0.412345
gene_896	-0.801498	6.73438	0.0658557	0.412502
gene_2455	-0.531911	5.27393	0.0659901	0.413025
gene_6989	-1.175	1.81599	0.0661529	0.413621
gene_7803	1.09669	3.57968	0.0662632	0.413621
gene_2639	-0.386881	6.88629	0.0662883	0.413621
gene_7159	0.655169	4.20816	0.0663344	0.413621
gene_8702	-1.59291	-0.448989	0.0663408	0.413621
gene_1245	-0.515873	6.52931	0.0665237	0.414226
gene_2757	1.00574	5.38184	0.0665401	0.414226
gene_8259	-0.599891	5.42551	0.0667213	0.414803
gene_5849	-0.446058	6.39851	0.0667351	0.414803
gene_2089	-0.831855	3.06576	0.0669013	0.415516
gene_7241	0.535635	6.23261	0.0670987	0.416048
gene_3621	-0.410727	10.2646	0.0671295	0.416048
gene_3702	-0.791351	4.82491	0.067141	0.416048
gene_6075	-1.10737	2.21703	0.0672067	0.416137
gene_7490	0.493631	4.65412	0.0673725	0.416845
gene_2802	0.682555	3.8559	0.0674747	0.417158
gene_7726	0.452948	5.61063	0.0676282	0.41756
gene_7556	-0.634613	5.39385	0.0676428	0.41756
gene_4577	0.352081	6.85876	0.0679253	0.418985
gene_3448	0.339557	6.79599	0.0680034	0.419147
gene_49	-0.999961	4.41884	0.06827	0.420218
gene_6765	-1.28418	2.08557	0.0683295	0.420218
gene_6860	-1.39516	5.38597	0.0683634	0.420218
gene_8666	0.458797	5.785	0.0684504	0.420218
gene_1173	0.397173	7.35723	0.0684718	0.420218
gene_1234	0.577501	6.76292	0.0685205	0.420218
gene_588	0.577551	4.66297	0.0685403	0.420218
gene_2368	0.46022	5.34287	0.0686628	0.420651
gene_8758	0.43465	5.87881	0.0687486	0.420858
gene_5424	-0.783373	5.90205	0.0689261	0.421503
gene_5764	-0.711518	5.59322	0.068958	0.421503
gene_7194	0.84908	7.01416	0.0691517	0.422277
gene_1126	0.472223	6.1826	0.0692283	0.422277
gene_2799	-1.62456	1.05228	0.0692411	0.422277
gene_3167	0.952223	4.20051	0.0692973	0.422301
gene_5863	-0.717478	4.77692	0.0696228	0.423415
gene_454	-1.8256	0.0727183	0.0696451	0.423415
gene_5853	0.399569	4.91461	0.0697178	0.423415
gene_1230	-0.317957	6.36863	0.0697689	0.423415
gene_7796	0.42194	7.66258	0.0698462	0.423415
gene_3950	-1.47283	0.741596	0.0698813	0.423415
gene_2678	-1.86803	1.66353	0.0699008	0.423415
gene_494	0.711902	4.99052	0.069947	0.423415
gene_3411	-0.659378	4.74979	0.0699505	0.423415
gene_4296	0.620728	5.70853	0.0701487	0.424297
gene_6905	2.27667	0.398282	0.0704195	0.425147
gene_1922	0.518385	5.62632	0.070475	0.425147
gene_5864	-1.67474	7.58978	0.0704825	0.425147
gene_6963	-0.541118	5.93706	0.0704991	0.425147
gene_3972	-1.18041	2.7151	0.0708798	0.426756
gene_8397	0.549642	4.23358	0.0709502	0.426756
gene_4391	0.357962	7.49999	0.0709593	0.426756
gene_2411	0.652895	6.47145	0.0709919	0.426756
gene_4392	0.534272	6.47064	0.0710793	0.426756
gene_560	-0.50539	4.84394	0.0710821	0.426756
gene_5293	0.460156	4.91182	0.0711844	0.426848
gene_1129	0.458591	6.5652	0.0712635	0.426848
gene_3328	0.449189	5.43753	0.0713655	0.426848
gene_6208	0.459377	7.38628	0.0713726	0.426848
gene_7456	0.498931	7.93289	0.0714449	0.426848
gene_2182	0.376653	6.22268	0.0714722	0.426848
gene_553	-0.904257	3.67577	0.0715239	0.426848
gene_2478	-1.20963	3.40381	0.0715871	0.426848
gene_3903	0.461492	7.15024	0.071627	0.426848
gene_3649	-1.83391	7.00401	0.0716444	0.426848
gene_2905	-1.04523	3.1229	0.0716772	0.426848
gene_984	-0.497844	5.41994	0.071761	0.427033
gene_1661	-0.75776	3.34101	0.0718244	0.427097
gene_3322	1.23809	4.1855	0.072062	0.428195
gene_4040	1.3738	3.64319	0.0722452	0.428969
gene_4737	-1.58922	1.7859	0.0723708	0.429377
gene_7712	-0.485062	5.35322	0.0724199	0.429377
gene_8257	0.380051	6.48907	0.0724884	0.429469
gene_1503	0.477308	5.44987	0.072567	0.429584
gene_7276	1.13009	1.56731	0.072661	0.429584
gene_4292	-1.40834	1.54813	0.0726671	0.429584
gene_1841	-0.83695	3.10774	0.0728654	0.430443
gene_5284	0.474951	7.25415	0.073012	0.430994
gene_6201	-0.724742	4.43974	0.0730966	0.431112
gene_4854	-1.13872	3.53625	0.0731384	0.431112
gene_8197	-0.955511	2.89455	0.0732446	0.431313
gene_3493	0.372712	8.22129	0.0732791	0.431313
gene_1177	-0.662008	4.70346	0.0733944	0.431334
gene_975	-0.676142	4.10299	0.0734011	0.431334
gene_4196	-2.14773	0.0584803	0.0734638	0.431334
gene_3208	-0.360457	7.13338	0.0735462	0.431334
gene_6445	-0.992824	5.70283	0.0735546	0.431334
gene_5704	0.478758	5.4021	0.073602	0.431334
gene_7806	0.650523	6.95569	0.0736555	0.431335
gene_6416	-0.982772	4.41989	0.0738383	0.432057
gene_3357	0.374714	6.13528	0.0739101	0.432057
gene_1047	-1.45334	1.35005	0.0739395	0.432057
gene_6449	-1.05719	5.48734	0.0739922	0.432057
gene_1751	-0.426529	7.2482	0.0742053	0.432989
gene_8224	0.606398	4.82375	0.0742678	0.433041
gene_3339	0.846791	3.50071	0.0743304	0.433095
gene_4509	-1.48677	-0.212701	0.0744108	0.433218
gene_5667	0.545233	5.19399	0.0744585	0.433218
gene_343	0.487663	5.84568	0.0745141	0.43323
gene_7305	1.55442	-0.269234	0.0746584	0.433666
gene_2297	-0.72566	4.78233	0.0747095	0.433666
gene_2579	0.997579	3.56054	0.0747496	0.433666
gene_8011	1.40396	0.750261	0.0748971	0.433824
gene_8400	0.388188	5.76442	0.0749351	0.433824
gene_18	-0.693732	3.12528	0.0749376	0.433824
gene_688	-0.424113	5.67515	0.0750662	0.434258
gene_1293	-0.441265	5.34944	0.0751579	0.434478
gene_3673	-1.43691	0.246954	0.0752961	0.43454
gene_8698	-1.47823	0.215493	0.075316	0.43454
gene_7591	-0.841761	4.67221	0.0753434	0.43454
gene_6440	0.580536	5.45904	0.0754173	0.43454
gene_4695	-0.763356	4.27177	0.075437	0.43454
gene_468	-0.743472	3.7774	0.075491	0.434543
gene_7596	0.553791	7.20377	0.0755715	0.434697
gene_1178	0.548406	7.98885	0.0756684	0.434946
gene_1062	-0.538479	5.52076	0.0758566	0.435718
gene_5847	0.424944	8.39155	0.0759792	0.436
gene_7218	0.520601	5.79088	0.0760927	0.436
gene_3703	0.55473	8.72652	0.0761153	0.436
gene_8184	-0.984884	4.44261	0.0762434	0.436
gene_2548	0.713178	5.45076	0.0762713	0.436
gene_6705	-0.732218	4.51193	0.0763266	0.436
gene_4170	-0.684555	4.0795	0.0764238	0.436
gene_769	0.547139	5.36128	0.0764664	0.436
gene_3074	0.569267	7.39859	0.0764881	0.436
gene_5832	-0.51674	3.98772	0.0765109	0.436
gene_4659	0.517211	5.62888	0.0765149	0.436
gene_2122	-1.26574	0.752479	0.0765517	0.436
gene_755	0.594763	3.86708	0.0766713	0.436167
gene_8461	-1.22677	1.81836	0.0766887	0.436167
gene_26	-0.478034	5.14092	0.0769271	0.436693
gene_4556	0.767151	3.96162	0.076933	0.436693
gene_5483	-0.786061	3.12196	0.0770062	0.436693
gene_2696	-0.368635	7.02199	0.0770369	0.436693
gene_7802	0.543086	6.20674	0.0770508	0.436693
gene_1469	0.907887	6.70601	0.0771531	0.436967
gene_730	0.618837	5.65862	0.0772958	0.437469
gene_5838	0.479734	5.55399	0.0774429	0.437825
gene_3251	-1.7098	-0.080334	0.0774667	0.437825
gene_4012	-0.767936	3.80382	0.0777206	0.438713
gene_1897	-0.661749	3.395	0.0777323	0.438713
gene_6345	0.530241	5.39541	0.0777887	0.438726
gene_8845	-0.645684	8.22217	0.0779356	0.439248
gene_7468	0.962013	3.58959	0.0780386	0.439523
gene_3659	-0.684156	7.22392	0.078144	0.439811
gene_945	0.39396	6.21171	0.0783246	0.439987
gene_2125	-0.564754	9.27831	0.0783479	0.439987
gene_6549	1.82285	0.339262	0.0783723	0.439987
gene_3320	-1.23587	2.00021	0.0783925	0.439987
gene_415	0.41931	9.42785	0.0785664	0.440658
gene_4958	-0.647058	5.27224	0.0786645	0.440667
gene_2511	0.426302	8.92236	0.0786769	0.440667
gene_3796	-0.569693	4.63496	0.0788579	0.441375
gene_3474	-1.34665	1.67418	0.0790217	0.441986
gene_3987	0.3345	6.80231	0.0791963	0.442657
gene_5081	0.306073	7.08411	0.0794071	0.44353
gene_6272	-0.6448	5.49166	0.0796431	0.443905
gene_8632	-1.5291	1.35055	0.0796486	0.443905
gene_3867	0.439455	9.9495	0.0796979	0.443905
gene_4127	-0.738811	2.4707	0.079818	0.443905
gene_4005	0.410863	7.19053	0.0798741	0.443905
gene_5564	-0.90301	2.48696	0.0798844	0.443905
gene_3120	1.42944	2.09065	0.0799408	0.443905
gene_8013	2.76193	3.24219	0.0799422	0.443905
gene_4353	0.739344	3.7726	0.0799675	0.443905
gene_1317	0.650865	5.73058	0.0800306	0.443919
gene_8209	1.19301	2.72204	0.0801045	0.443919
gene_1733	-0.804158	4.00066	0.0801501	0.443919
gene_5493	-0.579522	4.12105	0.0801894	0.443919
gene_5776	-0.429147	5.29517	0.0803599	0.444426
gene_973	-0.570139	6.0084	0.0803906	0.444426
gene_3356	-0.446456	5.76498	0.0805951	0.445085
gene_3136	1.46253	4.28024	0.080637	0.445085
gene_8644	0.52495	6.20033	0.0807166	0.445085
gene_1074	-0.663519	3.91719	0.0807297	0.445085
gene_4731	-0.844321	3.85561	0.0808919	0.445676
gene_56	-1.39424	7.82868	0.0811219	0.446639
gene_4777	0.636186	5.26344	0.0813572	0.44763
gene_6585	-0.330473	6.72251	0.081473	0.447963
gene_7321	0.384505	7.45481	0.0816049	0.448384
gene_3007	-1.03326	2.77329	0.0816914	0.448555
gene_4294	-0.517655	5.29683	0.081771	0.448688
gene_8856	-0.469882	5.67343	0.0819027	0.449015
gene_6653	0.680373	5.54769	0.0819416	0.449015
gene_535	-1.38423	0.811344	0.0821381	0.449788
gene_4666	0.503301	6.81719	0.0822185	0.449924
gene_7222	-0.449999	6.70406	0.0823676	0.450191
gene_612	0.507099	6.37697	0.0823785	0.450191
gene_5017	1.77729	-0.36449	0.0825716	0.450942
gene_7793	-0.615039	4.24135	0.0826299	0.450957
gene_4236	-0.796177	2.90532	0.082788	0.451515
gene_5755	0.823272	9.71056	0.0828673	0.451643
gene_7396	0.494393	7.25939	0.0829904	0.45201
gene_8743	0.638744	5.94547	0.083235	0.453038
gene_5247	1.57999	1.33044	0.0834339	0.453422
gene_2500	0.408863	7.81792	0.0834695	0.453422
gene_276	-0.828305	4.67007	0.0834735	0.453422
gene_7466	-0.35216	5.7925	0.0835962	0.453784
gene_2363	-0.95176	2.68825	0.0837936	0.454551
gene_2666	0.61949	6.66742	0.0839443	0.455063
gene_6388	-0.587378	4.178	0.0842232	0.45627
gene_1381	-0.455528	5.68043	0.0844167	0.456888
gene_7279	0.939636	2.02042	0.0844502	0.456888
gene_4382	-0.735515	8.14595	0.0845658	0.456994
gene_7637	-1.32985	0.644511	0.0847302	0.456994
gene_2944	-0.439241	4.4211	0.0848063	0.456994
gene_820	0.390274	5.90268	0.0848065	0.456994
gene_7613	-0.419952	6.94812	0.0848788	0.456994
gene_3863	-0.403392	5.90623	0.0848979	0.456994
gene_6937	0.616125	4.34638	0.0849204	0.456994
gene_3001	-0.504998	4.26719	0.0849211	0.456994
gene_7960	0.391111	8.64653	0.0851038	0.457664
gene_2647	-0.863262	2.95326	0.0851587	0.457664
gene_3110	0.837426	4.55404	0.0853446	0.458359
gene_7165	0.535918	5.11591	0.0854679	0.458551
gene_8842	-1.28467	-0.301596	0.0854935	0.458551
gene_7450	-0.738259	3.98574	0.0858233	0.459971
gene_3496	-1.83573	0.599174	0.0859116	0.459971
gene_7575	-0.817212	5.02877	0.0859286	0.459971
gene_589	-0.563441	5.16663	0.0859913	0.460002
gene_6511	-0.638262	4.95276	0.0861264	0.460421
gene_1392	-1.42437	3.62339	0.0862038	0.460531
gene_7686	-0.46148	7.24071	0.0863132	0.460811
gene_4564	-0.81216	3.42855	0.0864443	0.461207
gene_3438	-1.59749	-0.134563	0.0865662	0.461452
gene_1690	-0.665606	6.23873	0.0866051	0.461452
gene_5999	0.522401	5.08677	0.0866611	0.461452
gene_1232	-0.406802	6.15444	0.0867331	0.461532
gene_5963	-1.10613	1.03742	0.0868625	0.461706
gene_1256	0.638755	5.43602	0.0868798	0.461706
gene_1075	0.666978	7.14233	0.0869914	0.461996
gene_1276	-1.63783	0.188316	0.087196	0.462779
gene_6386	-0.48097	6.24271	0.0872621	0.462827
gene_4484	0.449954	5.46615	0.0874011	0.46326
gene_8785	-1.05862	3.10219	0.0875531	0.463595
gene_1110	-0.488791	4.50685	0.0876249	0.463595
gene_935	0.557599	3.54542	0.0876361	0.463595
gene_794	-0.692114	3.53882	0.0878209	0.46427
gene_2693	-0.603746	8.72103	0.088056	0.465209
gene_7518	-0.572383	4.06575	0.0881618	0.465464
gene_775	0.572725	3.37826	0.0882909	0.465699
gene_1176	0.997894	2.01061	0.0883444	0.465699
gene_8500	-1.47021	1.9992	0.0883879	0.465699
gene_4047	-0.563993	4.26302	0.0884362	0.465699
gene_5250	-0.901085	4.68844	0.0885099	0.465784
gene_1332	0.571164	7.71366	0.0886746	0.465907
gene_670	-1.45595	0.43963	0.0887058	0.465907
gene_6325	0.519818	4.36261	0.0887059	0.465907
gene_2847	-0.378975	6.26191	0.088969	0.466437
gene_6297	-0.584977	4.44218	0.0889909	0.466437
gene_8068	0.541147	5.42081	0.088996	0.466437
gene_36	1.54153	1.27828	0.0890592	0.466437
gene_6596	0.693886	3.99485	0.0890948	0.466437
gene_4765	-1.2215	2.96524	0.0892713	0.466816
gene_6061	-0.57469	5.69633	0.0892823	0.466816
gene_8858	0.63994	4.618	0.0895091	0.467465
gene_6405	-0.430344	4.97328	0.0895219	0.467465
gene_265	-1.57717	1.85048	0.0897426	0.468153
gene_1406	0.711582	4.50769	0.0897693	0.468153
gene_510	-1.70879	1.1209	0.0898629	0.46834
gene_6837	-0.444379	4.38959	0.0903285	0.470318
gene_765	0.546915	6.75983	0.0903738	0.470318
gene_3184	-0.558601	4.20157	0.090458	0.470318
gene_8680	-1.72155	0.438018	0.0905009	0.470318
gene_4857	-1.01199	2.01497	0.0905444	0.470318
gene_2964	-0.447626	6.12649	0.090591	0.470318
gene_4549	-1.27347	1.26006	0.0908086	0.471079
gene_5835	0.505839	7.54207	0.0908538	0.471079
gene_6635	-0.604759	3.99381	0.0910213	0.471313
gene_8153	-0.297208	6.84944	0.0910426	0.471313
gene_7537	0.481065	5.19532	0.0910735	0.471313
gene_3038	-0.427813	5.81546	0.0912181	0.471497
gene_8855	0.360944	6.59474	0.0912793	0.471497
gene_1400	-0.603317	4.51439	0.0913419	0.471497
gene_6699	1.00119	2.8426	0.091388	0.471497
gene_4501	-1.55058	0.200829	0.0914057	0.471497
gene_5246	1.31049	0.337926	0.0914644	0.471497
gene_8398	0.52952	7.88528	0.0915167	0.471497
gene_4960	-0.4897	6.43945	0.0916735	0.472005
gene_3245	-0.665125	6.63403	0.0919697	0.472847
gene_7893	-1.53584	1.43014	0.0920729	0.472847
gene_8018	0.430884	5.15851	0.0921264	0.472847
gene_50	0.543668	3.86228	0.0921679	0.472847
gene_7105	0.423562	6.36924	0.092244	0.472847
gene_6512	-1.0829	1.29132	0.0922967	0.472847
gene_6050	0.384809	6.58329	0.0923112	0.472847
gene_7353	0.453194	6.36451	0.0923462	0.472847
gene_6049	-1.08943	1.94874	0.0923625	0.472847
gene_7848	0.472111	6.61252	0.0924837	0.473168
gene_2991	0.313999	7.26542	0.0926049	0.473489
gene_6371	-0.379963	5.14193	0.092684	0.473595
gene_4957	-1.2015	3.46747	0.0929481	0.474645
gene_5292	0.856275	3.75821	0.0930783	0.47501
gene_2432	-0.443271	6.7433	0.0934167	0.476126
gene_19	-0.556462	4.11339	0.0934802	0.476126
gene_7684	1.41964	3.33858	0.0934945	0.476126
gene_6283	-0.912826	3.50304	0.0935321	0.476126
gene_2138	0.514533	6.84611	0.0936733	0.476545
gene_2453	0.733576	3.17781	0.0939122	0.477368
gene_2465	1.70243	-0.364965	0.0939528	0.477368
gene_7611	-0.888275	5.00819	0.0941633	0.478137
gene_8282	0.690994	3.74734	0.0943384	0.478726
gene_373	0.696778	4.52782	0.094434	0.478911
gene_1429	0.89621	7.27364	0.0946065	0.479485
gene_2002	-1.06303	2.01624	0.0946961	0.479508
gene_3263	2.10482	1.46056	0.0947293	0.479508
gene_5339	-0.996868	2.30303	0.0949888	0.480521
gene_8695	-0.422026	9.19128	0.0950777	0.48067
gene_8072	-1.25782	1.17811	0.0953836	0.481327
gene_2245	-0.967571	1.44136	0.0953975	0.481327
gene_2240	-0.981044	3.75228	0.0954078	0.481327
gene_1411	0.661975	4.43007	0.0954452	0.481327
gene_7	-0.71909	3.51465	0.0956219	0.481816
gene_4112	-0.833033	3.49984	0.0957063	0.481816
gene_585	0.430496	5.71844	0.095803	0.481816
gene_8462	1.02381	2.29394	0.0959372	0.481816
gene_5954	-0.835284	9.45913	0.0959719	0.481816
gene_8534	0.395983	9.22891	0.0959877	0.481816
gene_2016	1.68911	3.26225	0.0960646	0.481816
gene_2603	0.610653	6.76529	0.0960886	0.481816
gene_1118	-0.482043	5.49717	0.0962239	0.481816
gene_5062	1.00681	2.14188	0.0962468	0.481816
gene_4118	-0.726559	3.69461	0.0962764	0.481816
gene_5828	-0.355318	9.16529	0.0963626	0.481816
gene_1500	-0.365647	5.98552	0.0964497	0.481816
gene_5167	-0.380167	6.92912	0.0964545	0.481816
gene_1489	0.328835	7.02003	0.0964913	0.481816
gene_1663	0.539803	6.85559	0.096494	0.481816
gene_8786	0.739747	2.18503	0.0967906	0.482902
gene_2992	0.696764	5.90728	0.0968309	0.482902
gene_2206	0.373589	7.85314	0.0969407	0.483152
gene_6508	0.558441	6.45452	0.0972531	0.483747
gene_4137	-1.61796	3.47087	0.0972738	0.483747
gene_107	0.770546	3.81026	0.0972926	0.483747
gene_1401	-0.381987	5.32299	0.0974164	0.483747
gene_4045	0.830339	3.39537	0.097437	0.483747
gene_6185	0.408615	6.14756	0.0974573	0.483747
gene_5185	-0.920447	3.26981	0.0974781	0.483747
gene_3943	0.508017	5.38737	0.097604	0.484075
gene_392	1.52978	-0.261832	0.0977333	0.48442
gene_1319	0.927599	4.75	0.0978344	0.484573
gene_2371	-1.01485	1.98849	0.0978839	0.484573
gene_691	0.422235	4.89166	0.098016	0.484629
gene_4232	-0.45589	4.90271	0.0980936	0.484629
gene_3884	-0.405952	5.60612	0.0981523	0.484629
gene_6888	0.803451	5.61606	0.0981591	0.484629
gene_6361	-1.46767	0.0559491	0.0982353	0.484629
gene_5205	-1.73684	0.856935	0.0982543	0.484629
gene_4825	-0.873275	14.194	0.0984822	0.484835
gene_3541	-0.37242	6.29021	0.0985714	0.484835
gene_3155	-0.511009	5.58175	0.098703	0.484835
gene_1991	0.592916	5.32192	0.0987137	0.484835
gene_6166	-0.542672	5.09386	0.0987328	0.484835
gene_3015	-1.35817	1.82425	0.0987344	0.484835
gene_8125	-0.934218	2.31851	0.0987372	0.484835
gene_1003	0.368548	6.28245	0.0987749	0.484835
gene_3323	0.667808	4.56246	0.0988612	0.484965
gene_125	0.491939	4.48143	0.0989824	0.485257
gene_2380	0.408123	8.44751	0.0990406	0.485257
gene_3268	0.467029	7.10829	0.0993745	0.486312
gene_1806	-1.71434	0.354307	0.0993761	0.486312
gene_3805	0.499988	4.11201	0.0994808	0.486531
gene_3439	-0.700021	3.61303	0.0995865	0.486754
gene_5448	-1.58533	0.343111	0.0997419	0.487098
gene_7816	0.510705	6.389	0.0997772	0.487098
gene_8162	0.387551	6.40049	0.0999747	0.487257
gene_8225	0.681808	6.5855	0.100063	0.487257
gene_42	1.63158	2.18119	0.100093	0.487257
gene_6478	1.41309	2.88394	0.100101	0.487257
gene_4377	-0.430238	5.14885	0.100111	0.487257
gene_541	1.54094	3.67614	0.100278	0.487777
gene_2827	-0.342233	5.63969	0.100355	0.48786
gene_7283	-0.532482	5.7364	0.100567	0.488317
gene_3456	0.394156	11.4982	0.100576	0.488317
gene_4590	0.51282	4.72155	0.10063	0.488317
gene_7760	-0.997983	1.96294	0.101022	0.489925
gene_1096	1.18166	5.46075	0.10119	0.490449
gene_5604	-0.513823	5.07491	0.101282	0.490601
gene_1502	-0.625792	3.88143	0.101352	0.49063
gene_3625	0.432024	6.85636	0.101497	0.49063
gene_2695	-1.01083	3.29833	0.101601	0.49063
gene_6881	1.42948	1.72844	0.101637	0.49063
gene_8276	1.47031	1.76783	0.101647	0.49063
gene_5814	-2.23333	0.873778	0.101652	0.49063
gene_7062	0.355883	6.14455	0.101735	0.49074
gene_736	0.843061	4.78749	0.101958	0.491522
gene_6053	-0.435957	5.2624	0.102063	0.491592
gene_5955	1.4473	0.203342	0.102151	0.491592
gene_763	0.557342	5.29313	0.102163	0.491592
gene_2228	0.789322	3.69628	0.102215	0.491592
gene_4959	0.323804	6.6229	0.102362	0.492004
gene_7787	-0.926604	10.0768	0.102468	0.492222
gene_1800	0.307707	6.99256	0.10253	0.492229
gene_3447	-1.33651	1.86393	0.102646	0.492256
gene_639	-1.61961	0.372153	0.102657	0.492256
gene_1846	-0.340318	6.10945	0.102844	0.492537
gene_8265	-1.34335	-0.261832	0.102893	0.492537
gene_7510	0.772873	2.90751	0.102898	0.492537
gene_3697	-1.43281	1.596	0.102986	0.492586
gene_7674	-0.621198	3.90605	0.10303	0.492586
gene_4621	-0.802404	6.08337	0.103271	0.492987
gene_2211	1.02887	8.86103	0.103282	0.492987
gene_3843	-0.284013	6.90456	0.103297	0.492987
gene_5562	0.449193	6.30487	0.103582	0.493765
gene_4598	-1.10729	3.08786	0.103654	0.493765
gene_4568	-0.533185	6.2538	0.103675	0.493765
gene_5995	-0.616924	4.73906	0.103703	0.493765
gene_2770	0.861858	2.23855	0.104267	0.495106
gene_4008	-0.351419	5.22448	0.104303	0.495106
gene_7007	-1.38116	6.34391	0.104304	0.495106
gene_1709	-0.708137	4.32319	0.104338	0.495106
gene_2812	-0.413958	6.62051	0.104343	0.495106
gene_57	-0.609261	6.41084	0.104371	0.495106
gene_2788	0.426951	7.06681	0.104413	0.495106
gene_2720	-0.49082	7.11512	0.104536	0.495401
gene_4951	1.75349	0.323811	0.104729	0.495746
gene_5708	-0.541177	4.04432	0.104732	0.495746
gene_2880	-0.386257	6.38454	0.104891	0.496211
gene_3128	0.353621	5.94062	0.105065	0.496567
gene_3254	0.43509	5.59116	0.105089	0.496567
gene_4561	1.52617	-0.448989	0.10524	0.496989
gene_285	0.527652	8.73612	0.105479	0.497831
gene_7235	0.709746	3.74999	0.105668	0.49834
gene_7147	0.36483	6.79297	0.10571	0.49834
gene_2394	0.807574	3.22342	0.105895	0.498808
gene_374	-0.494681	4.45884	0.105991	0.498808
gene_6340	0.644517	4.24558	0.105994	0.498808
gene_6148	-0.759541	3.32853	0.106115	0.499084
gene_8354	0.795809	3.38448	0.106385	0.499814
gene_2821	-0.674428	3.26323	0.106533	0.499814
gene_2643	-0.946605	3.32057	0.106561	0.499814
gene_562	0.531515	8.54864	0.106618	0.499814
gene_3954	0.582362	5.22256	0.106631	0.499814
gene_8387	0.484916	4.83012	0.106663	0.499814
gene_600	0.521262	6.55731	0.106702	0.499814
gene_1090	0.447355	7.34726	0.106891	0.500347
gene_8440	0.377322	6.77154	0.106939	0.500347
gene_5133	0.710714	4.3321	0.107089	0.500757
gene_3209	-1.45192	-0.22947	0.107273	0.501166
gene_255	-1.88528	0.327605	0.107349	0.501166
gene_3746	-0.460579	5.52129	0.107362	0.501166
gene_1827	0.509353	7.30653	0.107435	0.501192
gene_1280	1.42942	-0.236872	0.107491	0.501192
gene_6194	0.525884	5.33497	0.107678	0.501774
gene_5990	-0.578996	3.83351	0.107753	0.501835
gene_1193	-0.657998	3.46919	0.108386	0.50436
gene_6556	0.574297	6.13793	0.10842	0.50436
gene_7376	0.583018	4.58316	0.108564	0.504528
gene_7323	1.29163	-0.23766	0.10864	0.504528
gene_4222	0.452347	7.40706	0.10878	0.504528
gene_4251	0.401175	6.28555	0.108855	0.504528
gene_283	0.416906	6.03948	0.108864	0.504528
gene_4919	-1.58864	1.26396	0.108928	0.504528
gene_3417	-1.56156	0.392242	0.108946	0.504528
gene_2244	-0.61931	8.13336	0.108954	0.504528
gene_5758	-0.530814	9.94965	0.109057	0.504528
gene_1961	-0.366773	4.95177	0.109079	0.504528
gene_8352	-0.552362	5.6177	0.109232	0.504951
gene_7207	-0.528917	6.88433	0.109452	0.505556
gene_5831	0.618322	6.93204	0.109517	0.505556
gene_8233	-0.622623	5.12233	0.109551	0.505556
gene_3373	-0.455029	8.04358	0.109714	0.506021
gene_278	-0.957808	2.15193	0.109782	0.506048
gene_4364	0.536089	6.47849	0.110187	0.507411
gene_3938	-0.500238	4.54746	0.110264	0.507411
gene_4943	-1.03309	8.25462	0.110271	0.507411
gene_2181	0.331363	8.3546	0.110405	0.507411
gene_3199	0.448013	6.4353	0.11045	0.507411
gene_4552	-1.70332	0.222782	0.110454	0.507411
gene_215	-1.13209	3.67126	0.110627	0.507617
gene_6074	0.568411	3.83912	0.110635	0.507617
gene_2801	-0.714538	3.75816	0.110687	0.507617
gene_5440	-1.55392	-0.71685	0.110834	0.507618
gene_7827	0.381571	6.6138	0.110869	0.507618
gene_156	0.341886	9.13957	0.110906	0.507618
gene_8098	0.751314	4.35171	0.111042	0.507618
gene_3600	0.341135	7.5762	0.111054	0.507618
gene_1662	0.449021	7.70111	0.111063	0.507618
gene_6342	0.41246	6.76163	0.11129	0.508236
gene_7362	-0.790705	3.30263	0.111324	0.508236
gene_1829	0.876742	4.22456	0.111454	0.508544
gene_5383	-1.34878	1.78832	0.111568	0.508777
gene_3426	-0.514039	5.3527	0.111706	0.509118
gene_5112	-0.354648	7.70522	0.111895	0.509694
gene_630	0.33603	5.96449	0.111965	0.509726
gene_1257	0.322679	6.60751	0.112032	0.509745
gene_423	0.63135	7.89508	0.112107	0.509798
gene_3092	-0.514882	6.08899	0.112513	0.511113
gene_207	-0.860555	2.25022	0.112598	0.511113
gene_4968	0.518535	6.63741	0.112698	0.511113
gene_5360	-0.566844	5.06965	0.112751	0.511113
gene_766	-0.620992	6.1367	0.112778	0.511113
gene_7706	0.529111	6.24083	0.112828	0.511113
gene_8760	-0.517929	4.60664	0.112837	0.511113
gene_4988	0.329775	7.16689	0.113195	0.512024
gene_2849	0.400992	6.32069	0.113198	0.512024
gene_2971	-0.312491	6.2041	0.11326	0.512024
gene_2541	-0.461794	5.9138	0.113292	0.512024
gene_6827	-1.27913	1.43896	0.113599	0.512999
gene_1951	-0.417792	5.49691	0.113634	0.512999
gene_321	-0.525759	9.27474	0.113722	0.513111
gene_7152	0.468204	5.17039	0.113813	0.513114
gene_2669	0.989396	2.70884	0.113849	0.513114
gene_979	0.742307	3.02662	0.11394	0.513239
gene_3821	-1.56843	-0.684488	0.114055	0.513468
gene_1113	0.402653	7.93497	0.114248	0.513929
gene_4215	-0.46873	7.49177	0.114284	0.513929
gene_2014	-0.862106	7.90857	0.114659	0.514749
gene_6117	-0.48481	6.81082	0.114689	0.514749
gene_3640	0.549892	6.99637	0.114715	0.514749
gene_1298	-1.47597	1.63875	0.114721	0.514749
gene_7797	0.389933	10.4474	0.114921	0.515099
gene_8443	0.355068	7.26235	0.114948	0.515099
gene_7350	-0.330478	6.2765	0.115087	0.515099
gene_559	0.544545	4.62525	0.115149	0.515099
gene_7138	1.15716	0.261618	0.115169	0.515099
gene_312	-0.468083	5.80875	0.11518	0.515099
gene_6713	0.736637	4.6061	0.115341	0.515533
gene_793	-1.74388	1.73781	0.115638	0.516346
gene_2618	-1.57841	0.971998	0.11565	0.516346
gene_6956	-0.831408	2.63252	0.115823	0.51646
gene_6907	0.52982	4.97713	0.115853	0.51646
gene_744	-0.585544	4.39663	0.115867	0.51646
gene_6781	0.915483	2.55936	0.116121	0.51707
gene_3678	1.52814	-0.156168	0.116151	0.51707
gene_6728	-1.43123	0.0744612	0.116217	0.51707
gene_2188	0.607773	4.746	0.116259	0.51707
gene_5801	-0.621747	3.45249	0.116375	0.517301
gene_1453	1.25359	1.1269	0.116547	0.517724
gene_1259	0.654613	6.47285	0.116625	0.517724
gene_8361	0.468727	4.41304	0.116702	0.517724
gene_7880	-0.706531	4.95328	0.116731	0.517724
gene_5049	-0.575317	3.62283	0.11679	0.517724
gene_1866	-0.88016	2.82814	0.116921	0.517938
gene_1835	1.28661	2.80806	0.11699	0.517938
gene_7522	-0.494585	4.30462	0.11703	0.517938
gene_4639	-1.46286	-0.367496	0.117433	0.519304
gene_2203	-1.44345	0.334921	0.117467	0.519304
gene_173	0.831478	5.9239	0.117652	0.519689
gene_7810	-0.487718	5.41488	0.117785	0.519689
gene_4544	-0.910792	1.85296	0.11787	0.519689
gene_4565	-1.1098	1.44203	0.117876	0.519689
gene_446	-0.481587	5.16681	0.117905	0.519689
gene_3003	-0.388962	4.80712	0.117996	0.519689
gene_2635	-0.483886	4.3576	0.118003	0.519689
gene_8737	1.30799	1.18014	0.118105	0.519853
gene_8437	0.465249	5.16229	0.118253	0.520224
gene_4527	-0.835529	4.57395	0.118463	0.520827
gene_3519	0.383391	6.07886	0.118519	0.520827
gene_7332	-0.937492	2.03083	0.118584	0.520832
gene_4993	0.378981	8.88446	0.118794	0.521344
gene_759	0.720552	7.06541	0.11883	0.521344
gene_5203	-0.731897	3.14415	0.119034	0.521656
gene_5823	-0.840431	3.87933	0.119038	0.521656
gene_4030	1.02381	3.94158	0.119118	0.521656
gene_5462	-0.497641	7.88513	0.119208	0.521656
gene_8353	-0.682821	5.32199	0.119227	0.521656
gene_8308	0.683391	5.70119	0.119287	0.521656
gene_8777	-0.921159	1.72421	0.119388	0.521813
gene_6702	0.508683	4.28667	0.119473	0.521906
gene_1687	0.83877	4.88195	0.119538	0.521906
gene_1861	-0.555022	7.22199	0.119648	0.522105
gene_6181	-1.70431	0.329822	0.119898	0.522915
gene_2191	1.50223	0.539635	0.120022	0.523175
gene_713	-0.717018	4.73629	0.120308	0.52414
gene_3382	0.452851	6.61151	0.120629	0.524375
gene_7943	-0.40795	4.84275	0.120698	0.524375
gene_5312	-0.577537	3.66554	0.120709	0.524375
gene_858	-0.861434	4.5732	0.12071	0.524375
gene_4807	-0.556416	5.48871	0.120728	0.524375
gene_7792	-0.417713	5.73963	0.120751	0.524375
gene_6350	-0.421995	4.99334	0.120846	0.524462
gene_8269	-0.906671	2.72839	0.121045	0.524462
gene_873	-0.486878	7.4808	0.121046	0.524462
gene_3258	0.503223	6.58162	0.121085	0.524462
gene_3740	0.676497	6.31006	0.121166	0.524462
gene_2774	-1.54559	0.0339952	0.121253	0.524462
gene_1112	-0.51516	4.73859	0.121279	0.524462
gene_3779	0.55395	3.65861	0.121327	0.524462
gene_6733	0.804939	7.23789	0.121388	0.524462
gene_7503	-0.795747	2.33872	0.121418	0.524462
gene_3111	0.436199	6.92074	0.121544	0.524727
gene_5105	-0.355895	6.14963	0.121629	0.524813
gene_2915	-0.582573	5.48435	0.121746	0.525037
gene_6614	-1.2589	1.4108	0.121973	0.52507
gene_5162	-0.822975	11.0248	0.121999	0.52507
gene_5149	0.411649	5.52806	0.122015	0.52507
gene_1205	-0.609363	6.15945	0.122106	0.52507
gene_486	0.407118	5.77511	0.122146	0.52507
gene_949	0.507281	4.7193	0.122198	0.52507
gene_7460	-0.806716	3.4282	0.122207	0.52507
gene_4306	0.710289	4.67374	0.122385	0.52535
gene_386	0.527655	6.6655	0.122472	0.52535
gene_5346	0.651403	4.17321	0.122493	0.52535
gene_1609	-0.476508	4.11428	0.122557	0.52535
gene_4637	1.57638	1.48982	0.122688	0.52535
gene_5051	-0.75998	3.95557	0.122805	0.52535
gene_687	0.565138	4.54591	0.122915	0.52535
gene_2953	0.785225	2.06922	0.122924	0.52535
gene_5958	0.407134	8.02099	0.12298	0.52535
gene_7022	0.576465	4.82288	0.123097	0.52535
gene_2376	-0.957857	2.73852	0.123143	0.52535
gene_5659	-0.910062	3.58587	0.123258	0.52535
gene_2887	-0.452756	8.38988	0.123264	0.52535
gene_8427	0.545534	6.93366	0.123303	0.52535
gene_826	0.315058	7.07324	0.123322	0.52535
gene_8336	-1.29462	1.80737	0.123369	0.52535
gene_7308	0.491377	4.82029	0.123375	0.52535
gene_7069	-0.363626	5.84464	0.123506	0.525409
gene_3675	-0.398923	5.36959	0.123613	0.525409
gene_8822	-0.36	5.76397	0.123696	0.525409
gene_1776	-1.12563	1.5944	0.123757	0.525409
gene_6095	-1.59641	0.827579	0.123817	0.525409
gene_6526	0.443502	5.81976	0.123885	0.525409
gene_2644	-0.51284	5.28679	0.124122	0.525409
gene_3324	0.560617	5.89018	0.124167	0.525409
gene_2963	0.426344	5.15526	0.124236	0.525409
gene_3557	0.508982	5.3739	0.124367	0.525409
gene_242	0.432587	6.07848	0.124457	0.525409
gene_8124	0.453214	6.9897	0.124466	0.525409
gene_7076	-0.447936	6.66139	0.124571	0.525409
gene_7764	-0.582121	7.48846	0.124607	0.525409
gene_8178	0.472186	5.73718	0.124628	0.525409
gene_5379	-0.585651	4.49074	0.124634	0.525409
gene_7640	0.30371	7.40991	0.124683	0.525409
gene_5951	-0.733817	3.27502	0.12473	0.525409
gene_67	-0.957038	5.11799	0.12481	0.525409
gene_3627	-0.295696	6.02018	0.12482	0.525409
gene_3856	-0.379866	5.90076	0.124847	0.525409
gene_7641	-0.640831	4.5291	0.124851	0.525409
gene_5878	-1.63826	-0.456391	0.124946	0.525409
gene_1976	-1.22453	2.07015	0.125017	0.525409
gene_8087	0.523509	5.09542	0.125132	0.525409
gene_4256	-0.428642	7.93888	0.125232	0.525409
gene_8395	-0.510473	3.96916	0.125262	0.525409
gene_3538	0.846381	5.31054	0.125265	0.525409
gene_3988	-0.434568	7.34431	0.12527	0.525409
gene_8451	0.426792	7.16681	0.125565	0.526103
gene_6090	0.393142	5.70702	0.125566	0.526103
gene_5114	0.921431	2.86598	0.125717	0.526463
gene_1691	0.871385	3.55808	0.125787	0.526487
gene_8357	-1.37872	0.665382	0.126196	0.527888
gene_3998	-0.346415	5.57629	0.126253	0.527888
gene_746	0.884112	1.45046	0.126416	0.528299
gene_2437	-0.637264	7.20307	0.126514	0.528436
gene_3902	0.832362	2.58637	0.126637	0.528656
gene_648	-1.46221	0.131783	0.126697	0.528656
gene_7551	0.331705	6.81958	0.126841	0.528861
gene_8766	0.430786	6.99748	0.126877	0.528861
gene_3623	-0.491578	4.31292	0.126956	0.528917
gene_5311	-0.423941	4.60356	0.127176	0.529564
gene_554	-1.65249	0.101543	0.127272	0.529609
gene_344	1.00539	2.23907	0.127325	0.529609
gene_2320	-0.65392	3.63254	0.127383	0.529609
gene_5183	0.536452	5.85242	0.127594	0.530003
gene_1933	-0.602434	4.28205	0.127609	0.530003
gene_8487	0.482068	5.8572	0.127998	0.531348
gene_5723	-0.861313	2.34773	0.128103	0.53135
gene_4072	-0.463933	5.90125	0.128138	0.53135
gene_2764	-0.596838	3.62211	0.128196	0.53135
gene_5178	-0.310587	6.19164	0.128371	0.531802
gene_1954	0.328858	5.71864	0.128571	0.531871
gene_4460	-0.639081	6.49474	0.128623	0.531871
gene_1078	-0.42981	5.71978	0.128703	0.531871
gene_271	0.682726	5.48712	0.128724	0.531871
gene_6359	-0.704277	5.68647	0.128728	0.531871
gene_8420	0.928934	2.13116	0.128781	0.531871
gene_2543	-0.334212	6.38875	0.12914	0.53308
gene_4224	-1.32085	-0.195931	0.129327	0.533292
gene_1221	-0.445328	3.89565	0.129401	0.533292
gene_631	-1.26622	-0.47316	0.129479	0.533292
gene_7243	-0.529786	4.36654	0.129562	0.533292
gene_8199	0.381145	6.30874	0.12959	0.533292
gene_8411	0.318346	6.16239	0.129595	0.533292
gene_4583	0.335607	6.63739	0.129759	0.533292
gene_2345	-0.816352	4.6012	0.129764	0.533292
gene_2150	-0.348844	7.19867	0.129784	0.533292
gene_7372	0.476427	5.18819	0.12995	0.53342
gene_6742	0.297915	7.12246	0.129976	0.53342
gene_8662	-0.657826	3.58875	0.130058	0.53342
gene_3793	-1.29917	7.78266	0.130078	0.53342
gene_1068	0.463709	7.48126	0.130329	0.533944
gene_1019	0.587245	8.07862	0.130389	0.533944
gene_4507	-0.489856	4.94264	0.130404	0.533944
gene_126	0.391711	5.31485	0.13059	0.534121
gene_8817	-0.587363	3.47406	0.130708	0.534121
gene_2307	-1.16943	4.20255	0.130781	0.534121
gene_7494	0.383556	7.33628	0.130835	0.534121
gene_5848	-1.05192	4.13487	0.131027	0.534121
gene_2803	-0.450201	5.43876	0.13103	0.534121
gene_2004	-0.356526	6.48939	0.131054	0.534121
gene_6748	-0.380817	5.40918	0.131359	0.534121
gene_1309	-0.699597	7.55452	0.131367	0.534121
gene_2640	0.713916	4.6858	0.13137	0.534121
gene_7659	0.684291	3.62696	0.131433	0.534121
gene_6190	1.03386	0.932461	0.131444	0.534121
gene_6767	-1.17888	-0.120098	0.131445	0.534121
gene_3909	-0.415755	5.5203	0.131478	0.534121
gene_8801	-0.366866	5.95921	0.131492	0.534121
gene_8407	0.337539	6.07951	0.131547	0.534121
gene_4933	0.608288	6.03616	0.131592	0.534121
gene_7190	0.68984	5.89431	0.131692	0.534121
gene_7485	-1.03975	2.07042	0.131712	0.534121
gene_3775	-0.379938	6.52575	0.131802	0.534121
gene_5674	-0.435507	5.00281	0.131832	0.534121
[truncated: 6,100 more rows]

## Sheet: Cellobiose vs. arabinose
Gene	logFC	AveExpr	P.Value	adj.P.Val
gene_6632	-7.23566	8.94201	9.00131e-07	0.00313874
gene_1814	1.52522	7.63571	9.38329e-07	0.00313874
gene_5929	2.09631	5.2122	1.16264e-06	0.00313874
gene_8462	-3.45389	2.29394	3.27703e-06	0.00575824
gene_3889	-5.47578	5.78808	3.83265e-06	0.00575824
gene_8014	-4.53376	9.41811	4.26589e-06	0.00575824
gene_5000	-2.92249	7.7704	7.29e-06	0.00783088
gene_657	-2.01665	7.91369	7.73515e-06	0.00783088
gene_4545	-1.68116	4.77638	9.03116e-06	0.00803625
gene_2755	-1.70733	4.97923	9.92252e-06	0.00803625
gene_8794	-4.24799	5.02397	1.2554e-05	0.00861438
gene_6035	-4.30451	7.13115	1.27636e-05	0.00861438
gene_8792	-3.63609	4.73637	2.10142e-05	0.0130918
gene_6069	2.17915	8.04931	2.39695e-05	0.0135192
gene_6520	-4.17002	-0.465211	3.02726e-05	0.0135192
gene_4863	-2.95975	4.8097	3.09021e-05	0.0135192
gene_5223	-1.35817	7.49107	3.38589e-05	0.0135192
gene_8670	-2.74202	8.52477	3.43902e-05	0.0135192
gene_7695	1.45581	7.29635	3.44318e-05	0.0135192
gene_6521	-5.2792	0.346341	3.52072e-05	0.0135192
gene_1313	-5.62365	9.53023	3.53259e-05	0.0135192
gene_2926	-2.55588	7.0414	3.67232e-05	0.0135192
gene_7654	-3.82256	6.06501	4.48967e-05	0.0158095
gene_462	-3.96257	4.90934	5.3496e-05	0.0180527
gene_6755	-1.21113	5.88294	5.63442e-05	0.0182533
gene_8367	-3.5438	5.81738	6.23149e-05	0.0194111
gene_7775	1.65814	5.6886	6.98461e-05	0.0209512
gene_114	-1.60887	5.35042	7.35321e-05	0.0211711
gene_2823	-2.63523	3.51892	7.58069e-05	0.0211711
gene_690	-1.15762	7.16331	8.34084e-05	0.0225175
gene_2745	1.10739	5.53096	8.88612e-05	0.0232157
gene_954	-1.32345	8.78988	9.64776e-05	0.0244179
gene_6083	1.43342	6.82219	0.000106019	0.0260197
gene_7047	-3.35021	4.60134	0.000110739	0.0263786
gene_5530	-3.59364	7.108	0.000129029	0.0298573
gene_2087	-2.4957	6.00658	0.000137117	0.0308475
gene_2091	-1.52186	5.24023	0.000162293	0.0355246
gene_8089	-1.09037	7.41978	0.000175022	0.0373028
gene_2500	1.03539	7.81792	0.000183401	0.0380862
gene_5895	1.40505	7.43154	0.000199317	0.0403567
gene_5551	1.21441	9.28354	0.000239097	0.0472305
gene_2241	-1.54476	6.32978	0.000248633	0.0479446
gene_2102	-1.07108	10.4404	0.000256678	0.048345
gene_113	-2.47236	3.22113	0.000265843	0.0489332
gene_1839	1.25816	5.26503	0.000273257	0.0491802
gene_1506	-1.99304	5.36258	0.000281657	0.0491888
gene_6284	1.21031	8.27154	0.000285452	0.0491888
gene_5828	0.929423	9.16529	0.000305191	0.0514947
gene_635	-1.35258	4.57312	0.000321022	0.0521265
gene_5539	-2.60422	6.96429	0.000321808	0.0521265
gene_4768	-2.14763	9.82762	0.000337455	0.0535891
gene_6519	-2.28018	3.03089	0.000344703	0.0536875
gene_8793	-4.78488	2.9339	0.00036006	0.0549669
gene_4684	-1.24017	7.60497	0.000366491	0.0549669
gene_4935	-3.29227	7.75212	0.000378039	0.055668
gene_7731	-1.37532	5.24289	0.000428255	0.0614424
gene_1418	-4.83742	0.513466	0.000432426	0.0614424
gene_4457	-1.32126	5.82084	0.000478798	0.0663843
gene_8748	-1.47981	5.87554	0.0004836	0.0663843
gene_5811	1.00663	6.61214	0.000509905	0.0682511
gene_8226	0.951277	7.15264	0.000514053	0.0682511
gene_3464	1.70791	5.0898	0.000554675	0.0724567
gene_1988	-4.19816	4.67525	0.000615376	0.07911
gene_7863	-0.853729	8.79318	0.000629666	0.0795129
gene_5720	-1.2735	6.82824	0.000638145	0.0795129
gene_2701	0.939591	7.11296	0.000672858	0.0825678
gene_7956	-2.93875	4.87118	0.00068855	0.0829956
gene_2754	-1.13963	5.25461	0.00069684	0.0829956
gene_8615	-1.20024	5.56116	0.000735279	0.0863047
gene_4279	-3.13672	1.27846	0.000771064	0.0892122
gene_1143	1.1186	7.17855	0.000803286	0.0916311
gene_197	-2.95758	4.90414	0.000829157	0.0932687
gene_1045	1.44411	6.02764	0.000876908	0.0972887
gene_7234	1.74941	5.21698	0.000963103	0.105408
gene_5354	-2.41153	-0.635357	0.00101154	0.108457
gene_1995	1.05775	7.22674	0.00102555	0.108457
gene_7957	-2.01649	3.01138	0.00104729	0.108457
gene_1696	2.33793	4.65232	0.00105414	0.108457
gene_4521	0.826698	6.25068	0.00105792	0.108457
gene_5604	1.36925	5.07491	0.00109881	0.11124
gene_4171	1.79595	6.52344	0.00112794	0.11278
gene_8074	-1.89465	5.1591	0.00115271	0.113783
gene_6759	1.78304	8.50134	0.00116606	0.113783
gene_929	-1.84747	8.4114	0.00118555	0.114307
gene_8012	-2.76699	1.86137	0.00121814	0.116067
gene_6709	0.923967	7.09733	0.00131384	0.12373
gene_7258	0.825002	7.56929	0.00133905	0.124655
gene_4362	-0.980523	6.02095	0.0013771	0.12674
gene_8630	1.00204	4.70209	0.00144657	0.130663
gene_660	-0.865076	6.37869	0.00145199	0.130663
gene_8047	-2.08074	12.0345	0.00148025	0.131742
gene_4833	-2.91332	5.53595	0.00154191	0.134975
gene_5540	-2.50304	4.43726	0.00155857	0.134975
gene_3844	0.97554	5.91981	0.00156656	0.134975
gene_7026	-1.3171	6.52607	0.00158602	0.135213
gene_2943	-1.43523	4.6395	0.00161663	0.136386
gene_4143	-0.842429	8.16805	0.00165072	0.137827
gene_6815	0.953943	7.9783	0.00167429	0.138152
gene_2753	-1.07844	6.05102	0.00168874	0.138152
gene_1763	1.33735	6.0558	0.00186767	0.151263
gene_1548	-2.2957	1.64994	0.00190126	0.152459
gene_7655	-4.01507	2.05913	0.00192009	0.152459
gene_7559	-0.709362	6.32152	0.0019552	0.153739
gene_4442	2.69587	-0.665188	0.00198601	0.154661
gene_9	-4.38497	5.05789	0.0020651	0.159288
gene_2654	-1.6244	5.11028	0.00211575	0.161655
gene_7259	0.921238	6.74628	0.00224955	0.170272
gene_2541	1.03436	5.9138	0.00229926	0.170703
gene_8841	-1.55478	9.08162	0.00230225	0.170703
gene_286	-0.911208	6.02912	0.00233818	0.170703
gene_2590	0.672659	6.37074	0.00233956	0.170703
gene_8007	-2.3962	5.42922	0.00237167	0.171501
gene_7978	-1.24921	3.66028	0.00245568	0.176005
gene_2039	0.960461	9.2017	0.00254211	0.178114
gene_7069	0.786101	5.84464	0.00254663	0.178114
gene_5990	-1.16458	3.83351	0.00255108	0.178114
gene_3256	-1.93235	13.7969	0.00273542	0.189352
gene_5525	1.04643	6.04655	0.00275976	0.189417
gene_8013	-6.46656	3.24219	0.0028176	0.190588
gene_196	-2.64564	4.67561	0.00282546	0.190588
gene_7621	0.833531	7.15239	0.00284741	0.190588
gene_5285	1.17782	4.98527	0.00291697	0.19109
gene_1896	-2.24546	0.0428877	0.00292495	0.19109
gene_2121	-1.96353	3.58127	0.00292569	0.19109
gene_3017	0.660645	7.3635	0.00298623	0.191759
gene_3055	-2.63176	0.622871	0.00300105	0.191759
gene_601	1.52012	6.36713	0.00301251	0.191759
gene_5912	0.974996	4.94423	0.00303063	0.191759
gene_2140	1.173	4.84217	0.00310876	0.195177
gene_2283	-1.3076	9.01749	0.00319162	0.198482
gene_4786	0.797459	6.70489	0.00322872	0.198482
gene_5872	1.66735	7.65116	0.00323492	0.198482
gene_2576	-1.5127	5.59377	0.00327477	0.199309
gene_927	-0.901534	5.87525	0.00329762	0.199309
gene_8216	-0.969831	6.21011	0.00339919	0.203926
gene_2555	-0.875998	4.94773	0.00358614	0.213106
gene_8336	-2.42056	1.80737	0.00360483	0.213106
gene_5542	0.973987	7.33745	0.00367681	0.213853
gene_625	-7.10434	2.80992	0.00369334	0.213853
gene_2717	1.09085	7.81882	0.00369668	0.213853
gene_7909	0.602606	7.26134	0.00379302	0.21784
gene_6437	1.13253	4.88244	0.00381942	0.21784
gene_879	-1.25544	11.0956	0.00384628	0.21784
gene_366	1.17202	3.34425	0.00387491	0.217937
gene_2014	1.61622	7.90857	0.00391682	0.218775
gene_253	-2.16662	0.968838	0.00396009	0.219676
gene_3997	0.890002	4.81342	0.00413443	0.227787
gene_3154	0.873054	7.63893	0.0042487	0.23115
gene_8535	0.77452	7.36518	0.00425979	0.23115
gene_8822	0.849175	5.76397	0.00428108	0.23115
gene_7276	-2.45958	1.56731	0.00436912	0.23348
gene_2854	2.05186	1.81735	0.00438189	0.23348
gene_105	1.45034	5.31737	0.00444403	0.235243
gene_8215	-1.01244	11.262	0.00455209	0.237417
gene_3781	-0.824983	7.09429	0.00455972	0.237417
gene_8613	-0.538715	6.10915	0.00457304	0.237417
gene_1925	-0.727007	5.25287	0.00464498	0.239616
gene_2903	-0.718808	5.11116	0.0046874	0.240274
gene_6068	1.17077	7.89349	0.00477849	0.241102
gene_8075	-0.81716	6.3637	0.00478897	0.241102
gene_3726	1.049	3.73552	0.00479286	0.241102
gene_1403	-0.641878	7.13319	0.00482306	0.241123
gene_7430	1.16562	3.23469	0.00494768	0.245836
gene_2893	0.865917	6.18613	0.00521599	0.257587
gene_1314	-0.976263	6.57757	0.00537116	0.263643
gene_6067	0.838229	7.49653	0.00560334	0.272057
gene_1240	2.15818	5.51041	0.00560976	0.272057
gene_8509	-0.789351	7.58367	0.00571036	0.27467
gene_6933	1.06535	6.56349	0.00573148	0.27467
gene_1211	1.79417	0.0551607	0.00579335	0.276002
gene_7061	1.95561	1.60269	0.00582883	0.276068
gene_5222	-1.43295	5.35361	0.00619511	0.290028
gene_7260	0.65221	6.38328	0.0062788	0.290028
gene_2285	-1.04352	6.24221	0.00632118	0.290028
gene_7569	-2.61332	-0.226464	0.00632421	0.290028
gene_5871	0.979794	6.03268	0.00633388	0.290028
gene_5976	-1.14886	6.2233	0.00633844	0.290028
gene_4415	0.927822	6.9421	0.00639219	0.290845
gene_8281	1.36091	6.49751	0.00659619	0.295217
gene_4352	-2.22772	-0.120098	0.00661923	0.295217
gene_8669	-0.864855	5.8531	0.00663362	0.295217
gene_5945	-1.4004	6.33552	0.00663409	0.295217
gene_4552	2.94257	0.222782	0.0066924	0.296185
gene_4937	-0.933298	6.81542	0.00697601	0.307058
gene_8203	0.618533	8.72658	0.00706738	0.309398
gene_407	-1.0351	3.88373	0.00716233	0.311869
gene_3255	-1.54137	13.1758	0.0072382	0.313488
gene_5408	0.775947	8.76035	0.00739175	0.316354
gene_5552	0.654461	7.91085	0.00740673	0.316354
gene_8009	-1.46013	2.26459	0.00742156	0.316354
gene_8801	-0.713077	5.95921	0.0075269	0.319164
gene_3467	1.01405	5.15696	0.00778024	0.327385
gene_463	-1.5928	1.21321	0.00781507	0.327385
gene_1997	1.0846	7.45511	0.00784204	0.327385
gene_6980	1.50314	2.94838	0.00794524	0.329992
gene_2499	-1.38263	2.44091	0.0081104	0.333449
gene_1502	0.99032	3.88143	0.0081108	0.333449
gene_6003	2.38681	-0.519285	0.00818857	0.33364
gene_5651	-0.600016	6.01658	0.00819784	0.33364
gene_5117	1.12747	2.94326	0.00856727	0.346931
gene_1605	-1.88871	2.16884	0.00881943	0.353666
gene_3438	2.2848	-0.134563	0.0088209	0.353666
gene_415	0.654774	9.42785	0.00890828	0.35541
gene_41	0.77119	7.7176	0.00899344	0.357048
gene_7797	-0.705656	10.4474	0.00909338	0.359255
gene_5099	0.535711	7.24258	0.00924473	0.363462
gene_3378	1.12791	3.7374	0.00949829	0.371626
gene_7926	-1.25751	3.66292	0.00961025	0.374199
gene_602	-2.40894	2.01724	0.00991025	0.3813
gene_1315	-1.06176	6.75189	0.00991273	0.3813
gene_7050	-1.26548	13.179	0.00993387	0.3813
gene_6353	-0.537764	6.20963	0.0100882	0.385398
gene_6746	0.675778	6.32108	0.010212	0.386353
gene_3822	3.09618	-0.205502	0.0102156	0.386353
gene_1900	0.566238	6.67335	0.0102563	0.386353
gene_1662	0.779796	7.70111	0.0104583	0.39214
gene_5984	-1.87938	2.7086	0.0106123	0.396079
gene_1291	0.632048	6.28274	0.0106901	0.396982
gene_5532	0.497839	6.69333	0.0107709	0.396982
gene_3316	0.970036	7.35633	0.010862	0.396982
gene_2456	-0.492179	6.29428	0.0109065	0.396982
gene_3703	-0.819395	8.72652	0.0110708	0.396982
gene_5203	-1.24366	3.14415	0.0110711	0.396982
gene_2150	0.625106	7.19867	0.0110831	0.396982
gene_5526	0.76755	8.70174	0.011092	0.396982
gene_7400	-0.655745	7.01011	0.0112222	0.396982
gene_7117	-0.793965	10.0555	0.011252	0.396982
gene_6325	0.906412	4.36261	0.0113049	0.396982
gene_3487	-1.15254	3.07574	0.0113501	0.396982
gene_712	-0.610993	5.25227	0.0113791	0.396982
gene_4509	2.21017	-0.212701	0.0114077	0.396982
gene_2853	1.4187	3.15978	0.0114292	0.396982
gene_4851	0.724702	5.95475	0.0114613	0.396982
gene_4653	2.32609	-0.47316	0.011471	0.396982
gene_1497	-0.88085	4.24771	0.0115376	0.396982
gene_3560	0.723932	5.46563	0.0115678	0.396982
gene_5100	0.888434	4.19198	0.0116496	0.398102
gene_8307	1.23901	5.91947	0.0117446	0.399663
gene_5982	-1.1821	3.45917	0.0119525	0.40339
gene_4815	-3.25611	2.99185	0.0119698	0.40339
gene_807	2.08137	-0.424029	0.0120036	0.40339
gene_549	-0.469701	5.8877	0.0120827	0.404371
gene_4000	-0.576439	5.58185	0.0123255	0.409372
gene_2095	1.6681	5.80388	0.0123332	0.409372
gene_548	-0.830308	7.48365	0.0124221	0.41064
gene_7847	0.590895	6.4703	0.0125095	0.411848
gene_8186	-1.62407	4.62181	0.0126144	0.41362
gene_3634	0.59498	6.16941	0.012814	0.418469
gene_17	-2.45266	-0.405431	0.0129695	0.421848
gene_3877	0.521665	6.53463	0.0130315	0.422169
gene_7673	-2.03116	0.62042	0.0132927	0.42707
gene_6343	-1.14559	3.25928	0.0133009	0.42707
gene_2795	1.19245	6.81837	0.013341	0.42707
gene_7662	-0.569517	5.70434	0.0136177	0.433406
gene_2645	-1.06249	4.13	0.0136459	0.433406
gene_1443	0.905909	6.1316	0.0137704	0.435649
gene_5238	2.23619	0.408889	0.0138771	0.437316
gene_7810	-0.848327	5.41488	0.0141702	0.444822
gene_5631	0.728625	5.31087	0.0144837	0.448308
gene_6549	2.54353	0.339262	0.0145476	0.448308
gene_1980	-1.94375	1.17192	0.0146224	0.448308
gene_3448	-0.474216	6.79599	0.0146435	0.448308
gene_3523	-0.690902	5.33549	0.0146864	0.448308
gene_4440	-1.62506	2.03668	0.0147237	0.448308
gene_4879	-1.04298	5.45243	0.0147485	0.448308
gene_6429	1.69387	2.74424	0.0147566	0.448308
gene_1046	-1.25978	5.1756	0.0147794	0.448308
gene_3949	-0.819835	7.30043	0.0149188	0.450765
gene_6698	-0.873934	3.94095	0.0149717	0.450765
gene_5502	0.80311	7.05319	0.0153989	0.456662
gene_5611	0.660584	11.7032	0.0153991	0.456662
gene_3598	1.66938	1.84194	0.0154092	0.456662
gene_3122	-1.49476	1.34529	0.0154458	0.456662
gene_3178	-2.42696	1.15513	0.0154703	0.456662
gene_256	0.503716	8.15976	0.0155128	0.456662
gene_4099	-0.915629	3.01478	0.01563	0.456662
gene_7510	-1.43422	2.90751	0.0157049	0.456662
gene_7501	1.71454	1.0296	0.0157187	0.456662
gene_553	-1.25492	3.67577	0.0157314	0.456662
gene_2389	0.778067	9.31588	0.015892	0.459675
gene_4584	1.77291	1.97851	0.0160529	0.462677
gene_7821	0.556584	7.33869	0.0161894	0.464062
gene_1727	-0.765591	6.97961	0.0162155	0.464062
gene_3323	0.909195	4.56246	0.0163406	0.465996
gene_3439	1.02663	3.61303	0.0167262	0.475318
gene_7936	-0.860236	4.62776	0.0169636	0.480377
gene_6901	-0.549682	6.45197	0.0171566	0.481436
gene_5282	2.31371	0.165461	0.0172435	0.481436
gene_1412	-0.862083	3.96268	0.0172468	0.481436
gene_7207	-0.813433	6.88433	0.0172989	0.481436
gene_2892	0.989161	3.30732	0.0173845	0.481436
gene_941	1.86046	2.26365	0.0173892	0.481436
gene_6593	-0.54355	6.50237	0.0174171	0.481436
gene_5854	-0.965728	4.09663	0.0175168	0.482546
gene_7364	-0.597248	5.57121	0.0177152	0.486358
gene_3274	0.834142	9.76133	0.0178466	0.488254
gene_2974	-0.728052	4.78249	0.0179049	0.488254
gene_6777	-0.773974	10.5306	0.0179906	0.488945
gene_1303	1.02942	10.0341	0.018118	0.489557
gene_2498	0.833682	7.89433	0.018134	0.489557
gene_7712	-0.613055	5.35322	0.0182111	0.489594
gene_737	1.10801	3.1179	0.0182563	0.489594
gene_6858	1.09592	8.40556	0.0187288	0.500609
gene_1406	0.92769	4.50769	0.0188746	0.50229
gene_8192	2.0693	-0.529693	0.0189807	0.50229
gene_3373	0.687486	8.04358	0.0190259	0.50229
gene_2595	-0.499924	5.3353	0.0190398	0.50229
gene_4257	0.554874	7.11781	0.0193153	0.507453
gene_8196	-0.788099	6.00475	0.0193608	0.507453
gene_6780	1.19271	4.01192	0.0194433	0.507972
gene_4460	1.04945	6.49474	0.0195113	0.508108
gene_8839	-0.818199	5.86281	0.0196978	0.511322
gene_5522	1.20904	1.82144	0.0197951	0.512207
gene_6270	1.11267	4.88203	0.0202699	0.521514
gene_1134	-0.493394	5.71692	0.0203053	0.521514
gene_4916	-0.891073	3.18507	0.020348	0.521514
gene_1186	-0.860036	4.4395	0.0204993	0.523735
gene_2002	-1.58446	2.01624	0.0206636	0.525837
gene_6882	-1.41653	2.54571	0.0207493	0.525837
gene_1704	-1.16422	2.95692	0.020811	0.525837
gene_3157	-0.758128	4.3982	0.0208413	0.525837
gene_476	0.986494	8.00016	0.0209995	0.528183
gene_6393	1.83232	2.37246	0.021172	0.528304
gene_3044	-0.628138	6.31909	0.0212443	0.528304
gene_2219	1.49038	2.79039	0.0212745	0.528304
gene_2114	2.0811	-0.733619	0.0213533	0.528304
gene_5970	1.78306	2.18232	0.021364	0.528304
gene_7964	0.762213	6.22911	0.0214394	0.528304
gene_1435	0.933091	3.61561	0.0214927	0.528304
gene_7997	2.05316	-0.177333	0.0215261	0.528304
gene_3365	1.41029	1.00576	0.0219339	0.536685
gene_1047	-1.84448	1.35005	0.0220908	0.538895
gene_7264	1.27262	4.30844	0.0223078	0.542554
gene_5037	1.34048	3.78212	0.0224447	0.544251
gene_8842	-1.99354	-0.301596	0.0229874	0.552429
gene_94	1.23926	2.74262	0.023079	0.552429
gene_2336	-2.19172	0.999188	0.0231437	0.552429
gene_8079	-0.480042	6.04619	0.0231626	0.552429
gene_554	-2.58505	0.101543	0.0232095	0.552429
gene_6772	0.925925	8.47554	0.0232676	0.552429
gene_3848	0.826321	8.31168	0.0232768	0.552429
gene_3317	0.521535	10.1147	0.0233277	0.552429
gene_6782	-1.5309	1.98071	0.0237677	0.555559
gene_5500	0.607034	7.08085	0.0237952	0.555559
gene_1672	0.669636	6.24957	0.0238307	0.555559
gene_3103	0.605933	4.48621	0.0238388	0.555559
gene_2734	1.4316	8.07458	0.0238508	0.555559
gene_8813	-0.926731	4.69001	0.0238714	0.555559
gene_5135	0.595527	7.40436	0.0242245	0.562162
gene_2178	1.54306	1.58585	0.0243022	0.562353
gene_2487	1.03751	6.8965	0.0245832	0.567234
gene_5362	-0.552776	6.25591	0.0250095	0.575431
gene_5627	0.463855	7.043	0.0251584	0.577218
gene_5792	1.68087	1.03069	0.0253859	0.580793
gene_493	0.499186	6.29569	0.0254876	0.581477
gene_5145	-0.913964	4.70098	0.0257281	0.585314
gene_6927	0.637978	4.71146	0.0262925	0.595638
gene_5287	0.827821	5.94367	0.0263452	0.595638
gene_7130	-0.896167	3.08043	0.0264786	0.595638
gene_4101	-0.600007	8.9429	0.0265308	0.595638
gene_3498	-1.12622	3.30125	0.026698	0.595638
gene_6150	-1.57391	-0.529693	0.0267273	0.595638
gene_2775	-0.919827	3.6731	0.026748	0.595638
gene_1442	0.846365	5.55735	0.0267703	0.595638
gene_318	0.61346	5.41312	0.0268702	0.596101
gene_257	0.634102	7.16819	0.0269383	0.596101
gene_2059	1.09375	6.57104	0.0272715	0.601831
gene_5111	1.53078	2.17284	0.0278165	0.612189
gene_4907	2.14719	0.0960654	0.0279781	0.614078
gene_6839	0.547327	5.99827	0.0281951	0.61462
gene_1014	-1.93279	1.15914	0.0282448	0.61462
gene_3466	0.626993	6.40238	0.0282906	0.61462
gene_1888	-0.643379	7.53595	0.0283064	0.61462
gene_7409	0.910548	4.40172	0.0285682	0.617432
gene_3935	0.417888	6.66008	0.0285914	0.617432
gene_5983	-1.18915	13.117	0.0286646	0.617432
gene_8316	-0.720043	6.37485	0.0287717	0.618095
gene_4285	0.884289	3.52385	0.028981	0.620944
gene_568	-0.596884	6.70499	0.029166	0.622864
gene_1679	0.491633	8.49969	0.0292244	0.622864
gene_6732	1.29238	2.64002	0.0293637	0.623023
gene_7127	-0.748525	7.04842	0.0293857	0.623023
gene_6711	1.9071	0.451781	0.0295364	0.623283
gene_5956	1.79858	0.681509	0.0295519	0.623283
gene_5176	0.800219	7.90661	0.029705	0.624659
gene_5978	-0.436566	6.88128	0.0297714	0.624659
gene_7725	0.505236	5.8621	0.0299421	0.626618
gene_7251	1.53778	1.94023	0.0302586	0.626739
gene_8437	0.659261	5.16229	0.0302857	0.626739
gene_5254	0.77284	4.65637	0.0303852	0.626739
gene_2720	0.674811	7.11512	0.0304458	0.626739
gene_723	1.89179	0.9108	0.0305149	0.626739
gene_6595	1.67765	0.945101	0.0306572	0.626739
gene_5182	0.802013	4.32826	0.0307217	0.626739
gene_2642	0.722651	6.71127	0.0307611	0.626739
gene_5969	-1.482	1.93498	0.0308162	0.626739
gene_4008	0.503654	5.22448	0.0308406	0.626739
gene_7302	-1.64208	0.95106	0.0308698	0.626739
gene_3920	-1.44966	4.01515	0.0309123	0.626739
gene_2718	-0.674446	4.62773	0.0310673	0.626739
gene_6817	0.646598	4.40535	0.0310694	0.626739
gene_8468	-1.01558	3.89153	0.0311777	0.626739
gene_8536	0.591483	6.00291	0.0311861	0.626739
gene_5809	0.472103	5.98567	0.0314296	0.627837
gene_4559	-0.890453	3.48802	0.0314737	0.627837
gene_8627	0.648668	7.16305	0.0315089	0.627837
gene_7048	-1.52516	3.75353	0.0315508	0.627837
gene_2314	0.774725	5.53377	0.0316984	0.629229
gene_6248	1.33625	2.05587	0.0321056	0.634632
gene_7955	-2.8461	0.778597	0.0321273	0.634632
gene_2965	0.682828	8.583	0.0323413	0.637304
gene_4145	-0.446729	6.99677	0.032437	0.637637
gene_7953	-2.03843	-0.0304146	0.0325156	0.637637
gene_3027	0.798147	3.49093	0.0327084	0.638825
gene_3360	0.511477	7.49292	0.032781	0.638825
gene_8044	-0.63291	5.83378	0.0329013	0.638825
gene_4752	0.797268	4.49731	0.0329364	0.638825
gene_4129	-0.700558	4.19887	0.0331237	0.638825
gene_6526	0.687697	5.81976	0.0331545	0.638825
gene_183	1.12954	3.93662	0.0331553	0.638825
gene_515	-1.47431	1.77369	0.0332072	0.638825
gene_249	1.26145	5.17828	0.033411	0.641076
gene_5372	1.71805	1.31322	0.0336088	0.641076
gene_4163	0.545061	6.92038	0.0336167	0.641076
gene_1919	1.93484	0.343111	0.0336847	0.641076
gene_7033	-0.673326	12.0567	0.033764	0.641076
gene_8153	0.384159	6.84944	0.0338484	0.641076
gene_1312	2.09462	0.261618	0.0338783	0.641076
gene_2927	-1.84924	0.66019	0.0340099	0.6415
gene_935	-0.774604	3.54542	0.0340952	0.6415
gene_7784	-0.889287	3.82895	0.0342917	0.6415
gene_5509	-1.36714	1.1293	0.0342948	0.6415
gene_5934	-0.734369	6.64228	0.0343714	0.6415
gene_8807	-1.32188	4.05769	0.0343759	0.6415
gene_7773	0.606688	6.05518	0.0347302	0.644672
gene_1872	-2.17606	-0.429688	0.0347743	0.644672
gene_6049	1.50067	1.94874	0.0348756	0.644672
gene_5870	0.821293	7.29417	0.0349457	0.644672
gene_8320	-0.827912	4.7358	0.0351625	0.644672
gene_8620	1.75054	0.974501	0.0351968	0.644672
gene_4615	1.24698	3.45312	0.0353594	0.644672
gene_2274	-0.511414	5.09503	0.0353741	0.644672
gene_6714	-1.50892	3.4969	0.0354565	0.644672
gene_1928	0.933765	3.10641	0.0354707	0.644672
gene_4510	0.644389	5.92942	0.0355445	0.644672
gene_2260	-1.4812	3.82874	0.0356033	0.644672
gene_5122	-0.988952	4.07724	0.0356186	0.644672
gene_8631	1.91628	1.32506	0.0356755	0.644672
gene_4388	-0.63324	5.07397	0.0357648	0.644672
gene_5831	0.843507	6.93204	0.0359104	0.644672
gene_1395	0.539032	6.75998	0.0359648	0.644672
gene_3803	0.514429	6.36072	0.036113	0.644672
gene_5387	1.60832	0.97141	0.0361324	0.644672
gene_23	-0.920965	3.74847	0.0361379	0.644672
gene_1838	-0.561733	6.08527	0.0362515	0.645036
gene_6257	0.807015	3.94773	0.0363832	0.645036
gene_410	1.84413	0.324599	0.0366417	0.645036
gene_1397	0.483752	6.7327	0.0366542	0.645036
gene_8188	-0.446659	6.34682	0.0366713	0.645036
gene_3788	0.731131	4.78712	0.0366808	0.645036
gene_294	-1.05908	2.50923	0.0367725	0.645036
gene_7332	1.09246	2.03083	0.0368269	0.645036
gene_8514	-0.676421	5.38169	0.0368751	0.645036
gene_7469	-0.39683	5.85698	0.0370042	0.645899
gene_1254	0.489256	5.80492	0.0374177	0.649723
gene_8166	-0.618259	6.58367	0.0374745	0.649723
gene_3944	-0.404441	8.72662	0.037509	0.649723
gene_6653	0.729659	5.54769	0.0375442	0.649723
gene_5672	0.43278	7.22837	0.037744	0.651788
gene_8326	-0.815716	6.13265	0.0379652	0.652734
gene_4734	0.477864	6.79172	0.0380122	0.652734
gene_8623	-1.65319	0.685538	0.0380406	0.652734
gene_2448	0.981406	4.65534	0.0382251	0.654514
gene_2	-0.950973	3.42503	0.0383882	0.655919
gene_242	0.610909	6.07848	0.0386333	0.658399
gene_3238	0.744257	5.08499	0.0386959	0.658399
gene_6813	0.602047	7.57889	0.0389343	0.661067
gene_7806	0.770001	6.95569	0.0391882	0.662713
gene_5154	-0.727559	6.349	0.0392701	0.662713
gene_1055	0.798321	4.81572	0.0392767	0.662713
gene_5046	-0.414482	6.45042	0.0394412	0.663352
gene_642	0.583013	5.64172	0.0395488	0.663352
gene_2052	-0.756246	4.54941	0.0395603	0.663352
gene_243	0.838604	4.26462	0.0396479	0.663447
gene_5561	1.80787	1.52806	0.0397803	0.66429
gene_7051	-0.990996	3.59118	0.0399026	0.664961
gene_7049	-1.33287	8.06139	0.0406668	0.675975
gene_4692	-0.615959	6.33427	0.0407305	0.675975
gene_3169	0.779049	10.535	0.0409153	0.677515
gene_3857	-0.410666	6.19987	0.0409946	0.677515
gene_8564	-1.97519	1.12926	0.0410742	0.677515
gene_7907	-0.778362	8.70452	0.0412409	0.678882
gene_6597	0.531751	6.19136	0.0413589	0.679444
gene_127	1.72042	3.4339	0.0414445	0.679471
gene_3082	-0.536855	5.4127	0.0415958	0.680217
gene_8392	0.823434	3.9014	0.0416579	0.680217
gene_4306	0.873438	4.67374	0.0418416	0.681842
gene_7563	0.761836	5.042	0.042256	0.686417
gene_3574	-0.590946	6.93941	0.0424019	0.686417
gene_5743	-0.740093	4.8955	0.0424132	0.686417
gene_8471	1.27477	3.78368	0.0424614	0.686417
gene_8846	0.54797	6.26837	0.0427099	0.689058
gene_1070	-0.779034	3.60459	0.0431103	0.694136
gene_1918	-0.433234	5.83256	0.0432259	0.694506
gene_5637	1.86607	0.368545	0.0433509	0.694506
gene_6942	1.16181	3.84756	0.0434185	0.694506
gene_5886	0.416797	7.22963	0.0434763	0.694506
gene_4402	0.648287	4.83349	0.0435799	0.69479
gene_2309	-0.653736	5.43601	0.0438471	0.697678
gene_3062	-0.415339	5.81085	0.0440503	0.698965
gene_2287	-0.446687	5.29479	0.0442022	0.698965
gene_3918	-0.680162	5.83324	0.0442171	0.698965
gene_5906	-0.445041	8.01669	0.0443342	0.698965
gene_5369	1.45956	2.88974	0.0443595	0.698965
gene_2579	1.18286	3.56054	0.0446279	0.701828
gene_7823	0.538516	8.24447	0.0448532	0.70339
gene_8480	-0.989775	2.71947	0.0449009	0.70339
gene_6448	0.492814	6.26382	0.0451466	0.705873
gene_5948	0.507444	5.87923	0.0454232	0.707981
gene_1588	0.575157	6.69488	0.0454562	0.707981
gene_2767	1.78083	0.432481	0.0459221	0.710954
gene_7517	1.55386	-0.0255437	0.0459421	0.710954
gene_252	-0.82634	5.82282	0.0460492	0.710954
gene_5011	0.755645	5.13221	0.0460725	0.710954
gene_4554	-1.34335	2.2824	0.0462161	0.710954
gene_8204	0.380235	6.20569	0.0462938	0.710954
gene_1577	-1.04993	3.43258	0.0464755	0.710954
gene_4730	0.767603	4.58693	0.046537	0.710954
gene_608	0.397893	8.60011	0.0465886	0.710954
[truncated: 7,570 more rows]

## Sheet: Cellobiose vs. glucose
Gene	logFC	AveExpr	P.Value	adj.P.Val
[truncated: 8,099 more rows]

## Sheet: Cellobiose vs. no sugar
Gene	logFC	AveExpr	P.Value	adj.P.Val
[truncated: 8,099 more rows]

[truncated: 2 more sheets: Arabinose vs. glucose, Arabinose vs. no sugar]
